# Supplementary material
Source: MDPI journal article supplement (https://www.mdpi.com/2304-6740/7/8/100)
Supplement: s1 [file s1]

Archive with 3 entries (3 files):
- LAlH_Pbca.cif
- Supplementary.pdf
- checkcif.pdf
