# Supplementary material
Source: MDPI journal article supplement (https://www.mdpi.com/2304-6740/7/8/100)
Supplement: s1 [file s1 › LAlH_Pbca.cif]

data_LAlH_a

_audit_update_record
;
2019-07-11 # Formatted by publCIF

;
_publcif_datablock.id '{6459223e-2f87-4982-9d9c-1ff6a8e0e45c}'

# publcif _publ_body_element loop start
loop_
_publ_body_element
_publ_body_title
_publ_body_contents

 section 
;
Chemical context
; 
;

;
 section 
;
Structural commentary
; 
;

;
 section 
;
Supramolecular features
; 
;

;
 section 
;
Database survey
; 
;

;
 section 
;
Synthesis and crystallization
; 
;

;
 section 
;
Refinement
;
;
Crystal data, data collection and structure refinement details are summarized
in Table 1.
;

# publcif _publ_body_element loop end
 
_audit_creation_method            'SHELXL-2018/3'
_shelx_SHELXL_version_number      '2018/3'
_chemical_name_systematic         ?
_chemical_name_common             ?
_chemical_melting_point           ?
_chemical_formula_moiety          'C39 H47 Al N2'
_chemical_formula_sum             'C39 H47 Al N2'
_chemical_formula_weight          570.76

loop_
 _atom_type_symbol
 _atom_type_description
 _atom_type_scat_dispersion_real
 _atom_type_scat_dispersion_imag
 _atom_type_scat_source
 'C'  'C'   0.0033   0.0016
 'International Tables Vol C Tables 4.2.6.8 and 6.1.1.4'
 'H'  'H'   0.0000   0.0000
 'International Tables Vol C Tables 4.2.6.8 and 6.1.1.4'
 'Al'  'Al'   0.0645   0.0514
 'International Tables Vol C Tables 4.2.6.8 and 6.1.1.4'
 'N'  'N'   0.0061   0.0033
 'International Tables Vol C Tables 4.2.6.8 and 6.1.1.4'
 
_space_group_crystal_system       orthorhombic
_space_group_IT_number            61
_space_group_name_H-M_alt         'P b c a'
_space_group_name_Hall            '-P 2ac 2ab'
 
_shelx_space_group_comment
;
The symmetry employed for this shelxl refinement is uniquely defined
by the following loop, which should always be used as a source of
symmetry information in preference to the above space-group names.
They are only intended as comments.
;
 
loop_
 _space_group_symop_operation_xyz
 'x, y, z'
 '-x+1/2, -y, z+1/2'
 '-x, y+1/2, -z+1/2'
 'x+1/2, -y+1/2, -z'
 '-x, -y, -z'
 'x-1/2, y, -z-1/2'
 'x, -y-1/2, z-1/2'
 '-x-1/2, y-1/2, z'
 
_cell_length_a                    16.0206(3)
_cell_length_b                    24.7785(5)
_cell_length_c                    16.9022(4)
_cell_angle_alpha                 90
_cell_angle_beta                  90
_cell_angle_gamma                 90
_cell_volume                      6709.6(2)
_cell_formula_units_Z             8
_cell_measurement_temperature     88(2)
_cell_measurement_reflns_used     81489
_cell_measurement_theta_min       1.75
_cell_measurement_theta_max       27.48
 
_exptl_crystal_description        'block'
_exptl_crystal_colour             'yellow'
_exptl_crystal_density_meas       ?
_exptl_crystal_density_method     'not measured'
_exptl_crystal_density_diffrn     1.130          
_exptl_crystal_F_000              2464
_exptl_transmission_factor_min    ?
_exptl_transmission_factor_max    ?
_exptl_crystal_size_max           0.70
_exptl_crystal_size_mid           0.30
_exptl_crystal_size_min           0.25
_exptl_absorpt_coefficient_mu     0.089
_shelx_estimated_absorpt_T_min    ?
_shelx_estimated_absorpt_T_max    ?
_exptl_absorpt_correction_type    empirical
_exptl_absorpt_correction_T_min   0.8612
_exptl_absorpt_correction_T_max   1.0000
_exptl_absorpt_process_details    'ABSCOR, (Rigaku, 1995)'
_diffrn_ambient_temperature       88(2)
_diffrn_radiation_wavelength      0.71075
_diffrn_radiation_type            MoK\a
_diffrn_source                    'fine-focus sealed tube'
_diffrn_measurement_device_type   'Rigaku Raxis Rapid'
_diffrn_measurement_method        'oscillation method'
_diffrn_detector_area_resol_mean  ?
_diffrn_reflns_number             101680
_diffrn_reflns_av_unetI/netI      0.0195
_diffrn_reflns_av_R_equivalents   0.0439
_diffrn_reflns_limit_h_min        -20
_diffrn_reflns_limit_h_max        20
_diffrn_reflns_limit_k_min        -31
_diffrn_reflns_limit_k_max        32
_diffrn_reflns_limit_l_min        -21
_diffrn_reflns_limit_l_max        21
_diffrn_reflns_theta_min          2.402
_diffrn_reflns_theta_max          27.486
_diffrn_reflns_theta_full         25.242
_diffrn_measured_fraction_theta_max   0.999
_diffrn_measured_fraction_theta_full  1.000
_diffrn_reflns_Laue_measured_fraction_max    0.999
_diffrn_reflns_Laue_measured_fraction_full   1.000
_diffrn_reflns_point_group_measured_fraction_max   0.999
_diffrn_reflns_point_group_measured_fraction_full  1.000
_reflns_number_total              7680
_reflns_number_gt                 6542
_reflns_threshold_expression      'I > 2\s(I)'
_reflns_Friedel_coverage          0.000
_reflns_Friedel_fraction_max      .
_reflns_Friedel_fraction_full     .
 
_reflns_special_details
;
 Reflections were merged by SHELXL according to the crystal
 class for the calculation of statistics and refinement.
 
 _reflns_Friedel_fraction is defined as the number of unique
 Friedel pairs measured divided by the number that would be
 possible theoretically, ignoring centric projections and
 systematic absences.
;
 
_computing_data_collection        'RAPID AUTO (Rigaku, 2017)'
_computing_cell_refinement        'RAPID AUTO (Rigaku, 2017)'
_computing_data_reduction         'RAPID AUTO (Rigaku, 2017)'
_computing_structure_solution     'SHELXT 2018/2 (Sheldrick, 2018)'
_computing_structure_refinement   'SHELXL-2018/3 (Sheldrick, 2018)'
_computing_molecular_graphics     'ShelXle (J. Appl. Cryst., 44, (2011) 1281-1284.)'
_computing_publication_material   'ShelXle (J. Appl. Cryst., 44, (2011) 1281-1284.)'
_refine_special_details           ?
_refine_ls_structure_factor_coef  Fsqd
_refine_ls_matrix_type            full
_refine_ls_weighting_scheme       calc
_refine_ls_weighting_details
'w=1/[\s^2^(Fo^2^)+(0.0499P)^2^+3.1542P] where P=(Fo^2^+2Fc^2^)/3'
_atom_sites_solution_primary      dual
_atom_sites_solution_secondary    difmap
_atom_sites_solution_hydrogens    mixed
_refine_ls_hydrogen_treatment     mixed
_refine_ls_extinction_method      none
_refine_ls_extinction_coef        .
_refine_ls_number_reflns          7680
_refine_ls_number_parameters      393
_refine_ls_number_restraints      0
_refine_ls_R_factor_all           0.0535
_refine_ls_R_factor_gt            0.0428
_refine_ls_wR_factor_ref          0.1055
_refine_ls_wR_factor_gt           0.1001
_refine_ls_goodness_of_fit_ref    1.048
_refine_ls_restrained_S_all       1.048
_refine_ls_shift/su_max           0.016
_refine_ls_shift/su_mean          0.003
 
loop_
 _atom_site_label
 _atom_site_type_symbol
 _atom_site_fract_x
 _atom_site_fract_y
 _atom_site_fract_z
 _atom_site_U_iso_or_equiv
 _atom_site_adp_type
 _atom_site_occupancy
 _atom_site_site_symmetry_order  
 _atom_site_calc_flag
 _atom_site_refinement_flags_posn
 _atom_site_refinement_flags_adp
 _atom_site_refinement_flags_occupancy
 _atom_site_disorder_assembly
 _atom_site_disorder_group
Al1 Al 0.31293(2) 0.39211(2) 0.14318(2) 0.01559(9) Uani 1 1 d . . . . .
H1A H 0.2700(9) 0.3884(6) 0.0576(9) 0.019 Uiso 1 1 d . U . . .
H1B H 0.3957(9) 0.4265(6) 0.1461(9) 0.019 Uiso 1 1 d . U . . .
N1 N 0.32583(6) 0.32265(4) 0.18890(6) 0.0147(2) Uani 1 1 d . . . . .
C1 C 0.31390(7) 0.31385(5) 0.26625(7) 0.0151(2) Uani 1 1 d . . . . .
C2 C 0.28156(8) 0.35364(5) 0.31694(7) 0.0161(2) Uani 1 1 d . . . . .
H2 H 0.286181 0.346762 0.370851 0.019 Uiso 1 1 calc R U . . .
N2 N 0.24022(6) 0.42052(4) 0.22153(6) 0.0146(2) Uani 1 1 d . . . . .
C3 C 0.24295(7) 0.40273(5) 0.29597(7) 0.0147(2) Uani 1 1 d . . . . .
C5 C 0.40138(8) 0.22922(5) 0.28183(8) 0.0206(3) Uani 1 1 d . . . . .
H5 H 0.439477 0.242840 0.245438 0.025 Uiso 1 1 calc R U . . .
C4 C 0.33166(8) 0.25982(5) 0.30275(7) 0.0163(2) Uani 1 1 d . . . . .
C6 C 0.41437(9) 0.17856(5) 0.31491(9) 0.0248(3) Uani 1 1 d . . . . .
H6 H 0.460715 0.158364 0.300051 0.030 Uiso 1 1 calc R U . . .
C7 C 0.35873(9) 0.15798(5) 0.36986(8) 0.0244(3) Uani 1 1 d . . . . .
H7 H 0.366899 0.123723 0.390977 0.029 Uiso 1 1 calc R U . . .
C8 C 0.29094(9) 0.18867(6) 0.39313(8) 0.0239(3) Uani 1 1 d . . . . .
H8 H 0.254274 0.175509 0.431181 0.029 Uiso 1 1 calc R U . . .
C9 C 0.27762(8) 0.23909(5) 0.35974(8) 0.0209(3) Uani 1 1 d . . . . .
H9 H 0.231801 0.259411 0.375677 0.025 Uiso 1 1 calc R U . . .
C10 C 0.20426(8) 0.43393(5) 0.36241(7) 0.0163(2) Uani 1 1 d . . . . .
C11 C 0.12511(8) 0.45742(5) 0.35627(8) 0.0188(3) Uani 1 1 d . . . . .
H11 H 0.094150 0.452972 0.310186 0.023 Uiso 1 1 calc R U . . .
C12 C 0.09245(9) 0.48729(5) 0.41841(8) 0.0224(3) Uani 1 1 d . . . . .
H12 H 0.039874 0.502855 0.413592 0.027 Uiso 1 1 calc R U . . .
C13 C 0.13752(9) 0.49408(6) 0.48740(8) 0.0238(3) Uani 1 1 d . . . . .
H13 H 0.115707 0.514598 0.528577 0.029 Uiso 1 1 calc R U . . .
C14 C 0.21552(9) 0.47015(6) 0.49505(8) 0.0242(3) Uani 1 1 d . . . . .
H14 H 0.245688 0.474190 0.541681 0.029 Uiso 1 1 calc R U . . .
C15 C 0.24840(8) 0.44021(5) 0.43308(8) 0.0201(3) Uani 1 1 d . . . . .
H15 H 0.300511 0.424114 0.438658 0.024 Uiso 1 1 calc R U . . .
C16 C 0.33993(8) 0.27843(5) 0.13450(7) 0.0156(2) Uani 1 1 d . . . . .
C17 C 0.27454(8) 0.24184(5) 0.11910(8) 0.0171(2) Uani 1 1 d . . . . .
C18 C 0.28990(8) 0.19998(5) 0.06599(8) 0.0211(3) Uani 1 1 d . . . . .
H18 H 0.248117 0.174858 0.055835 0.025 Uiso 1 1 calc R U . . .
C19 C 0.36605(9) 0.19504(5) 0.02807(8) 0.0235(3) Uani 1 1 d . . . . .
H19 H 0.375487 0.166433 -0.006407 0.028 Uiso 1 1 calc R U . . .
C20 C 0.42802(8) 0.23269(5) 0.04154(8) 0.0219(3) Uani 1 1 d . . . . .
H20 H 0.478533 0.229635 0.014796 0.026 Uiso 1 1 calc R U . . .
C21 C 0.41630(8) 0.27523(5) 0.09453(8) 0.0174(3) Uani 1 1 d . . . . .
C22 C 0.20146(8) 0.47139(5) 0.20031(7) 0.0157(2) Uani 1 1 d . . . . .
C23 C 0.12728(8) 0.47010(5) 0.15555(7) 0.0177(3) Uani 1 1 d . . . . .
C24 C 0.09080(8) 0.51931(6) 0.13521(8) 0.0222(3) Uani 1 1 d . . . . .
H24 H 0.041425 0.519439 0.106276 0.027 Uiso 1 1 calc R U . . .
C25 C 0.12640(9) 0.56784(6) 0.15709(9) 0.0243(3) Uani 1 1 d . . . . .
H25 H 0.100424 0.600178 0.143929 0.029 Uiso 1 1 calc R U . . .
C26 C 0.20085(9) 0.56820(5) 0.19869(8) 0.0222(3) Uani 1 1 d . . . . .
H26 H 0.225052 0.601059 0.212154 0.027 Uiso 1 1 calc R U . . .
C27 C 0.24034(8) 0.52038(5) 0.22081(8) 0.0176(3) Uani 1 1 d . . . . .
C28 C 0.18786(8) 0.24887(5) 0.15421(8) 0.0190(3) Uani 1 1 d . . . . .
H28 H 0.191473 0.275726 0.196642 0.023 Uiso 1 1 calc R U . . .
C29 C 0.12886(9) 0.27073(6) 0.09075(9) 0.0288(3) Uani 1 1 d . . . . .
H29A H 0.150808 0.303872 0.069963 0.043 Uiso 1 1 calc R U . . .
H29B H 0.074938 0.277232 0.113620 0.043 Uiso 1 1 calc R U . . .
H29C H 0.123780 0.244800 0.048821 0.043 Uiso 1 1 calc R U . . .
C30 C 0.15377(9) 0.19670(6) 0.18961(10) 0.0276(3) Uani 1 1 d . . . . .
H30A H 0.147075 0.170314 0.148502 0.041 Uiso 1 1 calc R U . . .
H30B H 0.100712 0.203639 0.213960 0.041 Uiso 1 1 calc R U . . .
H30C H 0.192078 0.183315 0.228626 0.041 Uiso 1 1 calc R U . . .
C31 C 0.48630(8) 0.31584(5) 0.10731(8) 0.0195(3) Uani 1 1 d . . . . .
H31 H 0.468987 0.340543 0.149517 0.023 Uiso 1 1 calc R U . . .
C32 C 0.50106(9) 0.34927(6) 0.03244(9) 0.0261(3) Uani 1 1 d . . . . .
H32A H 0.513917 0.325619 -0.010872 0.039 Uiso 1 1 calc R U . . .
H32B H 0.546848 0.373571 0.040959 0.039 Uiso 1 1 calc R U . . .
H32C H 0.451662 0.369567 0.020267 0.039 Uiso 1 1 calc R U . . .
C33 C 0.56760(9) 0.28880(6) 0.13309(9) 0.0273(3) Uani 1 1 d . . . . .
H33A H 0.558177 0.268642 0.180758 0.041 Uiso 1 1 calc R U . . .
H33B H 0.609255 0.315898 0.142557 0.041 Uiso 1 1 calc R U . . .
H33C H 0.586456 0.264882 0.092137 0.041 Uiso 1 1 calc R U . . .
C34 C 0.08536(8) 0.41780(6) 0.13012(8) 0.0206(3) Uani 1 1 d . . . . .
H34 H 0.121421 0.387789 0.146161 0.025 Uiso 1 1 calc R U . . .
C35 C 0.07532(11) 0.41543(7) 0.04052(9) 0.0330(3) Uani 1 1 d . . . . .
H35A H 0.039462 0.444201 0.023438 0.049 Uiso 1 1 calc R U . . .
H35B H 0.051201 0.381412 0.025827 0.049 Uiso 1 1 calc R U . . .
H35C H 0.128987 0.419189 0.015851 0.049 Uiso 1 1 calc R U . . .
C36 C 0.00028(11) 0.40993(8) 0.16955(11) 0.0429(4) Uani 1 1 d . . . . .
H36A H 0.006951 0.410060 0.225992 0.064 Uiso 1 1 calc R U . . .
H36B H -0.023098 0.376055 0.153149 0.064 Uiso 1 1 calc R U . . .
H36C H -0.036406 0.438730 0.154249 0.064 Uiso 1 1 calc R U . . .
C37 C 0.32325(8) 0.52329(5) 0.26481(8) 0.0189(3) Uani 1 1 d . . . . .
H37 H 0.338130 0.486611 0.281310 0.023 Uiso 1 1 calc R U . . .
C38 C 0.39303(8) 0.54433(5) 0.21101(9) 0.0234(3) Uani 1 1 d . . . . .
H38A H 0.397569 0.521560 0.165260 0.035 Uiso 1 1 calc R U . . .
H38B H 0.444933 0.544101 0.239390 0.035 Uiso 1 1 calc R U . . .
H38C H 0.380289 0.580511 0.194679 0.035 Uiso 1 1 calc R U . . .
C39 C 0.31734(9) 0.55829(6) 0.33917(9) 0.0260(3) Uani 1 1 d . . . . .
H39A H 0.308060 0.595180 0.324225 0.039 Uiso 1 1 calc R U . . .
H39B H 0.368449 0.555632 0.368552 0.039 Uiso 1 1 calc R U . . .
H39C H 0.271781 0.546006 0.371376 0.039 Uiso 1 1 calc R U . . .
 
loop_
 _atom_site_aniso_label
 _atom_site_aniso_U_11
 _atom_site_aniso_U_22
 _atom_site_aniso_U_33
 _atom_site_aniso_U_23
 _atom_site_aniso_U_13
 _atom_site_aniso_U_12
Al1 0.01847(19) 0.01447(18) 0.01384(18) 0.00059(14) 0.00130(14) 0.00171(14)
N1 0.0142(5) 0.0148(5) 0.0151(5) -0.0010(4) -0.0007(4) 0.0005(4)
C1 0.0123(5) 0.0156(6) 0.0175(6) 0.0004(5) -0.0025(4) -0.0010(4)
C2 0.0183(6) 0.0173(6) 0.0127(6) 0.0002(5) -0.0012(5) -0.0008(5)
N2 0.0158(5) 0.0135(5) 0.0146(5) 0.0003(4) -0.0007(4) 0.0010(4)
C3 0.0145(5) 0.0157(6) 0.0140(6) -0.0013(5) -0.0013(4) -0.0015(4)
C5 0.0191(6) 0.0204(6) 0.0224(7) 0.0014(5) -0.0011(5) 0.0011(5)
C4 0.0178(6) 0.0154(6) 0.0157(6) 0.0001(5) -0.0042(5) -0.0010(4)
C6 0.0234(7) 0.0206(6) 0.0303(8) 0.0005(6) -0.0037(6) 0.0061(5)
C7 0.0301(7) 0.0159(6) 0.0273(7) 0.0043(5) -0.0099(6) 0.0001(5)
C8 0.0265(7) 0.0218(7) 0.0233(7) 0.0053(5) -0.0015(5) -0.0040(5)
C9 0.0212(6) 0.0199(6) 0.0215(7) 0.0008(5) 0.0002(5) 0.0007(5)
C10 0.0206(6) 0.0142(6) 0.0143(6) 0.0005(5) 0.0019(5) -0.0001(4)
C11 0.0194(6) 0.0212(6) 0.0157(6) 0.0000(5) 0.0006(5) 0.0000(5)
C12 0.0210(6) 0.0234(6) 0.0229(7) 0.0012(5) 0.0046(5) 0.0032(5)
C13 0.0301(7) 0.0225(7) 0.0187(7) -0.0049(5) 0.0068(5) 0.0012(5)
C14 0.0302(7) 0.0261(7) 0.0163(6) -0.0029(5) -0.0019(5) 0.0002(6)
C15 0.0223(6) 0.0201(6) 0.0178(6) -0.0005(5) -0.0016(5) 0.0026(5)
C16 0.0179(6) 0.0140(6) 0.0150(6) -0.0006(4) -0.0023(5) 0.0016(4)
C17 0.0178(6) 0.0159(6) 0.0175(6) 0.0013(5) -0.0026(5) 0.0010(5)
C18 0.0229(6) 0.0177(6) 0.0226(7) -0.0025(5) -0.0040(5) -0.0022(5)
C19 0.0285(7) 0.0202(6) 0.0219(7) -0.0072(5) -0.0011(5) 0.0026(5)
C20 0.0209(6) 0.0237(7) 0.0212(7) -0.0037(5) 0.0018(5) 0.0029(5)
C21 0.0171(6) 0.0184(6) 0.0166(6) -0.0008(5) -0.0022(5) 0.0012(5)
C22 0.0175(6) 0.0170(6) 0.0127(6) 0.0008(5) 0.0023(5) 0.0035(5)
C23 0.0172(6) 0.0210(6) 0.0147(6) 0.0014(5) 0.0026(5) 0.0018(5)
C24 0.0177(6) 0.0279(7) 0.0211(7) 0.0035(5) -0.0011(5) 0.0058(5)
C25 0.0252(7) 0.0209(7) 0.0266(7) 0.0052(5) 0.0019(6) 0.0092(5)
C26 0.0256(7) 0.0162(6) 0.0247(7) 0.0009(5) 0.0016(5) 0.0023(5)
C27 0.0187(6) 0.0182(6) 0.0160(6) 0.0000(5) 0.0020(5) 0.0025(5)
C28 0.0164(6) 0.0171(6) 0.0235(7) -0.0026(5) -0.0017(5) -0.0009(5)
C29 0.0218(7) 0.0311(8) 0.0335(8) -0.0023(6) -0.0073(6) 0.0037(6)
C30 0.0252(7) 0.0216(7) 0.0360(8) -0.0007(6) 0.0057(6) -0.0035(5)
C31 0.0160(6) 0.0224(6) 0.0201(6) -0.0042(5) 0.0011(5) -0.0002(5)
C32 0.0264(7) 0.0253(7) 0.0268(7) -0.0012(6) 0.0010(6) -0.0033(6)
C33 0.0181(7) 0.0333(8) 0.0305(8) -0.0007(6) -0.0024(6) 0.0002(5)
C34 0.0180(6) 0.0246(7) 0.0193(6) 0.0009(5) -0.0029(5) -0.0002(5)
C35 0.0417(9) 0.0338(8) 0.0234(8) -0.0014(6) -0.0076(7) 0.0010(7)
C36 0.0327(9) 0.0553(11) 0.0407(10) -0.0158(8) 0.0099(7) -0.0203(8)
C37 0.0208(6) 0.0153(6) 0.0205(6) -0.0004(5) -0.0019(5) 0.0008(5)
C38 0.0211(6) 0.0211(6) 0.0280(7) -0.0011(6) -0.0001(5) -0.0012(5)
C39 0.0306(7) 0.0234(7) 0.0239(7) -0.0036(6) -0.0022(6) -0.0002(6)
 
_geom_special_details
;
 All esds (except the esd in the dihedral angle between two l.s. planes)
 are estimated using the full covariance matrix.  The cell esds are taken
 into account individually in the estimation of esds in distances, angles
 and torsion angles; correlations between esds in cell parameters are only
 used when they are defined by crystal symmetry.  An approximate (isotropic)
 treatment of cell esds is used for estimating esds involving l.s. planes.
;
 
loop_
 _geom_bond_atom_site_label_1
 _geom_bond_atom_site_label_2
 _geom_bond_distance
 _geom_bond_site_symmetry_2
 _geom_bond_publ_flag
Al1 N1 1.8979(11) . ?
Al1 N2 1.8991(11) . ?
N1 C1 1.3391(16) . ?
N1 C16 1.4483(15) . ?
C1 C2 1.4051(17) . ?
C1 C4 1.5015(16) . ?
C2 C3 1.4098(17) . ?
N2 C3 1.3338(16) . ?
N2 C22 1.4501(15) . ?
C3 C10 1.4978(17) . ?
C5 C6 1.3897(19) . ?
C5 C4 1.3955(18) . ?
C4 C9 1.3932(18) . ?
C6 C7 1.385(2) . ?
C7 C8 1.383(2) . ?
C8 C9 1.3874(19) . ?
C10 C15 1.3968(18) . ?
C10 C11 1.3991(18) . ?
C11 C12 1.3873(18) . ?
C12 C13 1.382(2) . ?
C13 C14 1.389(2) . ?
C14 C15 1.3874(19) . ?
C16 C21 1.3998(18) . ?
C16 C17 1.4097(17) . ?
C17 C18 1.3938(18) . ?
C17 C28 1.5201(17) . ?
C18 C19 1.383(2) . ?
C19 C20 1.3813(19) . ?
C20 C21 1.3959(18) . ?
C21 C31 1.5222(17) . ?
C22 C27 1.4078(18) . ?
C22 C23 1.4092(18) . ?
C23 C24 1.3952(18) . ?
C23 C34 1.5215(18) . ?
C24 C25 1.381(2) . ?
C25 C26 1.385(2) . ?
C26 C27 1.3944(18) . ?
C27 C37 1.5240(18) . ?
C28 C30 1.5256(18) . ?
C28 C29 1.5288(19) . ?
C31 C33 1.5281(19) . ?
C31 C32 1.5308(19) . ?
C34 C35 1.524(2) . ?
C34 C36 1.530(2) . ?
C37 C39 1.5298(19) . ?
C37 C38 1.5324(19) . ?
 
loop_
 _geom_angle_atom_site_label_1
 _geom_angle_atom_site_label_2
 _geom_angle_atom_site_label_3
 _geom_angle
 _geom_angle_site_symmetry_1
 _geom_angle_site_symmetry_3
 _geom_angle_publ_flag
N1 Al1 N2 96.83(5) . . ?
C1 N1 C16 121.26(10) . . ?
C1 N1 Al1 121.99(8) . . ?
C16 N1 Al1 116.40(8) . . ?
N1 C1 C2 122.25(11) . . ?
N1 C1 C4 121.29(11) . . ?
C2 C1 C4 116.42(11) . . ?
C1 C2 C3 127.86(11) . . ?
C3 N2 C22 122.32(10) . . ?
C3 N2 Al1 121.00(8) . . ?
C22 N2 Al1 114.35(8) . . ?
N2 C3 C2 122.46(11) . . ?
N2 C3 C10 121.53(11) . . ?
C2 C3 C10 116.00(11) . . ?
C6 C5 C4 120.57(13) . . ?
C9 C4 C5 118.18(12) . . ?
C9 C4 C1 119.67(11) . . ?
C5 C4 C1 122.14(11) . . ?
C7 C6 C5 120.41(13) . . ?
C8 C7 C6 119.59(12) . . ?
C7 C8 C9 120.01(13) . . ?
C8 C9 C4 121.17(13) . . ?
C15 C10 C11 118.42(12) . . ?
C15 C10 C3 119.28(11) . . ?
C11 C10 C3 122.30(11) . . ?
C12 C11 C10 120.51(12) . . ?
C13 C12 C11 120.45(12) . . ?
C12 C13 C14 119.77(12) . . ?
C15 C14 C13 119.97(13) . . ?
C14 C15 C10 120.86(12) . . ?
C21 C16 C17 121.61(11) . . ?
C21 C16 N1 119.06(11) . . ?
C17 C16 N1 119.19(11) . . ?
C18 C17 C16 117.79(12) . . ?
C18 C17 C28 119.87(11) . . ?
C16 C17 C28 122.22(11) . . ?
C19 C18 C17 121.33(12) . . ?
C20 C19 C18 119.85(12) . . ?
C19 C20 C21 121.27(12) . . ?
C20 C21 C16 118.03(12) . . ?
C20 C21 C31 119.42(11) . . ?
C16 C21 C31 122.55(11) . . ?
C27 C22 C23 121.66(11) . . ?
C27 C22 N2 119.95(11) . . ?
C23 C22 N2 118.30(11) . . ?
C24 C23 C22 117.76(12) . . ?
C24 C23 C34 119.33(12) . . ?
C22 C23 C34 122.91(11) . . ?
C25 C24 C23 121.46(12) . . ?
C24 C25 C26 119.83(12) . . ?
C25 C26 C27 121.43(13) . . ?
C26 C27 C22 117.78(12) . . ?
C26 C27 C37 119.09(12) . . ?
C22 C27 C37 123.13(11) . . ?
C17 C28 C30 112.52(11) . . ?
C17 C28 C29 109.36(11) . . ?
C30 C28 C29 110.73(11) . . ?
C21 C31 C33 112.24(11) . . ?
C21 C31 C32 110.74(11) . . ?
C33 C31 C32 109.95(11) . . ?
C23 C34 C35 111.11(12) . . ?
C23 C34 C36 112.26(12) . . ?
C35 C34 C36 109.51(13) . . ?
C27 C37 C39 111.94(11) . . ?
C27 C37 C38 111.24(11) . . ?
C39 C37 C38 109.87(11) . . ?
 
_refine_diff_density_max    0.361
_refine_diff_density_min   -0.212
_refine_diff_density_rms    0.047

_shelx_res_file
;
TITL LAlH_a.res in Pbca
    LAlH_a.res
    created by SHELXL-2018/3 at 19:21:24 on 19-May-2019
REM Old TITL
REM SHELXT solution in Pbca: R1 0.114, Rweak 0.006, Alpha 0.024
REM <I/s>   0.692 for  679 systematic absences,  Orientation as input
REM Formula found by SHELXT:  C39 Al N2
CELL  0.71075  16.0206  24.7785  16.9022   90.000   90.000   90.000
ZERR    8.000   0.0003   0.0005   0.0004    0.000    0.000    0.000
LATT  1
SYMM 1/2-X, -Y, 1/2+Z
SYMM -X, 1/2+Y, 1/2-Z
SYMM 1/2+X, 1/2-Y, -Z
SFAC C H AL N
UNIT 312 376 8 16
L.S. 1
BOND
LIST 4
ACTA
OMIT 0 2 1
OMIT 1 1 1
FMAP 2
PLAN 20
WGHT    0.049900    3.154200
FVAR       0.21450
AL1   3    0.312930    0.392112    0.143176    11.00000    0.01847    0.01447 =
         0.01384    0.00059    0.00130    0.00171
H1A   2    0.269986    0.388387    0.057551    11.00000   -1.20000
H1B   2    0.395727    0.426518    0.146145    11.00000   -1.20000
N1    4    0.325825    0.322655    0.188902    11.00000    0.01418    0.01477 =
         0.01512   -0.00105   -0.00071    0.00052
C1    1    0.313898    0.313854    0.266250    11.00000    0.01234    0.01559 =
         0.01749    0.00045   -0.00250   -0.00101
C2    1    0.281558    0.353642    0.316939    11.00000    0.01829    0.01731 =
         0.01268    0.00016   -0.00120   -0.00079
AFIX  43
H2    2    0.286181    0.346762    0.370851    11.00000   -1.20000
AFIX   0
N2    4    0.240217    0.420521    0.221535    11.00000    0.01576    0.01346 =
         0.01459    0.00031   -0.00067    0.00104
C3    1    0.242953    0.402728    0.295966    11.00000    0.01447    0.01574 =
         0.01400   -0.00126   -0.00129   -0.00149
C5    1    0.401378    0.229216    0.281832    11.00000    0.01909    0.02037 =
         0.02242    0.00144   -0.00108    0.00111
AFIX  43
H5    2    0.439477    0.242840    0.245438    11.00000   -1.20000
AFIX   0
C4    1    0.331658    0.259815    0.302754    11.00000    0.01784    0.01535 =
         0.01569    0.00010   -0.00416   -0.00100
C6    1    0.414366    0.178561    0.314912    11.00000    0.02343    0.02064 =
         0.03028    0.00049   -0.00366    0.00607
AFIX  43
H6    2    0.460715    0.158364    0.300051    11.00000   -1.20000
AFIX   0
C7    1    0.358732    0.157976    0.369856    11.00000    0.03010    0.01590 =
         0.02732    0.00434   -0.00989    0.00006
AFIX  43
H7    2    0.366899    0.123723    0.390977    11.00000   -1.20000
AFIX   0
C8    1    0.290939    0.188669    0.393135    11.00000    0.02647    0.02184 =
         0.02333    0.00535   -0.00149   -0.00405
AFIX  43
H8    2    0.254274    0.175509    0.431181    11.00000   -1.20000
AFIX   0
C9    1    0.277617    0.239089    0.359740    11.00000    0.02120    0.01988 =
         0.02152    0.00075    0.00016    0.00073
AFIX  43
H9    2    0.231801    0.259411    0.375677    11.00000   -1.20000
AFIX   0
C10   1    0.204256    0.433929    0.362410    11.00000    0.02056    0.01415 =
         0.01432    0.00055    0.00192   -0.00006
C11   1    0.125108    0.457418    0.356272    11.00000    0.01943    0.02123 =
         0.01570    0.00003    0.00060   -0.00004
AFIX  43
H11   2    0.094150    0.452972    0.310186    11.00000   -1.20000
AFIX   0
C12   1    0.092453    0.487291    0.418406    11.00000    0.02097    0.02340 =
         0.02294    0.00118    0.00460    0.00322
AFIX  43
H12   2    0.039874    0.502855    0.413592    11.00000   -1.20000
AFIX   0
C13   1    0.137518    0.494080    0.487403    11.00000    0.03007    0.02250 =
         0.01870   -0.00494    0.00684    0.00122
AFIX  43
H13   2    0.115707    0.514598    0.528577    11.00000   -1.20000
AFIX   0
C14   1    0.215523    0.470146    0.495045    11.00000    0.03022    0.02614 =
         0.01634   -0.00291   -0.00192    0.00017
AFIX  43
H14   2    0.245688    0.474190    0.541681    11.00000   -1.20000
AFIX   0
C15   1    0.248401    0.440209    0.433075    11.00000    0.02234    0.02014 =
         0.01779   -0.00054   -0.00155    0.00265
AFIX  43
H15   2    0.300511    0.424114    0.438658    11.00000   -1.20000
AFIX   0
C16   1    0.339935    0.278427    0.134500    11.00000    0.01794    0.01396 =
         0.01504   -0.00059   -0.00228    0.00164
C17   1    0.274535    0.241845    0.119104    11.00000    0.01775    0.01590 =
         0.01752    0.00132   -0.00256    0.00097
C18   1    0.289897    0.199978    0.065990    11.00000    0.02288    0.01772 =
         0.02262   -0.00254   -0.00403   -0.00218
AFIX  43
H18   2    0.248117    0.174858    0.055835    11.00000   -1.20000
AFIX   0
C19   1    0.366047    0.195038    0.028073    11.00000    0.02845    0.02024 =
         0.02188   -0.00715   -0.00109    0.00261
AFIX  43
H19   2    0.375487    0.166433   -0.006407    11.00000   -1.20000
AFIX   0
C20   1    0.428024    0.232687    0.041544    11.00000    0.02093    0.02373 =
         0.02118   -0.00368    0.00177    0.00291
AFIX  43
H20   2    0.478533    0.229635    0.014796    11.00000   -1.20000
AFIX   0
C21   1    0.416302    0.275228    0.094533    11.00000    0.01710    0.01844 =
         0.01664   -0.00078   -0.00221    0.00118
C22   1    0.201465    0.471389    0.200313    11.00000    0.01752    0.01700 =
         0.01270    0.00081    0.00233    0.00353
C23   1    0.127282    0.470097    0.155552    11.00000    0.01724    0.02103 =
         0.01468    0.00141    0.00262    0.00177
C24   1    0.090801    0.519308    0.135210    11.00000    0.01770    0.02788 =
         0.02106    0.00354   -0.00106    0.00580
AFIX  43
H24   2    0.041425    0.519439    0.106276    11.00000   -1.20000
AFIX   0
C25   1    0.126399    0.567836    0.157095    11.00000    0.02525    0.02091 =
         0.02661    0.00525    0.00190    0.00922
AFIX  43
H25   2    0.100424    0.600178    0.143929    11.00000   -1.20000
AFIX   0
C26   1    0.200855    0.568203    0.198685    11.00000    0.02557    0.01620 =
         0.02469    0.00090    0.00158    0.00234
AFIX  43
H26   2    0.225052    0.601059    0.212154    11.00000   -1.20000
AFIX   0
C27   1    0.240345    0.520382    0.220814    11.00000    0.01869    0.01818 =
         0.01604   -0.00005    0.00202    0.00250
C28   1    0.187859    0.248874    0.154210    11.00000    0.01637    0.01706 =
         0.02355   -0.00261   -0.00171   -0.00092
AFIX  13
H28   2    0.191473    0.275726    0.196642    11.00000   -1.20000
AFIX   0
C29   1    0.128859    0.270727    0.090751    11.00000    0.02182    0.03105 =
         0.03347   -0.00232   -0.00727    0.00367
AFIX 137
H29A  2    0.150808    0.303872    0.069963    11.00000   -1.50000
H29B  2    0.074938    0.277232    0.113620    11.00000   -1.50000
H29C  2    0.123780    0.244800    0.048821    11.00000   -1.50000
AFIX   0
C30   1    0.153772    0.196700    0.189605    11.00000    0.02517    0.02165 =
         0.03605   -0.00070    0.00570   -0.00351
AFIX 137
H30A  2    0.147075    0.170314    0.148502    11.00000   -1.50000
H30B  2    0.100712    0.203639    0.213960    11.00000   -1.50000
H30C  2    0.192078    0.183315    0.228626    11.00000   -1.50000
AFIX   0
C31   1    0.486304    0.315843    0.107313    11.00000    0.01600    0.02241 =
         0.02011   -0.00421    0.00114   -0.00017
AFIX  13
H31   2    0.468987    0.340543    0.149517    11.00000   -1.20000
AFIX   0
C32   1    0.501058    0.349266    0.032437    11.00000    0.02637    0.02528 =
         0.02679   -0.00123    0.00101   -0.00335
AFIX 137
H32A  2    0.513917    0.325619   -0.010872    11.00000   -1.50000
H32B  2    0.546848    0.373571    0.040959    11.00000   -1.50000
H32C  2    0.451662    0.369567    0.020267    11.00000   -1.50000
AFIX   0
C33   1    0.567604    0.288803    0.133087    11.00000    0.01807    0.03331 =
         0.03051   -0.00071   -0.00240    0.00021
AFIX 137
H33A  2    0.558177    0.268642    0.180758    11.00000   -1.50000
H33B  2    0.609255    0.315898    0.142557    11.00000   -1.50000
H33C  2    0.586456    0.264882    0.092137    11.00000   -1.50000
AFIX   0
C34   1    0.085361    0.417803    0.130117    11.00000    0.01798    0.02457 =
         0.01925    0.00086   -0.00290   -0.00024
AFIX  13
H34   2    0.121421    0.387789    0.146161    11.00000   -1.20000
AFIX   0
C35   1    0.075324    0.415432    0.040518    11.00000    0.04165    0.03381 =
         0.02340   -0.00137   -0.00759    0.00105
AFIX 137
H35A  2    0.039462    0.444201    0.023438    11.00000   -1.50000
H35B  2    0.051201    0.381412    0.025827    11.00000   -1.50000
H35C  2    0.128987    0.419189    0.015851    11.00000   -1.50000
AFIX   0
C36   1    0.000280    0.409929    0.169548    11.00000    0.03268    0.05527 =
         0.04068   -0.01582    0.00994   -0.02034
AFIX 137
H36A  2    0.006951    0.410060    0.225992    11.00000   -1.50000
H36B  2   -0.023098    0.376055    0.153149    11.00000   -1.50000
H36C  2   -0.036406    0.438730    0.154249    11.00000   -1.50000
AFIX   0
C37   1    0.323255    0.523287    0.264813    11.00000    0.02083    0.01529 =
         0.02053   -0.00037   -0.00189    0.00083
AFIX  13
H37   2    0.338130    0.486611    0.281310    11.00000   -1.20000
AFIX   0
C38   1    0.393027    0.544330    0.211011    11.00000    0.02106    0.02106 =
         0.02801   -0.00107   -0.00013   -0.00118
AFIX 137
H38A  2    0.397569    0.521560    0.165260    11.00000   -1.50000
H38B  2    0.444933    0.544101    0.239390    11.00000   -1.50000
H38C  2    0.380289    0.580511    0.194679    11.00000   -1.50000
AFIX   0
C39   1    0.317335    0.558285    0.339165    11.00000    0.03063    0.02340 =
         0.02389   -0.00363   -0.00221   -0.00016
AFIX 137
H39A  2    0.308060    0.595180    0.324225    11.00000   -1.50000
H39B  2    0.368449    0.555632    0.368552    11.00000   -1.50000
H39C  2    0.271781    0.546006    0.371376    11.00000   -1.50000
AFIX   0
HKLF 4


REM  LAlH_a.res in Pbca
REM wR2 = 0.1055, GooF = S = 1.048, Restrained GooF = 1.048 for all data
REM R1 = 0.0428 for 6542 Fo > 4sig(Fo) and 0.0535 for all 7680 data
REM 393 parameters refined using 0 restraints

END

WGHT      0.0499      3.1539

REM Highest difference peak  0.361,  deepest hole -0.212,  1-sigma level  0.047
Q1    1   0.0367  0.3906  0.1953  11.00000  0.05    0.36
Q2    1   0.2220  0.4193  0.3296  11.00000  0.05    0.33
Q3    1   0.3244  0.2872  0.2863  11.00000  0.05    0.33
Q4    1   0.3204  0.3535  0.1694  11.00000  0.05    0.33
Q5    1   0.2811  0.5227  0.2416  11.00000  0.05    0.31
Q6    1   0.3213  0.5407  0.3016  11.00000  0.05    0.30
Q7    1   0.2318  0.2443  0.1381  11.00000  0.05    0.29
Q8    1   0.3055  0.2624  0.1240  11.00000  0.05    0.29
Q9    1   0.1602  0.4697  0.1811  11.00000  0.05    0.29
Q10   1   0.1744  0.2222  0.1671  11.00000  0.05    0.29
Q11   1   0.2602  0.4048  0.1845  11.00000  0.05    0.28
Q12   1   0.2984  0.2464  0.3255  11.00000  0.05    0.28
Q13   1   0.1175  0.4952  0.1360  11.00000  0.05    0.28
Q14   1   0.1068  0.4445  0.1423  11.00000  0.05    0.28
Q15   1   0.2247  0.5431  0.1976  11.00000  0.05    0.28
Q16   1   0.3848  0.2716  0.1250  11.00000  0.05    0.28
Q17   1   0.1615  0.2603  0.1205  11.00000  0.05    0.27
Q18   1   0.3013  0.3369  0.2898  11.00000  0.05    0.27
Q19   1   0.1631  0.4418  0.3628  11.00000  0.05    0.27
Q20   1   0.0412  0.4181  0.1444  11.00000  0.05    0.27
;
_shelx_res_checksum   52450

_shelx_hkl_file
;
   0   3   0    0.25    1.19
   0  -3   0    1.09    0.60
   0  -3   0    1.26    0.44
   0   3   0    0.95    0.37
   0   4   0 7907.31  507.62
   0  -4   0 8321.52  537.54
   0  -4   0 7235.99  450.29
   0   4   0 7406.96  460.81
   0   5   0   -1.02    1.27
   0  -5   0    0.75    1.22
   0  -5   0    0.66    0.85
   0   5   0    0.87    0.85
   0   6   0 1415.52   37.06
   0  -6   0 1422.76   36.50
   0  -6   0 1437.57   31.72
   0   6   0 1530.27   33.74
   0   7   0   -0.25    1.36
   0  -7   0   -0.04    1.28
   0  -7   0    0.26    1.12
   0   7   0    0.11    0.83
   0   8   0  842.67   18.83
   0  -8   0  836.37   18.28
   0  -8   0  870.49   15.81
   0   8   0  853.79   15.21
   0   9   0    0.50    1.38
   0  -9   0    1.71    1.29
   0  -9   0    0.61    1.04
   0   9   0    0.46    0.81
   0  10   0   16.22    2.50
   0 -10   0   14.89    2.35
   0 -10   0   14.66    0.88
   0  10   0   14.19    0.90
   0  11   0   -0.37    1.49
   0 -11   0    0.77    1.36
   0 -11   0   -1.55    0.79
   0  11   0   -0.06    0.80
   0  12   0  733.00   16.33
   0 -12   0  717.55   14.47
   0 -12   0  732.95   13.63
   0  12   0  720.55   12.76
   0  13   0   -0.78    1.51
   0 -13   0    0.74    2.30
   0 -13   0    0.93    0.78
   0  13   0   -0.03    0.85
   0  14   0  525.95   10.24
   0 -14   0  497.08    9.69
   0 -14   0  501.39    8.04
   0  14   0  514.46    8.34
   0  15   0   -0.78    2.53
   0 -15   0   -0.45    2.43
   0  15   0   -0.87    0.82
   0  16   0    1.51    1.60
   0 -16   0    0.72    1.60
   0 -16   0    1.46    1.00
   0  16   0    1.30    1.07
   0  17   0    4.19    2.60
   0 -17   0   -0.06    0.86
   0  18   0   92.45    2.85
   0  18   0   94.97    2.96
   0 -18   0   93.43    1.86
   0 -18   0   96.86    1.76
   0  19   0    1.39    2.88
   0  19   0    0.04    3.03
   0 -19   0   -0.37    0.87
   0 -19   0    0.25    0.87
   0  20   0   38.80    3.56
   0  20   0   39.39    2.35
   0 -20   0   36.52    1.58
   0 -20   0   37.99    1.58
   0  21   0    1.02    1.97
   0  21   0   -1.22    3.20
   0 -21   0    0.21    0.88
   0 -21   0    2.65    1.09
   0  22   0   47.47    4.07
   0  22   0   55.14    2.76
   0 -22   0   48.79    1.40
   0 -22   0   53.63    1.67
   0  23   0    3.30    2.23
   0  23   0    7.20    3.57
   0 -23   0    4.57    0.94
   0 -23   0    7.70    1.09
   0  24   0  673.06   18.33
   0  24   0  657.06   15.67
   0 -24   0  669.74   11.99
   0 -24   0  701.24   12.33
   0  25   0    2.82    2.42
   0  25   0   -3.45    3.84
   0 -25   0    3.61    1.09
   0  26   0   70.26    5.04
   0  26   0   73.13    5.12
   0 -26   0   64.96    1.69
   0 -26   0   71.52    1.37
   0  27   0   -0.88    2.48
   0  27   0   -0.54    2.32
   0 -27   0    0.73    0.63
   0 -27   0    0.24    0.80
   0  28   0   13.73    4.49
   0  28   0   17.90    4.34
   0  29   0    2.20    2.63
   0  29   0   -3.22    2.59
   0  30   0    1.83    4.43
   0  30   0    4.79    4.37
   0  31   0    0.46    2.84
   0  31   0    1.47    2.92
   0  32   0    5.16    4.86
   0  32   0    1.18    4.81
   0   2  -1   -0.47    0.36
   0  -2  -1   -1.65    0.61
   0   2   1   -0.17    0.26
   0  -3   1    2.45    1.20
   0   3  -1    1.77    1.26
   0   3   1    1.94    1.29
   0  -3  -1    2.02    1.29
   0   3  -1    0.58    0.43
   0  -3  -1    0.72    0.49
   0  -4   1  172.84    2.71
   0   4  -1  163.97    2.61
   0   4   1  173.14    3.72
   0  -4  -1  168.62    2.23
   0   4   1  167.65    2.21
   0   5  -1    0.38    2.16
   0   5   1    1.56    1.28
   0  -5  -1    0.50    2.20
   0   5  -1    1.07    1.32
   0  -5  -1    0.06    1.24
   0   5   1    0.97    1.22
   0  -5   1    1.28    0.75
   0   6  -1  647.73   13.59
   0   6   1  666.67   12.57
   0  -6  -1  690.42   14.35
   0   6  -1  686.39   14.45
   0  -6   1  703.46   10.90
   0  -6  -1  677.46   11.87
   0   6   1  676.67   11.08
   0  -6   1  729.88   11.56
   0   7  -1   -0.70    1.21
   0   7   1   -0.90    2.25
   0  -7  -1    0.80    1.26
   0   7  -1    0.67    1.33
   0  -7   1   -0.51    0.59
   0  -7  -1   -0.15    1.08
   0   7   1   -0.14    1.11
   0  -7   1    0.32    0.74
   0   8  -1 1329.31   33.84
   0   8   1 1346.13   32.49
   0  -8  -1 1326.26   32.21
   0   8  -1 1347.02   34.58
   0  -8   1 1468.69   31.18
   0  -8  -1 1427.34   32.11
   0   8   1 1387.86   31.30
   0  -8   1 1449.53   30.87
   0   9  -1    0.74    2.08
   0   9   1    0.17    1.35
   0  -9  -1    0.53    1.31
   0   9  -1    0.35    2.28
   0  -9   1   -0.34    0.83
   0  -9  -1    1.26    0.99
   0  -9   1    0.52    0.55
   0   9   1    0.34    1.06
   0  10  -1    5.50    2.16
   0  10   1    3.13    1.39
   0 -10  -1    3.50    1.33
   0  10  -1    4.48    1.42
   0 -10   1    3.76    0.63
   0 -10  -1    3.61    1.00
   0 -10   1    3.22    0.78
   0  10   1    3.70    1.05
   0  11  -1   -0.97    2.17
   0  11   1    0.07    1.41
   0  11  -1   -0.45    1.46
   0 -11  -1    0.96    1.33
   0 -11   1    0.50    0.84
   0 -11  -1   -1.01    0.99
   0 -11   1   -0.35    0.80
   0  11   1   -0.15    1.02
   0  12  -1   71.91    3.08
   0  12   1   72.62    2.25
   0  12  -1   72.86    2.27
   0 -12  -1   72.44    3.15
   0 -12   1   71.56    1.53
   0  12   1   71.35    1.71
   0  13  -1    0.91    1.38
   0  13   1   -2.59    1.47
   0  13  -1   -2.05    2.46
   0 -13  -1   -2.58    2.31
   0 -13   1   -0.81    0.63
   0 -13  -1   -1.43    0.95
   0 -13   1   -0.69    0.59
   0  13   1   -0.44    0.99
   0  14  -1  155.17    3.34
   0  14   1  155.32    4.65
   0  14  -1  157.50    3.55
   0 -14  -1  158.44    3.43
   0 -14   1  152.46    2.24
   0 -14  -1  152.18    2.76
   0 -14   1  157.43    2.25
   0  14   1  158.08    2.75
   0  15  -1    1.92    2.29
   0  15   1    1.67    2.44
   0  15  -1    0.13    1.55
   0 -15  -1   -0.51    2.40
   0 -15   1   -0.53    0.83
   0 -15  -1   -0.35    0.89
   0 -15   1    0.06    0.75
   0  15   1    0.22    0.97
   0  16  -1   37.84    3.00
   0  16   1   41.33    2.08
   0  16  -1   41.69    3.16
   0 -16  -1   41.29    3.08
   0 -16   1   39.81    1.22
   0 -16  -1   39.60    1.35
   0 -16   1   40.60    0.93
   0  16   1   39.30    1.38
   0  17  -1   -0.54    1.58
   0  17   1    1.31    1.65
   0  17  -1    0.06    1.72
   0 -17  -1   -1.21    1.61
   0 -17   1   -0.91    0.85
   0 -17  -1    0.70    1.08
   0 -17   1   -0.12    0.68
   0  17   1   -0.98    0.99
   0  18  -1  130.15    3.43
   0  18   1  132.93    4.68
   0  18  -1  134.73    4.91
   0 -18  -1  132.86    4.79
   0 -18   1  133.06    2.08
   0 -18  -1  136.58    2.52
   0 -18   1  132.54    2.19
   0  18   1  128.46    2.50
   0  19  -1   -0.48    2.84
   0  19   1    1.77    1.84
   0  19  -1    0.63    1.86
   0 -19  -1    0.42    1.84
   0 -19   1    0.18    0.69
   0 -19  -1   -1.59    1.10
   0 -19   1   -0.12    0.69
   0  19   1    0.82    1.05
   0  20  -1   17.26    2.18
   0  20   1   22.18    2.13
   0  20  -1   24.10    3.45
   0 -20  -1   22.45    3.45
   0 -20   1   20.89    0.86
   0 -20   1   21.46    0.86
   0 -20  -1   19.53    1.34
   0  20   1   20.51    1.26
   0  21  -1    2.87    2.01
   0  21   1    2.96    3.25
   0  21  -1    4.38    3.29
   0 -21   1    6.17    0.81
   0 -21  -1    6.29    1.41
   0  22   1   56.64    2.81
   0  22  -1   55.57    2.87
   0 -22   1   55.07    1.36
   0 -22   1   56.20    1.13
   0 -22  -1   55.67    1.66
   0  23   1   -2.33    3.40
   0  23  -1   -0.94    2.14
   0  23   1   -1.81    3.39
   0  23  -1   -2.54    3.43
   0 -23   1    0.11    0.74
   0  24   1   34.32    2.70
   0  24  -1   36.50    4.25
   0  24   1   42.50    4.19
   0  24  -1   36.44    2.78
   0 -24  -1   33.71    1.91
   0 -24   1   34.58    0.96
   0 -24  -1   38.14    2.01
   0  25   1    2.41    3.65
   0  25  -1   -1.69    3.73
   0  25   1    4.28    2.30
   0  25  -1    0.28    3.80
   0 -25  -1    2.45    1.14
   0 -25   1   -0.10    0.53
   0 -25   1    1.12    0.39
   0 -25  -1    0.38    1.10
   0  26   1  152.84    4.77
   0  26  -1  152.78    4.83
   0  26   1  159.53    6.80
   0  26  -1  158.85    4.93
   0 -26  -1  168.51    3.39
   0  27   1    3.44    3.93
   0  27  -1    7.85    4.07
   0  27   1    5.56    2.51
   0  27  -1    9.90    3.97
   0  28   1   61.61    3.53
   0  28  -1   65.28    3.55
   0  28   1   72.96    5.21
   0  28  -1   57.89    3.51
   0  29   1   -0.93    4.21
   0  29  -1    5.15    4.24
   0  29   1    0.04    2.62
   0  29  -1    2.90    4.16
   0  30   1   53.18    3.58
   0  30  -1   53.01    3.52
   0  30   1   54.68    5.37
   0  30  -1   58.54    3.66
   0  31   1    1.85    4.52
   0  31  -1   -0.28    4.64
   0  31   1   -5.25    4.69
   0  31  -1    0.93    4.72
   0  32   1    3.19    3.09
   0  32  -1    8.30    4.88
   0  32   1    1.73    3.08
   0  32  -1    3.82    4.91
   0   0   2 4231.45  172.64
   0   0  -2 4074.21  165.20
   0  -1   2    0.80    0.60
   0   1  -2    2.23    1.10
   0   1   2    1.04    0.69
   0   1  -2    0.92    0.72
   0  -1   2    2.00    0.84
   0  -1  -2    1.48    0.96
   0   1   2    1.34    0.59
   0  -2   2  334.08    5.46
   0   2   2  338.00    5.65
   0  -2   2  340.09    4.69
   0  -2  -2  326.06    4.57
   0   2   2  354.69    4.90
   0  -3   2    0.92    0.92
   0   3  -2    2.11    1.76
   0   3   2    0.24    1.72
   0  -3  -2    1.33    1.07
   0   3  -2    0.45    0.64
   0  -3   2    1.20    0.72
   0  -3  -2    0.02    1.33
   0   3   2    2.64    1.43
   0  -4   2    5.25    2.09
   0   4  -2    4.47    1.25
   0   4   2    5.72    2.24
   0  -4  -2    4.99    1.27
   0   4  -2    4.86    0.97
   0  -4   2    4.53    0.73
   0  -4  -2    3.49    1.65
   0   4   2    4.65    0.95
   0  -5   2    4.24    2.31
   0   5  -2    3.42    2.32
   0   5   2    0.15    1.42
   0  -5  -2    2.70    2.33
   0   5  -2    0.69    0.63
   0  -5   2    1.73    0.65
   0  -5  -2    1.17    0.95
   0   5   2    0.97    0.95
   0  -6   2  458.00    7.86
   0   6  -2  461.71    9.22
   0   6   2  453.71    7.98
   0  -6  -2  454.21    7.87
   0   6  -2  460.02    6.71
   0  -6   2  459.57    6.27
   0  -6  -2  440.37    6.82
   0   6   2  453.17    7.91
   0  -7   2    0.37    1.23
   0   7  -2   -2.59    2.08
   0   7   2    0.72    2.15
   0  -7  -2   -0.84    1.26
   0   7  -2   -0.49    0.69
   0  -7   2    0.55    0.64
   0  -7  -2   -0.09    1.31
   0   7   2    0.13    1.33
   0   8  -2  358.61    7.34
   0   8   2  355.46    7.49
   0  -8  -2  352.72    6.19
   0   8  -2  366.57    7.66
   0  -8   2  361.40    4.85
   0  -8  -2  348.55    5.79
   0   8   2  345.34    5.23
   0  -8   2  352.59    4.64
   0   9  -2   -0.21    1.28
   0   9   2    0.69    1.32
   0  -9  -2    1.65    2.15
   0   9  -2   -0.26    1.35
   0  -9   2    0.61    0.62
   0  -9  -2   -0.40    0.73
   0   9   2    0.86    1.24
   0  -9   2   -0.14    0.63
   0  10  -2   52.76    2.89
   0  10   2   57.42    3.00
   0 -10  -2   55.47    1.97
   0  10  -2   57.36    1.98
   0 -10   2   55.76    1.07
   0 -10  -2   53.41    1.70
   0  10   2   54.48    1.79
   0 -10   2   55.19    1.06
   0  11  -2    0.23    2.24
   0  11   2    0.76    1.39
   0 -11  -2   -0.03    1.37
   0  11  -2    0.81    2.33
   0 -11   2   -0.52    0.62
   0  11   2    1.14    1.20
   0 -11   2   -0.25    0.61
   0  12  -2   47.25    1.90
   0  12   2   49.21    1.94
   0 -12  -2   49.51    1.93
   0  12  -2   47.85    2.98
   0 -12   2   48.08    1.03
   0 -12   2   51.08    1.14
   0  12   2   49.69    1.69
   0  13  -2   -1.70    1.42
   0  13   2    0.84    2.32
   0 -13  -2   -0.07    1.45
   0  13  -2    0.13    2.43
   0 -13   2    0.07    0.62
   0 -13  -2   -1.38    1.21
   0 -13   2   -1.19    0.61
   0  13   2   -0.54    1.16
   0  14  -2  427.12    8.22
   0  14   2  443.24    9.86
   0  14  -2  444.16    8.49
   0 -14  -2  429.22    8.39
   0 -14   2  440.08    6.15
   0 -14  -2  426.65    7.37
   0 -14   2  447.28    6.32
   0  14   2  428.24    7.48
   0  15  -2    0.92    1.45
   0  15   2    0.62    2.46
   0  15  -2    2.25    1.58
   0 -15  -2    1.36    1.49
   0 -15   2   -0.82    0.62
   0 -15  -2   -0.64    0.71
   0 -15   2    1.04    0.56
   0  15   2   -0.51    1.17
   0  16  -2   19.92    1.75
   0  16   2   17.37    1.80
   0  16  -2   21.30    1.85
   0 -16  -2   17.34    2.78
   0 -16   2   20.09    0.77
   0 -16  -2   18.28    1.32
   0 -16   2   19.69    0.70
   0  16   2   19.83    1.39
   0  17  -2    2.49    2.69
   0  17   2    0.38    1.66
   0  17  -2   -1.74    2.75
   0 -17  -2   -0.08    2.62
   0 -17   2    0.10    0.59
   0  17   2    1.62    1.19
   0  18  -2   55.92    3.62
   0  18   2   61.47    2.48
   0  18  -2   61.58    3.85
   0 -18  -2   63.11    3.70
   0 -18   2   60.56    1.14
   0 -18  -2   62.05    1.87
   0 -18   2   60.91    1.10
   0  18   2   60.87    1.90
   0  19  -2    1.26    2.96
   0  19   2    1.90    3.06
   0  19  -2    1.67    1.88
   0 -19  -2   -0.19    1.89
   0 -19   2   -0.78    0.57
   0 -19   2   -0.80    0.47
   0 -19  -2   -2.47    1.38
   0  19   2    0.24    1.27
   0  20  -2   70.34    2.86
   0  20   2   71.58    4.15
   0  20  -2   73.40    4.36
   0 -20  -2   72.49    4.33
   0 -20   2   73.95    1.18
   0 -20   2   70.77    1.17
   0 -20  -2   70.24    2.09
   0  20   2   71.77    2.11
   0  21  -2   -0.62    2.06
   0  21   2    2.83    1.93
   0  21  -2    1.20    3.30
   0 -21  -2   -0.87    3.28
   0 -21   2    0.53    0.45
   0  21   2    0.75    1.27
   0  22  -2    4.26    3.51
   0  22   2    8.72    2.15
   0  22  -2    8.09    2.26
   0 -22  -2    9.05    2.16
   0 -22  -2    6.63    1.41
   0  22   2    6.40    1.32
   0  23  -2    0.07    2.10
   0  23   2    3.95    3.50
   0  23  -2    1.31    3.52
   0 -23  -2   -0.67    3.49
   0 -23  -2   -1.70    1.56
   0  23   2    2.11    1.30
   0  24  -2   39.60    2.84
   0  24   2   38.92    4.13
   0  24  -2   39.78    2.79
   0 -24  -2   39.33    2.89
   0 -24  -2   38.82    1.88
   0  24   2   40.27    1.78
   0  25  -2    4.11    3.75
   0  25   2    2.75    2.26
   0  25  -2    3.16    2.35
   0 -25  -2    1.36    1.21
   0  26   2   40.21    4.53
   0  26  -2   42.95    2.96
   0  26   2   38.65    4.49
   0  26  -2   41.09    4.69
   0 -26  -2   35.23    1.81
   0 -26  -2   40.91    1.68
   0  27   2    0.15    2.46
   0  27  -2    2.24    2.58
   0  27   2    1.15    3.95
   0  27  -2   -0.69    2.46
   0 -27  -2    1.09    1.32
   0 -27  -2    1.76    1.31
   0  28   2   43.58    4.94
   0  28  -2   50.85    5.16
   0  28   2   43.51    3.14
   0  28  -2   48.34    4.96
   0 -28  -2   48.60    1.86
   0  29   2    0.48    2.63
   0  29  -2   -0.54    2.65
   0  29   2    2.65    4.13
   0  29  -2    1.16    2.74
   0  30   2   13.47    4.57
   0  30  -2   14.94    4.61
   0  30   2    9.06    2.83
   0  30  -2    7.67    4.73
   0  31   2    5.30    4.55
   0  31  -2    1.21    4.68
   0  31   2    3.01    2.92
   0  31  -2    3.52    4.66
   0  32   2    1.51    3.10
   0  32  -2    5.68    2.97
   0   0   3    0.74    1.08
   0   0  -3    2.26    1.17
   0   0  -3    1.85    0.91
   0   0   3    1.43    0.86
   0  -1   3    0.67    1.06
   0   1  -3   -0.37    1.09
   0   1   3    0.38    1.87
   0  -1  -3   -0.60    1.16
   0   1  -3   -0.63    0.85
   0  -1  -3    0.32    1.01
   0  -1   3    1.03    0.82
   0   1   3   -0.32    1.78
   0  -2   3  591.45   11.53
   0   2  -3  594.79   11.65
   0   2   3  593.73   10.33
   0  -2  -3  607.58   10.53
   0   2  -3  589.00    9.29
   0  -2   3  596.07   10.28
   0  -2  -3  585.14   11.17
   0   2   3  588.82   11.12
   0  -3   3    1.01    2.28
   0   3  -3    1.80    1.34
   0   3   3    1.30    1.35
   0  -3  -3    2.31    2.29
   0   3  -3    0.45    1.23
   0  -3   3    1.69    1.31
   0  -3  -3    0.53    2.01
   0   3   3    0.43    1.14
   0  -4   3 1273.76   30.77
   0   4  -3 1294.45   31.35
   0   4   3 1256.34   28.84
   0  -4  -3 1266.18   28.94
   0   4  -3 1229.74   26.09
   0  -4   3 1309.21   27.93
   0  -4  -3 1313.71   28.84
   0   4   3 1254.80   29.36
   0  -5   3    0.93    2.28
   0   5  -3    1.96    1.30
   0   5   3    0.24    1.35
   0  -5  -3   -0.14    2.26
   0   5  -3    0.79    0.82
   0  -5   3    0.77    0.90
   0  -5  -3    1.04    1.80
   0   5   3    0.30    1.06
   0  -6   3  495.11    9.85
   0   6  -3  477.30    8.30
   0   6   3  502.65   10.14
   0  -6  -3  483.93    8.51
   0   6  -3  486.87    7.26
   0  -6   3  494.21    7.22
   0  -6  -3  481.18    7.85
   0   6   3  478.97    8.78
   0  -7   3   -2.66    2.10
   0   7  -3   -1.70    2.10
   0   7   3    1.67    1.32
   0  -7  -3    1.28    2.13
   0   7  -3   -0.08    0.62
   0  -7   3    0.01    0.63
   0  -7  -3    1.33    1.53
   0   7   3    1.05    0.92
   0  -8   3   28.49    2.45
   0   8  -3   28.68    1.58
   0   8   3   27.93    2.60
   0  -8  -3   29.42    2.47
   0   8  -3   26.84    1.02
   0  -8   3   27.23    0.72
   0  -8  -3   29.09    1.76
   0   8   3   28.35    1.83
   0  -9   3    0.15    2.14
   0   9  -3   -0.36    1.31
   0   9   3   -0.84    2.23
   0  -9  -3   -2.08    2.20
   0   9  -3   -0.55    0.53
   0  -9   3   -0.20    0.63
   0  -9  -3   -0.33    1.48
   0   9   3   -0.79    1.49
   0  10  -3  573.16   12.34
   0  10   3  610.46   12.98
   0 -10  -3  603.44   11.49
   0 -10   3  596.47    8.72
   0 -10  -3  579.70    9.98
   0  10   3  579.16   10.00
   0 -10   3  582.07    8.83
   0  11  -3   -0.25    1.39
   0  11   3    0.43    1.39
   0 -11  -3    1.01    2.34
   0  11  -3    0.25    1.42
   0 -11   3   -1.18    0.75
   0 -11   3    0.39    0.44
   0  12  -3  134.93    4.10
   0  12   3  132.41    4.10
   0 -12  -3  126.54    3.00
   0  12  -3  128.05    4.11
   0 -12   3  127.29    1.72
   0  12   3  126.54    2.97
   0 -12   3  129.50    1.77
   0  13  -3   -1.31    1.43
   0  13   3   -0.98    1.42
   0 -13  -3   -0.26    1.45
   0  13  -3    1.35    2.43
   0 -13   3    1.23    0.49
   0  13   3    0.44    1.38
   0 -13   3    0.17    0.49
   0  14  -3   40.80    1.92
   0  14   3   41.06    1.93
   0 -14  -3   41.83    2.98
   0  14  -3   42.75    3.08
   0 -14   3   40.86    0.66
   0 -14  -3   41.12    1.75
   0 -14   3   42.47    0.78
   0  14   3   40.65    1.22
   0  15  -3    2.62    1.50
   0  15   3    0.56    2.43
   0 -15  -3   -2.90    2.49
   0  15  -3    2.57    2.54
   0 -15   3   -0.25    0.40
   0 -15  -3    0.26    0.78
   0 -15   3    0.05    0.41
   0  15   3    0.97    1.34
   0  16  -3    5.52    1.64
   0  16   3    4.81    2.67
   0 -16  -3    6.15    2.73
   0  16  -3    7.23    2.70
   0 -16   3    5.63    0.41
   0 -16  -3    5.97    1.48
   0 -16   3    5.53    0.40
   0  16   3    5.20    1.44
   0  17  -3    0.46    1.71
   0  17   3    0.77    2.73
   0 -17  -3    2.54    1.67
   0  17  -3    0.24    2.78
   0 -17  -3    1.88    1.53
   0  17   3   -0.28    0.87
   0  18  -3    0.55    1.81
   0  18   3    4.86    2.77
   0  18  -3    0.07    1.93
   0 -18  -3   -1.13    1.77
   0 -18   3    0.67    0.26
   0 -18  -3   -0.20    1.41
   0 -18   3    0.76    0.30
   0  18   3    1.13    1.42
   0  19  -3   -2.10    1.95
   0  19   3    5.21    2.92
   0  19  -3    2.42    1.96
   0 -19  -3    3.44    1.89
   0 -19  -3    6.05    1.67
   0  19   3    0.25    1.43
   0  20  -3  255.66    5.97
   0  20   3  261.21    5.88
   0  20  -3  259.90    7.69
   0 -20  -3  264.48    7.69
   0 -20  -3  258.74    5.05
   0  20   3  264.09    5.16
   0  21  -3   -0.29    3.39
   0  21   3    1.68    1.94
   0  21  -3   -1.14    3.46
   0 -21  -3    1.75    3.30
   0 -21  -3   -1.19    1.80
   0  21   3    0.49    0.91
   0  22  -3   14.12    3.71
   0  22   3   14.24    2.20
   0  22  -3   12.98    2.31
   0 -22  -3   13.52    2.36
   0  22   3   14.46    1.64
   0  23  -3    1.25    3.47
   0  23   3   -1.66    3.32
   0  23  -3    5.91    2.20
   0 -23  -3    2.82    2.23
   0  23   3    1.31    1.49
   0  24  -3   69.96    3.28
   0  24   3   69.84    4.61
   0  24  -3   72.97    4.91
   0 -24  -3   74.44    4.93
   0 -24  -3   73.94    2.51
   0  24   3   71.70    2.39
   0  25  -3   -0.55    2.40
   0  25   3    0.68    2.28
   0  25  -3   -1.08    2.40
   0 -25  -3    0.60    3.73
   0 -25  -3    2.13    1.48
   0  25   3   -0.43    1.49
   0  26  -3   90.37    5.49
   0  26   3   93.11    3.68
   0  26  -3   89.52    3.80
   0 -26  -3   86.39    3.84
   0 -26  -3   94.61    2.60
   0  26   3   93.48    2.85
   0  27  -3    1.87    4.13
   0  27   3   -0.28    3.87
   0  27  -3   -1.15    3.95
   0 -27  -3    2.35    1.64
   0  28   3   38.49    3.13
   0  28  -3   35.89    3.25
   0  28   3   40.60    4.68
   0  28  -3   38.61    3.14
   0 -28  -3   33.17    2.16
   0 -28  -3   41.88    2.04
   0  29   3   -2.97    4.29
   0  29  -3    2.45    4.40
   0  29   3    2.47    2.58
   0  29  -3    1.98    4.22
   0  30   3    6.01    4.46
   0  30  -3    1.75    4.62
   0  30   3    4.52    4.43
   0  30  -3    0.01    5.29
   0  31   3    3.80    2.81
   0  31  -3   -1.50    3.01
   0  31   3    5.95    4.55
   0  31  -3   -1.12    3.00
   0   0   4 4275.30  188.23
   0   0  -4 4172.88  185.87
   0   0  -4 4149.50  180.62
   0   0   4 4131.82  180.08
   0  -1   4    0.03    1.36
   0   1  -4   -0.84    1.35
   0   1   4    0.96    1.39
   0  -1  -4   -0.39    1.36
   0   1  -4    0.28    1.13
   0  -1  -4   -0.96    1.28
   0   1   4    2.30    1.24
   0  -2   4 1072.92   25.40
   0   2  -4 1127.81   26.52
   0   2   4 1117.89   26.68
   0  -2  -4 1109.41   24.42
   0   2  -4 1192.28   25.85
   0  -2   4 1182.11   24.47
   0  -2  -4 1133.56   24.24
   0   2   4 1152.62   24.55
   0  -3   4    2.30    2.32
   0   3  -4    1.53    1.36
   0   3   4    1.28    2.27
   0  -3  -4   -0.40    2.27
   0   3  -4    3.17    0.87
   0  -3   4    3.95    1.63
   0  -3  -4    1.02    1.29
   0   3   4   -1.49    2.07
   0  -4   4    5.18    1.31
   0   4  -4    3.56    1.34
   0   4   4    4.66    1.36
   0  -4  -4    7.28    2.25
   0   4  -4    5.22    1.22
   0  -4   4    3.37    1.33
   0  -4  -4    4.33    1.99
   0   4   4    4.57    1.95
   0  -5   4   -0.51    1.25
   0   5  -4   -1.29    1.28
   0   5   4    0.15    1.30
   0  -5  -4    1.09    1.26
   0   5  -4   -0.65    1.03
   0  -5   4    0.50    1.07
   0  -5  -4   -0.30    1.10
   0   5   4   -0.29    1.11
   0  -6   4 1574.05   39.38
   0   6  -4 1500.48   38.27
   0   6   4 1531.51   40.84
   0  -6  -4 1495.75   38.64
   0   6  -4 1644.91   38.95
   0  -6   4 1647.53   38.58
   0  -6  -4 1525.77   39.14
   0   6   4 1569.29   38.53
   0  -7   4   -1.69    2.11
   0   7  -4    0.72    2.18
   0   7   4    2.02    2.23
   0  -7  -4    0.50    2.21
   0   7  -4    0.42    0.80
   0  -7   4    0.61    0.80
   0  -7  -4    1.15    1.75
   0   7   4   -0.79    1.73
   0  -8   4    0.38    2.18
   0   8  -4    0.10    1.29
   0   8   4    0.38    1.34
   0  -8  -4   -0.16    1.32
   0   8  -4    0.56    0.72
   0  -8   4    0.53    0.69
   0  -8  -4   -0.49    1.04
   0   8   4    1.31    1.72
   0  -9   4    1.50    1.33
   0   9  -4    0.01    1.22
   0   9   4   -3.25    2.28
   0  -9  -4   -0.93    1.37
   0   9  -4    0.23    0.87
   0  -9   4    0.52    0.61
   0  -9  -4    0.07    1.03
   0   9   4    0.70    1.03
   0 -10   4   74.31    2.17
   0  10  -4   72.76    2.19
   0  10   4   82.19    3.48
   0 -10  -4   77.76    2.27
   0  10  -4   77.57    1.52
   0  10   4   74.50    1.86
   0 -11   4   -3.17    2.22
   0  11  -4    0.09    1.44
   0  11   4   -0.05    2.35
   0 -11  -4    0.93    2.30
   0  11  -4   -0.29    0.72
   0 -11  -4    0.14    2.83
   0  12  -4    0.55    2.33
   0  12   4    1.71    1.43
   0 -12  -4    2.73    1.40
   0  12   4    0.08    1.55
   0  13  -4    0.74    1.45
   0  13   4   -1.42    2.39
   0 -13  -4   -1.15    2.34
   0  13  -4   -1.09    1.49
   0 -13  -4   -2.28    0.98
   0  13   4   -0.67    1.54
   0 -13   4   -0.59    0.55
   0  14  -4   43.69    1.97
   0  14   4   43.62    2.03
   0 -14  -4   45.57    3.04
   0  14  -4   44.09    2.02
   0 -14   4   43.22    0.79
   0 -14  -4   42.09    1.96
   0  14   4   43.34    1.40
   0 -14   4   43.08    0.81
   0  15  -4    0.37    2.52
   0  15   4   -0.39    2.49
   0 -15  -4    2.65    1.54
   0  15  -4   -0.68    1.58
   0 -15   4   -0.04    0.38
   0 -15  -4    0.75    1.49
   0 -15   4    0.00    0.36
   0  15   4   -1.24    0.94
   0  16  -4   21.58    2.98
   0  16   4   22.86    2.85
   0 -16  -4   21.01    1.92
   0  16  -4   21.99    1.91
   0 -16   4   20.85    0.50
   0 -16  -4   21.67    1.90
   0  16   4   20.97    1.74
   0  17  -4   -3.16    1.77
   0  17   4    2.54    2.74
   0 -17  -4    0.79    1.75
   0  17  -4   -1.05    1.74
   0 -17  -4   -2.09    1.60
   0  17   4    0.64    1.55
   0  18  -4  313.30    6.76
   0  18   4  317.76    6.72
   0 -18  -4  318.46    6.94
   0  18  -4  309.24    6.62
   0 -18  -4  318.36    6.25
   0  18   4  319.33    6.30
   0  19  -4    1.94    1.91
   0  19   4   -1.12    1.81
   0  19  -4    0.49    1.89
   0 -19  -4    0.85    1.94
   0 -19  -4   -2.62    1.14
   0  19   4   -1.12    1.03
   0  20  -4   31.22    2.42
   0  20   4   28.44    2.28
   0  20  -4   31.52    2.44
   0 -20  -4   32.73    3.68
   0 -20  -4   28.84    2.35
   0  20   4   31.30    2.06
   0  21  -4   -2.87    3.39
   0  21   4    5.29    3.15
   0  21  -4    4.54    3.48
   0 -21  -4    1.78    3.30
   0 -21  -4   -3.18    1.75
   0  21   4    0.85    1.67
   0  22  -4   73.66    4.84
   0  22   4   80.49    4.61
   0  22  -4   76.66    4.77
   0 -22  -4   73.96    4.65
   0 -22  -4   81.13    3.30
   0  22   4   79.46    2.68
   0  23  -4    2.99    3.68
   0  23   4   -0.85    3.33
   0  23  -4   -1.67    2.31
   0 -23  -4    0.06    2.23
   0 -23  -4    1.12    1.92
   0  23   4   -0.43    1.01
   0  24  -4   19.15    4.15
   0  24   4   24.51    3.88
   0  24  -4   20.14    2.68
   0 -24  -4   20.70    2.49
   0 -24  -4   19.92    1.35
   0  24   4   22.63    1.96
   0  25  -4    2.16    2.48
   0  25   4    3.39    2.27
   0  25  -4    0.23    4.00
   0 -25  -4   -0.15    3.82
   0 -25  -4    0.53    1.66
   0  25   4   -0.01    1.69
   0  26  -4    2.70    2.64
   0  26   4    6.24    2.46
   0  26  -4    3.68    4.02
   0 -26  -4    2.61    4.02
   0 -26  -4    2.42    1.71
   0  26   4    4.65    1.16
   0  27  -4    1.78    4.22
   0  27   4    0.35    2.49
   0  27  -4    2.95    2.48
   0 -27  -4    0.63    2.55
   0 -27  -4   -0.34    1.83
   0  27   4    0.43    1.79
   0  28  -4   66.90    5.78
   0  28   4   72.91    5.37
   0  28  -4   73.58    5.56
   0 -28  -4   67.89    3.82
   0 -28  -4   73.22    2.56
   0  28   4   71.57    2.84
   0  29  -4    0.58    2.88
   0  29   4    3.46    4.13
   0  29  -4   -0.61    4.35
   0 -29  -4   -0.77    1.76
   0  30   4   10.22    2.81
   0  30  -4    8.72    3.05
   0  30   4    6.05    2.91
   0  30  -4    8.90    3.04
   0  31   4    0.44    4.70
   0  31  -4   -0.15    4.79
   0  31   4   -0.65    4.55
   0  31  -4   -1.59    4.78
   0   0   5    3.73    1.32
   0   0  -5    2.64    1.33
   0   0  -5    1.88    1.15
   0   0   5    3.30    1.20
   0  -1   5    0.12    1.29
   0   1  -5    1.49    2.20
   0   1   5    0.20    2.22
   0  -1  -5    0.35    1.31
   0   1  -5   -1.30    1.74
   0  -1  -5   -0.67    1.17
   0  -1   5   -0.71    1.76
   0   1   5   -0.39    1.14
   0  -2   5  138.95    3.89
   0   2  -5  137.19    2.84
   0   2   5  134.82    2.78
   0  -2  -5  137.26    3.91
   0   2  -5  134.31    2.40
   0  -2  -5  131.63    2.68
   0  -2   5  134.93    3.27
   0   2   5  133.21    3.62
   0  -3   5    1.19    1.28
   0   3  -5    1.02    1.32
   0   3   5    1.23    2.19
   0  -3  -5    0.52    2.15
   0   3  -5    1.34    0.86
   0  -3   5   -1.10    1.56
   0  -3  -5    1.39    1.24
   0   3   5    1.81    1.94
   0  -4   5   77.50    2.10
   0   4  -5   76.81    2.13
   0   4   5   75.15    3.11
   0  -4  -5   79.33    2.16
   0   4  -5   77.44    2.07
   0  -4   5   76.78    2.23
   0  -4  -5   76.23    2.97
   0   4   5   73.48    2.79
   0  -5   5    1.27    1.26
   0   5  -5   -1.58    2.21
   0   5   5    2.12    2.17
   0  -5  -5    0.83    1.33
   0   5  -5   -0.35    0.71
   0  -5   5   -0.15    1.31
   0  -5  -5    0.89    1.23
   0   5   5    0.51    1.93
   0  -6   5  165.24    4.20
   0   6  -5  167.77    4.40
   0   6   5  163.16    4.32
   0  -6  -5  161.16    3.27
   0   6  -5  158.15    2.80
   0  -6   5  163.05    2.42
   0  -6  -5  161.70    3.04
   0   6   5  151.98    3.91
   0  -7   5    0.72    2.18
   0   7  -5   -0.35    1.35
   0   7   5   -0.91    2.29
   0  -7  -5   -1.11    2.28
   0   7  -5    0.45    0.95
   0  -7   5    0.54    1.04
   0  -7  -5    1.71    1.97
   0   7   5   -0.05    1.89
   0  -8   5  261.38    4.72
   0   8  -5  251.93    5.91
   0   8   5  256.54    6.00
   0  -8  -5  256.98    4.86
   0   8  -5  254.58    3.90
   0  -8   5  257.44    3.95
   0  -8  -5  256.34    5.41
   0   8   5  252.96    5.31
   0  -9   5   -1.32    2.24
   0   9  -5    0.28    1.43
   0   9   5    1.00    1.40
   0  -9  -5    2.35    1.40
   0   9  -5   -0.26    0.79
   0   9   5   -2.93    1.18
   0 -10   5  918.61   21.19
   0  10  -5  899.72   19.62
   0  10   5  926.09   19.86
   0 -10  -5  910.71   20.12
   0  10  -5  924.89   17.71
   0 -10   5  972.22   18.87
   0 -10  -5  915.18   22.61
   0  10   5  899.25   19.60
   0 -11   5   -0.78    1.40
   0  11  -5    1.61    1.45
   0  11   5   -0.66    1.42
   0 -11  -5   -0.93    1.43
   0  11  -5    0.34    0.65
   0 -11   5   -1.52    0.93
   0 -11  -5   -2.67    1.82
   0  11   5    0.46    1.09
   0 -12   5  361.51    8.01
   0  12  -5  364.06    8.21
   0  12   5  369.22    7.02
   0 -12  -5  358.14    8.23
   0  12  -5  378.34    5.48
   0 -12   5  376.97    5.74
   0 -12  -5  373.11    7.53
   0  12   5  362.37    6.37
   0 -13   5   -0.50    1.46
   0  13  -5   -0.99    1.48
   0 -13  -5   -0.28    1.46
   0  13  -5    0.82    0.67
   0 -13   5   -0.66    0.53
   0 -13  -5    0.73    1.06
   0  13   5   -0.05    1.73
   0  14  -5    6.65    2.57
   0  14   5    6.55    1.57
   0 -14  -5    8.39    2.56
   0  14  -5    4.31    1.66
   0 -14   5    5.70    0.65
   0 -14  -5    5.00    1.79
   0  14   5    5.49    1.79
   0 -14   5    5.64    0.47
   0  15  -5    0.94    1.60
   0  15   5    1.40    2.52
   0 -15  -5    1.94    2.65
   0  15  -5    1.59    1.60
   0 -15  -5    0.08    1.77
   0 -15   5    0.06    0.47
   0  16  -5  114.47    4.34
   0  16   5  118.69    3.17
   0 -16  -5  114.48    3.24
   0  16  -5  113.86    3.17
   0 -16  -5  112.49    2.51
   0 -16   5  111.67    1.45
   0  16   5  112.93    3.19
   0 -16   5  115.11    1.41
   0  17  -5   -0.86    3.00
   0  17   5    1.17    1.73
   0 -17  -5    0.78    1.81
   0  17  -5    2.17    1.79
   0 -17  -5   -0.42    1.83
   0  17   5   -0.62    1.79
   0  18  -5  216.51    6.74
   0  18   5  234.43    6.61
   0 -18  -5  217.74    5.20
   0  18  -5  215.22    5.01
   0 -18  -5  223.83    4.30
   0  18   5  212.03    4.00
   0  19  -5   -0.85    3.28
   0  19   5   -0.83    2.99
   0 -19  -5    0.58    2.01
   0  19  -5   -1.96    1.98
   0 -19  -5   -2.20    2.00
   0  19   5   -0.49    1.14
   0  20  -5    0.86    2.10
   0  20   5    1.24    3.16
   0 -20  -5    0.76    2.07
   0  20  -5    2.35    2.10
   0  20   5   -0.39    1.83
   0  21  -5    0.01    2.17
   0  21   5   -1.83    3.26
   0 -21  -5   -0.45    2.11
   0  21  -5    0.73    2.14
   0 -21  -5   -1.78    1.96
   0  21   5   -0.63    1.84
   0  22  -5   21.53    4.09
   0  22   5   23.14    3.87
   0  22  -5   23.48    2.58
   0 -22  -5   24.06    3.98
   0 -22  -5   19.47    2.73
   0  22   5   22.60    2.19
   0  23  -5   -1.57    3.85
   0  23   5    1.89    3.40
   0  23  -5    2.17    3.75
   0 -23  -5   -0.02    3.57
   0 -23  -5    2.35    2.31
   0  23   5   -0.82    1.85
   0  24  -5   14.52    4.23
   0  24   5   20.60    3.93
   0  24  -5   19.19    4.09
   0 -24  -5   22.32    4.07
   0 -24  -5   17.83    1.35
   0  24   5   19.39    1.41
   0  25  -5    3.43    4.09
   0  25   5    2.69    3.76
   0  25  -5    8.70    2.52
   0 -25  -5    0.94    2.44
   0 -25  -5   -1.38    1.85
   0  25   5    0.23    1.94
   0  26  -5   99.13    6.02
   0  26   5  103.73    3.96
   0  26  -5   96.86    3.95
   0 -26  -5   92.91    4.02
   0 -26  -5   98.10    3.31
   0  26   5  105.82    3.42
   0  27  -5    1.35    2.67
   0  27   5    0.97    2.53
   0  27  -5   -2.01    4.34
   0 -27  -5   -3.06    4.17
   0 -27  -5   -2.57    1.90
   0  27   5   -0.12    1.29
   0  28  -5    1.22    2.76
   0  28   5   -1.89    2.65
   0  28  -5    2.10    4.39
   0 -28  -5   -0.11    4.43
   0 -28  -5   -0.29    1.88
   0  28   5   -0.30    2.06
   0  29  -5    0.10    4.75
   0  29   5    2.06    4.33
   0  29  -5   -1.08    2.85
   0 -29  -5    3.37    4.44
   0 -29  -5    2.72    2.21
   0  29   5    0.96    2.07
   0  30  -5   13.41    5.03
   0  30   5   14.61    4.75
   0  30  -5   16.31    3.23
   0 -30  -5   19.38    3.16
   0  31  -5    4.08    3.17
   0  31   5   -3.07    2.95
   0  31  -5   -1.35    4.82
   0   0   6 2992.60  109.08
   0   0  -6 2865.24  107.02
   0   0  -6 3002.38  104.63
   0   0   6 2948.49  103.09
   0  -1   6    0.89    1.34
   0   1   6    0.81    2.23
   0   1  -6   -0.04    2.31
   0  -1  -6    0.00    1.40
   0   1  -6    0.24    1.10
   0  -1  -6    0.18    1.24
   0  -1   6   -0.49    1.14
   0   1   6    1.92    2.02
   0  -2   6  441.40    7.76
   0   2  -6  437.48    9.28
   0   2   6  436.65    9.04
   0  -2  -6  430.85    7.84
   0   2  -6  435.35    8.08
   0  -2  -6  438.29    7.59
   0  -2   6  429.47    8.09
   0   2   6  420.51    8.42
   0  -3   6    0.95    1.28
   0   3  -6    1.40    1.37
   0   3   6    0.06    1.27
   0  -3  -6   -1.24    1.36
   0   3  -6    0.91    0.94
   0  -3  -6    0.19    1.28
   0  -3   6    0.35    1.63
   0   3   6    1.19    2.06
   0  -4   6  401.65    8.13
   0   4  -6  391.48    8.28
   0   4   6  387.15    6.92
   0  -4  -6  384.44    8.25
   0   4  -6  389.65    6.84
   0  -4  -6  390.37    8.01
   0  -4   6  385.93    6.19
   0   4   6  373.12    7.62
   0  -5   6   -0.02    1.33
   0   5  -6    1.06    1.38
   0   5   6    0.52    2.19
   0  -5  -6   -2.32    1.37
   0   5  -6    0.53    1.29
   0  -5  -6   -0.21    1.29
   0  -5   6   -0.24    1.45
   0   5   6   -0.82    2.07
   0  -6   6  133.82    3.91
   0   6  -6  132.29    4.09
   0   6   6  129.75    4.00
   0  -6  -6  132.10    2.98
   0   6  -6  129.23    2.10
   0  -6   6  131.99    2.19
   0  -6  -6  133.50    2.88
   0   6   6  126.44    2.70
   0  -7   6    3.18    2.26
   0   7  -6   -2.46    2.34
   0   7   6    2.01    2.34
   0  -7  -6   -1.46    2.34
   0   7  -6   -0.79    1.15
   0  -7   6   -0.84    1.24
   0  -7  -6   -0.74    2.23
   0   7   6   -1.18    1.25
   0  -8   6    0.06    1.39
   0   8  -6    1.39    1.47
   0   8   6    1.12    1.40
   0   8  -6   -1.75    1.15
   0  -8   6    0.40    2.11
   0  -9   6    2.99    2.29
   0   9  -6    0.35    1.48
   0   9   6    2.09    2.34
   0  -9  -6    1.80    1.43
   0   9  -6   -0.70    1.02
   0 -10   6  186.05    4.84
   0  10  -6  180.57    3.85
   0  10   6  182.26    3.76
   0 -10  -6  183.68    4.98
   0  10  -6  182.45    2.96
   0 -10   6  183.06    3.06
   0 -10  -6  183.20    4.53
   0  10   6  176.59    3.42
   0 -11   6   -1.18    1.45
   0  11  -6   -0.68    1.43
   0  11   6   -0.99    1.41
   0 -11  -6    1.36    2.45
   0  11  -6    1.27    0.77
   0 -11   6   -1.82    1.33
   0 -11  -6    2.24    2.24
   0  11   6   -0.42    1.27
   0 -12   6   24.46    2.74
   0  12  -6   25.31    1.77
   0  12   6   25.32    1.79
   0 -12  -6   27.68    1.81
   0  12  -6   26.47    0.95
   0 -12   6   26.65    0.99
   0 -12  -6   23.88    2.27
   0  12   6   26.95    1.47
   0 -13   6    0.01    1.48
   0  13  -6   -2.14    2.50
   0  13   6    1.32    2.38
   0 -13  -6    1.89    1.52
   0  13  -6    0.07    0.63
   0 -13   6   -0.35    0.66
   0 -13  -6    0.93    1.20
   0  13   6   -0.69    1.90
   0 -14   6  121.11    3.02
   0  14  -6  120.07    3.15
   0  14   6  120.56    4.15
   0 -14  -6  120.32    3.20
   0  14  -6  117.38    1.79
   0 -14  -6  116.78    2.62
   0 -14   6  122.88    1.80
   0  14   6  118.55    3.44
   0  15  -6    0.02    2.70
   0  15   6    0.94    1.59
   0 -15  -6    3.85    2.72
   0 -15  -6    4.59    2.22
   0 -15   6    2.46    0.56
   0  15   6    0.72    2.01
   0  16  -6    3.24    1.86
   0  16   6    5.41    2.80
   0 -16  -6    7.74    1.81
   0  16  -6    2.23    3.04
   0 -16  -6    5.47    2.11
   0 -16   6    5.40    0.45
   0  16   6    6.39    1.98
   0 -16   6    5.15    0.55
   0  17  -6   -2.20    3.10
   0  17   6    0.51    2.87
   0 -17  -6    2.00    1.87
   0  17  -6    0.94    3.11
   0 -17  -6   -0.92    1.33
   0  17   6   -1.15    1.97
   0 -17   6   -0.04    0.37
   0  18  -6    4.72    3.31
   0  18   6    3.23    1.87
   0 -18  -6    5.51    2.02
   0  18  -6    2.77    3.23
   0 -18  -6   -2.03    2.28
   0  18   6    4.63    2.08
   0  19  -6    2.79    3.25
   0  19   6    3.62    3.03
   0 -19  -6    2.59    2.02
   0  19  -6   -2.10    3.28
   0 -19  -6   -1.57    1.56
   0  19   6   -0.06    2.03
   0  20  -6   87.63    3.38
   0  20   6   94.22    4.57
   0 -20  -6   89.12    3.37
   0  20  -6   94.08    4.92
   0 -20  -6   88.86    3.37
   0  20   6   92.75    3.28
   0  21  -6   -0.65    2.28
   0 -21  -6   -2.11    2.20
   0  21  -6    2.48    3.52
   0 -21  -6    7.25    2.87
   0  21   6    0.63    2.07
   0  22  -6   92.89    3.68
   0  22   6  100.51    5.01
   0 -22  -6   94.12    3.71
   0  22  -6   92.55    5.26
   0 -22  -6   94.04    3.83
   0  22   6   97.28    2.57
   0  23  -6    0.28    2.40
   0  23   6   -1.26    3.54
   0  23  -6    1.28    2.32
   0 -23  -6    1.23    2.32
   0 -23  -6    2.92    2.28
   0  23   6    1.00    2.12
   0  24  -6    7.19    2.62
   0  24   6    9.59    3.72
   0  24  -6    7.34    2.50
   0 -24  -6    7.13    2.50
   0 -24  -6    8.05    2.19
   0  24   6   10.50    2.20
   0  25  -6    3.15    2.52
   0  25  -6    1.77    2.45
   0 -25  -6   -2.36    2.40
   0 -25  -6    1.79    1.30
   0  25   6    0.57    2.13
   0  26  -6    5.70    4.43
   0  26   6    4.13    3.83
   0  26  -6    3.78    4.22
   0 -26  -6    4.77    4.10
   0 -26  -6    5.16    2.39
   0  26   6    3.08    2.21
   0  27  -6   -0.57    4.51
   0  27   6    3.92    3.92
   0  27  -6    4.75    4.43
   0 -27  -6    2.66    4.32
   0 -27  -6   -1.26    2.07
   0  27   6   -0.16    1.48
   0  28  -6  193.23    8.73
   0  28   6  202.92    5.92
   0  28  -6  196.41    6.28
   0 -28  -6  197.42    8.49
   0 -28  -6  206.89    5.26
   0  28   6  211.49    5.72
   0  29  -6    2.13    3.01
   0  29   6    2.99    2.73
   0  29  -6   -0.03    2.92
   0 -29  -6    2.83    2.88
   0 -29  -6    0.57    2.30
   0  29   6    1.81    2.30
   0  30  -6   23.70    3.56
   0  30   6   25.01    3.14
   0  30  -6   26.00    5.39
   0 -30  -6   21.06    3.39
   0 -30  -6   21.13    2.68
   0   0   7    0.31    2.27
   0   0  -7    1.50    2.30
   0   0  -7    1.07    2.01
   0   0   7    0.25    2.01
   0  -1   7    1.90    1.38
   0   1   7    1.10    2.24
   0   1  -7   -0.05    2.33
   0  -1  -7    0.15    1.41
   0   1  -7    0.90    1.91
   0  -1  -7    2.19    2.13
   0  -1   7   -0.01    1.14
   0   1   7   -0.32    1.26
   0  -2   7   58.39    3.02
   0   2  -7   59.44    2.07
   0   2   7   59.57    2.03
   0  -2  -7   57.27    2.03
   0   2  -7   54.40    2.44
   0  -2  -7   57.73    1.94
   0  -2   7   56.96    2.55
   0   2   7   55.97    1.83
   0  -3   7    0.43    1.35
   0   3  -7   -0.76    2.36
   0   3   7    1.69    2.31
   0  -3  -7    1.09    2.37
   0   3  -7    0.22    1.05
   0  -3  -7   -1.71    1.37
   0  -3   7    0.34    1.80
   0   3   7    1.90    2.17
   0  -4   7  365.81    7.78
   0   4  -7  365.35    8.04
   0   4   7  373.44    8.08
   0  -4  -7  359.98    6.79
   0   4  -7  364.40    6.74
   0  -4  -7  358.62    7.64
   0  -4   7  362.76    6.86
   0   4   7  358.15    7.49
   0  -5   7   -0.42    1.40
   0   5  -7    1.43    2.33
   0   5   7    0.03    1.43
   0  -5  -7    1.81    1.47
   0   5  -7   -0.91    1.47
   0  -5  -7    0.25    1.43
   0   5   7   -2.34    2.25
   0  -6   7  652.53   12.55
   0   6  -7  672.59   14.69
   0   6   7  663.82   12.83
   0  -6  -7  666.98   14.72
   0   6  -7  639.37   11.59
   0  -6  -7  645.37   13.21
   0  -6   7  657.65   14.82
   0   6   7  639.19   13.11
   0  -7   7    0.76    1.38
   0   7  -7    0.58    1.50
   0   7   7    0.67    2.34
   0  -7  -7    2.23    2.41
   0  -7   7    6.37    2.45
   0   7   7    4.84    1.99
   0  -8   7  934.63   20.15
   0   8  -7  969.50   23.19
   0   8   7  953.29   22.32
   0  -8  -7  960.44   21.75
   0   8  -7  946.01   19.47
   0  -8  -7  944.41   21.94
   0  -8   7  937.73   18.82
   0   8   7  941.95   20.22
   0  -9   7    0.79    1.46
   0   9  -7    0.49    2.42
   0   9   7    1.91    1.43
   0  -9  -7   -1.24    1.52
   0   9  -7   -0.62    1.06
   0  -9  -7    2.29    2.50
   0   9   7   -0.14    1.37
   0 -10   7  162.46    4.62
   0  10  -7  162.47    3.59
   0  10   7  168.96    3.55
   0 -10  -7  161.61    3.61
   0  10  -7  157.17    2.78
   0 -10  -7  160.45    4.50
   0 -10   7  158.36    2.94
   0  10   7  158.63    4.34
   0 -11   7   -0.18    2.36
   0  11  -7   -1.63    2.51
   0  11   7   -1.49    1.54
   0 -11  -7    0.72    2.51
   0  11  -7   -0.42    0.90
   0 -11  -7    0.28    2.14
   0 -11   7   -0.07    0.97
   0  11   7    0.57    2.14
   0 -12   7   79.97    2.42
   0  12  -7   79.20    3.68
   0  12   7   82.45    2.45
   0 -12  -7   79.55    3.70
   0  12  -7   79.39    1.68
   0 -12  -7   80.91    3.20
   0 -12   7   81.65    1.71
   0  12   7   79.35    3.14
   0 -13   7    0.04    1.56
   0  13  -7   -0.57    2.78
   0  13   7    0.19    1.53
   0 -13  -7    1.38    1.62
   0  13  -7    0.85    1.02
   0 -13  -7   -0.43    2.16
   0 -13   7   -0.11    0.80
   0  13   7   -2.85    2.16
   0 -14   7  324.17    7.69
   0  14  -7  300.87    6.41
   0  14   7  311.08    7.53
   0 -14  -7  305.79    7.89
   0  14  -7  319.83    5.18
   0 -14  -7  312.30    5.96
   0 -14   7  314.33    4.72
   0  14   7  305.67    7.07
   0 -15   7    0.81    1.71
   0  15  -7   -0.07    2.97
   0  15   7    4.11    2.69
   0 -15  -7    1.53    1.76
   0  15  -7    0.54    0.64
   0 -15  -7   -0.33    1.36
   0 -15   7    0.67    0.64
   0  15   7   -1.12    2.14
   0 -16   7    6.70    1.87
   0  16  -7    5.56    1.96
   0  16   7    6.95    1.78
   0 -16  -7   10.96    1.92
   0  16  -7    5.37    0.81
   0 -16  -7    3.58    2.45
   0 -16   7    5.77    0.83
   0  16   7    6.16    2.28
   0  17  -7   -1.80    2.01
   0  17   7    0.91    2.88
   0 -17  -7    1.38    3.17
   0  17  -7    1.93    1.98
   0 -17  -7    1.66    1.67
   0  17   7   -0.69    2.26
   0 -17   7   -0.02    0.57
   0  18  -7   99.45    4.90
   0  18   7  100.62    4.44
   0 -18  -7   97.14    4.81
   0  18  -7   92.01    3.32
   0 -18  -7   89.40    3.94
   0 -18   7   91.67    1.28
   0  18   7   97.28    3.59
   0 -18   7   96.04    1.26
   0  19  -7    3.01    3.51
   0  19   7    2.88    1.92
   0 -19  -7    4.15    3.45
   0  19  -7   -1.33    2.12
   0  19   7    1.73    2.29
   0  20  -7    8.79    2.42
   0  20   7   14.13    3.45
   0 -20  -7   13.97    3.64
   0  20  -7    8.20    2.35
   0 -20  -7    6.48    1.76
   0  20   7   11.73    2.38
   0  21  -7   -1.20    2.35
   0  21   7    0.06    3.40
   0 -21  -7   -3.80    3.74
   0  21  -7    0.26    2.25
   0  21   7   -0.06    2.26
   0  22  -7    0.33    2.45
   0  22   7    4.94    3.49
   0 -22  -7    3.63    3.83
   0  22  -7    1.14    2.43
   0 -22  -7    2.06    2.92
   0  22   7    5.68    2.33
   0  23  -7   -1.50    2.57
   0  23   7    1.71    3.56
   0 -23  -7    1.27    3.82
   0  23  -7   -1.34    2.41
   0 -23  -7   -1.79    2.30
   0  23   7   -3.64    2.39
   0  24  -7    6.87    2.67
   0  24   7    7.92    3.81
   0 -24  -7    9.14    4.08
   0  24  -7   10.11    2.54
   0 -24  -7    9.56    2.41
   0  24   7    8.77    1.57
   0  25  -7    2.51    2.69
   0  25   7    4.59    3.65
   0  25  -7    6.91    4.10
   0 -25  -7    0.74    4.07
   0 -25  -7   -1.91    2.50
   0  25   7    0.76    1.45
   0  26  -7    8.17    2.80
   0  26   7    4.22    3.94
   0  26  -7    2.31    4.30
   0 -26  -7    4.39    4.29
   0 -26  -7    3.93    1.51
   0  26   7    5.45    2.51
   0  27  -7    1.84    2.82
   0  27   7    3.08    4.03
   0  27  -7   -1.51    4.44
   0 -27  -7    1.17    2.68
   0 -27  -7    1.67    2.34
   0  27   7    1.63    2.49
   0  28  -7   29.95    3.54
   0  28   7   36.44    4.82
   0  28  -7   35.34    3.34
   0 -28  -7   36.00    3.40
   0 -28  -7   36.30    3.02
   0  28   7   38.39    3.18
   0  29  -7    3.04    5.01
   0  29   7    0.79    4.30
   0  29  -7    6.06    3.04
   0 -29  -7   -0.60    2.99
   0 -29  -7    2.35    2.77
   0  29   7    3.10    2.64
   0  30  -7    4.51    5.26
   0  30   7    2.86    2.82
   0  30  -7    2.30    5.11
   0 -30  -7   -0.26    5.04
   0 -30  -7    1.77    2.51
   0  30   7    6.14    2.74
   0   0   8  146.25    3.11
   0   0  -8  141.62    3.27
   0   0  -8  132.78    3.09
   0   0   8  128.75    3.58
   0  -1   8    0.14    2.33
   0   1   8    1.37    2.29
   0   1  -8   -0.16    2.41
   0  -1  -8   -2.47    2.48
   0  -2   8   29.18    2.66
   0   2  -8   30.68    2.79
   0   2   8   29.84    2.66
   0  -2  -8   33.40    2.80
   0   2  -8   23.77    1.86
   0  -2   8   29.62    2.59
   0   2   8   17.54    4.20
   0  -3   8    1.40    1.44
   0   3  -8    0.42    1.46
   0   3   8   -0.60    1.41
   0  -4   8  186.03    3.73
   0   4  -8  186.40    3.97
   0   4   8  187.65    3.79
   0  -4  -8  182.39    5.08
   0   4  -8  205.93    5.18
   0  -4   8  207.12    6.25
   0   4   8  198.74    6.89
   0  -5   8    0.82    1.39
   0   5  -8    1.38    2.49
   0   5   8   -1.41    1.45
   0  -5  -8    1.41    1.50
   0  -5   8    2.21    1.17
   0  -6   8    6.04    1.42
   0   6  -8    4.55    2.53
   0   6   8    2.83    2.36
   0  -6  -8    3.35    1.51
   0   6  -8    2.65    1.52
   0  -6  -8    2.87    1.50
   0  -6   8    2.20    1.69
   0   6   8    4.44    1.44
   0  -7   8   -0.44    1.42
   0   7  -8    0.67    1.54
   0   7   8   -0.54    2.37
   0  -7  -8   -0.49    2.47
   0   7  -8   -0.72    1.40
   0  -7  -8    1.24    2.61
   0   7   8    0.01    1.45
   0  -8   8  282.34    5.29
   0   8  -8  274.40    5.49
   0   8   8  279.72    5.32
   0  -8  -8  275.63    6.82
   0   8  -8  275.27    5.01
   0  -8  -8  275.74    6.78
   0  -8   8  272.35    5.27
   0   8   8  272.11    5.30
   0  -9   8   -0.54    2.43
   0   9  -8   -0.58    2.50
   0   9   8    3.34    2.38
   0  -9  -8    2.29    2.58
   0   9  -8    0.15    1.17
   0  -9  -8    1.18    2.39
   0  -9   8    0.79    1.29
   0   9   8   -0.30    2.29
   0 -10   8   12.64    2.69
   0  10  -8   11.15    2.74
   0  10   8   15.63    2.63
   0 -10  -8   15.05    1.86
   0  10  -8   13.93    1.23
   0 -10  -8   12.61    2.67
   0 -10   8   13.82    1.34
   0  10   8   13.92    2.58
   0 -11   8   -0.06    1.53
   0  11  -8    0.54    2.66
   0  11   8    1.26    2.49
   0 -11  -8    2.57    1.57
   0  11  -8    0.47    0.62
   0 -11  -8    2.81    2.32
   0 -11   8   -0.66    1.08
   0  11   8    0.23    2.23
   0 -12   8    8.78    2.62
   0  12  -8    6.33    2.93
   0  12   8    3.86    2.60
   0 -12  -8    8.16    2.80
   0  12  -8    4.76    1.03
   0 -12  -8    2.65    2.50
   0 -12   8    2.69    1.12
   0  12   8    3.20    1.51
   0 -13   8   -0.08    1.64
   0  13  -8   -0.14    1.81
   0  13   8    5.81    2.65
   0 -13  -8    2.08    2.80
   0  13  -8    0.03    0.92
   0 -13  -8    7.69    2.64
   0 -13   8    0.22    1.08
   0  13   8    0.80    1.57
   0 -14   8   32.71    2.13
   0  14  -8   32.87    2.31
   0  14   8   36.49    3.28
   0 -14  -8   38.54    3.48
   0 -14  -8   34.46    2.98
   0 -14   8   32.49    1.17
   0  14   8   32.29    1.89
   0 -15   8   -0.46    2.87
   0  15  -8    0.30    3.22
   0  15   8    0.35    1.78
   0 -15  -8    0.53    1.87
   0  15  -8   -0.05    0.85
   0 -15  -8   -2.19    1.58
   0 -15   8   -3.24    1.16
   0  15   8   -0.59    1.51
   0 -16   8   29.86    3.49
   0  16  -8   31.14    2.41
   0  16   8   36.78    3.36
   0 -16  -8   28.26    3.71
   0  16  -8   32.55    1.08
   0 -16  -8   36.78    2.31
   0 -16   8   32.64    1.10
   0  16   8   35.06    3.01
   0 -17   8    0.47    3.13
   0  17  -8    0.84    2.12
   0  17   8   -1.92    1.83
   0 -17  -8    0.25    2.02
   0  17  -8    0.39    0.62
   0 -17  -8   -2.52    2.75
   0 -17   8   -1.99    0.91
   0  17   8    1.15    2.54
   0  18  -8   12.48    3.74
   0  18   8   12.90    3.30
   0 -18  -8   14.53    2.28
   0 -18  -8   14.78    2.13
   0  18   8   15.74    2.75
   0 -18   8   12.13    0.59
   0  19  -8    1.84    2.22
   0  19   8    0.07    2.03
   0 -19  -8   -1.33    2.14
   0  19  -8    1.04    2.20
   0 -19  -8   -2.83    2.79
   0 -19   8   -0.02    0.45
   0  19   8    1.65    2.49
   0 -19   8    0.41    0.42
   0  20  -8    6.82    2.41
   0  20   8   10.18    2.17
   0 -20  -8    9.42    3.84
   0  20  -8    7.27    2.31
   0 -20  -8   18.85    3.57
   0  20   8    8.89    2.62
   0  21  -8   -2.65    3.91
   0  21   8    0.44    3.30
   0 -21  -8    2.64    3.80
   0  21  -8   -1.19    2.35
   0 -21  -8    2.31    3.14
   0  21   8    0.46    2.53
   0  22  -8   42.55    4.76
   0  22   8   45.16    4.13
   0 -22  -8   40.48    4.60
   0  22  -8   41.75    4.69
   0 -22  -8   42.15    3.32
   0  22   8   47.22    3.15
   0  23  -8   -2.25    4.29
   0  23   8    2.86    3.60
   0 -23  -8    3.76    3.98
   0  23  -8    5.27    4.07
   0 -23  -8    1.40    2.58
   0  23   8   -0.02    2.54
   0  24  -8   -0.03    4.30
   0  24   8    0.68    2.33
   0 -24  -8   -4.02    4.07
   0  24  -8   -2.72    4.11
   0 -24  -8   -2.31    2.62
   0  24   8    1.26    2.61
   0  25  -8   -0.80    4.55
   0  25   8    1.90    2.28
   0 -25  -8    0.03    4.27
   0  25  -8    2.09    4.20
   0 -25  -8   -0.59    2.89
   0  25   8   -0.21    2.58
   0  26  -8   22.26    5.11
   0  26   8   26.69    2.71
   0  26  -8   20.11    4.83
   0 -26  -8   23.14    3.08
   0 -26  -8   24.44    2.93
   0  26   8   29.26    2.04
   0  27  -8    1.42    4.62
   0  27   8    2.03    2.55
   0  27  -8    0.29    2.78
   0 -27  -8   -0.65    2.75
   0 -27  -8    0.17    2.62
   0  27   8   -0.31    1.70
   0  28  -8   11.82    5.10
   0  28   8    8.48    2.77
   0  28  -8    7.55    2.97
   0 -28  -8    6.95    3.02
   0 -28  -8    8.31    2.99
   0  28   8    5.57    3.00
   0  29  -8   -5.15    5.21
   0  29   8   -0.86    4.35
   0  29  -8    0.38    4.83
   0 -29  -8    3.71    3.00
   0 -29  -8   -5.21    2.80
   0  29   8    0.26    2.91
   0   0   9    1.14    2.35
   0   0  -9   -1.13    2.52
   0   0  -9   -1.10    2.18
   0   0   9   -0.44    1.37
   0  -1   9    1.08    2.34
   0   1   9    3.58    2.31
   0   1  -9   -2.13    2.44
   0  -1  -9   -1.77    2.55
   0   1  -9   -2.17    2.04
   0  -1  -9    0.83    1.37
   0  -1   9   -6.38    2.28
   0   1   9   -3.13    2.32
   0  -2   9  316.27    7.12
   0   2   9  314.94    7.08
   0   2  -9  323.61    7.63
   0  -2  -9  313.17    6.16
   0   2  -9  315.13    6.52
   0  -2  -9  319.49    7.15
   0  -2   9  307.33    5.65
   0   2   9  308.57    5.80
   0  -3   9   -0.22    2.44
   0   3   9   -0.45    2.37
   0   3  -9    2.19    2.54
   0   3  -9   -4.24    1.93
   0  -3  -9   -3.04    1.52
   0  -3   9   -1.29    2.32
   0   3   9   -6.92    2.54
   0  -4   9  182.47    4.85
   0   4  -9  177.25    5.08
   0   4   9  182.81    4.91
   0  -4  -9  178.90    3.89
   0   4  -9  179.95    4.24
   0  -4  -9  183.66    5.10
   0  -4   9  190.66    4.89
   0   4   9  180.45    3.92
   0  -5   9   -1.14    2.40
   0   5  -9    2.02    1.55
   0   5   9   -1.10    1.43
   0  -5  -9   -0.58    2.50
   0   5  -9    1.09    1.13
   0  -5  -9    1.31    1.63
   0  -5   9    0.84    1.25
   0   5   9   -2.52    2.70
   0  -6   9   84.43    3.41
   0   6  -9   79.20    3.70
   0   6   9   81.97    2.40
   0  -6  -9   85.75    3.71
   0   6  -9   75.58    2.51
   0  -6  -9   79.57    3.57
   0  -6   9   79.51    2.61
   0   6   9   77.16    3.46
   0  -7   9    2.32    2.43
   0   7  -9    0.66    1.65
   0   7   9   -0.15    2.45
   0  -7  -9    1.82    2.58
   0   7  -9    1.21    0.89
   0  -7  -9   -1.19    2.46
   0  -7   9    0.29    1.55
   0   7   9    2.44    1.46
   0  -8   9  186.72    3.86
   0   8  -9  181.83    5.32
   0   8   9  189.02    3.97
   0  -8  -9  185.72    5.29
   0   8  -9  183.55    3.06
   0  -8  -9  183.01    5.12
   0  -8   9  183.73    3.80
   0   8   9  176.92    3.87
   0  -9   9    1.92    2.51
   0   9  -9   -0.44    2.75
   0   9   9    0.07    1.56
   0  -9  -9   -1.11    2.66
   0   9  -9    1.83    1.27
   0  -9  -9   -0.73    1.58
   0  -9   9   -0.76    1.41
   0   9   9   -1.69    2.47
   0 -10   9  165.29    4.90
   0  10  -9  164.43    5.21
   0  10   9  163.23    4.77
   0 -10  -9  164.49    3.95
   0  10  -9  157.27    2.65
   0 -10  -9  160.16    3.65
   0 -10   9  162.08    3.31
   0  10   9  155.74    4.81
   0 -11   9   -0.27    1.61
   0  11  -9   -0.37    2.94
   0  11   9   -0.01    2.57
   0 -11  -9   -0.27    2.79
   0  11  -9   -0.80    1.20
   0 -11  -9    1.35    1.74
   0 -11   9    1.84    0.88
   0  11   9    1.00    1.74
   0 -12   9  100.16    4.12
   0  12  -9  101.59    4.55
   0  12   9  110.23    4.15
   0 -12  -9  102.98    4.43
   0  12  -9   98.44    2.26
   0 -12  -9   96.07    2.96
   0 -12   9   96.25    2.32
   0  12   9   98.38    2.90
   0 -13   9    2.58    2.84
   0  13  -9    0.76    1.95
   0  13   9    3.72    2.87
   0 -13  -9   -2.39    1.90
   0  13  -9    0.31    1.04
   0 -13  -9   -3.94    2.71
   0 -13   9    0.15    1.17
   0  13   9    1.91    2.64
   0 -14   9  430.73    8.83
   0  14  -9  430.27    9.41
   0  14   9  433.87    8.94
   0 -14  -9  417.00   10.96
   0  14  -9  422.10    7.43
   0 -14  -9  409.10   10.84
   0 -14   9  452.84    7.78
   0  14   9  431.93   10.28
   0 -15   9   -1.30    1.92
   0  15  -9    0.11    3.37
   0  15   9    1.49    1.77
   0 -15  -9    0.75    2.00
   0  15  -9   -0.37    0.95
   0 -15  -9   -6.93    3.38
   0 -15   9   -2.03    1.05
   0  15   9   -2.04    2.80
   0 -16   9    6.43    3.33
   0  16  -9    7.47    2.23
   0  16   9   10.10    3.14
   0 -16  -9   10.15    2.12
   0  16  -9    5.49    0.96
   0 -16   9    5.15    1.08
   0  16   9    7.09    2.90
   0 -17   9    0.82    3.40
   0  17  -9   -0.59    3.65
   0  17   9   -0.18    1.97
   0 -17  -9    6.63    3.43
   0  17  -9    0.03    0.80
   0 -17  -9   -0.57    2.04
   0  17   9    0.24    1.75
   0 -18   9  189.93    6.42
   0  18  -9  191.75    7.17
   0  18   9  198.34    6.36
   0 -18  -9  191.23    6.86
   0  18  -9  191.21    2.94
   0 -18  -9  190.96    5.88
   0 -18   9  197.13    2.99
   0  18   9  190.98    4.41
   0  19  -9   -3.76    2.37
   0  19   9   -0.95    2.06
   0 -19  -9    0.10    2.25
   0 -19   9   -0.44    0.57
   0  19   9    1.33    1.71
   0  20  -9   74.97    5.35
   0  20   9   75.04    3.13
   0 -20  -9   73.43    3.52
   0  20  -9   77.36    5.06
   0 -20  -9   83.36    4.55
   0  20   9   78.02    2.74
   0  21  -9   -2.47    4.13
   0  21   9    2.90    3.42
   0 -21  -9   -1.36    2.36
   0  21  -9    3.61    3.91
   0 -21  -9   -2.32    2.96
   0  21   9    0.84    1.71
   0  22  -9   73.14    5.69
   0  22   9   77.45    4.74
   0 -22  -9   70.13    3.59
   0  22  -9   72.17    5.33
   0 -22  -9   69.66    2.65
   0  22   9   77.07    3.84
   0  23  -9    3.33    2.75
   0  23   9    1.42    2.18
   0 -23  -9   -1.97    2.54
   0  23  -9   -3.09    4.15
   0 -23  -9    0.74    2.84
   0  23   9    0.51    2.73
   0  24  -9    6.36    2.94
   0  24   9    6.96    2.38
   0 -24  -9    3.64    2.76
   0  24  -9    4.27    4.28
   0 -24  -9   12.04    3.18
   0  24   9    6.44    1.81
   0  25  -9   -3.07    2.93
   0  25   9    0.62    2.34
   0 -25  -9    0.42    2.71
   0  25  -9    1.07    4.31
   0 -25  -9    0.74    2.75
   0  25   9    0.85    1.76
   0  26  -9   55.22    3.92
   0  26   9   59.58    3.37
   0 -26  -9   55.59    3.82
   0  26  -9   57.34    5.51
   0 -26  -9   55.08    3.59
   0  26   9   61.73    2.64
   0  27  -9    3.96    3.21
   0  27   9    3.61    2.62
   0 -27  -9    2.50    2.96
   0  27  -9    0.86    2.84
   0 -27  -9    3.22    2.02
   0  27   9   -0.49    1.94
   0  28  -9  107.17    5.08
   0  28   9  110.29    4.41
   0  28  -9  104.10    4.75
   0 -28  -9  108.53    4.84
   0 -28  -9  121.93    5.32
   0  28   9  116.40    3.71
   0  29  -9   -0.29    3.38
   0  29   9    1.92    2.70
   0  29  -9   -0.39    3.06
   0 -29  -9   -3.98    4.89
   0 -29  -9   -3.98    2.83
   0  29   9    0.80    3.11
   0   0  10   50.74    2.05
   0   0 -10   48.40    2.18
   0   0 -10   50.15    2.90
   0   0  10   48.50    2.84
   0  -1  10    0.98    1.49
   0   1  10   -1.31    2.40
   0   1 -10    0.38    2.63
   0  -1 -10    1.05    1.57
   0   1 -10    0.38    1.28
   0  -1 -10    1.63    2.31
   0  -1  10   -0.30    1.34
   0   1  10   -0.71    1.43
   0  -2  10  136.74    3.10
   0   2  10  137.85    4.31
   0   2 -10  130.73    4.51
   0  -2 -10  135.48    3.37
   0   2 -10  134.70    2.86
   0  -2 -10  135.41    3.11
   0  -2  10  135.42    3.83
   0   2  10  132.24    4.11
   0  -3  10    0.33    1.49
   0   3  10   -0.06    1.50
   0   3 -10    0.29    2.69
   0  -3 -10    1.28    1.58
   0   3 -10   -1.01    1.17
   0  -3 -10   -0.49    2.39
   0  -3  10    0.10    2.08
   0   3  10    0.74    1.45
   0  -4  10  157.89    4.65
   0   4 -10  160.82    3.78
   0   4  10  160.47    3.53
   0  -4 -10  158.07    3.70
   0   4 -10  157.99    3.06
   0  -4 -10  162.21    3.59
   0  -4  10  163.86    3.23
   0   4  10  155.02    4.64
   0  -5  10    0.94    2.52
   0   5 -10    0.41    2.68
   0   5  10   -0.83    2.43
   0  -5 -10    0.11    1.61
   0   5 -10    0.60    1.07
   0  -5 -10    1.21    1.54
   0  -5  10   -0.66    1.18
   0   5  10    3.24    1.56
   0  -6  10  482.69    9.40
   0   6 -10  475.02    9.80
   0   6  10  485.22    9.35
   0  -6 -10  473.57    9.84
   0   6 -10  481.73    9.38
   0  -6 -10  481.72   10.91
   0  -6  10  491.64    9.87
   0   6  10  471.16   10.78
   0  -7  10   -0.33    1.55
   0   7 -10    3.24    2.79
   0   7  10   -1.43    2.51
   0  -7 -10    0.50    1.66
   0   7 -10   -0.35    0.96
   0  -7 -10    1.36    2.71
   0  -7  10   -0.55    1.75
   0   7  10    0.39    2.67
   0  -8  10   11.25    2.73
   0   8 -10   11.28    3.02
   0   8  10   11.07    1.65
   0  -8 -10   10.60    2.98
   0   8 -10   12.92    1.64
   0  -8 -10   12.41    1.77
   0  -8  10   11.38    1.81
   0   8  10   12.21    1.76
   0  -9  10   -0.16    1.61
   0   9 -10    0.76    2.98
   0   9  10    0.68    1.64
   0  -9 -10    1.34    2.88
   0   9 -10    0.76    1.50
   0  -9 -10    2.58    1.84
   0  -9  10    3.02    1.82
   0   9  10    8.63    3.09
   0 -10  10   14.09    2.81
   0  10 -10   10.38    3.23
   0  10  10   13.95    2.81
   0 -10 -10    9.13    1.96
   0  10 -10   10.75    0.95
   0 -10 -10    6.67    1.93
   0 -10  10    9.02    1.73
   0  10  10    2.44    3.02
   0 -11  10   -0.32    1.76
   0  11 -10    0.68    3.11
   0  11  10    0.86    2.75
   0 -11 -10    1.94    3.08
   0  11 -10    1.32    1.31
   0 -11 -10   -0.14    1.80
   0 -11  10   -0.61    0.89
   0  11  10    0.03    1.75
   0 -12  10   17.64    3.13
   0  12 -10   19.17    3.56
   0  12  10   18.52    3.04
   0 -12 -10   13.47    2.19
   0  12 -10   16.99    1.46
   0 -12 -10   15.65    2.01
   0 -12  10   16.32    1.65
   0  12  10   18.21    1.99
   0 -13  10    3.27    2.98
   0  13 -10    2.88    3.44
   0  13  10   -0.42    1.76
   0 -13 -10    0.18    2.06
   0 -13  10    5.29    1.52
   0  13  10    9.38    3.28
   0 -14  10    0.50    1.95
   0  14 -10    0.37    2.17
   0  14  10    0.01    2.04
   0 -14 -10   -0.60    3.23
   0  14 -10    0.24    1.16
   0 -14 -10   -0.75    1.97
   0 -14  10    0.77    1.22
   0  14  10   -1.27    2.95
   0 -15  10    0.88    2.02
   0  15 -10   -1.98    3.61
   0  15  10    3.88    2.97
   0 -15 -10    0.73    3.37
   0  15 -10    1.35    1.09
   0 -15 -10   -0.87    3.70
   0 -15  10    2.04    1.46
   0  15  10   -0.89    2.00
   0 -16  10    0.39    3.38
   0  16 -10    0.67    2.26
   0  16  10   -1.60    3.05
   0 -16 -10    2.03    2.16
   0  16 -10   -0.44    0.98
   0 -16  10   -2.62    1.14
   0  16  10   -2.58    1.89
   0 -17  10    0.05    3.33
   0  17 -10    3.54    3.77
   0  17  10    1.63    1.97
   0 -17 -10    3.30    3.50
   0  17 -10   -0.59    1.23
   0 -17 -10   -2.51    1.99
   0 -17  10   -1.82    1.03
   0  17  10    0.25    1.86
   0 -18  10   31.55    4.03
   0  18 -10   30.69    2.85
   0  18  10   32.75    3.87
   0 -18 -10   32.20    4.22
   0  18 -10   29.48    1.18
   0 -18 -10   36.77    2.83
   0 -18  10   29.98    1.61
   0  18  10   31.66    3.45
   0 -19  10    2.64    3.70
   0  19 -10   -2.84    4.16
   0  19  10   -0.22    2.05
   0 -19 -10   -1.28    3.69
   0  19 -10    1.20    0.71
   0 -19 -10    6.01    3.47
   0 -19  10   -0.23    1.00
   0  20 -10   54.03    5.21
   0  20  10   56.72    4.22
   0 -20 -10   49.33    3.22
   0 -20 -10   55.01    2.76
   0 -20  10   54.63    1.10
   0  20  10   59.36    3.78
   0 -20  10   53.54    1.03
   0  21 -10    1.92    2.68
   0  21  10    5.08    3.63
   0 -21 -10   -1.84    2.46
   0  21 -10    3.17    4.15
   0 -21 -10   -1.09    3.17
   0  21  10    2.68    2.91
   0  22 -10  220.59    6.58
   0  22  10  225.11    5.82
   0 -22 -10  218.40    6.37
   0  22 -10  209.49    8.09
   0 -22 -10  222.26    6.72
   0  22  10  236.66    6.85
   0  23 -10    4.13    2.94
   0  23  10   -1.75    2.31
   0 -23 -10    1.70    2.63
   0  23 -10    0.37    4.35
   0 -23 -10    2.53    2.10
   0  23  10    0.03    1.75
   0  24 -10    0.26    4.69
   0  24  10   -0.77    2.36
   0 -24 -10   -1.40    2.75
   0  24 -10    4.97    4.23
   0 -24 -10   -2.56    3.08
   0  24  10    0.80    1.87
   0  25 -10    3.75    4.92
   0  25  10    2.28    4.03
   0 -25 -10    2.20    2.80
   0  25 -10   -5.87    4.57
   0 -25 -10    1.04    3.01
   0  25  10    1.79    1.96
   0  26 -10    5.50    4.99
   0  26  10    4.68    4.17
   0 -26 -10    0.98    2.86
   0  26 -10   -1.74    4.40
   0 -26 -10    2.92    3.58
   0  26  10    0.69    2.01
   0  27 -10    3.18    5.08
   0  27  10   -4.26    4.31
   0 -27 -10   -0.72    3.06
   0  27 -10    4.62    2.85
   0 -27 -10    5.50    3.64
   0  27  10    0.85    2.07
   0  28 -10    2.92    5.45
   0  28  10    7.34    4.55
   0 -28 -10    4.31    3.03
   0  28 -10    7.16    3.06
   0 -28 -10    1.90    1.97
   0  28  10    4.45    3.40
   0   0  11    0.09    1.58
   0   0 -11    1.94    1.73
   0   0 -11    0.93    1.40
   0   0  11   -0.61    1.47
   0  -1  11    1.58    2.53
   0   1  11    1.36    1.55
   0   1 -11   -0.49    1.75
   0  -1 -11    2.30    2.80
   0   1 -11    2.64    2.21
   0  -1 -11    1.43    2.47
   0  -1  11   -0.67    1.45
   0   1  11   -4.69    2.50
   0  -2  11    4.12    1.59
   0   2  11    5.43    2.56
   0   2 -11    4.99    2.85
   0  -2 -11    2.85    2.87
   0   2 -11    1.46    2.17
   0  -2 -11    3.33    1.56
   0  -2  11    2.42    2.29
   0   2  11    2.43    1.58
   0  -3  11   -0.36    1.59
   0   3  11    0.49    1.56
   0   3 -11    1.37    1.76
   0  -3 -11    2.13    1.69
   0   3 -11    0.98    2.03
   0  -3 -11    1.32    2.54
   0  -3  11    0.25    1.34
   0   3  11    0.23    2.63
   0  -4  11    2.65    2.68
   0   4  11    4.42    2.64
   0   4 -11    5.33    2.90
   0  -4 -11    6.35    1.74
   0   4 -11    3.53    2.10
   0  -4 -11    2.62    1.67
   0  -4  11    2.15    1.36
   0   4  11    6.54    1.68
   0   5 -11   -0.88    1.80
   0   5  11    0.22    1.61
   0  -5 -11    3.02    2.84
   0   5 -11   -0.48    1.92
   0  -5 -11   -4.79    2.84
   0  -5  11   -3.07    1.34
   0   5  11   -6.32    2.91
   0  -6  11    1.92    1.67
   0   6 -11    2.66    3.05
   0   6  11    5.68    2.71
   0  -6 -11    6.62    3.04
   0   6 -11    1.51    1.92
   0  -6 -11    5.95    3.15
   0  -6  11    8.52    2.30
   0   6  11    9.41    2.06
   0  -7  11    0.96    2.73
   0   7 -11   -0.34    1.85
   0   7  11   -2.42    1.62
   0  -7 -11    1.45    2.90
   0   7 -11    1.09    1.13
   0  -7 -11   -1.28    1.98
   0  -7  11    0.36    2.07
   0   7  11    0.74    3.27
   0  -8  11    1.75    1.72
   0   8 -11    1.78    1.93
   0   8  11    1.17    1.66
   0  -8 -11    3.06    1.88
   0   8 -11   -1.68    1.68
   0  -8 -11   -1.19    1.88
   0  -8  11   -0.40    1.87
   0   8  11    1.51    1.79
   0  -9  11    0.34    2.83
   0   9 -11   -0.85    1.95
   0   9  11    0.69    2.79
   0  -9 -11   -1.02    3.02
   0   9 -11    0.02    1.02
   0  -9 -11    1.07    1.88
   0  -9  11   -0.44    1.75
   0   9  11    0.54    1.85
   0 -10  11    7.77    1.91
   0  10 -11    7.52    2.09
   0  10  11   11.51    3.00
   0 -10 -11    8.25    3.29
   0  10 -11    7.39    1.63
   0 -10 -11    6.95    2.11
   0 -10  11    7.58    1.17
   0  10  11    6.11    3.23
   0 -11  11   -0.83    1.87
   0  11 -11   -0.19    2.09
   0  11  11    3.72    2.90
   0 -11 -11    2.31    2.12
   0  11 -11    0.24    1.50
   0 -11  11    6.21    1.88
   0  11  11    6.54    2.16
   0 -12  11   17.30    3.38
   0  12 -11   20.30    2.37
   0  12  11   20.92    3.21
   0 -12 -11   18.52    3.70
   0  12 -11   20.42    1.66
   0 -12  11   18.51    1.79
   0  12  11   15.71    2.28
   0 -13  11    1.68    1.98
   0  13 -11   -0.05    3.57
   0  13  11    1.10    3.01
   0 -13 -11    1.55    2.10
   0  13 -11   -0.69    1.38
   0 -13 -11   -1.46    2.10
   0  13  11   -3.47    3.25
   0 -14  11   63.41    2.91
   0  14 -11   64.12    3.16
   0  14  11   63.66    2.72
   0 -14 -11   66.88    4.64
   0 -14 -11   78.52    3.39
   0 -14  11   68.04    2.57
   0  14  11   80.32    4.76
   0 -15  11   -2.32    3.40
   0  15 -11   -2.53    2.33
   0  15  11    2.22    1.95
   0 -15 -11    1.47    3.50
   0  15 -11    0.53    1.22
   0 -15 -11    2.18    2.07
   0 -15  11    0.20    1.32
   0  15  11   -2.02    1.95
   0 -16  11   39.88    4.06
   0  16 -11   43.44    4.67
   0  16  11   42.72    3.93
   0 -16 -11   43.99    2.91
   0  16 -11   41.89    1.72
   0 -16 -11   47.96    4.70
   0 -16  11   48.93    1.94
   0  16  11   46.39    2.62
   0 -17  11   -4.31    3.51
   0  17 -11    2.21    2.42
   0  17  11   -0.13    1.95
   0 -17 -11    0.93    3.67
   0  17 -11   -0.31    1.10
   0 -17  11   -1.85    1.20
   0  17  11    5.46    3.26
   0 -18  11   -0.67    2.28
   0  18 -11    2.53    4.16
   0  18  11   -1.87    3.28
   0 -18 -11    1.11    3.79
   0  18 -11    1.65    1.01
   0 -18 -11    1.53    3.85
   0 -18  11    0.46    1.12
   0  18  11    1.05    3.22
   0 -19  11    1.92    2.32
   0  19 -11    3.33    4.22
   0  19  11   -0.37    2.11
   0 -19 -11    0.76    3.85
   0  19 -11    0.31    0.86
   0 -19 -11   -1.63    2.10
   0 -19  11   -0.50    0.92
   0  19  11    1.08    2.01
   0 -20  11    1.30    2.46
   0  20 -11    1.87    2.80
   0  20  11    4.83    3.51
   0 -20 -11    2.84    2.59
   0  20 -11    1.52    1.02
   0 -20 -11    2.21    3.33
   0 -20  11    2.61    0.77
   0  20  11    3.36    2.06
   0  21 -11    5.21    4.53
   0  21  11    1.10    3.64
   0 -21 -11   -0.28    2.59
   0  21 -11    0.43    2.51
   0 -21 -11    4.26    3.28
   0 -21  11    0.47    0.53
   0  21  11    0.14    1.97
   0 -21  11    0.59    0.64
   0  22 -11   19.01    4.89
   0  22  11   19.44    2.56
   0 -22 -11   18.38    2.90
   0  22 -11   13.90    2.87
   0 -22 -11   20.59    4.04
   0  22  11   16.77    3.49
   0  23 -11   -0.17    4.74
   0  23  11    1.18    3.72
   0 -23 -11   -1.87    2.73
   0  23 -11    7.70    4.42
   0 -23 -11    0.80    3.39
   0  23  11    0.54    3.26
   0  24 -11   10.22    3.24
   0  24  11   13.33    4.12
   0 -24 -11    8.21    3.04
   0  24 -11   10.51    4.77
   0 -24 -11    9.68    2.20
   0  24  11   10.45    3.44
   0  25 -11    4.92    3.17
   0  25  11    5.33    4.13
   0 -25 -11    5.01    2.92
   0  25 -11    2.93    4.63
   0 -25 -11   -7.34    3.82
   0  25  11    0.81    3.38
   0  25  11    1.06    3.37
   0  26 -11    6.65    3.30
   0  26  11   -0.79    4.28
   0 -26 -11   -0.46    3.01
   0  26 -11   -1.50    4.63
   0 -26 -11   -5.18    2.45
   0  26  11   -1.11    3.38
   0  27 -11    0.01    3.10
   0  27  11   -0.14    2.72
   0 -27 -11   -0.75    2.99
   0  27 -11    2.96    4.93
   0 -27 -11   -5.70    3.51
   0  27  11    3.48    3.39
   0   0  12  638.06   14.85
   0   0 -12  619.74   15.75
   0   0 -12  633.93   14.53
   0   0  12  620.06   13.10
   0  -1  12   -0.41    1.71
   0   1  12    3.33    1.70
   0   1 -12   -1.17    1.89
   0  -1 -12    0.98    1.87
   0   1 -12   -2.25    2.64
   0  -1 -12    2.90    1.73
   0  -1  12    1.22    2.82
   0   1  12   -2.56    1.90
   0  -2  12  111.89    4.32
   0   2  12  109.84    4.26
   0   2 -12  107.44    4.62
   0  -2 -12  106.62    4.63
   0   2 -12  105.58    2.80
   0  -2 -12  107.58    4.34
   0  -2  12  104.49    2.96
   0   2  12   99.77    4.61
   0  -3  12    0.32    1.71
   0   3  12    0.44    1.69
   0   3 -12   -1.09    1.85
   0  -3 -12    0.79    2.98
   0   3 -12   -1.23    1.44
   0  -3 -12   -0.08    1.77
   0  -3  12   -0.72    1.52
   0   3  12   -2.74    1.80
   0  -4  12   12.49    2.94
   0   4  12    9.95    2.92
   0   4 -12   10.13    3.27
   0  -4 -12   10.72    1.96
   0   4 -12    9.72    2.27
   0  -4 -12    9.53    1.94
   0  -4  12   11.53    1.57
   0   4  12   11.64    3.15
   0  -5  12    1.70    1.74
   0   5  12   -1.50    1.69
   0   5 -12    2.77    1.93
   0  -5 -12   -4.42    3.10
   0   5 -12    0.53    2.07
   0  -5 -12   -2.59    3.04
   0  -5  12   -0.48    2.29
   0   5  12   -0.91    1.85
   0  -6  12  181.56    5.61
   0   6 -12  179.09    4.67
   0   6  12  184.47    4.28
   0  -6 -12  182.59    6.21
   0   6 -12  179.81    3.52
   0  -6 -12  182.40    4.25
   0  -6  12  184.67    4.82
   0   6  12  185.14    5.91
   0  -7  12    2.88    1.76
   0   7 -12   -3.36    3.28
   0   7  12   -0.83    2.89
   0  -7 -12    2.89    1.92
   0   7 -12   -0.54    1.17
   0  -7 -12   -2.10    1.99
   0  -7  12   -4.79    2.19
   0   7  12   -2.16    1.94
   0  -8  12    0.89    3.05
   0   8 -12   -1.09    3.43
   0   8  12    6.06    2.93
   0  -8 -12    5.57    3.45
   0   8 -12    1.16    1.97
   0  -8  12    1.08    2.32
   0  -9  12   -0.21    1.91
   0   9 -12    3.53    3.50
   0   9  12    0.16    3.06
   0  -9 -12    1.50    2.11
   0   9 -12    0.57    1.90
   0  -9  12    4.79    2.22
   0   9  12    3.50    2.30
   0 -10  12    0.13    3.31
   0  10 -12    0.68    3.60
   0  10  12    3.05    1.86
   0 -10 -12    4.95    3.44
   0  10 -12    0.72    1.74
   0 -10  12    0.97    1.98
   0  10  12   -4.45    3.46
   0 -11  12   -1.96    3.28
   0  11 -12    0.18    3.68
   0  11  12    1.43    3.07
   0 -11 -12   -2.19    2.18
   0  11 -12   -1.93    1.05
   0 -11 -12   -8.51    3.67
   0 -12  12   22.60    2.43
   0  12 -12   25.52    2.63
   0  12  12   28.07    3.49
   0 -12 -12   28.26    3.96
   0  12 -12   26.28    1.95
   0 -13  12    0.35    3.35
   0  13 -12    1.24    2.36
   0  13  12    1.09    3.10
   0 -13 -12    2.64    2.19
   0  13 -12    0.20    1.50
   0 -13 -12   -7.16    3.58
   0 -13  12    1.13    1.71
   0  13  12   -5.16    3.45
   0 -14  12    4.48    3.47
   0  14 -12    1.56    4.00
   0  14  12    2.18    3.38
   0 -14 -12    7.03    3.72
   0  14 -12    5.26    1.47
   0 -14 -12   -3.45    3.76
   0 -14  12    1.65    1.76
   0  14  12    1.04    3.57
   0 -15  12   -0.71    3.52
   0  15 -12    1.40    2.52
   0  15  12    0.58    2.01
   0 -15 -12    1.46    2.31
   0  15 -12    0.36    0.84
   0 -15  12    1.62    1.72
   0  15  12    3.67    2.29
   0 -16  12   45.91    2.86
   0  16 -12   50.88    3.28
   0  16  12   48.16    4.02
   0 -16 -12   45.53    3.06
   0  16 -12   41.10    1.84
   0 -16 -12   44.80    2.92
   0 -16  12   49.07    2.02
   0  16  12   45.20    4.26
   0 -17  12   -0.77    2.31
   0  17 -12   -3.18    4.38
   0  17  12    2.82    2.07
   0 -17 -12    0.64    3.80
   0  17 -12    0.68    1.21
   0 -17 -12    1.96    2.39
   0 -17  12    3.27    1.48
   0  17  12    6.77    3.53
   0 -18  12    4.03    2.48
   0  18 -12    7.62    4.50
   0  18  12    7.17    3.50
   0 -18 -12   12.08    3.98
   0  18 -12    4.97    1.21
   0 -18 -12    2.83    3.68
   0 -18  12    7.63    1.26
   0  18  12    8.16    3.48
   0 -19  12   -2.09    2.32
   0  19 -12   -0.31    2.63
   0  19  12    1.05    2.18
   0 -19 -12    0.30    2.50
   0  19 -12    1.23    1.03
   0 -19 -12    1.74    3.56
   0 -19  12   -0.16    1.14
   0  19  12   -0.72    2.10
   0 -20  12    1.91    2.48
   0  20 -12    3.28    4.60
   0  20  12    2.92    3.59
   0 -20 -12   -2.64    2.62
   0  20 -12    1.33    0.88
   0 -20 -12   -0.51    2.29
   0 -20  12    0.47    1.01
   0  20  12    3.61    3.41
   0 -21  12    0.03    2.65
   0  21 -12    0.94    4.66
   0  21  12   -1.16    2.24
   0 -21 -12   -0.88    2.65
   0 -21 -12    8.33    4.10
   0 -21  12    0.16    0.78
   0  21  12    5.28    3.49
   0  22 -12    4.53    3.02
   0  22  12   -1.66    3.77
   0 -22 -12    1.67    2.74
   0  22 -12    0.60    2.74
   0 -22 -12   -5.84    3.66
   0  22  12    2.08    3.46
   0  23 -12   -1.79    3.11
   0  23  12    6.23    3.88
   0 -23 -12    1.34    4.42
   0  23 -12   -1.07    2.82
   0 -23 -12   -0.88    2.25
   0  23  12    1.56    3.50
   0  24 -12   -0.25    5.06
   0  24  12   -3.47    4.12
   0 -24 -12    4.48    4.85
   0  24 -12   -0.10    2.91
   0 -24 -12  -10.73    4.19
   0  24  12   -0.33    2.24
   0  25 -12    2.13    5.16
   0  25  12   -0.53    2.58
   0 -25 -12   -0.83    4.83
   0  25 -12   -0.57    2.99
   0 -25 -12   -6.18    2.73
   0  25  12   -0.26    2.23
   0  26 -12   20.58    5.94
   0  26  12   22.55    2.96
   0 -26 -12   21.93    5.46
   0  26 -12   28.12    5.36
   0 -26 -12   17.21    4.33
   0  26  12   23.09    2.63
   0   0  13    1.05    1.78
   0   0 -13    0.22    2.08
   0   0 -13    4.67    2.79
   0   0  13   -2.25    2.99
   0  -1  13    1.83    2.92
   0   1  13   -0.95    2.93
   0   1 -13   -0.84    3.36
   0  -1 -13    0.58    3.31
   0   1 -13    0.89    1.65
   0  -1 -13   -1.56    1.78
   0  -1  13   -2.22    1.81
   0   1  13    0.22    1.91
   0  -2  13   89.86    2.95
   0   2  13   90.37    4.39
   0   2 -13   93.33    3.34
   0  -2 -13   90.92    3.22
   0   2 -13   94.90    3.93
   0  -2 -13   88.66    4.25
   0  -2  13   88.97    2.97
   0   2  13   87.37    3.10
   0  -3  13    0.65    3.09
   0   3  13   -0.94    1.78
   0   3 -13    0.83    2.04
   0  -3 -13    1.06    3.32
   0   3 -13   -4.87    2.57
   0  -3 -13   -5.37    1.91
   0  -3  13    1.44    2.95
   0   3  13   -6.08    3.50
   0  -4  13  215.47    4.81
   0   4  13  203.46    6.13
   0   4 -13  193.98    6.81
   0  -4 -13  207.27    5.18
   0   4 -13  207.53    4.34
   0  -4 -13  198.95    6.96
   0  -4  13  223.71    6.24
   0   4  13  211.74    5.20
   0  -5  13    1.30    1.93
   0   5  13    1.16    3.09
   0   5 -13    6.27    3.72
   0  -5 -13   -4.40    3.37
   0   5 -13    2.57    1.52
   0  -5  13    4.15    2.83
   0  -6  13   16.71    3.55
   0   6  13   20.75    2.10
   0   6 -13   20.68    2.40
   0  -6 -13   21.24    2.43
   0   6 -13   20.50    1.66
   0  -6 -13   14.54    2.71
   0  -6  13   15.41    2.91
   0   6  13   13.61    2.49
   0  -7  13   -1.81    2.06
   0   7 -13   -3.45    2.26
   0   7  13    0.04    1.89
   0  -7 -13   -0.27    2.17
   0   7 -13   -3.17    2.17
   0  -7 -13   -7.37    3.63
   0  -7  13   -2.10    2.44
   0   7  13   -0.64    3.60
   0  -8  13  257.65    7.53
   0   8 -13  253.59    6.37
   0   8  13  256.86    5.70
   0  -8 -13  250.75    8.03
   0   8 -13  250.67    5.85
   0  -8 -13  254.45    8.13
   0  -8  13  255.52    6.40
   0   8  13  250.97    6.20
   0  -9  13   -7.72    3.53
   0   9 -13   -3.93    2.38
   0   9  13    2.87    1.96
   0  -9 -13   -0.97    2.24
   0   9 -13    3.24    2.10
   0  -9 -13    7.10    4.56
   0 -10  13  113.28    3.52
   0  10 -13  111.63    3.97
   0  10  13  112.90    3.43
   0 -10 -13  112.28    5.51
   0  10 -13  109.30    2.52
   0 -10 -13  108.25    6.64
   0 -10  13  110.49    4.05
   0  10  13  103.30    4.18
   0 -11  13   -2.59    3.58
   0  11 -13   -2.57    2.46
   0  11  13   -0.84    1.98
   0 -11 -13    2.70    3.80
   0  11 -13   -1.58    1.77
   0 -11 -13   -4.21    3.90
   0 -11  13   -0.21    1.28
   0  11  13   -1.51    3.66
   0 -12  13   55.75    4.41
   0  12 -13   54.11    4.84
   0  12  13   54.53    2.74
   0 -12 -13   56.76    3.20
   0  12 -13   52.06    2.39
   0 -12 -13   41.44    4.79
   0 -12  13   51.36    2.84
   0  12  13   53.95    3.12
   0 -13  13    0.58    2.25
   0  13 -13   -0.79    4.13
   0  13  13   -0.79    2.09
   0 -13 -13    1.48    3.87
   0  13 -13   -0.53    1.06
   0 -13  13    4.82    2.18
   0  13  13    8.82    4.03
   0 -14  13  156.40    4.51
   0  14 -13  153.20    5.05
   0  14  13  155.52    5.82
   0 -14 -13  152.54    4.88
   0  14 -13  157.90    3.81
   0 -14 -13  143.89    6.76
   0 -14  13  163.77    4.00
   0  14  13  154.93    6.40
   0 -15  13   -0.60    2.32
   0  15 -13    1.19    4.30
   0  15  13   -3.66    3.36
   0 -15 -13   -0.67    2.46
   0  15 -13    1.37    0.92
   0 -15 -13    1.72    4.27
   0 -15  13    1.80    1.89
   0  15  13    1.15    2.33
   0 -16  13    4.17    3.83
   0  16 -13   -0.75    2.76
   0  16  13    1.07    2.20
   0 -16 -13    5.45    3.84
   0  16 -13    3.04    1.46
   0 -16 -13   -1.01    4.02
   0 -16  13    1.14    1.68
   0  16  13    3.52    3.80
   0 -17  13   -1.25    3.94
   0  17 -13    1.24    4.49
   0  17  13    0.28    3.53
   0 -17 -13   -2.01    4.09
   0  17 -13    0.06    1.37
   0 -17 -13   -2.11    2.35
   0 -17  13    0.01    1.45
   0  17  13   -1.14    3.63
   0 -18  13   21.08    4.41
   0  18 -13   24.60    3.25
   0  18  13   25.34    2.55
   0 -18 -13   22.72    2.94
   0 -18 -13   26.91    2.64
   0 -18  13   26.46    1.73
   0  18  13   23.34    2.65
   0 -19  13    0.33    4.03
   0  19 -13    1.75    4.63
   0  19  13    2.80    3.70
   0 -19 -13   -2.46    2.56
   0  19 -13   -0.17    1.26
   0 -19 -13   -2.78    4.03
   0 -19  13   -0.92    1.38
   0  19  13    0.37    2.29
   0 -20  13   33.66    4.75
   0  20 -13   32.67    3.44
   0  20  13   33.65    2.68
   0 -20 -13   28.33    4.93
   0 -20 -13   45.33    4.94
   0 -20  13   34.60    1.75
   0  20  13   36.58    4.27
   0 -21  13    3.39    4.37
   0  21 -13    3.60    4.94
   0  21  13    3.18    3.73
   0 -21 -13   -0.67    4.48
   0 -21 -13   -2.44    2.41
   0  21  13    1.36    3.67
   0  22 -13   10.68    5.32
   0  22  13   15.69    4.21
   0 -22 -13   16.08    5.01
   0 -22 -13   15.22    4.31
   0  22  13   21.46    3.98
   0  23 -13    3.22    5.11
   0  23  13   -1.06    2.58
   0 -23 -13    2.40    4.72
   0  23 -13    0.72    4.72
   0 -23 -13   -0.62    4.84
   0  23  13    0.58    2.33
   0  24 -13    2.56    3.49
   0  24  13    3.64    2.69
   0 -24 -13    3.03    4.94
   0  24 -13    5.68    4.91
   0 -24 -13   -3.36    2.96
   0  24  13    5.65    2.48
   0  25 -13   -1.46    3.34
   0  25  13    0.22    5.04
   0 -25 -13    1.37    5.03
   0  25 -13    1.49    3.13
   0 -25 -13   -4.57    4.23
   0  25  13    1.55    3.87
   0   0  14  609.12   13.22
   0   0 -14  617.65   16.97
   0   0 -14  601.70   12.84
   0   0  14  608.98   13.42
   0  -1  14    2.50    2.12
   0   1  14    7.52    3.44
   0   1 -14    2.63    3.76
   0  -1 -14    2.95    2.34
   0   1 -14    1.23    3.02
   0  -1 -14    1.32    3.32
   0   1  14    0.30    3.51
   0  -1  14    0.70    2.04
   0  -2  14  584.45   14.60
   0   2  14  570.02   12.25
   0   2 -14  562.30   13.38
   0  -2 -14  579.31   15.70
   0   2 -14  578.76   13.77
   0  -2 -14  574.70   12.44
   0  -2  14  575.55   14.44
   0   2  14  580.25   15.02
   0  -3  14   10.00    3.52
   0   3  14    3.36    2.04
   0   3 -14    0.74    2.29
   0  -3 -14    0.83    2.29
   0   3 -14   -0.75    1.71
   0  -3 -14   -4.22    3.48
   0  -4  14   60.89    2.80
   0   4  14   64.09    4.11
   0   4 -14   64.56    4.72
   0  -4 -14   61.07    4.62
   0   4 -14   55.50    3.55
   0  -4 -14   47.54    4.82
   0  -4  14   54.91    4.30
   0   4  14   41.00    5.32
   0  -5  14   -6.55    3.44
   0   5  14    0.60    3.25
   0  -5 -14    1.07    2.32
   0   5 -14    3.78    2.73
   0  -5 -14    4.61    2.56
   0  -6  14  300.43    8.54
   0   6  14  289.31    8.28
   0   6 -14  297.12    7.50
   0  -6 -14  292.21    9.32
   0   6 -14  296.27    7.47
   0  -6 -14  331.24   10.03
   0  -6  14  304.63    8.57
   0   6  14  312.92   10.33
   0  -7  14   -0.62    2.17
   0   7 -14    2.45    2.39
   0  -7 -14    2.20    3.71
   0   7 -14   -1.13    2.52
   0  -8  14   64.47    4.52
   0   8 -14   58.20    3.38
   0   8  14   63.92    2.84
   0  -8 -14   65.47    3.19
   0   8 -14   65.07    3.08
   0  -8 -14   57.87    4.92
   0  -8  14   59.49    3.47
   0   8  14   65.41    3.27
   0  -9  14    2.44    3.49
   0   9 -14    2.09    2.47
   0   9  14   -0.82    2.04
   0  -9 -14   -0.76    3.78
   0   9 -14    1.35    1.31
   0  -9 -14   -1.30    2.35
   0  -9  14   -4.69    2.51
   0   9  14   -1.27    3.97
   0 -10  14    2.27    2.21
   0  10 -14    6.53    4.11
   0  10  14    1.86    3.32
   0 -10 -14    5.56    2.41
   0  10 -14    0.77    1.34
   0 -10 -14   -2.58    2.99
   0 -10  14    9.90    2.86
   0  10  14    3.80    2.63
   0 -11  14    0.99    2.19
   0  11 -14   -2.63    4.16
   0  11  14    0.58    3.26
   0 -11 -14    5.12    3.92
   0  11 -14    2.15    1.99
   0 -11 -14    1.81    2.91
   0 -11  14   -1.03    1.50
   0  11  14   -2.41    4.16
   0 -12  14   44.43    2.95
   0  12 -14   53.14    5.13
   0  12  14   46.10    4.10
   0 -12 -14   46.86    4.98
   0  12 -14   49.40    1.78
   0 -12 -14   43.72    3.39
   0 -12  14   52.73    2.89
   0  12  14   46.57    4.89
   0 -13  14   -1.31    3.82
   0  13 -14   -1.86    2.71
   0  13  14   -3.25    3.41
   0 -13 -14    1.00    2.43
   0  13 -14    0.71    1.80
   0 -13 -14   -0.94    2.82
   0 -13  14    2.08    2.28
   0  13  14    0.77    2.52
   0 -14  14   12.32    4.12
   0  14 -14   18.39    4.62
   0  14  14   12.65    2.32
   0 -14 -14   10.78    4.22
   0  14 -14   11.30    1.85
   0 -14 -14   10.81    2.90
   0 -14  14   13.41    2.23
   0  14  14   13.32    4.35
   0 -15  14    0.72    3.94
   0  15 -14    2.23    2.78
   0  15  14   -0.16    3.59
   0 -15 -14    3.36    4.09
   0  15 -14    2.78    1.64
   0 -15 -14    0.91    4.18
   0 -15  14    0.92    1.87
   0  15  14    4.64    2.42
   0 -16  14   41.75    3.06
   0  16 -14   48.22    3.48
   0  16  14   45.67    4.38
   0 -16 -14   41.50    3.24
   0  16 -14   37.60    2.12
   0 -16 -14   49.61    4.89
   0 -16  14   48.66    2.32
   0  16  14   37.98    3.00
   0 -17  14   -0.94    2.56
   0  17 -14   -2.93    4.82
   0  17  14    1.27    2.29
   0 -17 -14    1.13    2.64
   0  17 -14   -0.02    1.54
   0 -17 -14    0.28    4.01
   0 -17  14   -1.10    1.64
   0  17  14   -0.10    3.85
   0 -18  14   91.26    4.01
   0  18 -14   88.85    6.52
   0  18  14   95.69    5.23
   0 -18 -14   88.55    6.08
   0 -18 -14   99.42    6.13
   0 -18  14  104.23    3.10
   0  18  14   90.80    3.88
   0 -19  14    3.90    2.66
   0  19 -14   -1.81    3.03
   0  19  14    0.24    2.41
   0 -19 -14    2.37    4.45
   0  19 -14    0.00    1.40
   0 -19 -14   -0.84    2.62
   0 -19  14   -0.01    1.62
   0  19  14    0.20    2.47
   0 -20  14    1.90    2.78
   0  20 -14   -0.52    4.94
   0  20  14   -0.38    3.97
   0 -20 -14   -0.87    4.48
   0 -20 -14   -1.00    4.29
   0 -20  14    1.44    1.44
   0  20  14    1.62    3.94
   0 -21  14   -2.20    2.78
   0  21 -14    0.62    3.22
   0  21  14    3.46    4.07
   0 -21 -14    0.76    4.73
   0 -21 -14    0.73    4.40
   0  21  14   -1.60    4.06
   0 -22  14  169.14    5.55
   0  22 -14  165.13    6.32
   0  22  14  176.14    5.37
   0 -22 -14  167.56    6.10
   0 -22 -14  182.33    6.26
   0  22  14  175.61    5.35
   0  23 -14    0.15    5.55
   0  23  14   -2.13    4.31
   0 -23 -14    2.83    3.10
   0 -23 -14    7.76    5.11
   0  23  14    0.25    2.54
   0  24 -14    1.59    5.62
   0  24  14    2.48    4.29
   0 -24 -14    4.65    3.12
   0  24 -14    4.28    5.14
   0 -24 -14   -2.04    4.54
   0  24  14   -3.68    4.13
   0   0  15    3.52    3.46
   0   0 -15    0.79    3.95
   0   0 -15   -1.85    3.27
   0   0  15   -2.97    2.20
   0  -1  15   -3.89    3.55
   0   1  15   -0.04    2.11
   0   1 -15    0.99    2.44
   0  -1 -15   -2.87    3.87
   0   1 -15   -1.67    3.18
   0  -1 -15   -2.40    2.08
   0   1  15   -1.80    2.30
   0  -1  15   -1.65    3.44
   0  -2  15   54.70    2.84
   0   2  15   51.78    2.75
   0   2 -15   51.12    3.25
   0  -2 -15   50.61    3.10
   0   2 -15   54.28    2.52
   0  -2 -15   56.64    4.42
   0  -2  15   53.78    4.14
   0   2  15   54.49    4.55
   0  -3  15    0.29    2.09
   0   3  15    0.29    1.97
   0   3 -15   -2.07    4.03
   0  -3 -15   -0.26    3.86
   0   3 -15    1.74    2.94
   0  -3 -15   -3.39    3.67
   0  -3  15   -2.35    3.20
   0   3  15   -3.06    3.82
   0  -4  15   27.02    3.90
   0   4 -15   27.21    4.43
   0  -4 -15   34.05    4.45
   0   4 -15   25.71    3.29
   0  -4 -15   28.98    2.68
   0  -4  15   26.95    2.38
   0   4  15   32.10    2.88
   0  -5  15    1.64    3.58
   0   5 -15   -9.16    4.18
   0  -5 -15   -0.93    2.47
   0   5 -15    0.43    1.71
   0  -5  15   -1.02    2.05
   0   5  15   -9.87    4.10
   0  -6  15    0.65    2.24
   0   6  15    1.88    3.43
   0   6 -15   -2.37    4.20
   0  -6 -15    3.92    4.01
   0   6 -15   -0.57    1.75
   0  -6  15    7.33    2.19
   0   6  15    9.71    4.61
   0  -7  15    2.87    2.22
   0   7  15    2.09    3.48
   0   7 -15    2.27    4.21
   0  -7 -15   -0.35    3.94
   0   7 -15    4.24    1.76
   0  -7  15    5.05    2.15
   0  -8  15   29.54    3.93
   0   8  15   30.42    3.86
   0   8 -15   25.21    4.70
   0  -8 -15   28.65    2.88
   0   8 -15   29.37    1.93
   0  -8  15   23.60    3.29
   0   8  15   13.62    4.96
   0  -9  15    0.06    3.81
   0   9 -15   -4.46    4.58
   0  -9 -15    0.89    4.04
   0   9 -15   -1.86    1.42
   0  -9 -15   -6.26    2.68
   0  -9  15    2.37    2.76
   0   9  15   -2.60    2.74
   0 -10  15   47.82    4.65
   0  10 -15   49.17    5.38
   0  10  15   47.34    4.24
   0 -10 -15   47.06    3.23
   0  10 -15   48.38    2.82
   0 -10 -15   54.60    3.52
   0 -10  15   52.46    3.55
   0  10  15   49.92    5.38
   0 -11  15    0.29    2.40
   0  11 -15    1.30    2.79
   0  11  15   -1.37    2.20
   0 -11 -15    3.51    2.54
   0  11 -15   -1.38    2.11
   0 -11 -15    4.77    2.85
   0 -11  15    3.18    2.70
   0  11  15    4.90    2.70
   0 -12  15   87.92    3.63
   0  12 -15   87.81    4.15
   0  12  15   90.65    3.37
   0 -12 -15   89.43    5.75
   0  12 -15   82.21    2.41
   0 -12 -15   85.30    4.03
   0 -12  15   88.52    2.58
   0  12  15   84.47    5.91
   0 -13  15    0.49    2.46
   0  13 -15   -8.88    4.66
   0  13  15    0.29    2.16
   0 -13 -15    0.54    4.16
   0  13 -15   -1.95    1.96
   0 -13 -15    1.72    2.65
   0 -13  15   -0.11    2.21
   0  13  15    0.32    2.64
   0 -14  15    4.28    4.16
   0  14 -15   11.90    2.99
   0  14  15   12.66    3.85
   0 -14 -15   12.52    2.81
   0  14 -15   10.84    1.31
   0 -14 -15   12.20    2.87
   0 -14  15   10.30    1.45
   0  14  15    9.87    2.68
   0 -15  15    1.01    4.12
   0  15 -15    0.04    2.78
   0  15  15    0.15    2.28
   0 -15 -15    1.43    2.67
   0  15 -15    0.69    1.77
   0 -15 -15    3.11    2.67
   0 -15  15   -0.90    2.09
   0  15  15    2.32    4.10
   0 -16  15   17.93    4.51
   0  16 -15   14.08    5.18
   0  16  15   18.56    2.50
   0 -16 -15   17.86    4.65
   0  16 -15   18.73    2.00
   0 -16 -15   21.63    3.05
   0 -16  15   23.82    2.47
   0  16  15   18.23    3.01
   0 -17  15    5.53    4.32
   0  17 -15   -1.04    2.96
   0  17  15   -4.10    3.68
   0 -17 -15   -1.45    4.46
   0  17 -15    0.76    1.66
   0 -17 -15   -1.74    4.66
   0 -17  15   -0.19    2.00
   0  17  15   -2.77    4.37
   0 -18  15   -1.43    4.47
   0  18 -15   -1.77    5.03
   0  18  15    1.95    2.42
   0 -18 -15    2.49    4.51
   0  18 -15   -0.61    1.65
   0 -18 -15    0.14    4.65
   0 -18  15    1.31    1.79
   0  18  15   -0.14    4.18
   0 -19  15    0.58    4.60
   0  19 -15    2.15    5.09
   0  19  15   -0.31    3.96
   0 -19 -15   -0.16    2.92
   0 -19 -15    2.67    4.51
   0 -19  15    1.41    1.76
   0  19  15    2.76    2.65
   0 -20  15   18.07    4.87
   0  20 -15   16.78    3.66
   0  20  15   18.69    4.42
   0 -20 -15   19.76    3.26
   0 -20 -15   14.99    3.38
   0  20  15   19.86    4.62
   0 -21  15   -0.69    4.67
   0  21 -15   -3.40    5.47
   0  21  15    0.23    2.55
   0 -21 -15    2.08    3.06
   0 -21 -15   -3.44    3.54
   0  21  15    5.36    4.27
   0 -22  15   -4.75    4.86
   0  22 -15   -0.92    5.66
   0  22  15    3.48    4.26
   0 -22 -15   -1.29    3.13
   0 -22 -15    9.45    5.41
   0  22  15    2.13    2.74
   0  23 -15   -3.79    3.55
   0  23  15    7.24    4.38
   0 -23 -15    3.47    5.14
   0 -23 -15   -3.68    2.98
   0  23  15    2.40    4.27
   0   0 -16   -0.46    3.93
   0   0  16   -0.17    4.07
   0  -1  16    0.06    2.17
   0   1  16    1.48    2.18
   0   1 -16   -2.11    2.62
   0  -1 -16   -1.96    2.57
   0  -1  16   -9.84    3.97
   0  -2  16   32.97    4.09
   0   2  16   30.80    2.50
   0  -2 -16   37.11    4.51
   0   2 -16   18.79    4.02
   0  -2  16   26.15    2.70
   0   2  16   26.17    3.01
   0  -3  16   -0.65    3.69
   0  -3 -16    3.51    4.07
   0   3 -16   -5.21    2.04
   0  -3  16   -1.53    2.20
   0   3  16   -7.93    4.37
   0  -4  16    8.37    3.87
   0   4 -16   14.97    4.48
   0  -4 -16   11.17    2.65
   0   4 -16   10.72    2.06
   0  -4 -16   -2.18    4.53
   0  -4  16   11.87    2.36
   0   4  16   14.19    4.60
   0  -5  16    0.64    2.30
   0   5 -16   -5.11    4.27
   0   5 -16    3.14    2.98
   0  -5  16    0.29    2.16
   0   5  16    7.20    2.82
   0  -6  16  105.91    3.86
   0   6  16  109.17    5.32
   0   6 -16  113.17    6.32
   0  -6 -16  105.51    6.16
   0   6 -16  109.69    4.57
   0  -6 -16  117.19    4.47
   0  -6  16  106.72    3.64
   0   6  16  109.54    6.72
   0  -7  16    0.58    2.35
   0  -7 -16    1.72    2.55
   0   7 -16    0.70    2.84
   0  -7 -16    0.15    2.83
   0  -7  16    4.21    2.04
   0   7  16    8.97    4.67
   0  -8  16   21.89    4.17
   0   8  16   20.55    3.98
   0   8 -16   24.46    4.90
   0  -8 -16   24.38    2.92
   0   8 -16   23.89    2.96
   0  -8 -16   24.18    3.19
   0  -8  16   25.29    2.22
   0   8  16   20.12    3.09
   0  -9  16   -3.74    3.84
   0   9  16    1.78    2.22
   0   9 -16   -1.99    4.51
   0  -9 -16    1.93    4.12
   0   9 -16    1.04    2.44
   0  -9 -16   -3.24    4.54
   0  -9  16   -2.25    2.82
   0   9  16    0.42    4.39
   0 -10  16   -1.74    3.89
   0  10  16   -0.86    2.29
   0  10 -16   -1.88    2.87
   0 -10 -16    3.40    4.21
   0  10 -16    0.41    2.31
   0 -10 -16   -1.76    4.57
   0 -10  16   -3.70    2.69
   0  10  16   -3.11    2.83
   0 -11  16    1.35    2.43
   0  11 -16   -1.96    2.95
   0  11  16    1.72    2.19
   0 -11 -16    2.21    2.64
   0  11 -16   -1.47    2.24
   0 -11 -16    4.66    4.53
   0 -11  16   -0.49    2.57
   0  11  16   -1.29    4.54
   0 -12  16    3.89    2.51
   0  12 -16    2.75    4.68
   0  12  16   -1.27    3.77
   0 -12 -16    3.20    2.76
   0  12 -16    1.50    1.38
   0 -12 -16    1.42    4.69
   0 -12  16    1.11    1.58
   0  12  16    2.96    2.87
   0 -13  16    2.16    2.58
   0  13 -16    0.63    4.73
   0  13  16    1.41    3.67
   0 -13 -16    2.06    4.46
   0  13 -16   -1.13    2.07
   0 -13 -16    1.51    4.69
   0 -13  16   -0.50    2.45
   0  13  16   -3.29    4.42
   0 -14  16   -0.91    2.69
   0  14 -16    1.75    3.05
   0  14  16    1.86    2.31
   0 -14 -16    4.65    4.53
   0  14 -16    0.17    1.29
   0 -14 -16    7.12    5.02
   0 -14  16    3.22    2.66
   0  14  16    4.78    2.92
   0 -15  16    1.51    2.61
   0  15 -16    1.66    4.78
   0  15  16   -2.40    3.79
   0 -15 -16   -0.80    2.73
   0  15 -16    0.21    1.97
   0 -15 -16   -1.78    5.02
   0 -15  16    0.40    2.37
   0  15  16   -1.92    4.68
   0 -16  16   11.12    2.95
   0  16 -16   10.27    3.28
   0  16  16   14.71    4.03
   0 -16 -16    8.96    3.04
   0  16 -16    7.93    2.08
   0 -16 -16   10.01    3.05
   0 -16  16    9.46    2.34
   0  16  16    9.28    2.93
   0 -17  16    1.63    2.82
   0  17 -16   -3.15    5.15
   0  17  16   -1.11    2.45
   0 -17 -16    0.21    2.96
   0  17 -16    0.77    1.84
   0 -17 -16    0.68    2.93
   0 -17  16    2.00    2.15
   0  17  16    0.87    2.75
   0 -18  16    1.58    2.91
   0  18 -16    0.52    3.27
   0  18  16    2.44    3.94
   0 -18 -16    6.16    4.76
   0  18 -16    1.84    1.81
   0 -18 -16    0.35    3.00
   0 -18  16    1.28    2.17
   0  18  16    1.14    4.54
   0 -19  16    2.51    2.89
   0  19 -16    1.04    5.43
   0  19  16   -1.32    2.59
   0 -19 -16   -1.48    4.89
   0  19  16    1.75    2.88
   0 -20  16    4.31    3.06
   0  20 -16    8.93    5.60
   0  20  16    7.88    4.34
   0 -20 -16    6.22    5.12
   0 -20 -16    4.45    5.98
   0  20  16   11.05    4.70
   0 -21  16   -0.23    3.08
   0  21 -16    4.62    3.54
   0  21  16    5.36    4.33
   0 -21 -16    0.94    5.07
   0 -21 -16   -5.55    3.20
   0  21  16   -3.44    4.66
   0 -22  16    7.39    3.28
   0  22  16    7.47    2.93
   0 -22 -16    8.30    5.39
   0 -22 -16    8.25    3.53
   0  22  16   10.59    2.57
   0   0  17   -1.78    3.76
   0   0 -17   -1.55    2.34
   0   0  17   -1.86    2.55
   0  -1  17    2.41    2.35
   0  -1 -17   -0.47    2.73
   0   1 -17   -1.07    3.59
   0  -1 -17   -4.72    3.77
   0  -1  17   -0.10    2.47
   0   1  17   -4.66    4.11
   0  -2  17   41.65    2.86
   0  -2 -17   38.63    3.29
   0   2 -17   35.76    2.59
   0  -2 -17   35.27    2.98
   0  -2  17   34.15    2.88
   0   2  17   30.93    4.98
   0  -3  17    1.30    2.40
   0  -3 -17    1.54    2.61
   0   3 -17   -1.41    3.20
   0  -3 -17   -2.13    2.54
   0  -3  17    2.91    3.61
   0   3  17   -1.41    2.61
   0  -4  17   40.90    2.92
   0   4 -17   34.97    5.24
   0  -4 -17   39.42    5.09
   0   4 -17   34.52    3.71
   0  -4 -17   38.40    4.79
   0  -4  17   41.06    4.11
   0   4  17   37.60    3.24
   0  -5  17   -0.59    2.43
   0   5 -17  -11.45    4.80
   0  -5 -17   -3.70    4.35
   0   5 -17   -0.58    1.82
   0  -5 -17    0.66    2.63
   0  -5  17    0.74    3.45
   0   5  17    4.09    4.40
   0  -6  17   36.34    4.64
   0   6  17   39.35    4.33
   0   6 -17   32.38    5.27
   0  -6 -17   33.56    3.28
   0   6 -17   35.15    2.24
   0  -6 -17   33.17    3.15
   0  -6  17   36.67    3.85
   0   6  17   34.32    3.28
   0  -7  17    1.84    3.90
   0   7  17    1.29    3.70
   0   7 -17   -7.23    4.70
   0  -7 -17    4.59    2.64
   0   7 -17    1.43    2.70
   0  -7 -17   -4.15    4.27
   0  -7  17    0.44    3.20
   0   7  17   -4.37    2.91
   0  -8  17    2.58    3.90
   0   8  17    1.91    2.36
   0   8 -17    2.76    4.64
   0  -8 -17    2.24    4.38
   0   8 -17    3.66    2.67
   0  -8 -17    6.41    4.62
   0  -8  17   -0.12    1.92
   0   8  17    2.34    4.67
   0  -9  17    0.82    4.10
   0   9  17   -1.22    2.23
   0   9 -17   -2.69    3.01
   0  -9 -17    3.98    4.47
   0   9 -17    3.92    2.52
   0  -9 -17   -2.31    4.82
   0  -9  17    0.73    1.81
   0   9  17   -3.00    2.89
   0 -10  17   71.84    5.33
   0  10  17   71.76    3.30
   0  10 -17   75.27    4.23
   0 -10 -17   70.58    5.79
   0  10 -17   72.36    3.58
   0 -10 -17   72.24    6.19
   0 -10  17   74.92    4.06
   0  10  17   72.13    6.31
   0 -11  17   -0.82    2.55
   0  11  17    1.97    4.13
   0  11 -17   -0.19    4.94
   0 -11 -17    1.33    2.79
   0  11 -17    0.33    1.50
   0 -11 -17    1.45    5.17
   0 -11  17    1.49    3.10
   0  11  17    5.85    3.20
   0 -12  17   15.80    2.95
   0  12 -17   19.49    5.20
   0  12  17   17.47    4.06
   0 -12 -17   18.41    3.19
   0  12 -17   17.23    2.65
   0 -12 -17   26.28    5.76
   0 -12  17   17.92    3.27
   0  12  17   23.18    5.32
   0 -13  17    1.24    2.72
   0  13 -17    0.72    3.12
   0  13  17    0.39    2.41
   0 -13 -17   -0.86    4.66
   0  13 -17    0.08    2.45
   0 -13 -17   -1.58    5.14
   0 -13  17   -0.36    2.66
   0  13  17    4.15    2.95
   0 -14  17    1.01    2.80
   0  14 -17    0.69    5.09
   0  14  17    4.36    3.94
   0 -14 -17    2.07    4.74
   0  14 -17    0.67    1.36
   0 -14 -17    4.42    4.95
   0 -14  17    0.29    2.59
   0  14  17   -4.99    4.79
   0 -15  17   -1.33    2.87
   0  15 -17   -0.61    3.28
   0  15  17   -2.69    4.06
   0 -15 -17    0.93    4.79
   0  15 -17    0.74    2.17
   0 -15 -17   -2.16    5.14
   0 -15  17    0.74    2.48
   0  15  17   -0.30    2.89
   0 -16  17   40.74    3.54
   0  16 -17   46.28    6.32
   0  16  17   40.80    3.13
   0 -16 -17   43.86    5.75
   0  16 -17   39.24    2.73
   0 -16 -17   33.11    6.17
   0 -16  17   47.76    3.20
   0  16  17   43.07    5.70
   0 -17  17    1.67    2.87
   0  17 -17   -2.72    3.41
   0  17  17   -2.36    4.21
   0 -17 -17    2.80    3.03
   0  17 -17    1.13    2.08
   0 -17  17   -0.88    2.49
   0  17  17   -0.61    3.11
   0 -18  17   21.58    3.35
   0  18 -17   21.92    6.09
   0  18  17   19.41    2.96
   0 -18 -17   21.15    3.43
   0 -18 -17    8.33    4.15
   0 -18  17   25.56    2.82
   0  18  17   19.64    5.39
   0 -19  17    2.77    3.03
   0  19 -17   -3.85    3.64
   0  19  17    2.43    4.39
   0 -19 -17   -2.23    3.24
   0 -19 -17   -3.82    3.59
   0  19  17    1.62    4.92
   0 -20  17   41.77    3.78
   0  20 -17   39.67    6.94
   0  20  17   42.64    3.40
   0 -20 -17   37.05    4.01
   0 -20 -17   37.20    4.25
   0  20  17   41.70    3.72
   0   0 -18  271.66    8.72
   0   0  18  252.23    6.92
   0   1 -18    3.65    2.34
   0  -1 -18   -2.55    4.01
   0  -1  18    0.23    4.16
   0   1  18    2.05    2.73
   0   2 -18   16.39    3.20
   0   2 -18   13.36    3.77
   0  -2 -18   11.43    2.72
   0   2  18   13.42    4.65
   0  -2  18   15.98    4.16
   0   3 -18    2.10    2.96
   0  -3 -18    5.55    4.62
   0   3 -18   -2.79    3.41
   0  -3  18    3.78    3.89
   0   3  18    4.95    4.48
   0  -4  18   10.38    4.31
   0   4 -18    8.01    5.00
   0  -4 -18   11.19    3.02
   0   4 -18   10.38    2.15
   0  -4 -18    9.94    2.82
   0  -4  18    6.64    3.88
   0   4  18    5.54    4.77
   0  -5  18   -3.88    4.19
   0   5 -18   -1.65    4.76
   0  -5 -18   -1.84    2.92
   0   5 -18   -0.64    3.17
   0  -5 -18    2.14    2.81
   0  -5  18   -5.06    3.72
   0   5  18   -3.04    2.93
   0  -6  18    9.23    4.17
   0   6  18    6.33    3.90
   0   6 -18    6.15    4.89
   0  -6 -18    4.88    2.96
   0   6 -18    4.32    3.22
   0  -6 -18    2.91    4.81
   0  -6  18    9.13    3.91
   0   6  18   -2.33    5.12
   0  -7  18   -8.25    4.14
   0   7  18   -3.21    4.04
   0   7 -18  -11.38    5.15
   0  -7 -18   10.52    4.85
   0   7 -18   -0.41    2.95
   0  -7 -18    1.09    4.95
   0  -7  18    4.58    3.82
   0   7  18   13.39    5.32
   0  -8  18   32.86    4.92
   0   8  18   34.52    2.88
   0   8 -18   39.03    5.48
   0  -8 -18   35.17    5.43
   0   8 -18   37.63    2.29
   0  -8 -18   49.19    6.11
   0  -8  18   38.05    4.32
   0   8  18   42.43    3.90
   0   9  18   -2.90    2.45
   0   9 -18    3.22    3.04
   0  -9 -18    1.25    4.79
   0   9 -18   -0.76    1.74
   0  -9 -18    0.83    3.30
   0  -9  18    0.25    2.09
   0   9  18  -11.27    5.19
   0 -10  18    1.08    2.77
   0  10  18    2.98    3.93
   0  10 -18    2.75    3.25
   0 -10 -18    5.83    3.02
   0  10 -18    5.11    1.71
   0 -10 -18    2.18    3.29
   0 -10  18    3.64    2.00
   0  10  18    2.33    3.12
   0 -11  18   -0.82    2.70
   0  11  18   -2.42    3.95
   0  11 -18   -2.66    5.33
   0 -11 -18   -0.83    3.00
   0  11 -18   -1.66    2.58
   0 -11 -18    0.88    3.16
   0 -11  18   -0.85    2.94
   0  11  18   -0.42    5.03
   0 -12  18    1.58    2.91
   0  12  18    1.87    2.45
   0  12 -18    0.87    3.30
   0 -12 -18   -1.21    3.08
   0  12 -18   -1.01    2.49
   0 -12 -18    2.21    3.25
   0 -12  18    1.99    2.88
   0  12  18   -4.27    5.05
   0 -13  18   -0.23    2.88
   0  13  18   -4.70    4.09
   0  13 -18   -2.82    3.36
   0 -13 -18   -1.46    3.08
   0  13 -18    1.17    2.47
   0 -13 -18   -0.61    3.32
   0 -13  18   -1.28    1.76
   0  13  18    0.78    3.22
   0 -14  18    9.50    3.01
   0  14  18    6.85    4.18
   0  14 -18    7.84    5.60
   0 -14 -18    0.84    5.16
   0  14 -18    5.60    1.56
   0 -14  18   10.20    2.96
   0  14  18    1.22    5.45
   0 -15  18   -2.67    2.90
   0  15 -18    1.58    3.46
   0  15  18   -2.22    2.71
   0 -15 -18   -6.95    5.12
   0  15 -18   -0.01    2.35
   0 -15  18    0.08    1.91
   0  15  18   -1.64    3.34
   0 -16  18    8.22    3.25
   0  16 -18    7.10    5.91
   0  16  18   13.28    4.58
   0 -16 -18    7.12    5.35
   0  16 -18    7.02    1.64
   0 -16 -18    6.41    4.04
   0 -16  18   12.56    2.94
   0  16  18    7.99    5.54
   0 -17  18    0.34    3.18
   0  17 -18    2.01    3.54
   0  17  18   -1.47    2.86
   0 -17 -18    2.19    5.22
   0  17 -18    2.28    2.28
   0 -17 -18   -6.28    5.94
   0 -17  18   -1.11    2.71
   0  17  18    4.54    5.17
   0 -18  18   57.91    6.29
   0  18 -18   61.98    7.30
   0  18  18   58.58    5.65
   0 -18 -18   56.48    6.49
   0 -18 -18   42.10    7.37
   0  18  18   53.18    4.08
   0   0  19    1.38    2.52
   0   0 -19    4.68    2.91
   0   0 -19    2.38    4.15
   0   0  19   -7.05    4.71
   0  -1  19    0.31    2.64
   0   1  19   -2.54    2.49
   0   1 -19    0.64    3.03
   0  -1 -19   -0.58    2.95
   0   1 -19   -0.66    2.39
   0  -1 -19    2.10    2.59
   0  -1  19   -6.02    4.48
   0   1  19    0.56    4.81
   0  -2  19   84.77    3.72
   0   2  19   80.67    3.70
   0   2 -19   82.29    4.43
   0  -2 -19   80.34    4.29
   0   2 -19   84.92    5.18
   0  -2 -19   81.22    5.99
   0  -2  19   78.48    5.83
   0   2  19   80.75    4.33
   0  -3  19   -1.33    2.67
   0   3 -19    0.44    3.07
   0  -3 -19   -1.25    3.09
   0   3 -19    0.79    2.22
   0  -3 -19   -2.85    2.82
   0  -3  19   -4.02    4.27
   0   3  19   -6.85    3.10
   0  -4  19    0.58    2.64
   0   4 -19   -0.92    3.17
   0  -4 -19   -2.93    3.09
   0   4 -19   -4.81    3.52
   0  -4 -19   -3.01    2.83
   0  -4  19   -2.51    4.02
   0   4  19   -3.60    4.96
   0  -5  19    3.49    2.70
   0   5 -19    1.42    3.10
   0  -5 -19    1.37    4.85
   0   5 -19    4.57    3.33
   0  -5 -19   -4.24    4.78
   0  -5  19    1.09    3.86
   0   5  19   -1.19    5.01
   0  -6  19    0.40    2.70
   0  -6 -19   -1.10    4.96
   0   6 -19    1.98    1.99
   0  -6 -19    5.02    5.00
   0  -6  19   -1.94    3.70
   0   6  19    2.98    3.16
   0  -7  19    0.20    2.69
   0   7  19    2.63    2.46
   0  -7 -19    6.29    4.82
   0   7 -19   -1.96    3.22
   0  -7 -19    1.39    5.11
   0  -7  19   -2.13    3.61
   0   7  19    6.71    5.10
   0  -8  19   19.64    3.07
   0   8  19   16.84    2.75
   0   8 -19   16.17    5.63
   0  -8 -19   19.73    5.32
   0   8 -19   13.23    3.31
   0  -8 -19   17.09    3.46
   0  -8  19   18.86    3.77
   0   8  19   13.38    5.55
   0  -9  19   -3.29    2.85
   0   9  19    1.31    2.69
   0   9 -19    0.57    3.27
   0  -9 -19    0.10    3.19
   0   9 -19    3.75    2.91
   0  -9 -19   -0.90    3.31
   0  -9  19   -1.36    3.38
   0   9  19    7.49    3.33
   0 -10  19  125.94    4.88
   0  10  19  135.48    6.56
   0  10 -19  131.58    8.39
   0 -10 -19  126.15    5.47
   0  10 -19  126.70    4.99
   0 -10 -19  133.92    5.68
   0 -10  19  130.54    4.04
   0  10  19  131.73    8.10
   0 -11  19   -1.26    2.90
   0 -11 -19    3.06    3.18
   0  11 -19    0.33    2.82
   0 -11  19    2.35    3.37
   0  11  19    0.77    3.56
   0 -12  19   28.49    3.31
   0  12  19   26.89    3.09
   0  12 -19   24.03    4.04
   0 -12 -19   25.17    3.84
   0  12 -19   28.45    3.18
   0 -12  19   26.43    3.69
   0  12  19   27.21    4.06
   0 -13  19    4.21    2.97
   0  13  19   -1.92    4.61
   0  13 -19  -15.66    5.87
   0 -13 -19   -1.34    3.35
   0  13 -19    0.93    1.68
   0 -13  19    1.33    2.00
   0  13  19   -2.29    5.69
   0 -14  19   29.50    3.48
   0  14  19   24.84    3.23
   0  14 -19   26.42    6.48
   0 -14 -19   22.46    6.04
   0  14 -19   20.60    3.12
   0 -14 -19   29.25    4.49
   0 -14  19   29.66    3.56
   0  14  19   27.56    4.01
   0 -15  19    0.08    3.72
   0  15 -19   -1.74    3.80
   0  15  19    7.61    4.76
   0 -15 -19    7.71    5.72
   0  15 -19   -0.64    2.61
   0 -15 -19   -3.15    3.72
   0 -15  19   -0.06    2.04
   0  15  19    0.88    5.63
   0 -16  19   97.21    4.75
   0  16  19   94.33    6.43
   0  16 -19   94.91    8.16
   0 -16 -19   90.98    7.44
   0  16 -19   86.35    3.17
   0 -16 -19   86.88    5.60
   0 -16  19  105.05    4.82
   0  16  19   89.05    5.11
   0   0 -20   29.68    2.98
   0   0  20   27.93    5.25
   0   1 -20    1.10    4.03
   0  -1 -20   -3.28    4.33
   0  -1  20   -0.43    2.84
   0   1  20    0.29    4.79
   0   2  20    7.53    2.71
   0   2 -20    5.90    2.46
   0  -2 -20    3.79    4.72
   0  -2  20    4.45    2.88
   0   2  20   11.11    5.09
   0   3  20    1.42    2.62
   0   3 -20    1.38    3.30
   0   3 -20    0.66    3.79
   0  -3 -20   -1.84    2.94
   0  -3  20   -0.21    2.65
   0   3  20   -1.43    3.13
   0   4  20    2.34    2.65
   0   4 -20    3.05    3.36
   0   4 -20    0.14    3.72
   0  -4 -20    1.60    4.78
   0  -4  20    4.35    2.69
   0   4  20    0.33    3.23
   0  -5  20   -6.91    4.98
   0   5 -20    1.00    3.32
   0   5 -20    0.79    2.26
   0  -5 -20   -1.18    5.08
   0  -5  20    0.82    2.69
   0   5  20   -3.09    5.62
   0  -6  20   56.02    5.45
   0   6 -20   52.57    6.73
   0  -6 -20   53.92    4.09
   0   6 -20   53.42    4.47
   0  -6 -20   49.88    4.26
   0  -6  20   62.05    3.52
   0   6  20   55.69    6.88
   0  -7  20   -0.48    4.69
   0   7  20    2.16    2.74
   0   7 -20  -10.39    5.89
   0  -7 -20   -0.76    3.20
   0   7 -20   -0.94    3.50
   0  -7  20    3.44    2.63
   0   7  20    1.11    3.55
   0  -8  20   13.06    4.98
   0   8  20   10.71    2.89
   0   8 -20    8.50    5.92
   0  -8 -20   10.13    3.49
   0   8 -20   11.12    2.24
   0  -8 -20   21.82    3.95
   0  -8  20    9.28    4.21
   0   8  20   10.05    3.80
   0  -9  20    4.12    2.92
   0   9  20   -3.12    4.59
   0   9 -20   -2.44    3.63
   0  -9 -20   -5.32    3.37
   0   9 -20   -0.70    2.01
   0  -9  20   -2.02    3.77
   0   9  20  -10.32    6.14
   0  10  20    4.75    4.60
   0  10 -20    4.49    5.87
   0 -10 -20    4.55    3.41
   0  10 -20    2.15    1.92
   0 -10  20   10.72    3.78
   0  10  20    3.95    3.77
   0 -11  20   -1.61    3.12
   0  11  20    3.63    2.82
   0  11 -20   -7.88    5.75
   0 -11 -20    1.78    3.31
   0  11 -20   -0.44    1.87
   0 -11  20   -0.74    2.17
   0  11  20   -4.74    5.87
   0 -12  20   25.39    3.48
   0  12  20   28.80    5.05
   0  12 -20   17.08    4.05
   0 -12 -20   23.93    3.97
   0  12 -20   20.01    2.13
   0 -12 -20   11.99    6.83
   0 -12  20   24.27    3.76
   0  12  20   21.32    6.29
   0 -13  20   -3.73    3.27
   0  13 -20   -0.06    2.90
   0 -13 -20   -5.08    6.71
   0 -13  20    0.21    3.11
   0  13  20   -4.58    3.78
   0   0 -21   -4.55    2.97
   0   0  21    3.23    3.29
   0   1 -21   -4.21    4.58
   0  -1 -21   -4.25    4.86
   0  -1  21   -0.09    3.20
   0   1  21    6.60    3.47
   0  -2  21   20.89    3.13
   0   2 -21   18.51    4.81
   0  -2 -21   16.75    3.50
   0   2  21   21.24    6.10
   0  -2  21   23.07    3.49
   0  -3  21    1.28    2.95
   0  -3 -21    2.56    3.42
   0   3 -21    1.49    4.39
   0  -3 -21    6.24    5.53
   0  -3  21    5.50    4.93
   0   3  21    9.53    5.69
   0  -4  21    2.14    2.99
   0   4  21    0.23    2.90
   0  -4 -21   -1.53    3.56
   0   4 -21    5.46    2.54
   0  -4 -21   17.80    5.71
   0  -4  21    4.89    4.82
   0   4  21   22.77    5.81
   0  -5  21    1.38    2.90
   0   5  21   -3.12    4.46
   0   5 -21    4.53    3.63
   0  -5 -21    0.72    3.45
   0   5 -21    0.21    3.94
   0  -5  21    1.19    2.91
   0   5  21    6.49    3.72
   0  -6  21    0.01    5.12
   0   6 -21   -2.51    3.72
   0  -6 -21    5.47    3.34
   0   6 -21   -4.99    3.84
   0  -6 -21   -2.21    3.62
   0  -6  21    1.53    2.75
   0   6  21    0.63    3.63
   0  -7  21    3.98    5.10
   0   7 -21    7.16    6.21
   0   7 -21    0.42    2.27
   0  -7 -21  -12.11    5.96
   0  -7  21   -0.22    2.68
   0   7  21    3.00    5.80
   0  -8  21   65.99    6.39
   0   8  21   72.86    3.97
   0   8 -21   69.46    7.67
   0  -8 -21   63.93    7.17
   0   8 -21   68.12    4.66
   0  -8 -21   70.98    7.55
   0  -8  21   70.58    3.69
   0   8  21   63.70    7.79
   0  -9  21    4.40    7.06
   0   9 -21    1.41    3.83
   0  -9 -21   16.47    6.20
   0   9 -21    3.34    3.47
   0  -9 -21  -14.14    6.60
   0  -9  21    2.88    4.28
   0   9  21   -0.12    3.98
  -1   2   0    0.64    0.45
   1  -2   0   -1.26    0.72
   1   2   0    0.20    0.51
   1  -2   0    0.41    0.42
  -1  -2   0    1.12    0.74
  -1   3   0   -0.14    0.80
   1  -3   0   -0.42    0.86
   1   3   0    1.81    0.98
   1  -3   0    0.63    0.45
  -1   3   0    0.67    0.27
  -1  -3   0    1.57    0.57
   1   3   0    2.09    0.97
  -1   4   0   -0.16    1.09
   1  -4   0    0.89    1.95
   1   4   0    0.89    1.40
  -1  -4   0    0.54    0.76
   1  -4   0    0.63    0.72
  -1   4   0    0.42    0.44
  -1  -4   0   -0.02    0.66
   1   4   0   -0.59    1.09
  -1   5   0    1.16    1.42
   1   5   0    0.63    1.95
  -1  -5   0    2.62    1.78
   1  -5   0    0.44    0.62
  -1   5   0    1.09    0.79
  -1  -5   0    0.92    1.33
   1   5   0    1.14    1.33
  -1   6   0   -1.40    1.46
   1   6   0    2.39    2.02
   1  -6   0    0.46    1.41
  -1  -6   0    0.86    1.93
   1  -6   0   -0.16    0.63
  -1   6   0    0.19    0.61
  -1  -6   0   -0.26    1.26
   1   6   0   -0.15    1.25
  -1   7   0    2.69    2.36
   1   7   0    0.37    1.20
   1  -7   0   -0.25    2.24
  -1  -7   0    0.15    1.13
   1  -7   0    0.16    0.59
  -1   7   0    0.70    0.79
  -1  -7   0   -0.05    1.14
   1   7   0    0.90    1.14
  -1   8   0    0.67    2.41
   1   8   0    1.12    2.05
   1  -8   0    1.13    1.34
  -1  -8   0   -0.94    1.14
   1  -8   0    0.70    0.59
  -1   8   0    0.30    0.58
  -1  -8   0    0.57    1.04
   1   8   0    0.80    1.08
  -1   9   0   -0.31    1.44
   1   9   0   -1.13    2.06
   1  -9   0    0.02    1.26
  -1  -9   0   -0.97    1.94
   1  -9   0   -0.51    0.83
  -1  -9   0   -0.84    1.01
  -1   9   0   -1.18    0.81
   1   9   0    1.00    1.09
  -1  10   0    0.18    1.49
   1  10   0   -0.67    1.28
   1 -10   0    1.26    2.26
  -1 -10   0   -0.37    1.99
   1 -10   0    0.48    0.63
  -1 -10   0    0.46    0.99
  -1  10   0    0.40    0.60
   1  10   0   -0.70    1.05
  -1  11   0    0.08    2.54
   1  11   0    3.77    2.18
   1 -11   0    0.33    1.39
  -1 -11   0    0.42    1.27
   1 -11   0   -0.51    0.88
  -1 -11   0   -0.08    0.95
  -1  11   0    0.19    0.86
   1  11   0    0.20    1.05
  -1  12   0    1.14    1.51
   1  12   0   -1.76    1.34
   1 -12   0   -0.58    2.40
  -1 -12   0    3.03    2.07
  -1  12   0   -0.15    0.86
   1  12   0    0.12    1.00
  -1  13   0   -1.67    2.59
   1  13   0    3.99    2.27
   1 -13   0   -0.41    1.47
  -1 -13   0    2.36    2.17
  -1 -13   0    0.04    0.93
  -1  13   0   -0.50    0.63
   1  13   0    0.39    1.00
  -1  14   0   -0.15    2.61
   1  14   0    0.69    1.39
   1 -14   0   -3.82    2.43
  -1 -14   0   -0.12    1.40
  -1 -14   0   -0.31    0.96
  -1  14   0   -0.50    0.66
   1  14   0    0.02    1.03
  -1  15   0    0.44    1.61
   1  15   0   -2.62    2.39
   1 -15   0    1.17    1.53
   1 -15   0   -0.12    0.83
  -1 -15   0   -0.73    0.87
  -1  15   0   -0.41    0.65
   1  16   0    0.25    1.39
  -1  16   0    0.27    2.70
   1  16   0    1.20    1.48
   1 -16   0    1.38    2.58
  -1 -16   0   -0.26    1.01
   1 -16   0    0.59    0.61
  -1 -16   0   -0.17    0.87
  -1  16   0    0.88    0.85
   1  17   0    0.21    1.47
  -1  17   0    0.24    1.73
   1  17   0    0.75    2.50
   1 -17   0    0.64    1.67
  -1 -17   0    0.42    1.35
   1 -17   0    1.61    0.70
  -1 -17   0    0.47    0.97
  -1  17   0    0.51    0.65
   1  18   0    1.81    2.54
   1  18   0   -0.39    1.67
  -1  18   0    0.57    3.07
   1 -18   0   -1.24    1.84
  -1 -18   0    0.11    1.04
   1 -18   0   -0.37    0.65
  -1 -18   0   -0.65    0.90
  -1  18   0   -0.19    0.65
   1  19   0   -0.53    1.73
  -1  19   0   -0.19    1.89
   1  19   0    3.36    2.87
  -1 -19   0    0.26    1.07
   1 -19   0   -0.45    0.67
  -1 -19   0    0.08    0.94
  -1  20   0    1.44    1.98
   1  20   0   -0.57    2.85
  -1  20   0    1.67    2.03
   1  20   0    2.11    1.83
   1 -20   0    0.26    0.69
  -1 -20   0    0.45    1.42
   1 -20   0   -1.35    0.88
  -1 -20   0   -0.48    0.98
  -1  21   0    2.55    3.30
   1  21   0    0.93    1.87
  -1  21   0   -1.09    3.44
   1  21   0    0.74    3.10
   1 -21   0    0.57    0.68
  -1 -21   0    0.76    1.05
  -1  22   0    1.72    2.14
   1  22   0    5.13    3.14
  -1  22   0   -0.07    2.25
   1  22   0    3.61    3.27
   1 -22   0   -0.25    0.65
  -1 -22   0   -0.73    1.06
   1 -22   0   -0.09    0.79
  -1 -22   0   -0.65    1.03
  -1  23   0   -0.32    3.46
   1  23   0   -1.26    2.01
  -1  23   0   -0.48    3.66
   1  23   0    2.84    2.04
   1 -23   0   -0.46    0.62
  -1 -23   0    1.27    1.06
   1 -23   0    0.54    0.60
  -1  24   0    5.47    2.39
   1  24   0   -0.11    3.43
   1  24   0   -2.86    3.40
  -1 -24   0   -0.02    1.43
   1 -24   0    1.02    0.76
   1 -24   0   -0.76    0.57
  -1 -24   0    0.50    1.20
  -1  25   0    3.58    3.87
   1  25   0    3.22    3.60
  -1  25   0    3.99    3.92
   1  25   0   -0.34    2.16
  -1  26   0    1.51    2.43
   1  26   0    1.86    2.30
  -1  26   0    1.02    2.57
   1  26   0    1.44    3.60
  -1 -26   0    0.70    1.38
  -1 -26   0   -1.13    1.00
  -1  27   0   -3.18    4.17
   1  27   0   -1.84    3.81
   1  27   0   -0.83    2.28
  -1  27   0   -0.88    4.15
  -1 -27   0    0.72    1.01
  -1 -27   0    0.76    1.02
  -1  28   0   10.30    2.74
   1  28   0   -0.31    2.51
  -1  28   0    0.47    2.66
   1  28   0    3.05    3.89
  -1  29   0    0.64    4.42
   1  29   0    2.31    4.13
  -1  29   0    3.34    4.43
   1  29   0    3.13    2.51
  -1  30   0    0.91    2.88
   1  30   0    2.12    2.66
  -1  30   0    1.76    2.90
   1  30   0   -4.59    4.25
  -1  31   0   -0.89    4.84
   1  31   0    3.29    4.38
  -1  31   0   -3.92    4.87
   1  31   0   -1.14    2.63
  -1  32   0    2.63    3.10
   1  32   0    5.32    3.00
  -1  32   0    4.23    5.00
   1  32   0    5.34    4.53
   1   0   1    0.07    0.36
  -1   0   1   -0.26    0.40
   1   0  -1    0.26    0.36
   1   0  -1    0.30    0.32
  -1   0  -1   -0.08    0.20
   1   0   1    0.16    0.25
   1   1  -1   -0.20    0.41
  -1  -1  -1   -0.08    0.28
   1  -1   1   -0.69    0.38
  -1   1  -1    0.02    0.30
   1  -1  -1   -0.75    0.35
  -1  -1   1   -0.22    0.44
   1   1   1   -0.09    0.50
   1  -2   1    4.10    0.60
  -1   2   1    3.56    0.63
  -1  -2  -1    3.27    0.65
   1   2  -1    4.28    0.76
  -1  -2  -1    4.41    1.02
  -1  -2   1    3.21    0.44
   1   2   1    4.63    0.73
   1  -2  -1    4.27    1.10
  -1  -2   1    2.32    0.73
   1  -2  -1    4.46    0.84
  -1   2  -1    3.66    0.34
   1   3  -1  390.85    6.00
  -1   3   1  403.25    6.07
  -1  -3  -1  404.76    6.08
  -1  -3  -1  390.97    6.22
   1   3   1  403.88    6.18
  -1  -3   1  386.39    5.74
   1  -3  -1  396.59    5.80
  -1   3  -1  393.42    4.72
   1   4  -1  150.64    3.13
  -1   4   1  164.67    2.96
  -1  -4  -1  162.88    3.15
  -1   4   1  155.86    2.52
  -1  -4  -1  155.74    2.39
  -1   4  -1  168.28    2.83
  -1  -4   1  159.47    2.49
   1   4   1  157.60    3.25
   1  -4  -1  162.71    3.97
  -1   4  -1  167.68    3.91
  -1  -4   1  154.64    2.66
   1  -4  -1  155.30    2.11
   1   4   1  159.50    3.12
   1   5  -1 1157.70   26.15
  -1   5   1 1129.98   27.20
  -1  -5  -1 1160.03   24.43
  -1   5   1 1199.82   23.55
  -1  -5  -1 1174.72   24.10
  -1   5  -1 1173.78   25.46
  -1  -5   1 1167.40   24.54
   1   5   1 1128.78   25.95
   1  -5  -1 1120.41   24.79
  -1   5  -1 1136.18   25.01
  -1  -5   1 1232.69   25.47
   1  -5  -1 1157.79   22.92
   1   5   1 1182.47   24.25
   1   6  -1  964.03   19.36
  -1   6   1  963.95   22.25
  -1  -6  -1  980.60   19.67
   1   6  -1  962.25   19.54
  -1   6   1  974.57   18.50
  -1  -6  -1  980.89   18.75
   1   6   1  942.74   20.97
   1  -6  -1  964.08   22.14
  -1   6  -1 1009.23   22.98
  -1  -6   1  997.21   19.22
   1  -6  -1  977.06   18.93
   1   6   1  987.48   19.98
  -1  -6   1  993.96   18.40
   1   7  -1  901.44   17.97
  -1   7   1  904.24   18.76
  -1  -7  -1  925.69   18.42
   1   7  -1  938.32   20.30
   1  -7   1  969.43   15.61
  -1   7   1  878.20   16.35
  -1  -7  -1  922.10   17.24
   1   7   1  918.80   18.40
   1  -7  -1  916.14   18.88
  -1   7  -1  936.04   21.20
  -1  -7   1  930.32   17.49
   1  -7  -1  900.84   16.92
   1   7   1  927.21   18.39
  -1  -7   1  939.50   17.65
   1   8  -1  413.62    7.93
  -1   8   1  406.74    8.61
  -1  -8  -1  405.03    7.86
   1   8  -1  402.13    6.88
   1  -8   1  406.18    4.92
  -1   8   1  379.69    5.75
  -1  -8  -1  389.35    6.50
   1   8   1  399.21    8.00
   1  -8  -1  403.43    7.17
  -1   8  -1  411.70    8.63
  -1  -8   1  390.32    6.04
   1  -8  -1  387.25    5.98
   1   8   1  401.85    6.13
  -1  -8   1  396.21    6.10
   1   9  -1    4.69    1.20
  -1   9   1    6.66    2.40
  -1  -9  -1    4.80    1.96
   1   9  -1    2.75    2.12
   1  -9   1    4.43    0.38
  -1   9   1    4.39    0.89
  -1  -9  -1    1.97    1.25
   1   9   1    5.43    2.10
   1  -9  -1    5.45    2.37
  -1   9  -1    3.57    2.45
  -1  -9   1    2.83    0.96
   1  -9  -1    4.43    0.96
  -1  -9   1    3.82    0.92
   1   9   1    3.41    1.31
   1  10  -1    0.24    1.17
  -1  10   1    0.46    2.44
  -1 -10  -1    0.02    1.19
   1  10  -1    0.65    2.13
   1 -10   1    0.53    0.42
  -1 -10  -1    0.47    1.16
  -1  10   1    1.86    0.88
   1  10   1    0.55    2.10
   1 -10  -1    0.58    1.39
  -1  10  -1    2.79    1.53
  -1 -10   1    0.92    0.89
   1 -10  -1    0.76    0.91
  -1 -10   1    0.53    0.86
   1  10   1    0.93    1.24
   1  11  -1    0.66    1.22
  -1  11   1   -2.35    2.43
   1  11  -1    1.61    2.20
  -1 -11  -1    1.94    1.23
  -1 -11  -1    0.84    1.15
  -1  11   1    0.89    0.88
   1  11   1    1.84    2.18
  -1  11  -1    4.32    1.53
   1 -11  -1    2.16    1.42
  -1 -11   1    1.10    0.92
   1 -11  -1   -0.19    0.95
  -1 -11   1   -0.35    0.82
   1  11   1   -0.38    1.23
   1  12  -1   19.10    1.47
  -1  12   1   19.48    2.70
   1  12  -1   19.44    1.58
  -1 -12  -1   16.66    2.37
  -1  12   1   18.97    1.05
   1  12   1   18.68    1.56
  -1  12  -1   19.31    2.72
   1 -12  -1   20.06    1.66
  -1 -12   1   17.95    1.05
  -1 -12   1   19.99    1.01
   1  12   1   17.74    1.36
   1  13  -1   19.62    1.50
  -1  13   1   17.26    2.77
   1  13  -1   21.49    1.61
  -1 -13  -1   20.50    2.37
   1 -13   1   18.34    0.69
  -1 -13  -1   18.65    1.29
  -1  13   1   18.81    1.01
  -1  13  -1   20.08    1.62
   1  13   1   20.05    1.52
  -1  13  -1   20.00    1.77
   1 -13  -1   20.13    2.66
  -1 -13   1   19.01    1.05
  -1 -13   1   18.93    0.95
   1  13   1   18.92    1.36
   1  14  -1   69.24    2.13
  -1  14   1   72.22    2.43
   1  14  -1   74.57    3.21
  -1 -14  -1   70.36    2.19
   1 -14   1   68.97    1.17
  -1 -14  -1   68.87    1.79
  -1  14   1   69.46    1.53
  -1  14  -1   67.77    2.24
   1  14   1   70.49    2.16
  -1  14  -1   73.97    3.58
   1 -14  -1   69.03    3.38
  -1 -14   1   67.66    1.52
  -1 -14   1   68.62    1.44
   1  14   1   69.56    1.88
   1  15  -1    0.89    2.24
  -1  15   1   -1.80    1.64
   1  15  -1   -1.22    2.41
  -1 -15  -1   -0.78    2.30
   1 -15   1   -0.89    0.58
   1 -15   1   -0.37    0.53
  -1 -15  -1    0.06    0.65
  -1  15  -1    1.02    2.39
   1  15   1   -3.25    2.36
  -1  15  -1    0.00    2.67
   1 -15  -1    0.40    1.58
  -1 -15   1   -1.40    1.15
   1 -15  -1   -0.23    0.86
   1  15   1    0.46    0.73
   1  16  -1  321.75    7.28
  -1  16   1  321.15    6.44
   1  16  -1  323.15    6.28
  -1 -16  -1  308.16    6.14
   1 -16   1  307.15    4.03
   1 -16   1  310.53    4.11
  -1 -16  -1  308.35    5.08
  -1  16   1  324.89    5.08
  -1  16  -1  302.71    6.10
   1  16   1  322.93    7.38
  -1  16  -1  333.91    6.66
   1 -16  -1  312.71    7.71
  -1 -16   1  310.54    4.91
   1 -16  -1  316.48    4.83
  -1 -16   1  315.79    4.73
   1  16   1  313.28    4.97
   1  17  -1   38.25    2.00
  -1  17   1   38.21    3.39
   1  17  -1   39.58    3.13
  -1 -17  -1   41.13    3.01
   1 -17   1   38.88    0.73
  -1 -17  -1   41.19    1.53
  -1  17   1   39.36    1.25
  -1  17  -1   37.64    2.13
   1  17   1   39.30    2.01
  -1  17  -1   38.23    3.50
   1 -17  -1   38.93    3.28
  -1 -17   1   37.47    1.23
   1 -17  -1   41.99    1.36
  -1 -17   1   39.76    1.20
   1  17   1   39.07    1.58
   1  18  -1    8.91    1.70
  -1  18   1    9.79    2.04
   1  18  -1   13.39    2.84
  -1 -18  -1    5.16    2.80
   1 -18   1    7.44    0.64
   1 -18   1    8.00    0.56
  -1 -18  -1    8.47    1.14
  -1  18   1    9.04    0.98
  -1  18  -1    7.45    2.93
   1  18   1    9.85    2.75
  -1  18  -1    9.41    2.08
   1 -18  -1    7.09    2.00
  -1 -18   1    8.90    0.99
   1 -18  -1    9.44    0.96
  -1 -18   1   10.40    1.13
   1  18   1    9.39    1.28
   1  19  -1  145.21    4.98
  -1  19   1  146.72    3.89
   1  19  -1  152.91    3.85
  -1 -19  -1  148.87    3.79
   1 -19   1  149.90    1.91
   1 -19   1  143.01    1.77
  -1 -19  -1  144.81    2.79
  -1  19   1  145.81    2.59
  -1  19  -1  145.71    3.83
   1  19   1  155.22    5.04
  -1  19  -1  145.07    5.46
   1 -19  -1  147.96    5.42
  -1 -19   1  145.41    2.60
   1 -19  -1  147.90    2.58
  -1 -19   1  148.85    2.41
   1  19   1  145.36    3.00
  -1  20   1    3.71    3.25
   1  20  -1    3.47    2.90
   1 -20   1    0.05    0.51
   1 -20   1   -0.13    0.47
  -1 -20  -1   -0.24    1.16
  -1  20   1    0.40    0.90
  -1  20  -1    2.16    1.96
   1  20   1    0.89    1.79
  -1  20  -1    0.48    2.08
   1 -20  -1   -0.19    2.02
  -1 -20   1    0.49    0.90
   1 -20  -1    0.47    0.90
  -1 -20   1   -0.20    0.81
   1  21  -1    1.91    1.89
  -1  21   1    3.05    3.41
   1  21  -1   -0.80    1.90
  -1 -21  -1    1.33    1.25
   1 -21   1   -0.25    0.43
  -1  21   1    0.17    0.92
   1  21   1   -1.14    1.85
  -1  21  -1   -0.82    3.30
   1  21   1   -0.01    2.98
  -1  21  -1   -0.47    3.40
   1 -21  -1    1.09    3.42
  -1 -21   1    0.20    0.92
   1  22  -1   52.47    4.05
  -1  22   1   61.23    2.98
   1  22  -1   59.45    4.16
  -1 -22  -1   56.91    1.90
  -1 -22  -1   60.53    1.86
  -1  22   1   56.05    1.58
   1  22   1   57.47    4.03
  -1  22  -1   57.79    2.88
   1  22   1   58.54    2.72
  -1  22  -1   61.33    3.09
  -1 -22   1   54.57    1.51
   1 -22  -1   58.76    1.50
  -1 -22   1   61.32    1.47
   1  23  -1    6.31    3.48
  -1  23   1   11.50    3.86
   1  23  -1   12.89    3.49
  -1 -23  -1    9.70    1.35
   1  23   1    7.29    2.10
  -1  23  -1    6.27    3.75
   1  23   1   10.84    3.43
  -1  23  -1    7.15    3.90
  -1 -23   1    9.47    0.97
   1 -23  -1    9.32    1.05
  -1 -23   1   12.30    1.56
  -1  24   1   13.76    3.88
   1  24  -1   10.72    2.33
  -1  24   1   16.64    2.50
   1  24  -1    9.46    2.28
  -1 -24  -1   11.76    1.40
  -1 -24  -1   12.62    1.59
   1  24   1   10.54    3.50
  -1  24  -1   10.64    4.00
   1  24   1   12.65    3.58
  -1  24  -1   10.85    2.54
   1 -24  -1    8.80    1.35
  -1 -24   1    9.50    0.95
   1 -24  -1    9.14    1.29
  -1 -24   1    9.67    1.35
  -1  25   1   21.95    2.67
   1  25  -1   21.53    3.95
  -1  25   1   21.22    2.75
   1  25  -1   26.58    3.93
  -1 -25  -1   19.14    1.48
  -1 -25  -1   22.15    1.49
   1  25   1   22.76    2.46
  -1  25  -1   20.82    2.69
   1  25   1   23.35    2.49
  -1  25  -1   25.20    4.40
   1 -25  -1   18.78    1.41
   1 -25  -1   19.96    0.98
  -1 -25   1   20.77    1.03
  -1  26   1   60.84    5.13
   1  26  -1   55.88    3.11
  -1  26   1   62.69    5.17
   1  26  -1   64.43    3.14
  -1 -26  -1   54.68    1.99
  -1 -26  -1   59.66    1.91
   1  26   1   58.80    4.68
  -1  26  -1   54.44    5.22
   1  26   1   58.53    4.57
  -1  26  -1   60.89    3.54
  -1 -26   1   56.55    1.57
   1 -26  -1   61.19    1.36
  -1 -26   1   60.90    1.35
  -1  27   1   63.76    3.47
   1  27  -1   59.46    3.28
  -1  27   1   65.14    3.54
   1  27  -1   66.34    4.79
  -1 -27  -1   63.76    2.05
   1  27   1   64.23    3.23
  -1  27  -1   65.41    3.62
   1  27   1   67.32    3.27
  -1  27  -1   64.03    5.30
   1 -27  -1   61.72    1.32
  -1 -27   1   59.96    1.24
  -1  28   1   54.27    5.27
   1  28  -1   54.32    4.97
  -1  28   1   62.71    5.35
   1  28  -1   56.91    3.27
  -1 -28  -1   56.55    2.30
   1  28   1   57.05    5.02
  -1  28  -1   61.75    5.45
   1  28   1   53.47    4.83
  -1  28  -1   56.81    5.33
  -1  29   1    0.38    2.72
   1  29  -1   -1.66    2.58
  -1  29   1    0.21    2.71
   1  29  -1    1.73    3.93
   1  29   1    0.07    2.55
  -1  29  -1    0.88    2.79
   1  29   1    1.12    2.47
  -1  29  -1    2.66    2.70
  -1  30   1    2.33    4.66
   1  30  -1    4.70    4.39
  -1  30   1    5.29    4.57
   1  30  -1    3.49    2.64
   1  30   1    4.81    4.33
  -1  30  -1    4.41    4.66
   1  30   1    2.27    4.23
  -1  30  -1    4.30    4.76
  -1  31   1    3.42    3.11
   1  31  -1    4.39    2.88
  -1  31   1    4.69    4.83
   1  31  -1   -1.22    4.42
   1  31   1    5.12    2.79
  -1  31  -1    0.83    4.84
   1  31   1    5.60    4.39
  -1  31  -1    1.19    3.09
  -1  32   1    5.46    5.08
   1  32  -1   10.16    4.95
  -1  32   1    5.81    3.27
   1  32  -1    8.74    4.66
   1  32   1    4.50    4.87
  -1  32  -1    6.55    3.27
   1  32   1    8.28    2.88
  -1  32  -1    2.86    5.25
   1   0   2 1195.84   24.31
   1   0  -2 1127.06   22.65
   1   0  -2 1180.02   23.44
  -1   0   2 1235.81   24.55
   1   0   2 1147.71   23.40
   1  -1   2   96.51    1.53
   1   1  -2   92.92    2.07
  -1   1   2   95.58    1.67
  -1  -1  -2   93.51    1.51
   1  -1   2   95.76    1.76
  -1  -1   2   97.03    2.16
   1   1   2   95.62    1.89
  -1  -1   2   93.25    1.88
   1  -1  -2   94.19    2.11
   1  -2   2  154.73    2.99
   1   2  -2  143.21    2.81
  -1   2   2  157.67    3.37
  -1  -2  -2  149.92    2.94
   1  -2   2  149.51    2.22
  -1  -2   2  151.82    2.28
   1   2   2  152.26    2.15
  -1  -2   2  146.65    2.56
   1  -2  -2  147.70    2.22
   1  -3   2   32.93    1.29
   1   3  -2   31.32    1.87
  -1   3   2   33.33    2.34
  -1  -3  -2   34.67    1.73
   1   3  -2   30.49    1.37
  -1   3   2   35.12    1.84
   1  -3   2   32.11    0.91
  -1  -3  -2   30.53    1.93
  -1   3  -2   35.75    1.41
  -1  -3   2   32.39    1.90
   1   3   2   34.45    1.78
   1  -3  -2   34.00    1.51
  -1  -3   2   31.64    0.92
   1  -3  -2   30.39    1.13
   1   3   2   36.72    2.08
   1  -4   2  189.66    4.54
   1   4  -2  188.00    4.23
  -1   4   2  188.06    3.59
  -1  -4  -2  183.24    3.93
  -1   4   2  175.74    2.77
  -1  -4  -2  179.83    4.02
   1  -4   2  179.10    2.20
  -1   4  -2  190.79    3.39
  -1  -4   2  184.79    4.17
   1   4   2  181.81    4.06
   1  -4  -2  187.51    3.56
  -1  -4   2  180.50    3.19
   1  -4  -2  177.37    3.67
   1   4   2  184.08    4.06
   1  -5   2  123.83    2.64
   1   5  -2  118.02    3.43
  -1   5   2  121.09    2.83
  -1  -5  -2  123.95    3.30
  -1   5   2  120.24    2.80
  -1  -5  -2  118.04    3.13
  -1  -5   2  120.20    2.45
  -1   5  -2  124.66    2.67
   1   5   2  124.29    3.49
   1  -5  -2  123.53    2.81
  -1  -5   2  120.46    2.40
   1  -5  -2  121.02    2.15
   1   5   2  121.57    3.21
   1  -6   2  601.47   10.81
   1   6  -2  594.43   11.73
  -1   6   2  597.56   11.04
  -1  -6  -2  601.91   11.76
   1   6  -2  622.37   10.32
  -1   6   2  589.60    9.56
  -1  -6  -2  588.65    9.91
  -1  -6   2  594.50   10.43
  -1   6  -2  612.33   12.42
   1   6   2  602.37   11.90
   1  -6  -2  595.25   10.95
  -1   6  -2  608.87    8.08
  -1  -6   2  601.21    9.90
   1  -6  -2  576.01    9.48
   1   6   2  585.07    9.89
   1   7  -2  202.18    4.44
  -1   7   2  202.62    4.96
  -1  -7  -2  200.14    3.45
   1   7  -2  203.10    3.20
  -1   7   2  191.98    3.35
  -1  -7  -2  193.89    3.83
  -1  -7   2  199.74    4.40
  -1   7  -2  202.82    3.72
   1   7   2  203.08    4.49
   1  -7  -2  200.01    3.75
  -1   7  -2  206.55    5.00
  -1  -7   2  199.54    3.04
   1  -7  -2  194.00    3.52
   1   7   2  197.56    3.14
   1   8  -2  303.76    6.09
  -1   8   2  301.49    5.42
  -1  -8  -2  299.54    5.05
  -1   8   2  290.77    4.77
  -1  -8  -2  289.86    4.42
  -1   8  -2  299.98    5.27
   1   8   2  295.55    6.12
   1  -8  -2  307.80    6.68
  -1   8  -2  304.74    5.43
  -1  -8   2  292.32    4.32
   1  -8  -2  294.77    4.91
   1   8   2  288.73    4.50
   1   9  -2    1.74    2.04
  -1   9   2    2.03    1.41
  -1  -9  -2    2.86    1.93
   1   9  -2    2.19    1.26
  -1   9   2    1.33    1.13
  -1  -9  -2    1.58    1.37
  -1   9  -2    0.90    2.26
   1   9   2    2.32    1.22
   1  -9  -2   -0.40    1.43
  -1   9  -2    2.08    1.44
  -1  -9   2    0.46    0.83
   1  -9  -2    2.41    1.20
   1   9   2    1.24    0.87
  -1  -9   2    1.98    0.83
   1  10  -2  876.15   17.93
  -1  10   2  877.74   20.25
  -1 -10  -2  873.81   19.54
   1  10  -2  885.23   18.27
  -1 -10  -2  847.09   16.24
  -1  10   2  867.09   16.78
  -1  10  -2  862.15   19.57
   1  10   2  892.80   19.64
   1 -10  -2  873.04   20.11
  -1  10  -2  892.94   20.52
  -1 -10   2  869.47   16.00
   1 -10  -2  867.64   16.89
   1  10   2  864.26   16.68
  -1 -10   2  882.39   16.33
   1  11  -2  230.38    5.29
  -1  11   2  231.97    5.82
  -1 -11  -2  232.98    4.31
   1  11  -2  248.21    5.65
  -1 -11  -2  223.12    4.21
  -1  11   2  230.87    3.90
  -1  11  -2  230.61    4.43
   1  11   2  236.73    4.38
   1 -11  -2  230.97    5.76
  -1  11  -2  225.53    5.73
  -1 -11   2  224.86    3.35
   1  11   2  229.42    3.61
  -1 -11   2  228.83    3.70
   1  12  -2   13.35    2.28
  -1  12   2   11.37    1.65
  -1 -12  -2   10.81    1.41
   1  12  -2   10.49    2.33
  -1  12  -2   10.18    1.53
   1  12   2   10.24    1.45
   1 -12  -2   13.40    2.59
  -1  12  -2    9.94    2.60
  -1 -12   2   10.83    1.16
  -1 -12   2   11.40    1.10
   1  12   2   11.02    0.92
   1  13  -2  105.47    3.56
  -1  13   2  105.94    2.79
  -1 -13  -2  104.40    2.56
   1  13  -2  108.50    3.68
  -1 -13  -2  102.53    2.40
  -1  13   2  103.00    2.12
  -1  13  -2  102.18    2.65
   1  13   2  107.46    3.52
   1 -13  -2  106.75    3.90
  -1  13  -2  108.20    2.78
  -1 -13   2  104.76    1.80
   1 -13  -2  101.11    1.86
  -1 -13   2  100.93    1.68
   1  13   2  105.15    2.52
   1  14  -2  217.35    4.26
  -1  14   2  224.86    4.63
   1  14  -2  219.48    5.46
  -1 -14  -2  210.07    4.24
  -1 -14  -2  208.20    3.25
  -1  14   2  211.86    3.59
  -1  14  -2  209.89    4.26
   1  14   2  218.53    5.28
  -1  14  -2  221.51    4.63
   1 -14  -2  210.92    5.64
  -1 -14   2  218.59    3.50
   1 -14  -2  212.92    3.69
  -1 -14   2  209.42    3.01
   1  14   2  212.98    4.03
   1  15  -2    2.01    1.44
  -1  15   2    0.40    1.66
   1  15  -2    2.38    2.47
  -1 -15  -2    3.21    2.29
  -1 -15  -2    0.30    1.18
  -1  15   2    2.36    1.04
  -1  15  -2    1.72    1.52
   1  15   2    2.90    2.33
  -1  15  -2    6.05    2.72
   1 -15  -2    4.04    2.53
  -1 -15   2    2.07    0.75
   1 -15  -2    2.34    1.09
  -1 -15   2    1.77    0.65
   1  15   2    2.47    0.84
   1  16  -2   74.78    2.39
  -1  16   2   77.65    2.60
   1  16  -2   77.41    3.52
  -1 -16  -2   74.84    3.45
  -1 -16  -2   73.67    1.97
  -1  16   2   73.80    1.79
  -1  16  -2   76.70    3.68
   1  16   2   77.26    3.36
  -1  16  -2   80.20    3.85
   1 -16  -2   75.06    2.56
  -1 -16   2   73.55    1.45
   1 -16  -2   74.47    1.85
  -1 -16   2   74.64    1.34
   1  16   2   74.55    1.63
   1  17  -2    5.02    2.58
  -1  17   2    6.19    1.80
   1  17  -2    4.94    1.67
  -1 -17  -2    4.91    2.57
  -1  17   2    6.67    1.13
  -1  17  -2    7.19    2.79
   1  17   2    7.93    1.58
  -1  17  -2    3.69    1.87
   1 -17  -2    3.77    1.82
  -1 -17   2    6.00    1.02
   1  17   2    6.39    0.88
   1  18  -2   10.91    2.84
  -1  18   2   11.78    3.24
   1  18  -2    8.60    1.85
  -1 -18  -2    9.26    1.79
  -1 -18  -2    9.95    1.33
  -1  18   2    9.29    1.20
  -1  18  -2    9.56    1.88
   1  18   2    8.18    1.79
  -1  18  -2    8.11    2.01
   1 -18  -2   10.36    3.09
  -1 -18   2    8.79    0.80
   1 -18  -2    8.85    1.16
  -1 -18   2    8.74    0.73
   1  18   2    9.84    1.46
   1  19  -2  191.81    5.99
  -1  19   2  194.42    6.20
   1  19  -2  205.32    6.16
  -1 -19  -2  196.30    5.96
  -1 -19  -2  200.67    3.90
  -1  19   2  198.80    3.64
  -1  19  -2  192.60    4.67
   1  19   2  200.98    6.01
  -1  19  -2  197.58    6.34
   1 -19  -2  192.68    6.25
  -1 -19   2  188.55    2.96
   1 -19  -2  192.79    3.56
  -1 -19   2  199.89    3.20
   1  19   2  195.73    3.98
   1  20  -2   72.70    2.83
  -1  20   2   80.43    4.58
   1  20  -2   78.45    4.12
  -1 -20  -2   71.21    4.16
  -1 -20  -2   72.94    2.17
  -1  20   2   78.18    2.01
  -1  20  -2   70.48    4.37
   1  20   2   74.95    3.95
  -1  20  -2   76.55    3.11
   1 -20  -2   76.73    3.04
  -1 -20   2   74.00    1.51
   1 -20  -2   74.43    1.95
  -1 -20   2   74.32    1.38
   1  20   2   71.46    2.27
   1  21  -2   78.44    3.00
  -1  21   2   86.06    3.29
   1  21  -2   81.78    3.06
  -1 -21  -2   81.04    3.06
  -1 -21  -2   91.37    2.74
  -1  21   2   81.59    2.08
  -1  21  -2   77.41    4.66
   1  21   2   81.01    4.30
  -1  21  -2   83.28    4.95
   1 -21  -2   79.25    3.28
  -1 -21   2   79.36    1.56
   1 -21  -2   87.76    2.33
  -1 -21   2   87.41    1.66
   1  21   2   82.55    2.39
   1  22  -2   84.46    4.56
  -1  22   2   84.30    3.44
   1  22  -2   87.99    4.67
  -1 -22  -2   78.78    4.56
  -1 -22  -2   88.69    2.45
  -1  22   2   84.02    2.13
  -1  22  -2   83.13    3.29
   1  22   2   86.77    3.09
  -1  22  -2   83.53    5.17
   1 -22  -2   85.70    5.00
  -1 -22   2   84.05    1.81
   1 -22  -2   85.58    2.11
  -1 -22   2   88.43    1.80
   1  22   2   79.00    2.42
   1  23  -2   57.29    4.32
  -1  23   2   63.10    4.60
   1  23  -2   65.47    4.50
  -1 -23  -2   56.62    2.41
  -1  23   2   61.43    1.86
  -1  23  -2   62.91    3.11
   1  23   2   62.25    4.24
  -1  23  -2   57.76    3.17
   1 -23  -2   61.40    3.14
  -1 -23   2   60.99    1.24
   1 -23  -2   59.62    1.88
  -1 -23   2   60.68    1.37
   1  23   2   54.95    2.13
   1  24  -2   -1.48    2.23
  -1  24   2    0.74    3.84
   1  24  -2   -1.00    2.14
  -1 -24  -2   -1.11    1.66
  -1  24   2    1.92    1.56
  -1  24  -2    5.11    3.78
   1  24   2    2.49    3.37
  -1  24  -2   -0.60    3.88
   1 -24  -2    1.27    3.81
  -1 -24   2    1.18    0.57
   1 -24  -2    0.91    1.24
  -1 -24   2    0.97    0.91
   1  25  -2   11.26    2.42
  -1  25   2   12.04    2.59
   1  25  -2   16.30    3.75
  -1 -25  -2   10.48    1.61
  -1 -25  -2   12.01    1.59
  -1  25   2   11.21    1.31
   1  25   2   13.79    3.62
  -1  25  -2   12.63    2.61
   1  25   2   13.24    2.28
  -1  25  -2   11.26    2.74
  -1 -25   2   10.38    0.71
   1 -25  -2   11.10    1.21
  -1 -25   2   10.74    0.59
  -1  26   2   15.15    2.58
   1  26  -2   16.98    3.99
  -1  26   2   19.74    4.24
   1  26  -2   11.42    4.07
  -1 -26  -2   12.92    1.70
  -1 -26  -2   17.10    1.59
   1  26   2   15.84    2.46
  -1  26  -2   15.85    2.72
   1  26   2   14.10    3.95
  -1  26  -2   14.21    4.45
   1 -26  -2   13.53    1.38
   1 -26  -2   15.07    1.22
  -1  27   2   30.23    4.54
   1  27  -2   24.39    2.76
  -1  27   2   26.05    4.55
   1  27  -2   23.65    2.77
  -1 -27  -2   22.34    2.30
  -1 -27  -2   24.95    1.81
   1  27   2   23.77    4.27
  -1  27  -2   25.73    4.72
   1  27   2   28.70    4.25
  -1  27  -2   22.58    2.97
   1 -27  -2   20.84    1.49
   1 -27  -2   24.47    1.40
  -1  28   2   57.84    3.53
   1  28  -2   54.46    3.45
  -1  28   2   57.39    3.44
   1  28  -2   53.01    5.03
  -1 -28  -2   54.56    2.29
  -1 -28  -2   63.22    2.26
   1  28   2   53.81    3.29
  -1  28  -2   59.02    3.62
   1  28   2   60.04    3.25
  -1  28  -2   58.68    3.60
  -1  29   2   15.42    4.72
   1  29  -2   14.57    4.46
  -1  29   2   19.67    4.71
   1  29  -2   16.14    2.82
   1  29   2   17.00    4.40
  -1  29  -2   13.95    4.91
   1  29   2   20.16    4.30
  -1  29  -2   19.18    4.75
  -1  30   2    3.71    2.76
   1  30  -2   -2.23    2.74
  -1  30   2    1.26    2.93
   1  30  -2   -2.34    4.28
   1  30   2   -2.85    4.25
  -1  30  -2    1.40    4.64
   1  30   2    1.09    2.64
  -1  30  -2    0.79    2.81
  -1  31   2    7.51    3.10
   1  31  -2    6.39    4.71
  -1  31   2    5.43    3.13
   1  31  -2    7.63    4.60
   1  31   2    9.57    2.90
  -1  31  -2    7.14    3.18
   1  31   2    9.60    4.52
  -1  31  -2   11.23    5.02
   1   0   3   -1.02    1.00
  -1   0  -3    2.97    1.89
  -1   0   3   -0.25    1.15
   1   0  -3    0.31    1.20
   1   0  -3   -0.20    1.74
  -1   0   3    0.25    1.75
  -1   0  -3   -0.06    0.87
   1   0   3    0.41    1.64
   1  -1   3  156.54    2.68
   1   1  -3  159.20    3.89
  -1   1   3  156.79    2.91
   1   1  -3  149.85    2.51
  -1   1   3  157.29    3.66
  -1  -1  -3  151.30    2.54
   1  -1   3  146.96    3.02
  -1  -1   3  155.28    3.83
   1   1   3  158.50    3.54
   1  -1  -3  158.57    2.95
  -1  -1   3  148.58    3.23
   1  -1  -3  149.69    3.62
  -1   1  -3  153.55    2.94
   1   1   3  154.41    2.64
   1  -2   3  307.43    4.91
   1   2  -3  298.55    4.96
  -1  -2  -3  297.74    4.69
  -1   2   3  293.33    5.06
   1   2  -3  292.97    4.48
  -1   2   3  301.00    4.83
  -1  -2  -3  295.07    4.76
   1  -2   3  291.26    4.82
  -1   2  -3  310.92    5.00
  -1  -2   3  303.77    6.08
   1   2   3  297.96    4.73
   1  -2  -3  306.71    5.31
  -1  -2   3  282.60    4.24
   1  -2  -3  291.22    5.82
  -1   2  -3  299.44    4.79
   1   2   3  301.30    4.88
   1  -3   3 2553.57   83.68
   1   3  -3 2563.30   84.31
  -1   3   3 2594.72   86.61
  -1  -3  -3 2657.61   86.59
   1   3  -3 2596.91   81.84
  -1   3   3 2606.53   81.93
  -1  -3  -3 2588.90   83.51
   1  -3   3 2583.34   77.81
  -1   3  -3 2656.16   84.16
  -1  -3   3 2587.21   84.56
   1   3   3 2485.45   82.74
   1  -3  -3 2597.31   83.79
  -1  -3   3 2471.65   75.98
   1  -3  -3 2559.66   80.28
  -1   3  -3 2332.03   70.18
   1   3   3 2590.30   81.50
   1  -4   3  201.60    3.64
   1   4  -3  201.03    4.73
  -1   4   3  201.89    3.84
  -1  -4  -3  203.15    4.47
   1   4  -3  193.35    2.92
  -1   4   3  201.36    3.42
   1  -4   3  201.75    3.02
  -1  -4  -3  198.29    4.42
  -1  -4   3  194.69    4.61
  -1   4  -3  206.14    3.67
   1   4   3  198.26    3.47
   1  -4  -3  205.41    3.89
  -1  -4   3  198.28    3.62
   1  -4  -3  196.57    4.42
   1   4   3  198.44    3.51
   1  -5   3  777.73   14.92
   1   5  -3  787.29   16.48
  -1   5   3  782.72   17.24
  -1  -5  -3  805.95   16.56
   1   5  -3  787.14   14.54
  -1   5   3  762.03   14.06
   1  -5   3  838.10   14.25
  -1  -5  -3  775.45   15.71
  -1  -5   3  791.96   16.35
  -1   5  -3  798.32   16.75
   1   5   3  779.51   16.26
   1  -5  -3  788.81   15.55
  -1  -5   3  799.34   14.58
  -1   5  -3  801.16   13.28
   1  -5  -3  768.57   14.24
   1   5   3  768.86   14.43
   1  -6   3  129.84    3.68
   1   6  -3  121.57    3.44
  -1   6   3  131.07    4.03
  -1  -6  -3  126.77    2.48
   1   6  -3  124.26    1.87
  -1   6   3  123.89    2.86
   1  -6   3  123.56    1.79
  -1  -6  -3  126.18    3.16
  -1  -6   3  125.79    3.46
  -1   6  -3  129.40    2.71
   1   6   3  127.37    3.49
   1  -6  -3  128.11    2.75
  -1  -6   3  123.06    1.80
   1  -6  -3  123.75    2.21
   1   6   3  126.15    2.38
   1  -7   3  721.05   15.04
   1   7  -3  687.11   14.26
  -1   7   3  726.87   15.64
  -1  -7  -3  699.63   14.39
   1   7  -3  715.27   12.52
  -1   7   3  678.75   12.86
  -1  -7  -3  698.99   13.52
  -1  -7   3  686.91   12.79
  -1   7  -3  720.75   15.17
   1   7   3  733.83   14.99
   1  -7  -3  683.41   14.98
  -1   7  -3  750.29   11.53
  -1  -7   3  700.24   12.10
   1  -7  -3  690.73   13.26
   1   7   3  698.80   13.69
   1  -8   3   -0.45    1.30
   1   8  -3   -0.21    1.20
  -1   8   3   -0.13    2.39
  -1  -8  -3    0.07    1.15
   1   8  -3    0.52    0.89
  -1   8   3    0.42    1.37
  -1  -8  -3    0.63    0.94
  -1  -8   3   -1.29    1.19
  -1   8  -3   -0.86    2.21
   1   8   3   -1.52    1.20
   1  -8  -3   -0.57    2.26
  -1   8  -3   -0.18    0.45
  -1  -8   3   -0.36    0.86
   1  -8  -3    0.22    0.88
   1   8   3   -0.24    1.65
   1   9  -3   -0.83    1.24
  -1   9   3    1.26    2.44
  -1  -9  -3    0.69    1.18
   1   9  -3    0.52    0.87
  -1  -9  -3    2.17    0.93
  -1   9   3    0.10    0.83
  -1  -9   3    1.92    1.20
  -1   9  -3    1.66    2.26
   1   9   3    1.83    1.25
   1  -9  -3   -0.61    2.32
  -1  -9   3    0.33    0.80
   1  -9  -3   -0.35    0.89
   1   9   3    0.75    1.61
   1  10  -3  142.60    3.01
  -1  10   3  144.52    4.44
  -1 -10  -3  142.77    2.96
   1  10  -3  137.11    2.27
  -1 -10  -3  134.97    3.10
  -1  10   3  139.09    2.93
  -1 -10   3  146.94    2.92
  -1  10  -3  140.43    3.09
   1  10   3  144.16    2.99
   1 -10  -3  142.71    3.20
  -1  10  -3  141.52    3.13
  -1 -10   3  141.00    2.19
   1 -10  -3  140.58    3.09
   1  10   3  143.36    3.29
   1  11  -3    1.65    2.18
  -1  11   3    3.50    1.54
  -1 -11  -3   -0.22    2.12
   1  11  -3    3.25    1.36
  -1 -11  -3   -0.33    1.34
  -1  11  -3    1.49    2.39
   1  11   3    2.03    1.32
   1 -11  -3    1.51    2.50
  -1  11  -3    3.04    1.49
  -1 -11   3    2.21    1.06
   1  11   3    1.53    1.61
  -1 -11   3    2.27    0.78
   1  12  -3  460.41    8.63
  -1  12   3  488.47   10.60
  -1 -12  -3  477.69   10.05
   1  12  -3  470.80   10.13
  -1 -12  -3  456.06    8.60
  -1  12   3  449.51    7.55
  -1  12  -3  466.42   10.23
   1  12   3  477.58    9.97
   1 -12  -3  462.30   10.54
  -1  12  -3  471.63   10.47
  -1 -12   3  479.74    7.29
   1 -12  -3  457.58    7.68
   1  12   3  478.64    8.87
  -1 -12   3  482.14    7.72
   1  13  -3  173.57    4.65
  -1  13   3  182.78    3.88
  -1 -13  -3  177.89    3.67
   1  13  -3  182.95    4.83
  -1 -13  -3  175.38    3.63
  -1  13   3  177.35    3.45
  -1  13  -3  173.66    3.73
   1  13   3  180.31    4.63
   1 -13  -3  177.52    5.09
  -1  13  -3  176.69    5.03
  -1 -13   3  183.04    2.90
   1 -13  -3  181.35    3.85
   1  13   3  176.89    3.66
  -1 -13   3  174.22    2.57
   1  14  -3   60.51    2.06
  -1  14   3   61.63    2.29
  -1 -14  -3   63.29    2.10
   1  14  -3   61.65    2.14
  -1 -14  -3   60.08    1.98
  -1  14   3   62.12    1.91
  -1  14  -3   60.54    2.19
   1  14   3   59.15    2.03
   1 -14  -3   60.59    2.29
  -1  14  -3   60.91    3.39
  -1 -14   3   61.80    1.46
   1 -14  -3   58.78    1.93
   1  14   3   63.39    2.18
  -1 -14   3   57.58    1.16
   1  15  -3   56.82    2.11
  -1  15   3   58.63    2.30
  -1 -15  -3   60.93    2.17
   1  15  -3   59.16    2.14
  -1 -15  -3   58.27    1.97
  -1  15   3   61.23    1.89
  -1  15  -3   58.96    2.26
   1  15   3   60.14    2.12
   1 -15  -3   58.85    2.31
  -1  15  -3   59.38    2.32
  -1 -15   3   62.03    1.43
   1 -15  -3   59.43    1.90
  -1 -15   3   56.45    1.10
   1  15   3   57.86    2.13
   1  16  -3  256.88    5.17
  -1  16   3  261.55    6.87
  -1 -16  -3  258.05    5.29
   1  16  -3  265.65    5.29
  -1 -16  -3  249.94    4.67
  -1  16   3  263.46    4.69
  -1  16  -3  256.62    5.40
   1  16   3  267.95    6.37
   1 -16  -3  262.56    5.57
  -1  16  -3  262.81    5.49
  -1 -16   3  268.73    4.03
   1 -16  -3  257.23    4.68
  -1 -16   3  260.14    3.82
   1  16   3  261.08    5.05
   1  17  -3   95.99    2.84
  -1  17   3  103.89    4.22
   1  17  -3   97.33    2.81
  -1 -17  -3   96.54    2.82
  -1 -17  -3   95.20    1.96
  -1  17   3   97.21    2.38
  -1  17  -3   96.17    2.96
   1  17   3   99.10    3.85
  -1  17  -3   99.72    3.13
   1 -17  -3  100.08    4.31
  -1 -17   3   98.37    1.60
   1 -17  -3   94.34    2.50
  -1 -17   3   94.33    1.68
   1  17   3   96.42    2.63
   1  18  -3    3.09    1.72
  -1  18   3   -0.49    3.07
   1  18  -3    3.49    2.83
  -1 -18  -3    5.33    2.70
  -1 -18  -3    1.10    1.43
  -1  18   3    1.53    1.30
  -1  18  -3    0.60    1.88
   1  18   3   -0.59    2.67
  -1  18  -3    1.94    3.21
   1 -18  -3    7.51    3.01
  -1 -18   3    2.06    0.84
   1 -18  -3    2.22    1.34
  -1 -18   3    1.78    0.56
   1  18   3    2.88    0.97
   1  19  -3   20.54    2.05
  -1  19   3   19.34    2.14
   1  19  -3   22.56    3.19
  -1 -19  -3   20.95    3.23
  -1 -19  -3   23.54    1.86
  -1  19   3   21.07    1.54
  -1  19  -3   20.04    2.15
   1  19   3   19.84    2.01
  -1  19  -3   20.58    3.65
   1 -19  -3   22.86    3.52
  -1 -19   3   19.57    1.00
   1 -19  -3   26.18    1.73
  -1 -19   3   22.30    0.76
   1  19   3   20.26    1.20
   1  20  -3   13.88    2.06
  -1  20   3   16.31    2.31
   1  20  -3   17.33    3.29
  -1 -20  -3   17.26    3.30
  -1 -20  -3   10.73    1.79
  -1  20   3   16.01    1.53
  -1  20  -3   18.70    3.57
   1  20   3   18.19    1.99
  -1  20  -3   14.99    2.34
   1 -20  -3   16.78    2.32
  -1 -20   3   13.54    0.89
   1 -20  -3   12.36    1.55
   1  20   3   12.91    1.82
   1  21  -3   17.55    2.19
  -1  21   3   17.81    2.42
   1  21  -3   16.97    2.21
  -1 -21  -3   19.51    2.18
  -1 -21  -3   15.31    2.04
  -1  21   3   18.37    1.55
  -1  21  -3   17.85    3.74
   1  21   3   18.35    2.11
  -1  21  -3   20.11    2.43
   1 -21  -3   19.28    2.38
  -1 -21   3   16.11    0.67
   1 -21  -3   13.30    1.71
   1  21   3   17.63    1.82
   1  22  -3   14.71    3.60
  -1  22   3   15.91    2.40
   1  22  -3   18.05    2.36
  -1 -22  -3   16.51    3.53
  -1 -22  -3   13.89    1.96
  -1  22   3   16.99    1.51
  -1  22  -3   14.62    2.50
   1  22   3   18.84    3.41
  -1  22  -3   14.67    4.11
   1 -22  -3   19.55    3.88
  -1 -22   3   18.59    0.79
   1 -22  -3   14.13    1.70
  -1 -22   3   15.62    0.84
   1  22   3   17.60    1.82
   1  23  -3   17.59    3.69
  -1  23   3   20.20    3.87
   1  23  -3   18.49    3.74
  -1 -23  -3   15.01    3.64
  -1  23   3   19.96    1.60
  -1  23  -3   16.63    2.49
   1  23   3   21.05    3.55
  -1  23  -3   16.47    2.61
   1 -23  -3   22.35    4.04
  -1 -23   3   17.00    0.65
   1 -23  -3   17.26    1.57
   1  23   3   19.63    1.86
   1  24  -3    2.88    3.60
  -1  24   3    4.80    3.76
   1  24  -3    1.41    3.57
  -1 -24  -3    5.32    2.21
  -1 -24  -3    4.43    1.90
  -1  24   3    5.03    1.42
  -1  24  -3   -0.67    3.98
   1  24   3    1.23    3.30
  -1  24  -3    2.44    2.55
   1 -24  -3    4.87    2.41
   1 -24  -3    7.18    1.46
   1  24   3    3.44    1.63
   1  25  -3    1.64    2.33
  -1  25   3    1.67    2.46
   1  25  -3    2.39    2.27
  -1 -25  -3    3.14    2.27
  -1 -25  -3    0.11    1.63
  -1  25   3    1.86    1.46
  -1  25  -3    3.58    3.90
   1  25   3   -0.21    2.17
  -1  25  -3    4.84    4.15
   1 -25  -3    1.05    3.92
   1 -25  -3    1.68    1.31
   1  25   3    1.27    1.63
   1  26  -3   53.18    3.22
  -1  26   3   61.65    3.37
   1  26  -3   58.13    4.79
  -1 -26  -3   58.44    2.36
  -1  26   3   58.30    2.20
  -1  26  -3   54.22    3.43
   1  26   3   55.50    3.02
  -1  26  -3   55.05    3.38
   1 -26  -3   55.76    5.15
   1 -26  -3   57.86    1.96
   1  27  -3   16.69    4.34
  -1  27   3   12.02    4.39
   1  27  -3   16.75    4.07
  -1 -27  -3   14.44    1.90
  -1 -27  -3   19.81    2.04
  -1  27   3   15.41    1.64
   1  27   3   16.05    2.64
  -1  27  -3   14.05    2.88
   1  27   3   14.74    4.07
  -1  27  -3   15.84    4.60
   1 -27  -3   15.64    2.88
   1 -27  -3   17.01    1.62
   1  28  -3   12.87    4.44
  -1  28   3   10.68    4.45
   1  28  -3   11.49    2.65
  -1 -28  -3    8.62    1.84
  -1 -28  -3   10.60    1.75
   1  28   3    9.84    4.17
  -1  28  -3   15.60    4.65
   1  28   3    7.79    2.55
  -1  28  -3   13.88    4.61
   1 -28  -3    9.41    1.49
  -1  29   3   -1.55    4.51
   1  29  -3    1.47    2.68
  -1  29   3    1.67    2.70
   1  29  -3    1.73    4.19
  -1 -29  -3    1.81    1.75
  -1 -29  -3    3.07    1.68
   1  29   3    4.60    4.07
  -1  29  -3    2.38    2.86
   1  29   3    0.73    2.55
  -1  29  -3    3.22    2.83
  -1  30   3    6.94    2.83
   1  30  -3    4.15    4.51
  -1  30   3    2.80    4.85
   1  30  -3    0.40    4.44
   1  30   3    7.99    2.66
  -1  30  -3    6.30    3.00
   1  30   3    5.18    4.40
  -1  30  -3    4.16    4.96
  -1  31   3    0.20    4.80
   1  31  -3    5.77    4.71
  -1  31   3    1.79    4.92
   1  31  -3    1.29    2.82
   1  31   3    2.87    4.44
  -1  31  -3    0.60    5.05
   1  31   3    2.37    2.76
  -1  31  -3    6.14    3.05
   1   0   4  109.90    3.48
  -1   0  -4  111.25    2.40
  -1   0   4  108.76    2.59
   1   0  -4  111.99    2.59
   1   0  -4  107.81    2.33
  -1   0   4  109.80    3.47
  -1   0  -4  106.57    2.16
   1   0   4  109.86    3.31
   1  -1   4 1250.36   27.80
   1   1  -4 1169.47   29.10
  -1   1   4 1233.28   30.32
  -1  -1  -4 1244.97   27.93
   1   1  -4 1262.89   29.12
  -1   1   4 1264.78   28.21
  -1  -1  -4 1237.68   27.09
   1  -1   4 1304.47   29.70
  -1   1  -4 1255.30   30.06
  -1  -1   4 1221.36   29.78
   1   1   4 1270.18   30.22
   1  -1  -4 1225.32   30.35
   1  -1  -4 1241.75   27.43
  -1  -1   4 1298.49   30.23
  -1   1  -4 1277.26   28.73
   1   1   4 1263.01   27.85
   1  -2   4 2879.46   99.12
   1   2  -4 2771.65   97.18
  -1   2   4 2807.66   98.51
  -1  -2  -4 2790.39   94.41
   1   2  -4 2765.76   91.03
  -1   2   4 2720.51   94.42
  -1  -2  -4 2785.36   92.48
   1  -2   4 2807.46   91.88
  -1   2  -4 2809.01   94.83
  -1  -2   4 2814.19   94.31
   1   2   4 2806.18   94.50
   1  -2  -4 2768.40   97.94
  -1  -2   4 2820.45   93.27
   1  -2  -4 2780.09   92.72
  -1   2  -4 2792.73   90.93
   1   2   4 2797.72   93.53
   1  -3   4  474.16    7.99
   1   3  -4  462.73    9.38
  -1   3   4  459.56    8.15
  -1  -3  -4  461.46    7.83
   1   3  -4  447.27    8.08
  -1   3   4  453.65    7.71
  -1  -3  -4  450.25    8.71
   1  -3   4  456.40    7.71
  -1  -3   4  456.50    7.86
  -1   3  -4  471.80    9.33
   1   3   4  449.71    9.01
   1  -3  -4  467.63    9.85
  -1  -3   4  470.16    8.43
   1  -3  -4  456.90    8.96
  -1   3  -4  455.92    6.88
   1   3   4  450.83    7.67
   1  -4   4    4.63    2.11
   1   4  -4    1.33    2.15
  -1   4   4    0.12    1.40
  -1  -4  -4   -0.93    1.93
   1   4  -4    1.00    1.40
  -1   4   4    1.92    1.92
   1  -4   4    0.87    1.06
  -1  -4  -4    1.60    1.91
  -1  -4   4    1.03    1.24
  -1   4  -4    1.72    2.14
   1   4   4    0.56    1.96
   1  -4  -4    0.60    2.31
  -1  -4   4    1.35    1.39
   1  -4  -4    2.15    1.99
  -1   4  -4    1.28    1.05
   1   4   4    0.77    1.21
   1  -5   4   -1.36    2.15
   1   5  -4   -0.43    2.07
  -1   5   4    2.17    1.39
  -1  -5  -4    0.21    1.93
   1   5  -4   -0.24    1.24
  -1   5   4    0.72    1.07
   1  -5   4    0.38    0.90
  -1  -5  -4    0.82    1.08
  -1  -5   4    0.43    1.20
  -1   5  -4   -0.90    1.27
   1   5   4    0.94    1.97
  -1  -5   4    0.67    1.25
  -1   5  -4    0.35    0.88
   1  -5  -4    0.18    1.09
   1   5   4    0.03    1.94
   1  -6   4   72.70    2.01
   1   6  -4   72.35    1.99
  -1   6   4   72.87    2.15
  -1  -6  -4   75.78    2.86
   1   6  -4   71.50    1.86
  -1   6   4   69.06    2.52
   1  -6   4   70.60    1.37
  -1  -6  -4   68.76    1.79
  -1  -6   4   72.02    1.90
  -1   6  -4   73.34    2.06
   1   6   4   72.32    2.82
   1  -6  -4   73.71    3.29
  -1  -6   4   71.53    1.85
  -1   6  -4   74.51    1.41
   1  -6  -4   70.17    2.63
   1   6   4   69.96    2.72
   1  -7   4   62.66    1.98
   1   7  -4   65.03    2.86
  -1   7   4   65.50    2.11
  -1  -7  -4   66.51    2.70
   1   7  -4   62.51    1.69
  -1   7   4   62.47    1.59
   1  -7   4   60.89    1.38
  -1  -7  -4   64.45    1.68
  -1  -7   4   65.48    2.76
  -1   7  -4   65.18    2.99
   1   7   4   63.99    2.77
   1  -7  -4   64.52    2.12
  -1   7  -4   61.25    1.13
  -1  -7   4   63.27    1.63
   1  -7  -4   61.46    1.65
   1   7   4   64.03    2.60
   1  -8   4  218.00    4.03
   1   8  -4  210.60    3.91
  -1   8   4  222.83    5.43
  -1  -8  -4  216.07    3.94
   1   8  -4  211.48    3.44
   1  -8   4  211.71    2.69
  -1   8   4  208.79    4.21
  -1  -8  -4  209.80    3.55
  -1  -8   4  208.33    3.80
  -1   8  -4  215.73    5.16
   1   8   4  217.13    4.91
   1  -8  -4  212.55    4.17
  -1   8  -4  214.88    2.97
  -1  -8   4  215.58    3.35
   1  -8  -4  210.09    4.37
   1   8   4  220.74    4.62
   1  -9   4  175.43    4.50
   1   9  -4  171.82    4.48
  -1   9   4  180.43    5.02
  -1  -9  -4  174.19    4.42
   1   9  -4  177.28    2.90
   1  -9   4  172.28    2.23
  -1  -9  -4  170.15    3.86
  -1   9   4  172.68    2.96
  -1  -9   4  174.05    3.34
  -1   9  -4  177.50    4.63
   1   9   4  174.67    3.40
   1  -9  -4  170.03    3.58
  -1   9  -4  174.39    2.32
  -1  -9   4  172.33    2.73
   1  -9  -4  169.19    3.84
   1   9   4  170.05    3.92
   1 -10   4   33.57    1.73
   1  10  -4   35.12    2.62
  -1  10   4   35.50    2.97
  -1 -10  -4   33.93    2.54
   1  10  -4   32.76    1.19
  -1  10   4   27.05    2.13
  -1 -10   4   31.05    1.61
  -1  10  -4   32.42    2.78
   1  10   4   33.79    1.71
   1 -10  -4   33.24    1.84
  -1  10  -4   32.53    0.73
  -1 -10   4   31.00    1.25
   1  10   4   31.11    2.19
   1  11  -4   48.02    2.81
  -1  11   4   50.17    3.14
  -1 -11  -4   51.58    1.87
   1  11  -4   47.92    1.26
  -1 -11  -4   52.20    1.89
   1 -11   4   48.17    0.67
  -1  11   4   54.73    1.91
  -1 -11   4   49.82    2.76
  -1  11  -4   50.00    2.01
   1  11   4   53.13    1.89
   1 -11  -4   49.57    3.17
  -1 -11   4   46.22    1.35
   1  11   4   49.24    2.42
   1  12  -4    3.65    1.43
  -1  12   4    3.57    1.56
  -1 -12  -4    7.20    2.21
   1  12  -4    4.36    0.77
  -1 -12  -4    1.55    1.66
  -1  12   4    0.88    1.52
  -1 -12   4    4.61    1.34
  -1  12  -4    4.42    2.45
   1  12   4    3.83    2.21
   1 -12  -4    0.98    1.56
  -1  12  -4    3.53    2.48
  -1 -12   4    4.05    0.77
   1 -12  -4    1.12    1.77
   1  12   4    4.37    1.66
   1  13  -4   69.73    3.25
  -1  13   4   73.12    3.50
  -1 -13  -4   69.59    2.22
   1  13  -4   72.78    2.23
  -1 -13  -4   64.64    2.30
  -1  13   4   69.39    1.66
  -1  13  -4   69.74    2.30
   1  13   4   70.16    3.15
   1 -13  -4   72.31    2.38
  -1  13  -4   71.40    2.40
  -1 -13   4   71.28    1.55
   1 -13  -4   67.49    2.33
   1  13   4   70.73    2.45
  -1 -13   4   70.06    1.34
   1  14  -4   21.18    1.70
  -1  14   4   22.42    1.84
  -1 -14  -4   26.20    1.70
   1  14  -4   21.89    2.71
  -1 -14  -4   20.98    1.73
  -1  14   4   22.58    1.71
  -1  14  -4   23.57    1.77
   1  14   4   26.16    2.57
   1 -14  -4   23.38    2.88
  -1  14  -4   21.68    1.87
  -1 -14   4   22.78    1.04
   1 -14  -4   22.49    1.74
   1  14   4   22.30    1.85
  -1 -14   4   22.68    1.03
   1  15  -4    5.55    2.60
  -1  15   4    9.32    2.77
  -1 -15  -4    9.69    2.49
   1  15  -4    9.15    2.52
  -1 -15  -4    8.36    1.00
  -1  15   4    8.89    1.52
  -1  15  -4    9.77    2.71
   1  15   4    7.63    1.57
   1 -15  -4    6.66    2.88
  -1  15  -4    9.37    1.73
  -1 -15   4    9.14    0.87
   1 -15  -4    7.75    0.98
   1  15   4   10.50    1.70
  -1 -15   4    8.26    0.66
   1  16  -4   36.83    3.04
  -1  16   4   39.00    3.30
  -1 -16  -4   35.24    3.05
   1  16  -4   34.48    3.07
  -1 -16  -4   34.83    2.06
  -1  16   4   34.81    1.26
  -1  16  -4   34.17    3.25
   1  16   4   40.39    2.92
   1 -16  -4   38.85    3.37
  -1  16  -4   35.76    2.17
  -1 -16   4   36.00    1.12
   1 -16  -4   38.00    2.03
   1  16   4   35.96    2.06
  -1 -16   4   35.65    0.88
   1  17  -4    8.91    1.78
  -1  17   4   10.33    2.98
  -1 -17  -4    5.47    2.81
   1  17  -4    7.47    2.78
  -1 -17  -4    7.49    1.08
  -1  17   4    7.90    1.53
  -1  17  -4    8.96    3.01
   1  17   4    8.00    2.67
   1 -17  -4   10.01    3.08
  -1  17  -4    8.68    1.96
  -1 -17   4    7.83    0.62
   1 -17  -4    7.39    0.99
  -1 -17   4    7.57    0.74
   1  17   4    8.29    1.77
   1  18  -4    0.42    1.79
  -1  18   4    5.58    1.98
  -1 -18  -4    2.36    2.85
   1  18  -4    1.46    2.80
  -1 -18  -4   -1.40    1.73
  -1  18   4    1.36    1.52
  -1  18  -4   -0.46    3.10
   1  18   4    5.92    2.77
   1 -18  -4    6.95    3.22
  -1  18  -4    0.24    3.16
   1  18   4   -0.08    1.74
   1  19  -4   40.15    2.39
  -1  19   4   38.81    2.46
  -1 -19  -4   38.18    3.51
   1  19  -4   39.91    3.59
  -1 -19  -4   37.49    2.28
  -1  19   4   40.97    1.95
  -1  19  -4   37.34    3.88
   1  19   4   43.40    3.51
   1 -19  -4   35.95    3.90
  -1  19  -4   42.11    3.99
  -1 -19   4   38.08    0.84
   1 -19  -4   37.43    1.43
  -1 -19   4   38.46    0.82
   1  19   4   42.65    2.24
   1  20  -4   87.57    3.20
  -1  20   4   93.46    3.29
   1  20  -4   94.53    4.46
  -1 -20  -4   91.35    4.58
  -1 -20  -4   85.75    3.23
  -1  20   4   94.55    2.68
  -1  20  -4   84.98    4.86
   1  20   4   96.11    4.31
  -1  20  -4   91.29    5.05
   1 -20  -4   89.11    4.88
  -1 -20   4   90.97    1.51
   1 -20  -4   93.82    3.03
  -1 -20   4   89.82    1.36
   1  20   4   93.89    3.01
   1  21  -4    3.07    2.10
  -1  21   4    4.21    2.24
   1  21  -4    3.39    3.33
  -1 -21  -4    3.92    1.97
  -1 -21  -4    1.80    1.20
  -1  21   4    3.90    1.02
  -1  21  -4    5.63    3.59
   1  21   4    6.95    3.15
  -1  21  -4    2.38    2.34
   1 -21  -4    3.26    2.23
  -1 -21   4    3.18    0.53
   1 -21  -4    2.30    1.65
  -1 -21   4    3.05    0.49
   1  21   4    4.39    1.83
   1  22  -4  118.81    3.81
  -1  22   4  124.79    5.62
   1  22  -4  120.35    3.88
  -1 -22  -4  120.23    3.78
  -1 -22  -4  132.24    4.06
  -1  22   4  117.41    3.10
  -1  22  -4  113.68    5.76
   1  22   4  125.51    5.08
  -1  22  -4  119.30    4.06
   1 -22  -4  117.00    4.00
   1 -22  -4  126.52    2.74
   1  22   4  124.89    3.50
   1  23  -4   18.75    3.91
  -1  23   4   19.29    3.98
   1  23  -4   18.36    2.39
  -1 -23  -4   15.87    3.78
  -1 -23  -4   23.64    2.33
  -1  23   4   20.67    1.83
  -1  23  -4   19.82    2.65
   1  23   4   27.52    3.65
  -1  23  -4   20.30    4.23
   1 -23  -4   23.13    4.05
   1 -23  -4   22.59    2.02
   1  23   4   20.71    1.35
   1  24  -4    4.40    3.62
  -1  24   4    1.53    3.80
   1  24  -4    2.05    3.55
  -1 -24  -4    1.81    3.56
  -1 -24  -4    2.50    1.92
  -1  24   4    1.70    1.59
  -1  24  -4   -0.10    2.48
   1  24   4    0.14    3.47
  -1  24  -4   -0.15    4.02
   1 -24  -4    1.57    3.89
   1 -24  -4    0.44    1.59
   1  24   4    0.20    1.80
   1  25  -4    5.73    3.78
  -1  25   4    4.53    3.97
   1  25  -4    3.12    3.75
  -1 -25  -4    5.16    3.75
  -1 -25  -4    6.06    1.84
  -1  25   4    4.60    1.63
  -1  25  -4    9.64    4.15
   1  25   4    3.03    2.20
  -1  25  -4    2.90    2.71
   1 -25  -4    5.94    4.00
   1 -25  -4    3.86    1.56
   1  25   4    5.33    1.83
   1  26  -4    4.39    2.51
  -1  26   4    2.42    2.49
   1  26  -4    6.42    2.46
  -1 -26  -4    3.50    2.40
  -1 -26  -4    5.28    1.93
  -1  26   4    4.46    1.71
  -1  26  -4    4.26    4.32
   1  26   4    3.84    2.35
  -1  26  -4    7.58    4.25
   1 -26  -4    2.81    2.69
   1  26   4    4.61    1.88
   1  27  -4   36.11    3.11
  -1  27   4   42.24    3.09
   1  27  -4   35.38    2.95
  -1 -27  -4   35.96    4.63
  -1 -27  -4   36.49    2.49
  -1  27   4   36.32    2.16
  -1  27  -4   33.56    5.08
   1  27   4   37.98    4.40
  -1  27  -4   33.58    5.18
   1 -27  -4   33.68    4.95
   1 -27  -4   37.75    2.10
   1  27   4   39.10    2.47
   1  28  -4   62.97    5.51
  -1  28   4   67.09    5.67
   1  28  -4   67.01    5.18
  -1 -28  -4   71.63    2.75
  -1  28   4   66.66    2.66
  -1  28  -4   69.12    3.96
   1  28   4   66.56    5.07
  -1  28  -4   69.34    3.84
   1 -28  -4   68.17    5.71
   1 -28  -4   75.14    2.57
   1  29  -4    2.45    4.41
  -1  29   4   -1.83    4.47
   1  29  -4   -0.66    4.16
  -1 -29  -4    0.80    2.06
  -1 -29  -4   -1.19    2.01
   1  29   4    1.01    2.57
  -1  29  -4   -1.22    4.62
   1  29   4   -0.42    2.53
  -1  29  -4   -5.35    4.58
   1 -29  -4    1.20    2.79
   1  30  -4   -1.12    2.91
  -1  30   4    5.13    2.93
   1  30  -4    1.97    2.78
   1  30   4   10.69    4.24
  -1  30  -4    4.04    4.92
   1  30   4    7.33    2.72
  -1  30  -4    4.32    4.85
  -1  31   4   -2.53    4.86
   1  31  -4   -0.07    2.92
  -1  31   4    0.82    4.94
   1  31  -4    1.02    4.53
   1  31   4   -0.76    4.38
  -1  31  -4    0.64    3.21
   1  31   4    2.91    4.31
  -1  31  -4    2.66    3.14
   1   0   5   -0.33    2.04
  -1   0   5    1.09    1.35
  -1   0  -5    0.76    1.22
   1   0  -5   -1.39    1.34
   1   0  -5    1.26    1.11
  -1   0   5   -2.13    1.96
  -1   0  -5   -0.23    1.03
   1   0   5   -1.91    1.82
   1  -1   5   17.65    1.40
   1   1  -5   18.09    2.50
  -1   1   5   16.20    2.53
  -1  -1  -5   18.07    1.38
   1   1  -5   15.17    1.99
  -1   1   5   16.69    2.26
  -1  -1  -5   18.45    1.22
   1  -1   5   16.36    1.17
  -1  -1   5   17.92    1.49
  -1   1  -5   18.48    2.27
   1   1   5   18.32    2.23
   1  -1  -5   18.68    2.55
   1  -1  -5   17.19    1.35
  -1  -1   5   18.66    1.30
  -1   1  -5   17.46    1.13
   1   1   5   18.07    1.31
   1  -2   5  507.85    8.75
   1   2  -5  501.74    8.93
  -1   2   5  497.74    8.92
  -1  -2  -5  502.57    8.77
   1   2  -5  494.00    9.15
  -1   2   5  498.92    8.66
  -1  -2  -5  495.53    9.49
   1  -2   5  494.67    8.94
  -1  -2   5  506.48   10.19
  -1   2  -5  507.14    8.92
   1   2   5  502.19    8.75
   1  -2  -5  493.57    8.93
   1  -2  -5  486.84    9.55
  -1  -2   5  495.13    8.28
  -1   2  -5  500.60    8.96
   1   2   5  490.13    8.42
   1  -3   5    7.83    1.32
   1   3  -5    7.59    1.39
  -1   3   5    8.32    1.45
  -1  -3  -5    8.13    1.29
   1   3  -5    8.83    1.65
  -1   3   5    7.43    1.30
  -1  -3  -5    6.51    1.25
   1  -3   5    8.00    1.51
  -1  -3   5    7.85    1.32
  -1   3  -5    7.18    1.32
   1   3   5    9.42    2.06
   1  -3  -5    7.57    2.46
  -1  -3   5    7.92    1.07
   1  -3  -5    7.31    2.10
  -1   3  -5    9.79    1.49
   1   3   5    8.26    1.28
   1  -4   5  139.85    2.79
   1   4  -5  139.50    2.87
  -1   4   5  139.30    2.94
  -1  -4  -5  136.40    2.78
   1   4  -5  136.77    2.99
  -1   4   5  136.35    3.67
  -1  -4  -5  138.25    3.61
   1  -4   5  138.22    2.76
  -1  -4   5  139.75    2.80
  -1   4  -5  140.46    2.87
   1   4   5  139.14    2.74
   1  -4  -5  140.20    2.98
  -1  -4   5  141.18    3.09
   1  -4  -5  137.18    2.73
  -1   4  -5  140.69    2.75
   1   4   5  135.45    3.72
   1  -5   5   14.62    2.25
   1   5  -5   15.37    2.34
  -1   5   5   14.15    2.45
  -1  -5  -5   12.83    2.15
   1   5  -5   12.73    0.92
  -1   5   5   13.33    2.07
  -1  -5  -5   12.88    1.24
   1  -5   5   13.29    0.78
  -1  -5   5   11.85    1.39
  -1   5  -5   12.71    1.41
   1   5   5   13.24    1.30
   1  -5  -5   12.06    1.54
  -1  -5   5   11.75    1.52
  -1   5  -5   11.21    1.18
   1  -5  -5   12.71    1.31
   1   5   5   10.46    2.20
   1  -6   5   12.93    1.45
   1   6  -5   14.08    2.31
  -1   6   5   16.55    2.52
  -1  -6  -5   12.72    2.23
   1   6  -5   13.72    1.41
  -1   6   5   14.75    1.26
  -1  -6  -5   13.77    1.25
   1  -6   5   13.64    1.09
  -1  -6   5   14.77    2.27
  -1   6  -5   13.99    1.47
   1   6   5   12.63    2.17
   1  -6  -5   16.04    2.61
  -1   6  -5   13.19    1.06
  -1  -6   5   15.34    1.39
   1  -6  -5   13.38    2.15
   1   6   5   13.08    1.34
   1  -7   5   89.83    3.35
   1   7  -5   92.23    3.31
  -1   7   5   96.16    3.65
  -1  -7  -5   93.45    3.26
   1   7  -5   90.83    2.12
  -1  -7  -5   88.64    2.08
  -1   7   5   86.35    2.02
   1  -7   5   89.62    1.70
  -1  -7   5   89.00    2.26
  -1   7  -5   88.61    2.36
   1   7   5   93.53    3.21
   1  -7  -5   90.06    2.52
  -1   7  -5   89.51    1.66
  -1  -7   5   89.92    1.58
   1  -7  -5   89.67    3.02
   1   7   5   88.62    2.17
   1  -8   5   71.87    2.14
   1   8  -5   76.28    2.17
  -1   8   5   77.26    2.31
  -1  -8  -5   73.49    2.13
   1   8  -5   74.80    1.89
  -1  -8  -5   72.25    1.89
  -1   8   5   73.10    2.70
   1  -8   5   71.73    1.38
  -1  -8   5   75.83    3.11
  -1   8  -5   75.79    2.22
   1   8   5   76.82    3.04
   1  -8  -5   72.08    2.33
  -1   8  -5   72.82    1.39
  -1  -8   5   74.43    1.76
   1  -8  -5   72.49    1.95
   1   8   5   74.78    2.02
   1  -9   5   60.27    2.06
   1   9  -5   60.41    3.10
  -1   9   5   63.30    3.26
  -1  -9  -5   64.80    2.97
   1   9  -5   60.21    1.64
  -1  -9  -5   54.44    1.89
  -1   9   5   52.22    2.69
  -1  -9   5   65.69    2.95
  -1   9  -5   64.64    3.13
   1   9   5   62.70    1.97
   1  -9  -5   59.99    2.21
  -1   9  -5   59.19    1.45
  -1  -9   5   53.90    1.88
   1   9   5   55.60    1.93
   1 -10   5  117.24    3.88
   1  10  -5  117.32    3.83
  -1  10   5  120.98    4.11
  -1 -10  -5  119.72    3.76
   1  10  -5  120.99    2.24
  -1 -10  -5  131.88    4.40
  -1  10   5  126.85    3.16
  -1 -10   5  120.78    3.71
  -1  10  -5  123.56    4.05
   1  10   5  120.28    3.71
   1 -10  -5  119.24    3.01
  -1  10  -5  118.36    1.91
  -1 -10   5  116.33    2.57
   1 -10  -5  107.21    4.50
   1  10   5  120.25    3.97
   1 -11   5    0.82    1.43
   1  11  -5    1.68    2.31
  -1  11   5    2.50    2.49
  -1 -11  -5    1.57    1.35
   1  11  -5    1.90    0.90
  -1 -11  -5   -1.20    1.82
   1 -11   5   -0.26    0.66
  -1  11   5    1.77    1.72
  -1 -11   5    2.53    1.36
  -1  11  -5   -0.54    1.48
   1  11   5    2.49    2.16
   1 -11  -5    2.70    1.51
  -1  11  -5    2.32    0.44
  -1 -11   5    0.17    0.86
   1 -11  -5   -0.68    1.89
   1  11   5    2.12    1.88
   1 -12   5    3.86    2.47
   1  12  -5    2.91    2.37
  -1  12   5    4.04    1.66
  -1 -12  -5    4.75    1.44
   1  12  -5    5.51    1.16
  -1 -12  -5    5.51    1.19
   1 -12   5    3.57    0.51
  -1  12   5    5.37    1.89
  -1 -12   5    7.33    2.32
  -1  12  -5    6.18    2.48
   1  12   5    5.71    2.25
   1 -12  -5    1.13    2.65
  -1  12  -5    5.50    0.50
  -1 -12   5    4.53    0.85
   1 -12  -5    2.41    2.00
   1  12   5    7.82    1.89
   1  13  -5    1.30    1.49
  -1  13   5   -0.85    2.63
  -1 -13  -5    2.89    2.31
   1  13  -5    1.21    1.02
  -1 -13  -5    1.42    1.70
  -1  13   5   -0.45    1.67
   1 -13   5    1.48    0.28
  -1 -13   5    1.48    1.40
  -1  13  -5    2.33    1.60
   1  13   5    1.48    1.37
   1 -13  -5    2.40    1.58
  -1 -13   5    0.80    0.70
   1 -13  -5    1.72    1.02
   1  13   5    0.19    1.78
   1  14  -5    1.70    2.45
  -1  14   5   -0.06    1.64
  -1 -14  -5    1.58    2.33
  -1 -14  -5   -0.92    1.66
  -1  14   5    2.19    1.02
  -1  14  -5   -0.75    2.62
   1  14   5    1.57    2.32
   1 -14  -5    0.78    1.66
  -1  14  -5    0.45    1.63
  -1 -14   5    0.58    0.66
   1 -14  -5    1.13    1.03
   1  14   5    0.20    1.76
   1  15  -5    1.87    1.61
  -1  15   5    0.24    2.79
  -1 -15  -5    2.49    1.56
   1  15  -5    3.10    2.51
  -1 -15  -5    2.74    1.07
  -1  15   5    2.76    1.68
  -1  15  -5    3.72    1.72
   1  15   5    3.04    1.52
   1 -15  -5    2.01    2.79
  -1  15  -5    1.37    1.69
  -1 -15   5    1.52    0.65
   1 -15  -5    1.30    1.74
   1  15   5    2.91    1.85
  -1 -15   5    2.05    0.65
   1  16  -5    2.56    2.70
  -1  16   5    2.77    1.79
  -1 -16  -5    4.96    1.64
   1  16  -5    3.18    2.66
  -1 -16  -5    2.34    1.87
  -1  16   5    2.61    1.76
  -1  16  -5    3.00    1.80
   1  16   5    2.49    2.52
   1 -16  -5    5.25    2.98
  -1  16  -5    2.53    1.81
  -1 -16   5    0.43    0.83
   1 -16  -5   -0.70    1.83
   1  16   5    1.19    1.86
  -1 -16   5    1.66    0.61
   1  17  -5    1.17    2.86
  -1  17   5    1.80    1.85
  -1 -17  -5    0.77    2.77
   1  17  -5    1.81    2.78
  -1 -17  -5   -0.66    1.14
  -1  17   5    1.05    1.03
  -1  17  -5   -0.35    3.04
   1  17   5    3.06    1.65
   1 -17  -5   -0.46    3.06
  -1  17  -5    0.45    1.93
  -1 -17   5    1.28    0.55
   1 -17  -5    1.26    1.09
   1  17   5    1.11    1.86
  -1 -17   5    0.14    0.56
   1  18  -5   32.41    3.46
  -1  18   5   35.84    3.66
  -1 -18  -5   31.97    3.40
   1  18  -5   30.53    3.39
  -1 -18  -5   32.53    2.52
  -1  18   5   30.93    2.12
  -1  18  -5   30.67    3.71
   1  18   5   33.03    2.17
   1 -18  -5   39.04    3.81
  -1  18  -5   30.88    2.41
   1 -18  -5   35.03    2.48
   1  18   5   32.12    2.36
   1  19  -5   -0.02    1.97
  -1  19   5   -0.37    3.16
  -1 -19  -5    0.68    3.10
   1  19  -5    1.02    3.03
  -1 -19  -5   -0.59    1.92
  -1  19   5   -0.09    1.74
  -1  19  -5   -2.61    3.38
   1  19   5    2.21    2.94
   1 -19  -5    0.67    3.39
  -1  19  -5    0.50    2.10
  -1 -19   5    0.59    0.64
   1 -19  -5    0.86    1.14
  -1 -19   5    1.27    0.56
   1  19   5   -1.53    1.99
   1  20  -5   12.93    2.17
  -1  20   5   15.92    3.57
  -1 -20  -5   13.97    3.40
   1  20  -5   11.97    3.41
  -1 -20  -5   16.42    1.70
  -1  20   5   12.14    1.91
  -1  20  -5   15.37    3.67
   1  20   5   12.74    3.25
   1 -20  -5    9.85    3.69
  -1  20  -5   12.45    3.77
  -1 -20   5   12.81    0.73
   1  20   5   10.68    2.11
   1  21  -5    6.81    2.19
  -1  21   5    8.18    3.59
  -1 -21  -5    9.49    3.34
   1  21  -5    3.92    3.43
  -1 -21  -5    7.60    2.13
  -1  21   5    5.77    1.18
  -1  21  -5    4.80    3.73
   1  21   5   14.27    3.26
   1 -21  -5    3.10    3.77
  -1  21  -5   10.83    3.86
   1 -21  -5    2.02    1.99
   1  21   5    8.66    2.03
   1  22  -5  119.88    3.98
  -1  22   5  127.99    5.65
   1  22  -5  115.57    5.25
  -1 -22  -5  120.00    5.40
  -1 -22  -5  122.06    4.20
  -1  22   5  128.07    3.41
  -1  22  -5  118.45    5.85
   1  22   5  127.96    5.21
  -1  22  -5  129.20    5.83
   1 -22  -5  122.01    5.84
   1 -22  -5  118.85    3.71
   1  22   5  129.02    3.79
   1  23  -5   23.32    2.60
  -1  23   5   30.92    4.17
   1  23  -5   25.85    3.92
  -1 -23  -5   24.85    2.46
  -1 -23  -5   26.74    2.81
  -1  23   5   23.77    2.09
  -1  23  -5   25.25    4.39
   1  23   5   24.71    3.71
  -1  23  -5   22.30    2.80
   1 -23  -5   24.04    2.68
   1 -23  -5   23.65    2.27
   1  23   5   25.99    2.37
   1  24  -5   12.99    2.49
  -1  24   5   15.55    4.02
   1  24  -5   13.44    2.40
  -1 -24  -5   11.95    2.39
  -1 -24  -5   13.59    1.41
  -1  24   5   13.14    1.97
  -1  24  -5    8.95    2.71
   1  24   5   12.78    3.59
  -1  24  -5   13.56    2.68
   1 -24  -5   14.57    2.57
   1 -24  -5   12.06    1.84
   1  24   5   11.42    1.45
   1  25  -5    7.57    4.02
  -1  25   5    7.91    4.14
   1  25  -5    7.31    2.49
  -1 -25  -5    7.76    3.81
  -1 -25  -5    7.62    2.07
  -1  25   5    8.72    1.87
  -1  25  -5   10.96    2.75
   1  25   5    8.92    2.32
  -1  25  -5    3.94    4.21
   1 -25  -5    5.21    2.60
   1 -25  -5    8.53    1.80
   1  25   5    8.20    1.39
   1  26  -5    8.38    4.13
  -1  26   5    7.00    4.19
   1  26  -5   10.27    3.91
  -1 -26  -5    2.59    3.95
  -1 -26  -5    7.30    2.28
  -1  26   5    8.35    2.01
  -1  26  -5    8.05    2.84
   1  26   5    4.06    2.41
  -1  26  -5    2.05    4.50
   1 -26  -5    5.90    4.21
   1 -26  -5    4.89    1.21
   1  26   5    1.79    2.15
   1  27  -5   -1.36    4.19
  -1  27   5    5.97    2.56
   1  27  -5    4.40    4.07
  -1 -27  -5    1.30    3.97
  -1 -27  -5   -1.27    2.11
  -1  27   5   -0.67    1.95
  -1  27  -5    7.37    4.41
   1  27   5    0.80    2.37
  -1  27  -5    3.71    2.74
   1 -27  -5   -2.80    4.46
   1 -27  -5    2.01    1.74
   1  27   5    1.83    2.17
   1  28  -5   20.18    3.06
  -1  28   5   24.20    3.03
   1  28  -5   21.75    2.94
  -1 -28  -5   22.93    2.95
  -1 -28  -5   23.60    2.43
  -1  28   5   23.53    2.32
  -1  28  -5   18.37    5.09
   1  28   5   21.73    4.47
  -1  28  -5   28.42    5.08
   1 -28  -5   22.73    3.17
   1 -28  -5   24.59    2.07
   1  28   5   22.25    2.51
   1  29  -5    3.29    2.80
  -1  29   5    0.23    4.66
   1  29  -5    0.60    2.76
  -1 -29  -5   -1.40    4.42
  -1 -29  -5    3.62    2.35
  -1  29  -5    3.70    4.78
   1  29   5    3.72    4.20
  -1  29  -5    1.42    4.69
   1 -29  -5    2.36    2.92
   1 -29  -5    2.74    2.02
   1  29   5    1.89    1.42
   1  30  -5    6.32    4.77
  -1  30   5    8.86    4.82
   1  30  -5    5.52    4.63
  -1 -30  -5   11.00    2.64
  -1  30  -5    7.96    3.17
   1  30   5    9.39    2.77
  -1  30  -5    6.67    3.08
   1 -30  -5    0.32    4.99
   1  31  -5   10.08    4.99
  -1  31   5   10.02    3.19
   1  31  -5    2.91    4.85
   1  31   5    6.42    2.92
  -1  31  -5   13.82    5.25
   1  31   5    7.02    2.84
  -1  31  -5    5.08    5.18
   1   0   6  203.51    4.74
  -1   0   6  200.53    3.80
  -1   0  -6  202.15    3.82
   1   0  -6  206.94    5.13
   1   0  -6  201.06    3.51
  -1   0   6  200.12    3.67
  -1   0  -6  201.53    4.37
   1   0   6  199.80    3.51
   1  -1   6  247.30    4.31
  -1   1   6  249.59    4.56
   1   1  -6  246.09    5.81
  -1  -1  -6  241.83    5.57
   1   1  -6  241.67    4.07
  -1   1   6  242.11    4.35
  -1  -1  -6  242.93    4.13
   1  -1   6  244.13    4.94
  -1  -1   6  247.81    4.48
   1   1   6  244.68    5.44
  -1   1  -6  247.22    4.49
   1  -1  -6  244.74    5.86
   1  -1  -6  241.33    5.21
  -1  -1   6  250.30    4.31
  -1   1  -6  246.46    4.89
   1   1   6  246.62    4.24
   1  -2   6   90.63    2.21
   1   2  -6   97.91    3.50
  -1   2   6   88.13    2.36
  -1  -2  -6   90.72    2.27
   1   2  -6   88.10    2.73
  -1   2   6   87.37    2.26
  -1  -2  -6   91.55    2.15
   1  -2   6   89.02    1.90
  -1  -2   6   89.05    2.30
  -1   2  -6   90.50    2.29
   1   2   6   86.02    3.18
   1  -2  -6   88.60    3.44
   1  -2  -6   88.09    3.12
  -1  -2   6   88.67    2.06
  -1   2  -6   89.12    1.87
   1   2   6   89.13    3.14
   1  -3   6   15.61    2.31
   1   3  -6   14.18    1.52
  -1   3   6   15.74    2.53
  -1  -3  -6   15.61    1.39
   1   3  -6   13.51    1.11
  -1   3   6   14.31    1.39
  -1  -3  -6   14.52    2.24
   1  -3   6   15.94    1.69
  -1  -3   6   14.04    1.47
  -1   3  -6   14.56    2.42
   1   3   6   13.26    2.18
   1  -3  -6   11.59    2.52
   1  -3  -6   14.39    1.43
  -1  -3   6   14.59    1.21
  -1   3  -6   13.85    1.68
   1   3   6   15.92    1.42
   1  -4   6    8.34    2.30
   1   4  -6    8.34    1.46
  -1   4   6    8.78    1.48
  -1  -4  -6    7.88    2.18
   1   4  -6    8.28    1.00
  -1   4   6    8.56    1.33
  -1  -4  -6   10.39    2.12
   1  -4   6    9.21    1.48
  -1  -4   6    7.59    1.41
  -1   4  -6    7.50    1.42
   1   4   6    7.20    2.14
   1  -4  -6    8.13    1.53
  -1  -4   6    6.89    1.71
   1  -4  -6    8.62    1.35
  -1   4  -6    8.77    0.91
   1   4   6    9.48    1.36
   1  -5   6  437.24    7.68
   1   5  -6  422.63    7.71
  -1   5   6  435.58    9.22
  -1  -5  -6  430.36    8.96
   1   5  -6  413.78    6.70
  -1  -5  -6  421.78    7.36
  -1   5   6  411.60    7.27
   1  -5   6  423.77    6.60
  -1  -5   6  424.18    8.83
  -1   5  -6  437.61    9.07
   1   5   6  433.98    7.58
   1  -5  -6  419.19    7.85
  -1   5  -6  435.39    6.76
  -1  -5   6  427.82    7.80
   1  -5  -6  421.96    8.67
   1   5   6  418.12    8.54
   1  -6   6  286.01    5.15
   1   6  -6  278.65    5.17
  -1   6   6  287.03    6.63
  -1  -6  -6  283.00    6.32
   1   6  -6  276.63    5.08
  -1  -6  -6  285.27    5.03
  -1   6   6  283.45    4.95
   1  -6   6  285.07    4.69
  -1  -6   6  282.40    5.09
  -1   6  -6  286.23    5.29
   1   6   6  287.04    6.16
   1  -6  -6  285.09    6.75
  -1   6  -6  287.35    4.74
  -1  -6   6  280.73    4.40
   1  -6  -6  290.05    5.15
   1   6   6  278.99    6.12
   1  -7   6   17.28    1.57
   1   7  -6   17.11    1.61
  -1   7   6   18.31    1.63
  -1  -7  -6   18.87    1.55
   1   7  -6   16.36    1.46
  -1  -7  -6   15.72    2.31
  -1   7   6   17.44    2.25
   1  -7   6   14.15    1.28
  -1  -7   6   15.85    2.42
  -1   7  -6   17.89    1.66
   1   7   6   16.03    2.39
   1  -7  -6   20.03    1.73
  -1   7  -6   17.48    1.17
  -1  -7   6   14.53    1.57
   1  -7  -6   17.47    1.51
   1   7   6   17.30    1.50
   1  -8   6 1733.36   47.47
   1   8  -6 1741.09   51.03
  -1   8   6 1749.60   48.68
  -1  -8  -6 1725.41   50.97
   1   8  -6 1774.65   47.90
  -1  -8  -6 1707.53   50.16
   1  -8   6 1897.08   50.13
  -1   8   6 1694.99   50.11
  -1  -8   6 1803.27   50.99
  -1   8  -6 1739.01   48.87
   1   8   6 1773.52   48.61
   1  -8  -6 1724.17   49.39
  -1   8  -6 1859.47   48.46
  -1  -8   6 1849.08   51.25
   1  -8  -6 1704.07   52.19
   1   8   6 1712.84   47.87
   1  -9   6   57.44    2.04
   1   9  -6   62.70    3.13
  -1   9   6   59.87    2.18
  -1  -9  -6   60.67    2.98
   1   9  -6   58.35    1.71
  -1  -9   6   59.53    2.97
  -1   9  -6   60.57    3.26
   1   9   6   57.81    2.00
   1  -9  -6   60.20    2.20
   1 -10   6   22.73    2.65
   1  10  -6   22.61    1.73
  -1  10   6   25.26    2.81
  -1 -10  -6   24.04    1.58
   1  10  -6   25.24    1.23
  -1 -10  -6   22.04    1.48
   1 -10   6   22.66    1.03
  -1  10   6   24.25    2.24
  -1 -10   6   21.56    2.54
  -1  10  -6   24.67    2.77
   1  10   6   21.86    1.58
   1 -10  -6   22.14    1.79
  -1  10  -6   22.85    0.90
  -1 -10   6   22.99    0.90
   1 -10  -6   18.24    2.41
   1  10   6   20.73    2.41
   1 -11   6  126.82    3.00
   1  11  -6  127.60    3.04
  -1  11   6  130.70    4.25
  -1 -11  -6  132.64    4.05
   1  11  -6  126.39    2.37
  -1 -11  -6  128.52    2.76
   1 -11   6  126.61    1.95
  -1  11   6  127.77    2.72
  -1 -11   6  128.37    2.92
  -1  11  -6  131.41    4.28
   1  11   6  129.92    3.83
   1 -11  -6  129.51    4.35
  -1  11  -6  129.41    1.95
  -1 -11   6  127.10    2.40
   1 -11  -6  128.42    2.82
   1  11   6  130.37    3.74
   1 -12   6   34.71    2.80
   1  12  -6   30.66    2.80
  -1  12   6   30.08    3.03
  -1 -12  -6   32.55    2.71
   1  12  -6   32.58    1.22
  -1 -12  -6   31.00    1.46
   1 -12   6   31.65    0.80
  -1  12   6   31.36    1.47
  -1 -12   6   35.93    2.75
  -1  12  -6   29.49    1.93
   1  12   6   31.99    2.60
   1 -12  -6   30.84    1.95
  -1  12  -6   29.31    0.99
  -1 -12   6   31.02    1.16
   1 -12  -6   32.74    2.25
   1  12   6   32.65    2.38
   1 -13   6    0.79    1.50
   1  13  -6    2.19    2.45
  -1  13   6    0.84    1.57
  -1 -13  -6   -1.09    1.46
   1  13  -6    1.04    0.82
  -1 -13  -6    0.79    1.86
   1 -13   6    0.26    0.43
  -1  13   6    0.55    1.11
  -1 -13   6    0.71    1.44
  -1  13  -6   -0.53    2.59
   1  13   6   -1.09    1.41
   1 -13  -6    1.55    2.61
  -1  13  -6   -0.24    0.60
  -1 -13   6    0.34    0.80
   1 -13  -6   -0.45    1.87
   1  13   6   -0.27    1.96
   1 -14   6   90.31    2.66
   1  14  -6   87.27    2.68
  -1  14   6   91.74    4.03
  -1 -14  -6   89.27    3.72
   1  14  -6   88.33    2.03
  -1 -14  -6   90.37    2.22
   1 -14   6   91.58    1.25
  -1  14   6   90.21    3.02
  -1 -14   6   92.44    3.62
  -1  14  -6   85.69    2.75
   1  14   6   90.38    2.50
   1 -14  -6   90.48    2.90
  -1  14  -6   90.03    1.27
  -1 -14   6   90.84    1.67
   1 -14  -6   89.63    2.99
   1  14   6   87.45    2.28
   1  15  -6   30.55    3.14
  -1  15   6   32.95    2.07
  -1 -15  -6   31.72    1.96
   1  15  -6   30.01    1.33
  -1 -15  -6   38.70    2.53
  -1  15   6   35.65    2.38
  -1 -15   6   31.03    2.93
  -1  15  -6   32.77    3.33
   1  15   6   33.07    2.86
   1 -15  -6   35.34    3.36
  -1  15  -6   31.50    2.13
  -1 -15   6   32.36    1.07
   1 -15  -6   36.00    2.54
   1  15   6   31.75    1.62
   1  16  -6   32.08    2.16
  -1  16   6   35.77    3.43
  -1 -16  -6   32.83    2.08
   1  16  -6   33.21    2.13
  -1 -16  -6   32.69    2.37
  -1  16   6   34.45    2.28
  -1  16  -6   30.88    2.21
   1  16   6   34.09    1.98
   1 -16  -6   31.43    3.41
  -1  16  -6   33.99    2.26
  -1 -16   6   33.34    0.98
   1 -16  -6   32.60    1.57
   1  16   6   32.25    1.64
  -1 -16   6   34.30    0.96
   1  17  -6   25.01    3.41
  -1  17   6   26.71    2.15
  -1 -17  -6   29.68    3.36
   1  17  -6   29.91    2.06
  -1 -17  -6   22.16    1.61
  -1  17   6   25.35    2.29
  -1  17  -6   23.88    2.23
   1  17   6   29.56    3.10
   1 -17  -6   26.85    3.59
  -1  17  -6   24.74    2.31
  -1 -17   6   25.00    0.92
   1 -17  -6   22.36    2.51
   1  17   6   24.58    1.57
  -1 -17   6   25.58    0.86
   1  18  -6  151.00    5.61
  -1  18   6  153.00    4.05
  -1 -18  -6  161.08    5.52
   1  18  -6  154.88    4.01
  -1 -18  -6  147.45    4.43
  -1  18   6  152.14    3.21
  -1  18  -6  148.70    5.75
   1  18   6  159.66    5.27
   1 -18  -6  157.92    4.36
  -1  18  -6  157.91    4.23
   1 -18  -6  150.95    4.17
  -1 -18   6  159.32    2.53
   1  18   6  153.08    3.33
  -1 -18   6  158.07    2.43
   1  19  -6    7.14    2.10
  -1  19   6    8.58    3.44
  -1 -19  -6   10.94    3.31
   1  19  -6    7.68    2.01
  -1 -19  -6    5.97    1.72
  -1  19   6    8.57    1.35
  -1  19  -6    5.65    3.58
   1  19   6    5.21    1.91
   1 -19  -6    5.91    2.27
  -1  19  -6    6.37    2.31
  -1 -19   6    7.00    0.72
   1  19   6    7.00    1.45
  -1 -19   6    7.21    0.54
   1  20  -6   31.24    2.54
  -1  20   6   37.07    3.99
  -1 -20  -6   30.79    3.79
   1  20  -6   32.11    2.43
  -1 -20  -6   30.60    2.71
  -1  20   6   33.01    2.39
  -1  20  -6   30.04    4.12
   1  20   6   33.76    2.31
   1 -20  -6   32.50    2.68
  -1  20  -6   30.86    2.71
   1 -20  -6   30.79    2.50
  -1 -20   6   35.06    0.93
  -1 -20   6   31.83    0.73
   1  20   6   32.49    1.76
   1  21  -6   10.32    2.35
  -1  21   6   11.54    3.73
  -1 -21  -6    9.23    3.55
   1  21  -6   10.13    2.17
  -1 -21  -6   18.47    3.12
  -1  21   6    8.12    2.13
  -1  21  -6   11.19    3.90
   1  21   6    9.29    3.33
   1 -21  -6   10.33    2.46
  -1  21  -6    9.88    2.44
   1 -21  -6   16.98    2.92
   1  21   6   10.06    1.44
   1  22  -6    8.63    2.39
  -1  22   6    8.67    3.90
  -1 -22  -6   10.20    3.62
   1  22  -6    8.10    2.31
  -1 -22  -6   11.09    1.69
  -1  22   6    9.23    2.14
  -1  22  -6    7.86    4.02
   1  22   6   10.72    3.39
   1 -22  -6   12.73    2.53
  -1  22  -6    9.30    2.58
   1 -22  -6    8.55    1.53
   1  22   6   10.63    1.48
   1  23  -6   11.42    2.57
  -1  23   6   11.33    4.01
   1  23  -6   13.06    2.46
  -1 -23  -6   11.12    3.78
  -1 -23  -6   11.89    2.69
  -1  23   6   12.69    1.38
  -1  23  -6   13.50    4.23
   1  23   6   13.71    3.50
  -1  23  -6   16.04    4.31
   1 -23  -6   15.44    4.06
   1 -23  -6   11.40    2.26
   1  23   6   11.49    1.56
   1  24  -6   53.84    3.23
  -1  24   6   54.01    4.86
   1  24  -6   58.40    4.69
  -1 -24  -6   54.24    4.57
  -1 -24  -6   58.49    3.02
  -1  24   6   58.07    2.79
  -1  24  -6   56.11    5.10
   1  24   6   55.70    4.27
  -1  24  -6   55.80    5.26
   1 -24  -6   54.17    4.97
   1 -24  -6   56.86    2.67
   1  24   6   58.91    3.04
   1  25  -6    1.72    2.50
  -1  25   6    3.06    4.05
   1  25  -6    2.92    3.84
  -1 -25  -6    1.94    3.82
  -1 -25  -6    1.02    2.28
  -1  25   6    1.50    2.06
  -1  25  -6    8.06    4.34
   1  25   6    0.65    3.50
  -1  25  -6    5.34    2.60
   1 -25  -6    4.14    4.11
   1 -25  -6    1.10    1.20
   1  25   6    0.12    2.26
   1  26  -6   30.86    2.97
  -1  26   6   29.54    4.49
   1  26  -6   32.90    4.46
  -1 -26  -6   28.11    2.92
  -1 -26  -6   31.38    1.90
  -1  26   6   30.31    1.69
  -1  26  -6   23.22    4.94
   1  26   6   29.46    4.23
  -1  26  -6   30.19    3.24
   1 -26  -6   27.49    4.76
   1 -26  -6   33.58    2.61
   1  26   6   32.30    2.72
   1  27  -6   11.86    2.82
  -1  27   6   13.32    4.38
   1  27  -6   11.27    2.72
  -1 -27  -6   13.35    2.69
  -1 -27  -6    9.93    2.43
  -1  27   6   14.63    2.32
  -1  27  -6   14.63    3.06
   1  27   6   10.47    2.53
  -1  27  -6    7.60    4.80
   1 -27  -6   10.53    2.94
   1  27   6   11.56    2.47
   1  28  -6   40.11    5.29
  -1  28   6   34.14    5.07
   1  28  -6   41.14    3.27
  -1 -28  -6   36.68    4.89
  -1 -28  -6   37.76    2.87
  -1  28   6   39.38    2.89
  -1  28  -6   40.22    3.60
   1  28   6   36.85    3.11
  -1  28  -6   44.29    5.60
   1 -28  -6   35.87    3.55
   1 -28  -6   39.51    2.51
   1  28   6   41.51    3.12
   1  29  -6   16.30    4.98
  -1  29   6   19.70    3.19
   1  29  -6   21.52    4.90
  -1 -29  -6   14.82    4.61
  -1 -29  -6   11.87    2.82
  -1  29   6   18.61    2.49
  -1  29  -6   15.53    5.24
   1  29   6   16.92    2.81
  -1  29  -6   15.18    3.23
   1 -29  -6   17.66    5.12
   1 -29  -6   16.06    2.45
   1  29   6   19.11    1.83
   1  30  -6    1.91    4.81
  -1  30   6   11.06    2.98
   1  30  -6    2.45    4.79
  -1 -30  -6    4.87    4.72
  -1 -30  -6    1.65    2.63
  -1  30  -6    3.56    5.23
   1  30   6    3.97    4.32
  -1  30  -6    5.92    3.19
   1 -30  -6    3.41    4.97
   1  30   6    0.97    2.61
   1   0   7   -1.91    1.27
  -1   0   7   -0.71    1.43
  -1   0  -7    0.55    1.31
   1   0  -7   -2.56    2.41
   1   0  -7    2.73    2.00
  -1   0  -7   -0.17    1.17
  -1   0   7    0.67    1.31
   1  -1   7   31.35    2.59
  -1   1   7   34.64    2.81
   1   1  -7   33.41    1.78
  -1  -1  -7   32.70    1.68
   1   1  -7   32.85    1.50
  -1   1   7   33.20    1.68
  -1  -1  -7   32.19    2.48
   1  -1   7   32.48    2.22
  -1  -1   7   33.39    2.71
   1   1   7   31.57    2.59
  -1   1  -7   30.80    1.69
   1  -1  -7   30.78    2.86
   1  -1  -7   33.75    1.61
  -1   1  -7   32.52    1.44
  -1  -1   7   31.87    2.52
   1   1   7   33.64    2.43
   1  -2   7  491.97   10.17
   1   2  -7  477.69   10.53
  -1   2   7  480.74    8.86
  -1  -2  -7  482.94   10.22
   1   2  -7  470.02    8.07
  -1  -2  -7  487.74    9.90
  -1   2   7  462.90    8.41
   1  -2   7  476.72    8.20
  -1  -2   7  478.85    8.74
  -1   2  -7  480.59   10.20
   1   2   7  481.06    9.94
   1  -2  -7  465.32    8.85
   1  -2  -7  478.09    8.51
  -1   2  -7  482.82    8.26
  -1  -2   7  483.75    9.66
   1   2   7  469.88    8.40
   1  -3   7  147.97    3.06
   1   3  -7  143.70    3.20
  -1   3   7  150.41    4.36
  -1  -3  -7  146.64    4.11
   1   3  -7  142.80    3.50
  -1  -3  -7  142.93    2.98
  -1   3   7  139.51    2.99
   1  -3   7  144.54    3.40
  -1  -3   7  144.86    4.18
  -1   3  -7  143.08    4.25
   1   3   7  147.46    3.05
   1  -3  -7  144.67    4.37
   1  -3  -7  142.98    3.04
  -1   3  -7  147.71    3.40
  -1  -3   7  145.78    2.83
   1   3   7  139.08    2.99
   1  -4   7    1.93    1.33
   1   4  -7    4.10    1.43
  -1   4   7    3.01    1.49
  -1  -4  -7    3.44    2.21
   1   4  -7    1.48    1.02
  -1  -4  -7    3.44    1.32
  -1   4   7    0.95    2.23
   1  -4   7    0.97    1.61
  -1  -4   7    1.77    1.40
  -1   4  -7    2.79    1.44
   1   4   7    1.54    2.14
   1  -4  -7    3.01    1.50
   1  -4  -7   -1.14    2.26
  -1   4  -7    2.00    1.55
  -1  -4   7    0.97    1.85
   1   4   7    2.62    2.25
   1  -5   7   -0.39    2.24
   1   5  -7    0.00    1.44
  -1   5   7    1.51    1.50
  -1  -5  -7    2.17    1.36
   1   5  -7   -1.45    1.63
  -1  -5  -7   -2.51    2.20
  -1   5   7   -3.78    2.27
  -1  -5   7    0.90    2.28
  -1   5  -7    1.35    1.41
   1   5   7    3.25    2.16
   1  -5  -7   -0.88    2.51
  -1   5  -7   -0.90    1.46
   1  -5  -7   -0.06    1.44
   1   5   7   -2.62    1.45
   1  -6   7   96.60    3.45
   1   6  -7   92.76    2.54
  -1   6   7   92.22    2.55
  -1  -6  -7   94.20    2.48
   1   6  -7   94.49    2.90
  -1  -6   7   92.51    2.41
  -1   6  -7   95.07    3.71
   1   6   7   99.09    3.47
   1  -6  -7   95.45    2.68
  -1   6  -7   93.92    2.72
   1  -6  -7   92.40    4.86
   1   6   7   99.92    3.19
   1  -7   7    7.50    2.36
   1   7  -7    3.50    2.52
  -1   7   7    5.61    2.50
  -1  -7  -7    5.72    2.30
   1   7  -7    5.83    1.61
  -1  -7  -7    6.63    2.04
  -1   7   7    0.98    3.30
  -1  -7   7    4.62    1.45
  -1   7  -7    6.58    1.57
   1   7   7    6.50    2.21
   1  -7  -7    4.83    1.61
   1  -8   7  217.60    5.38
   1   8  -7  222.16    4.44
  -1   8   7  220.69    4.41
  -1  -8  -7  226.70    5.58
   1   8  -7  217.79    3.47
  -1  -8  -7  220.41    4.23
  -1   8   7  217.30    5.18
   1  -8   7  224.86    3.83
  -1  -8   7  220.33    4.21
  -1   8  -7  224.82    5.71
   1   8   7  220.83    5.19
   1  -8  -7  226.04    4.75
  -1   8  -7  222.40    3.72
  -1  -8   7  216.64    4.14
   1  -8  -7  222.23    4.23
   1   8   7  221.77    4.26
   1  -9   7   32.02    1.81
   1   9  -7   33.72    2.91
  -1   9   7   34.56    2.98
  -1  -9  -7   30.66    2.77
   1   9  -7   34.02    1.56
  -1  -9  -7   35.68    1.80
   1  -9   7   38.85    1.51
  -1   9   7   31.67    2.69
  -1  -9   7   34.25    1.76
  -1   9  -7   36.22    1.91
   1   9   7   33.92    1.68
   1  -9  -7   33.67    1.98
  -1   9  -7   33.45    1.31
   1  -9  -7   39.47    1.87
   1   9   7   33.53    1.81
   1 -10   7    8.41    1.57
   1  10  -7    9.66    2.55
  -1  10   7   10.08    2.62
  -1 -10  -7    8.36    2.41
   1  10  -7    8.44    0.76
  -1 -10  -7    6.27    1.42
   1 -10   7    7.08    0.98
  -1  10   7    6.71    2.25
  -1 -10   7    9.46    2.36
  -1  10  -7    8.01    1.66
   1  10   7    7.39    2.28
   1 -10  -7    8.12    1.64
  -1  10  -7    7.54    0.93
  -1 -10   7    6.60    0.81
   1 -10  -7    7.12    1.43
   1  10   7    6.37    1.47
   1 -11   7    5.68    2.46
   1  11  -7    6.49    2.49
  -1  11   7    4.09    2.71
  -1 -11  -7    6.31    2.42
   1  11  -7    4.74    1.09
  -1 -11  -7    5.18    2.20
   1 -11   7    4.43    0.84
  -1  11   7    4.10    2.10
  -1 -11   7    5.30    2.32
  -1  11  -7    3.01    1.64
   1  11   7    5.66    2.30
   1 -11  -7    4.19    2.69
  -1  11  -7    4.79    0.80
  -1 -11   7    4.34    1.14
   1 -11  -7    3.80    2.16
   1  11   7    3.78    2.26
   1 -12   7   57.16    2.21
   1  12  -7   61.29    3.30
  -1  12   7   60.47    3.35
  -1 -12  -7   56.10    3.18
   1  12  -7   56.83    1.59
  -1 -12  -7   58.81    2.86
   1 -12   7   60.30    1.26
  -1  12   7   56.48    2.79
  -1 -12   7   53.52    2.10
  -1  12  -7   57.26    3.51
   1  12   7   59.60    3.10
   1 -12  -7   55.95    3.49
  -1  12  -7   55.05    1.23
  -1 -12   7   56.61    1.60
   1 -12  -7   54.92    1.91
   1  12   7   57.19    2.88
   1 -13   7    0.20    1.63
   1  13  -7    3.01    1.66
  -1  13   7    2.20    2.72
  -1 -13  -7    3.06    1.59
   1  13  -7    3.66    0.98
  -1 -13  -7    4.40    2.17
   1 -13   7    3.13    0.67
  -1  13   7    1.41    2.10
  -1 -13   7    2.71    2.53
  -1  13  -7    1.65    1.73
   1  13   7    4.15    2.37
   1 -13  -7    5.03    1.77
  -1  13  -7    3.42    0.65
  -1 -13   7    2.04    0.98
   1 -13  -7    2.48    1.35
   1  13   7    3.79    2.19
   1 -14   7   38.67    3.22
   1  14  -7   37.28    2.18
  -1  14   7   40.62    2.20
  -1 -14  -7   37.43    3.08
   1  14  -7   35.99    1.28
  -1 -14  -7   38.95    1.89
   1 -14   7   37.05    0.91
  -1  14   7   43.00    2.77
  -1 -14   7   35.90    1.99
  -1  14  -7   36.60    2.24
   1  14   7   39.15    2.90
   1 -14  -7   40.26    3.54
  -1  14  -7   37.13    0.92
  -1 -14   7   40.14    1.35
   1 -14  -7   38.71    1.89
   1  14   7   37.12    1.81
   1 -15   7    8.56    2.88
   1  15  -7    2.99    3.05
  -1  15   7    6.73    3.01
  -1 -15  -7    6.87    1.78
   1  15  -7    6.39    0.91
  -1 -15  -7    8.37    2.25
   1 -15   7    6.25    0.63
  -1  15   7    7.07    2.22
  -1 -15   7    5.71    1.72
  -1  15  -7    4.50    3.16
   1  15   7    7.71    1.64
   1 -15  -7    7.31    3.10
  -1  15  -7    5.37    0.58
  -1 -15   7    7.98    0.94
   1 -15  -7    5.24    2.23
   1  15   7    6.17    1.47
   1  16  -7  123.19    3.62
  -1  16   7  132.83    3.62
  -1 -16  -7  129.94    4.79
   1  16  -7  130.13    2.32
  -1 -16  -7  127.13    4.09
  -1  16   7  129.79    2.97
   1 -16   7  128.73    1.56
  -1 -16   7  129.67    4.67
  -1  16  -7  126.44    5.14
   1  16   7  136.11    4.55
   1 -16  -7  125.28    3.72
  -1 -16   7  131.24    2.25
   1 -16  -7  129.18    4.04
   1  16   7  128.23    3.05
   1  17  -7    0.44    3.13
  -1  17   7   -2.06    3.14
  -1 -17  -7    2.78    3.00
  -1 -17  -7    0.47    1.66
  -1  17   7    1.79    1.36
  -1  17  -7    0.43    2.05
   1  17   7    2.20    1.70
   1 -17  -7    1.16    2.08
  -1  17  -7   -3.10    3.31
   1 -17  -7   -0.65    2.47
   1  17   7   -1.07    1.45
   1  18  -7   55.99    4.26
  -1  18   7   57.32    2.68
  -1 -18  -7   56.45    2.70
   1  18  -7   56.83    4.01
  -1 -18  -7   48.57    3.40
  -1  18   7   58.70    2.07
  -1  18  -7   54.84    4.36
   1  18   7   60.85    3.75
   1 -18  -7   54.16    4.41
  -1  18  -7   57.54    4.35
   1 -18  -7   49.59    2.20
  -1 -18   7   56.70    1.39
   1  18   7   57.23    3.18
  -1 -18   7   56.26    1.39
   1  19  -7   57.23    2.86
  -1  19   7   57.15    2.78
  -1 -19  -7   52.68    2.74
   1  19  -7   59.85    4.20
  -1 -19  -7   51.65    2.33
  -1  19   7   55.33    3.00
  -1  19  -7   51.33    4.52
   1  19   7   59.49    3.79
   1 -19  -7   59.31    4.60
  -1  19  -7   60.72    4.53
  -1 -19   7   55.26    1.48
   1  19   7   57.31    3.15
  -1 -19   7   53.95    1.25
   1  20  -7   74.24    3.27
  -1  20   7   76.04    4.76
  -1 -20  -7   76.63    3.18
   1  20  -7   78.11    4.65
  -1 -20  -7   68.45    3.85
  -1  20   7   78.95    3.29
  -1  20  -7   69.95    5.09
   1  20   7   77.37    2.90
   1 -20  -7   73.89    5.11
  -1  20  -7   80.36    4.86
   1 -20  -7   75.75    2.62
  -1 -20   7   76.74    1.26
   1  20   7   78.61    3.45
  -1 -20   7   78.93    1.33
   1  21  -7   -0.02    2.31
  -1  21   7    1.18    3.62
  -1 -21  -7   -2.02    2.16
   1  21  -7    5.62    3.53
  -1  21   7   -1.24    2.20
  -1  21  -7    0.24    3.95
   1  21   7    3.55    2.00
   1 -21  -7    8.29    3.96
  -1  21  -7   -0.77    3.82
   1  21   7   -4.26    2.39
   1  22  -7  296.57    9.42
  -1  22   7  301.65    9.03
  -1 -22  -7  295.06    7.28
   1  22  -7  299.10    9.11
  -1 -22  -7  300.95    7.85
  -1  22   7  306.54    7.12
  -1  22  -7  297.61    7.59
   1  22   7  294.98    8.42
   1 -22  -7  291.40    9.61
  -1  22  -7  297.57    9.53
   1 -22  -7  295.61    6.06
   1  22   7  307.77    7.46
   1  23  -7   14.29    4.19
  -1  23   7    9.54    2.45
  -1 -23  -7   14.22    2.45
   1  23  -7   13.08    3.93
  -1 -23  -7   12.00    2.61
  -1  23   7   13.17    2.36
  -1  23  -7    8.65    2.83
   1  23   7   17.10    3.51
   1 -23  -7    9.59    4.16
  -1  23  -7    8.63    4.33
   1 -23  -7   12.23    2.36
   1  23   7   11.61    2.57
   1  24  -7   -1.03    4.16
  -1  24   7    1.69    2.41
  -1 -24  -7    1.23    2.34
   1  24  -7   -3.79    3.88
  -1 -24  -7    2.43    1.49
  -1  24   7    1.91    1.41
  -1  24  -7    4.01    2.68
   1  24   7    5.72    3.41
   1 -24  -7    2.79    4.06
  -1  24  -7    4.48    2.56
   1 -24  -7    1.83    2.19
   1  24   7    3.14    2.45
   1  25  -7    4.27    4.13
  -1  25   7    5.51    2.48
   1  25  -7    5.80    3.90
  -1 -25  -7    5.64    2.47
  -1 -25  -7    2.70    2.74
  -1  25   7    2.17    2.35
  -1  25  -7    3.58    2.77
   1  25   7   -0.57    3.52
  -1  25  -7    1.80    2.70
   1 -25  -7    4.12    2.63
   1 -25  -7    3.35    1.48
   1  25   7    2.16    2.57
   1  26  -7    0.04    4.27
  -1  26   7   -0.02    2.45
   1  26  -7    2.32    2.45
  -1 -26  -7    0.97    2.45
  -1 -26  -7    1.29    2.53
  -1  26   7   -0.50    2.32
  -1  26  -7    1.70    4.52
   1  26   7    1.15    3.59
  -1  26  -7   -0.58    2.75
   1 -26  -7    0.22    2.79
   1 -26  -7    0.09    2.23
   1  26   7    0.22    2.55
   1  27  -7    8.41    4.73
  -1  27   7   10.19    4.46
   1  27  -7    9.40    2.81
  -1 -27  -7   11.53    4.38
  -1 -27  -7   14.24    2.69
  -1  27   7   13.97    2.66
  -1  27  -7   13.02    5.03
   1  27   7   19.03    4.04
  -1  27  -7    8.62    4.86
   1 -27  -7   14.48    2.96
   1 -27  -7   14.08    2.29
   1  27   7   10.71    1.80
   1  28  -7   -2.16    2.90
  -1  28   7    5.55    4.30
   1  28  -7    3.15    2.80
  -1 -28  -7   -2.64    4.37
  -1 -28  -7    1.38    1.80
  -1  28   7    0.73    1.59
  -1  28  -7    2.90    4.87
   1  28   7    6.76    4.00
  -1  28  -7   -1.99    4.88
   1 -28  -7    5.27    4.75
   1 -28  -7    2.85    2.33
   1  28   7    1.57    1.74
   1  29  -7   14.10    3.32
  -1  29   7   19.20    4.99
   1  29  -7   14.86    5.05
  -1 -29  -7   21.67    4.90
  -1 -29  -7   21.47    3.44
  -1  29   7   19.24    2.80
  -1  29  -7   12.58    5.39
   1  29   7   22.76    2.85
  -1  29  -7   13.22    3.30
   1 -29  -7   15.02    5.30
   1 -29  -7   19.06    1.73
   1  29   7   15.43    3.02
   1  30  -7    2.50    3.08
  -1  30   7    5.31    4.79
   1  30  -7    4.93    4.84
  -1 -30  -7   -0.42    2.92
  -1 -30  -7    0.50    2.56
  -1  30  -7    4.00    3.23
   1  30   7    1.45    2.61
  -1  30  -7   -0.72    3.16
   1 -30  -7    2.93    5.05
   1 -30  -7    1.20    2.32
   1  30   7   -0.66    2.79
   1   0   8   72.79    3.14
  -1   0   8   75.03    3.31
  -1   0  -8   57.57    3.52
  -1   0   8   58.27    4.44
   1   0   8   64.41    2.99
   1  -1   8  222.19    4.19
  -1   1   8  225.75    5.61
   1   1  -8  223.87    4.49
  -1  -1  -8  228.60    5.50
   1   1  -8  213.77    4.55
  -1  -1  -8  199.74    6.03
  -1   1   8  211.94    4.86
   1  -1   8  215.81    7.24
  -1  -1   8  228.17    4.35
   1   1   8  224.32    4.20
  -1   1  -8  227.83    5.62
   1  -1  -8  224.57    5.77
   1  -1  -8  202.54    4.73
  -1   1  -8  217.18    4.42
  -1  -1   8  220.42    7.03
   1   1   8  211.33    7.67
   1  -2   8  186.91    3.69
  -1   2   8  185.36    3.80
   1   2  -8  188.19    5.21
  -1  -2  -8  188.96    3.86
   1   2  -8  186.95    3.98
  -1   2   8  180.94    4.62
  -1  -2   8  187.60    4.91
   1   2   8  184.18    3.61
  -1   2  -8  187.50    3.86
   1  -2  -8  185.61    3.90
   1  -2  -8  186.96    4.42
  -1   2  -8  184.34    3.91
  -1  -2   8  193.69    4.88
   1  -3   8    9.31    2.39
   1   3  -8   11.60    2.64
  -1   3   8   10.24    1.57
  -1  -3  -8    8.86    2.39
  -1  -3   8   12.12    2.47
  -1   3  -8    9.90    1.56
   1   3   8    8.15    2.29
   1  -3  -8    9.62    1.68
   1  -4   8   81.73    3.28
   1   4  -8   79.64    3.54
  -1   4   8   83.23    2.38
  -1  -4  -8   78.73    2.28
   1   4  -8   79.80    3.33
  -1  -4  -8   83.78    3.20
  -1   4   8   72.45    4.81
   1  -4   8   74.24    2.48
  -1  -4   8   79.22    2.30
  -1   4  -8   81.29    2.43
   1   4   8   81.03    3.15
   1  -4  -8   80.25    3.58
   1  -4  -8   68.84    3.08
  -1  -4   8   78.49    2.83
   1  -5   8   25.27    2.55
   1   5  -8   24.61    1.77
  -1   5   8   23.99    1.74
  -1  -5  -8   21.47    2.54
   1   5  -8   21.77    1.26
  -1  -5  -8   17.22    1.84
  -1   5   8   21.56    1.72
   1  -5   8   20.08    1.93
  -1  -5   8   25.03    1.66
  -1   5  -8   24.77    1.76
   1   5   8   27.30    2.47
   1  -5  -8   26.94    2.88
  -1   5  -8   19.18    1.25
   1  -5  -8   17.14    2.72
  -1  -5   8   24.34    2.26
   1   5   8   20.11    1.72
   1  -6   8    1.44    2.27
   1   6  -8    2.50    1.53
  -1   6   8    0.77    2.51
  -1  -6  -8    1.97    2.28
   1   6  -8    0.65    1.54
  -1  -6  -8   -1.91    2.41
  -1   6   8    1.21    1.44
  -1  -6   8    0.84    1.44
  -1   6  -8    2.35    2.44
   1   6   8    0.63    2.20
   1  -6  -8    2.24    1.58
  -1   6  -8    1.34    1.38
   1  -6  -8   -1.25    1.46
  -1  -6   8   -2.88    1.84
   1   6   8    1.72    2.36
   1  -7   8    2.74    2.41
   1   7  -8    0.10    2.49
  -1   7   8    2.75    1.53
  -1  -7  -8    2.07    1.45
   1   7  -8    1.15    1.51
  -1  -7  -8    2.60    2.58
  -1   7   8    2.53    1.49
  -1  -7   8    1.89    1.41
  -1   7  -8    1.38    1.51
   1   7   8    3.25    2.27
   1  -7  -8    1.84    1.61
  -1   7  -8    2.57    1.43
   1  -7  -8    4.46    1.59
  -1  -7   8    5.56    1.24
   1   7   8    6.67    1.60
   1  -8   8  132.68    3.05
   1   8  -8  128.97    3.20
  -1   8   8  130.37    4.32
  -1  -8  -8  131.45    3.15
   1   8  -8  126.02    2.91
  -1  -8  -8  126.08    4.28
   1  -8   8  138.08    2.90
  -1   8   8  130.27    4.18
  -1  -8   8  135.79    3.03
  -1   8  -8  136.39    4.39
   1   8   8  132.77    2.96
   1  -8  -8  135.61    3.31
  -1   8  -8  134.84    2.78
   1  -8  -8  127.27    4.23
  -1  -8   8  130.72    3.33
   1   8   8  124.79    3.06
   1  -9   8   22.26    1.70
   1   9  -8   22.81    1.78
  -1   9   8   22.26    1.81
  -1  -9  -8   22.01    1.74
   1   9  -8   19.05    1.52
  -1  -9  -8   19.87    2.61
   1  -9   8   21.03    1.35
  -1   9   8   21.17    2.51
  -1  -9   8   24.12    2.60
  -1   9  -8   24.68    2.90
   1   9   8   21.82    2.46
   1  -9  -8   20.88    2.99
  -1   9  -8   19.17    1.31
   1  -9  -8   23.22    2.67
  -1  -9   8   20.47    1.65
   1   9   8   20.89    2.65
   1 -10   8  344.15    7.94
   1  10  -8  354.30    8.39
  -1  10   8  357.14    6.91
  -1 -10  -8  353.06    7.01
   1  10  -8  351.38    6.28
  -1 -10  -8  349.39    7.71
   1 -10   8  355.90    5.88
  -1  10   8  343.59    7.58
  -1 -10   8  358.47    7.95
  -1  10  -8  349.43    8.38
   1  10   8  357.35    7.87
   1 -10  -8  360.16    8.76
  -1  10  -8  346.64    5.79
   1 -10  -8  361.57    7.90
  -1 -10   8  352.57    6.41
   1  10   8  350.76    7.80
   1 -11   8    0.12    1.55
   1  11  -8   -0.74    2.63
  -1  11   8   -1.13    1.59
  -1 -11  -8   -0.95    1.58
   1  11  -8   -0.32    1.18
  -1 -11  -8   -1.63    2.33
   1 -11   8   -0.35    0.98
  -1  11   8    2.33    2.21
  -1 -11   8    0.06    1.54
  -1  11  -8    0.83    2.71
   1  11   8    0.44    1.41
   1 -11  -8    3.34    1.68
  -1  11  -8   -0.02    0.89
   1 -11  -8   -1.32    2.31
  -1 -11   8    0.67    1.26
   1  11   8    0.91    1.47
   1 -12   8    1.84    2.66
   1  12  -8   -0.45    2.78
  -1  12   8    1.71    1.65
  -1 -12  -8    0.99    2.58
   1  12  -8    1.52    1.12
  -1 -12  -8   -2.79    2.49
  -1  12   8   -0.44    2.30
  -1 -12   8    2.37    2.54
  -1  12  -8   -0.11    2.87
   1  12   8    0.41    1.46
   1 -12  -8   -0.61    1.74
  -1  12  -8    1.01    0.85
   1 -12  -8   -1.61    2.38
  -1 -12   8   -0.98    1.26
   1  12   8   -0.67    1.49
   1 -13   8  134.55    4.68
   1  13  -8  133.15    3.51
  -1  13   8  130.49    3.51
  -1 -13  -8  129.76    4.63
   1  13  -8  130.40    2.62
  -1 -13  -8  135.14    4.58
   1 -13   8  129.35    2.27
  -1  13   8  128.89    4.28
  -1 -13   8  126.20    3.25
  -1  13  -8  137.83    3.64
   1  13   8  134.24    3.20
   1 -13  -8  132.75    4.99
  -1  13  -8  130.93    2.28
   1 -13  -8  131.43    4.39
  -1 -13   8  138.56    2.84
   1  13   8  136.57    4.44
   1 -14   8  275.08    5.78
   1  14  -8  272.40    7.58
  -1  14   8  279.32    7.51
  -1 -14  -8  277.54    5.96
   1  14  -8  262.84    4.71
  -1 -14  -8  274.17    5.47
   1 -14   8  277.70    4.10
  -1  14   8  270.86    6.52
  -1 -14   8  277.56    7.12
  -1  14  -8  272.78    7.69
   1  14   8  277.44    5.64
   1 -14  -8  272.77    7.79
  -1  14  -8  280.32    4.28
   1 -14  -8  270.03    6.44
  -1 -14   8  278.92    4.66
   1  14   8  277.37    6.69
   1 -15   8   21.79    2.13
   1  15  -8   24.49    3.47
  -1  15   8   22.53    3.43
  -1 -15  -8   22.80    3.21
   1  15  -8   22.53    1.24
  -1 -15  -8   20.42    3.01
   1 -15   8   23.10    0.88
  -1  15   8   19.00    2.71
  -1 -15   8   27.87    3.22
  -1  15  -8   24.44    2.30
   1  15   8   27.03    3.06
   1 -15  -8   24.39    2.18
  -1  15  -8   21.92    1.09
   1 -15  -8   17.38    2.84
  -1 -15   8   23.15    1.32
   1  15   8   22.89    2.80
   1 -16   8    4.45    3.17
   1  16  -8    0.61    2.05
  -1  16   8    5.52    1.90
  -1 -16  -8    2.28    3.03
   1  16  -8    3.40    1.24
  -1 -16  -8   10.71    3.28
  -1  16   8    4.64    2.59
   1 -16   8    2.68    0.76
  -1 -16   8    4.11    1.85
  -1  16  -8    2.57    3.31
   1  16   8    4.87    1.79
   1 -16  -8    5.28    3.35
  -1  16  -8    2.77    0.69
   1 -16  -8    4.79    1.74
  -1 -16   8    1.92    1.14
   1  16   8    4.66    1.63
   1  17  -8   55.46    4.29
  -1  17   8   51.91    4.08
  -1 -17  -8   52.90    2.70
  -1 -17  -8   53.41    2.39
  -1  17   8   53.41    3.21
   1 -17   8   53.07    0.95
  -1 -17   8   55.73    2.55
  -1  17  -8   56.17    2.82
   1  17   8   56.97    3.55
   1 -17  -8   54.10    4.40
  -1 -17   8   52.89    1.91
   1  17   8   55.01    2.24
   1  18  -8    1.13    3.48
  -1  18   8   -1.50    2.00
  -1 -18  -8    3.99    3.16
   1  18  -8   -0.08    0.81
  -1 -18  -8    0.61    3.24
  -1  18   8    1.34    2.60
  -1  18  -8   -4.46    3.61
   1  18   8    0.38    1.80
   1 -18  -8    0.04    2.19
  -1  18  -8    0.89    3.55
   1 -18  -8   -1.46    2.93
   1  18   8    0.51    1.60
   1  19  -8    0.99    2.27
  -1  19   8    1.56    2.09
  -1 -19  -8    0.07    3.33
   1  19  -8    1.38    3.46
  -1 -19  -8   -1.27    2.74
  -1  19   8    2.47    2.43
  -1  19  -8   -4.53    3.79
   1  19   8    4.90    2.98
   1 -19  -8   -0.02    2.27
  -1  19  -8    2.62    3.59
   1 -19  -8   -0.11    1.69
  -1 -19   8    0.06    0.77
   1  19   8   -0.33    2.55
  -1 -19   8    1.60    0.65
   1  20  -8   33.55    4.35
  -1  20   8   37.68    3.93
  -1 -20  -8   35.13    4.08
   1  20  -8   29.57    4.06
  -1 -20  -8   38.65    3.87
  -1  20  -8   34.54    2.92
   1  20   8   36.86    2.39
   1 -20  -8   35.40    2.93
  -1  20  -8   37.69    4.38
   1 -20  -8   30.04    3.68
  -1 -20   8   33.41    1.24
   1  20   8   32.44    3.05
  -1 -20   8   32.38    0.85
   1  21  -8   30.68    4.34
  -1  21   8   27.78    4.04
  -1 -21  -8   30.55    4.10
   1  21  -8   30.37    4.04
  -1 -21  -8   31.11    3.56
  -1  21   8   31.32    2.83
  -1  21  -8   25.95    2.93
   1  21   8   26.67    2.24
   1 -21  -8   24.85    2.88
  -1  21  -8   27.84    4.39
   1 -21  -8   31.74    3.42
   1  21   8   27.92    2.94
   1  22  -8   10.80    4.21
  -1  22   8   10.56    2.47
  -1 -22  -8   10.74    3.91
   1  22  -8    7.47    4.00
  -1 -22  -8    8.59    2.97
  -1  22   8   13.87    2.57
  -1  22  -8   13.62    2.80
   1  22   8   14.81    3.45
   1 -22  -8   11.72    2.67
  -1  22  -8   13.60    2.74
   1 -22  -8   12.26    2.63
   1  22   8   15.00    2.88
   1  23  -8   17.61    4.22
  -1  23   8   17.28    2.57
  -1 -23  -8   15.71    4.05
   1  23  -8   13.01    4.05
  -1 -23  -8   15.76    2.91
  -1  23   8   13.51    2.69
  -1  23  -8   15.10    2.92
   1  23   8   13.67    3.57
   1 -23  -8   14.80    2.80
  -1  23  -8   14.28    2.77
   1 -23  -8   16.57    2.66
   1  23   8   17.42    2.94
   1  24  -8   54.55    3.39
  -1  24   8   57.02    3.07
  -1 -24  -8   55.65    4.84
   1  24  -8   49.48    3.16
  -1 -24  -8   50.89    3.51
  -1  24   8   54.47    2.25
  -1  24  -8   50.94    3.59
   1  24   8   57.42    4.44
   1 -24  -8   51.81    3.39
  -1  24  -8   55.21    3.42
   1 -24  -8   55.17    3.19
   1  24   8   53.98    3.47
   1  25  -8   49.34    3.54
  -1  25   8   54.58    3.25
  -1 -25  -8   51.69    4.85
   1  25  -8   55.86    3.26
  -1 -25  -8   52.70    2.60
  -1  25   8   57.72    2.32
  -1  25  -8   49.68    3.69
   1  25   8   54.44    4.56
   1 -25  -8   55.18    3.52
  -1  25  -8   52.17    3.47
   1 -25  -8   54.08    2.28
   1  25   8   57.75    3.56
   1  26  -8   -0.44    2.81
  -1  26   8   -0.31    2.57
   1  26  -8    3.92    2.58
  -1 -26  -8   -0.87    4.03
  -1 -26  -8    0.86    2.64
  -1  26   8    1.91    2.61
  -1  26  -8   -1.75    3.06
   1  26   8   -1.42    3.78
  -1  26  -8    0.65    4.56
   1 -26  -8    1.42    2.84
   1 -26  -8    3.33    2.40
   1  26   8    4.24    2.73
   1  27  -8   11.93    3.13
  -1  27   8    8.43    2.82
   1  27  -8   13.83    2.86
  -1 -27  -8   13.64    4.49
  -1 -27  -8   12.42    2.88
  -1  27   8   12.94    2.78
  -1  27  -8    8.01    3.21
   1  27   8   11.60    4.17
  -1  27  -8   14.44    4.85
   1 -27  -8   10.55    4.95
   1 -27  -8   10.79    2.62
   1  27   8   15.63    3.01
   1  28  -8    9.96    4.91
  -1  28   8    4.76    2.96
   1  28  -8   13.69    4.78
  -1 -28  -8   10.75    4.63
  -1 -28  -8    4.50    3.43
  -1  28   8   11.36    2.92
  -1  28  -8   11.04    3.26
   1  28   8   10.68    4.16
  -1  28  -8   11.12    5.07
   1 -28  -8    6.42    5.06
   1 -28  -8    7.79    1.75
   1  28   8   10.60    2.95
   1  29  -8   -6.32    5.05
  -1  29   8    1.72    2.92
  -1 -29  -8    0.14    3.88
  -1 -29  -8    0.24    1.85
  -1  29   8    1.37    1.78
  -1  29  -8    1.50    3.21
   1  29   8    3.76    4.07
  -1  29  -8    2.34    3.15
   1 -29  -8   -0.78    5.00
   1 -29  -8   -0.32    2.51
   1  29   8    2.57    2.96
   1   0   9    0.52    1.38
  -1   0   9    1.14    2.45
  -1   0  -9    2.24    2.44
   1   0  -9    2.35    2.60
   1   0  -9    0.29    1.31
  -1   0  -9    1.10    2.16
  -1   0   9   -3.53    2.37
   1  -1   9  114.98    2.76
  -1   1   9  112.96    3.96
   1   1  -9  120.11    4.25
  -1  -1  -9  115.89    4.03
   1   1  -9  115.09    2.58
  -1  -1  -9  114.54    3.75
  -1   1   9  114.15    2.86
   1  -1   9  109.34    2.67
  -1  -1   9  115.95    3.98
   1   1   9  117.15    2.74
  -1   1  -9  117.82    3.98
   1  -1  -9  119.35    4.22
   1  -1  -9  112.15    3.77
  -1   1  -9  115.47    2.56
  -1  -1   9  111.18    2.75
   1   1   9  111.21    2.81
   1  -2   9    7.70    1.44
  -1   2   9   10.30    2.49
   1   2  -9    6.83    2.65
  -1  -2  -9    6.00    1.55
   1   2  -9    6.69    1.30
  -1  -2  -9    6.16    1.54
  -1   2   9    2.14    2.48
   1  -2   9    2.23    2.35
  -1  -2   9    5.50    2.45
   1   2   9    7.37    1.44
  -1   2  -9   10.87    2.52
   1  -2  -9    7.26    1.68
   1  -2  -9    4.01    2.42
  -1   2  -9    5.99    1.28
  -1  -2   9    3.10    2.49
   1  -3   9    4.72    1.46
  -1   3   9    2.17    2.54
   1   3  -9    6.10    2.64
  -1  -3  -9    7.00    2.41
   1   3  -9    3.08    1.26
  -1  -3  -9    4.05    2.53
  -1  -3   9    7.01    2.46
  -1   3  -9    7.45    2.52
   1   3   9    5.03    1.41
   1  -3  -9    3.87    1.65
   1  -3  -9    2.46    1.59
  -1  -3   9    5.77    1.55
   1   3   9    6.00    2.77
   1  -4   9   58.28    2.09
   1   4  -9   60.13    2.25
  -1   4   9   59.26    3.26
  -1  -4  -9   59.92    3.16
   1   4  -9   59.55    1.79
  -1  -4  -9   64.74    3.40
  -1   4   9   61.78    2.31
   1  -4   9   66.77    2.90
  -1  -4   9   57.44    3.21
  -1   4  -9   58.20    3.29
   1   4   9   58.65    2.02
   1  -4  -9   56.57    2.29
  -1   4  -9   58.42    1.82
   1  -4  -9   70.81    3.49
  -1  -4   9   69.14    3.29
   1   4   9   69.00    2.35
   1  -5   9   14.80    1.57
   1   5  -9   14.87    1.78
  -1   5   9   13.57    1.68
  -1  -5  -9   17.58    2.59
   1   5  -9   16.17    1.95
  -1  -5  -9   14.61    1.79
  -1   5   9    9.37    2.74
   1  -5   9   11.84    1.24
  -1  -5   9   13.81    2.61
  -1   5  -9   17.12    1.69
   1   5   9   14.91    1.51
   1  -5  -9   15.32    1.77
   1  -5  -9   14.70    1.72
  -1  -5   9   15.36    1.46
   1  -6   9   12.65    1.58
   1   6  -9   13.20    2.75
  -1   6   9   11.29    2.74
  -1  -6  -9    9.87    1.61
   1   6  -9   10.73    1.09
  -1  -6  -9    9.70    1.65
  -1   6   9   11.99    2.55
   1  -6   9   11.44    1.08
  -1  -6   9   10.13    2.56
  -1   6  -9   10.71    2.64
   1   6   9    9.95    2.37
   1  -6  -9   10.02    1.70
  -1   6  -9    8.61    1.05
   1  -6  -9    7.89    2.62
  -1  -6   9    9.95    1.23
   1   6   9    9.15    2.60
   1  -7   9  144.07    4.30
   1   7  -9  142.20    3.50
  -1   7   9  146.01    3.37
  -1  -7  -9  142.53    3.33
   1   7  -9  140.19    3.27
  -1  -7  -9  145.29    4.43
  -1   7   9  139.90    3.20
   1  -7   9  145.39    2.63
  -1  -7   9  146.81    4.28
  -1   7  -9  143.32    3.43
   1   7   9  146.49    4.20
   1  -7  -9  144.42    3.54
  -1   7  -9  147.52    3.20
   1  -7  -9  138.52    4.39
  -1  -7   9  142.48    3.53
   1   7   9  140.04    3.22
   1  -8   9  100.67    2.71
   1   8  -9   95.96    2.85
  -1   8   9  100.69    4.04
  -1  -8  -9   99.00    2.83
   1   8  -9   98.08    2.62
  -1  -8  -9   98.56    3.90
   1  -8   9  102.62    2.58
  -1   8   9   97.25    2.69
  -1  -8   9  100.54    2.61
  -1   8  -9  104.43    4.05
   1   8   9   99.86    2.60
   1  -8  -9   99.24    3.01
  -1   8  -9  100.40    2.46
   1  -8  -9   98.20    2.68
  -1  -8   9  101.26    2.90
   1   8   9   98.02    3.89
   1  -9   9    2.01    1.58
   1   9  -9    4.41    2.69
  -1   9   9    4.03    1.67
  -1  -9  -9    2.79    1.64
   1   9  -9    3.10    0.94
  -1  -9  -9    2.86    2.64
   1  -9   9    3.04    1.38
  -1   9   9    4.46    1.51
  -1  -9   9    3.54    1.56
  -1   9  -9    4.57    2.76
   1   9   9    3.59    1.45
   1  -9  -9    3.79    2.91
  -1   9  -9    2.89    1.26
   1  -9  -9    3.62    1.59
  -1  -9   9    4.62    1.64
   1   9   9    4.55    2.63
   1 -10   9   56.14    3.39
   1  10  -9   56.54    3.51
  -1  10   9   55.71    2.28
  -1 -10  -9   55.07    2.33
   1  10  -9   54.75    1.43
  -1 -10  -9   52.91    3.35
   1 -10   9   54.99    1.87
  -1  10   9   57.07    3.22
  -1 -10   9   56.77    3.26
  -1  10  -9   55.19    3.58
   1  10   9   54.51    3.02
   1 -10  -9   60.81    3.79
  -1  10  -9   56.33    1.74
   1 -10  -9   54.80    2.20
  -1 -10   9   56.96    2.16
   1  10   9   56.64    2.29
   1 -11   9   14.26    1.83
   1  11  -9   10.98    3.09
  -1  11   9   14.86    1.85
  -1 -11  -9   15.47    2.90
   1  11  -9   13.16    1.49
  -1 -11  -9   17.99    3.13
   1 -11   9   17.00    1.49
  -1  11   9   17.36    3.13
  -1 -11   9   14.94    1.82
  -1  11  -9   12.96    3.14
   1  11   9   15.51    2.58
   1 -11  -9   10.89    2.02
  -1  11  -9   13.63    1.24
   1 -11  -9   17.55    1.89
  -1 -11   9   18.07    1.82
   1  11   9   24.16    3.10
   1 -12   9  237.97    5.19
   1  12  -9  249.70    6.95
  -1  12   9  245.59    5.20
  -1 -12  -9  245.39    6.73
   1  12  -9  242.42    4.56
  -1 -12  -9  241.35    6.48
   1 -12   9  252.97    4.26
  -1  12   9  241.05    6.31
  -1 -12   9  236.99    6.41
  -1  12  -9  249.33    7.07
   1  12   9  248.13    6.22
   1 -12  -9  243.54    7.13
  -1  12  -9  239.76    4.16
   1 -12  -9  241.03    4.96
  -1 -12   9  244.36    4.68
   1  12   9  246.28    6.51
   1 -13   9    9.24    3.02
   1  13  -9   12.18    2.06
  -1  13   9    8.25    2.00
  -1 -13  -9   11.41    1.91
   1  13  -9   10.83    1.30
  -1 -13  -9    9.03    2.86
   1 -13   9   10.38    1.11
  -1  13   9    9.87    2.75
  -1 -13   9   12.16    1.87
  -1  13  -9   12.44    2.08
   1  13   9   13.21    2.77
   1 -13  -9   10.58    2.10
  -1  13  -9   10.70    1.05
   1 -13  -9   10.69    1.73
  -1 -13   9   10.16    1.42
   1  13   9    8.54    1.79
   1 -14   9    6.85    1.93
   1  14  -9    5.86    2.08
  -1 -14  -9    8.37    3.01
   1  14  -9    4.22    1.23
   1 -14   9    7.48    1.09
  -1  14   9    6.79    1.81
  -1 -14   9    5.45    1.81
  -1  14  -9    2.06    3.42
   1  14   9    6.10    2.72
   1 -14  -9   10.10    3.48
  -1  14  -9    4.76    1.24
   1 -14  -9    1.15    2.05
  -1 -14   9    4.93    1.43
   1  14   9    5.70    1.76
   1 -15   9    2.33    1.94
   1  15  -9    4.44    3.31
  -1  15   9    2.68    1.93
  -1 -15  -9    2.37    1.87
   1  15  -9    0.62    1.12
   1 -15   9   -1.08    1.15
  -1  15   9    0.01    1.77
  -1 -15   9    1.01    3.04
  -1  15  -9   -0.19    2.14
   1  15   9    1.07    2.81
   1 -15  -9    1.41    2.08
  -1  15  -9    0.13    0.78
  -1 -15   9   -1.11    1.28
   1  15   9   -0.85    2.83
   1 -16   9   67.87    2.89
   1  16  -9   65.59    3.07
  -1  16   9   70.22    2.95
  -1 -16  -9   65.36    4.17
   1  16  -9   66.27    1.85
  -1 -16  -9   60.76    4.13
   1 -16   9   69.27    1.55
  -1  16   9   68.49    2.56
  -1 -16   9   65.58    2.82
  -1  16  -9   65.22    4.65
   1  16   9   68.93    2.59
   1 -16  -9   69.18    3.12
  -1  16  -9   71.15    1.47
   1 -16  -9   57.24    4.12
  -1 -16   9   71.29    2.07
   1  16   9   68.33    3.78
   1 -17   9   -2.04    2.09
   1  17  -9    1.45    3.57
  -1  17   9   -0.33    3.32
  -1 -17  -9    1.16    3.25
   1  17  -9    1.49    0.98
  -1 -17  -9   -7.44    3.34
  -1  17   9    0.55    1.82
   1 -17   9   -0.40    0.83
  -1 -17   9    0.63    1.99
  -1  17  -9    2.25    2.31
   1  17   9    4.84    2.97
   1 -17  -9   -0.62    3.53
   1 -17  -9   -6.62    3.04
   1  17   9    3.02    2.81
   1  18  -9   -1.82    2.27
  -1  18   9    2.26    3.47
  -1 -18  -9    4.75    2.04
   1  18  -9    1.66    0.88
  -1 -18  -9    0.17    1.83
  -1  18   9    1.87    1.66
   1 -18   9   -0.01    0.55
  -1 -18   9    0.37    2.03
  -1  18  -9    2.35    3.87
   1  18   9   -1.04    1.93
   1 -18  -9    3.30    3.68
  -1  18  -9    0.63    0.50
   1 -18  -9   -2.23    1.84
  -1 -18   9   -0.34    1.02
   1  18   9    1.79    1.75
   1  19  -9   -1.40    2.42
  -1  19   9    3.61    2.13
  -1 -19  -9    1.03    2.14
   1  19  -9    1.97    0.79
  -1  19   9    2.89    1.68
  -1 -19   9    1.07    2.08
  -1  19  -9   -0.65    2.46
   1  19   9   -0.29    3.13
   1 -19  -9   -1.68    3.75
  -1  19  -9    3.32    2.35
   1 -19  -9    7.04    3.68
  -1 -19   9    1.44    1.03
   1  19   9    0.85    1.75
   1  20  -9    2.66    3.93
  -1  20   9    8.92    3.68
  -1 -20  -9    5.59    3.62
   1  20  -9    4.64    2.24
  -1 -20  -9    5.82    2.01
  -1  20   9    3.52    1.69
  -1  20  -9    0.68    2.58
   1  20   9    2.68    3.15
   1 -20  -9    0.60    2.57
  -1  20  -9    2.32    2.51
   1 -20  -9   12.79    3.32
  -1 -20   9    3.41    0.80
   1  20   9    3.97    1.77
  -1 -20   9    3.08    0.67
   1  21  -9    8.09    4.21
  -1  21   9   12.72    3.73
  -1 -21  -9   11.54    3.85
   1  21  -9    8.55    2.39
  -1 -21  -9    4.14    3.25
  -1  21   9    7.51    1.75
  -1  21  -9    8.14    2.74
   1  21   9    6.84    2.11
   1 -21  -9    7.92    2.57
  -1  21  -9    9.35    2.64
   1 -21  -9    7.52    1.82
  -1 -21   9    6.73    0.84
   1  21   9   10.03    2.95
  -1 -21   9    7.29    0.59
   1  22  -9    5.88    2.73
  -1  22   9    4.58    2.42
  -1 -22  -9    5.19    3.94
   1  22  -9    8.50    2.50
  -1 -22  -9    8.50    1.92
  -1  22   9    7.93    1.74
  -1  22  -9    4.40    4.41
   1  22   9    7.43    3.52
   1 -22  -9    7.18    2.68
  -1  22  -9    9.24    2.73
   1 -22  -9    8.07    2.75
   1  22   9    6.44    2.98
   1  23  -9    3.20    2.75
  -1  23   9    2.72    2.47
  -1 -23  -9    3.65    3.97
   1  23  -9    9.13    2.45
  -1 -23  -9    3.27    3.10
  -1  23   9    4.63    1.77
  -1  23  -9    6.40    4.58
   1  23   9    7.29    3.51
   1 -23  -9    2.38    2.73
  -1  23  -9    6.78    2.71
   1 -23  -9    6.48    1.75
   1  23   9    6.80    2.95
   1  24  -9   13.17    2.96
  -1  24   9   12.72    4.02
  -1 -24  -9   12.77    4.17
   1  24  -9    8.42    2.60
  -1 -24  -9   12.04    2.19
  -1  24   9   10.76    1.84
  -1  24  -9   10.98    4.75
   1  24   9   13.45    3.74
   1 -24  -9   13.33    2.88
  -1  24  -9    9.44    2.89
   1 -24  -9   17.72    3.20
   1  24   9   10.38    3.09
   1  25  -9    4.27    4.61
  -1  25   9    2.88    3.94
  -1 -25  -9   -1.51    4.09
   1  25  -9   -0.43    2.54
  -1 -25  -9    2.29    2.90
  -1  25   9    1.01    2.70
  -1  25  -9   -0.31    4.73
   1  25   9    0.51    3.61
   1 -25  -9   -0.43    2.83
  -1  25  -9   -0.41    2.78
   1 -25  -9    0.21    1.61
   1  25   9    2.99    2.96
   1  26  -9    3.62    4.72
  -1  26   9    3.50    4.21
  -1 -26  -9    1.61    4.30
   1  26  -9    3.50    2.63
  -1 -26  -9    3.05    2.96
  -1  26   9    2.49    2.79
  -1  26  -9    0.11    4.62
   1  26   9    1.37    2.37
   1 -26  -9    1.53    2.97
  -1  26  -9    3.46    4.74
   1 -26  -9   -0.37    2.60
   1  26   9    2.23    3.04
   1  27  -9    4.37    5.11
  -1  27   9    2.82    4.40
  -1 -27  -9    8.51    4.56
   1  27  -9    7.57    2.93
  -1  27   9    3.42    2.92
  -1  27  -9    2.50    5.23
   1  27   9    6.56    2.56
  -1  27  -9   11.91    5.01
   1 -27  -9    4.81    5.01
   1 -27  -9   13.07    3.09
   1  27   9    6.54    3.31
   1  28  -9   37.74    6.00
  -1  28   9   35.23    5.23
   1  28  -9   38.68    5.49
  -1 -28  -9   34.80    5.39
  -1 -28  -9   44.70    4.22
  -1  28   9   36.62    3.60
  -1  28  -9   31.06    6.04
   1  28   9   35.27    3.12
  -1  28  -9   39.01    5.72
   1 -28  -9   37.81    5.60
   1 -28  -9   38.47    2.37
   1  28   9   37.26    3.84
   1  29  -9    3.50    3.32
  -1  29   9    4.55    4.82
   1  29  -9   12.48    5.05
  -1 -29  -9    5.40    3.00
  -1 -29  -9   -0.18    3.15
  -1  29   9    3.34    2.99
  -1  29  -9    0.68    5.42
   1  29   9   -0.71    4.31
  -1  29  -9    2.88    3.31
   1 -29  -9    5.42    5.14
   1 -29  -9    2.91    2.85
   1  29   9    6.44    3.34
   1   0  10   41.17    2.90
  -1   0  10   41.10    1.99
  -1   0 -10   39.77    3.05
   1   0 -10   38.48    2.11
   1   0 -10   38.00    2.70
  -1   0 -10   38.76    2.77
  -1   0  10   37.07    2.91
   1   0  10   39.07    2.78
   1  -1  10   65.12    3.22
  -1   1  10   66.24    3.37
   1   1 -10   65.88    3.56
  -1  -1 -10   68.58    3.44
   1   1 -10   66.96    2.10
  -1  -1 -10   66.16    2.16
  -1   1  10   67.07    2.20
   1  -1  10   66.25    3.00
  -1  -1  10   65.10    2.26
   1   1  10   71.63    3.19
  -1   1 -10   62.82    3.35
   1  -1 -10   67.93    2.50
   1  -1 -10   65.86    3.20
  -1   1 -10   65.25    2.05
  -1  -1  10   66.93    2.19
   1   1  10   63.80    2.15
   1  -2  10  178.15    3.74
  -1   2  10  174.66    4.97
   1   2 -10  178.81    5.30
  -1  -2 -10  177.94    5.16
   1   2 -10  173.73    3.41
  -1  -2 -10  180.58    3.78
  -1   2  10  176.63    4.90
   1  -2  10  175.93    3.49
  -1  -2  10  176.14    3.80
   1   2  10  177.49    3.67
  -1   2 -10  184.32    5.24
   1  -2 -10  173.85    4.03
   1  -2 -10  176.21    3.63
  -1   2 -10  176.32    3.42
  -1  -2  10  174.02    4.57
   1   2  10  172.86    4.80
   1  -3  10   28.37    1.75
  -1   3  10   28.57    1.81
   1   3 -10   28.75    1.98
  -1  -3 -10   26.31    2.90
   1   3 -10   26.93    1.52
  -1  -3 -10   28.24    1.78
  -1   3  10   26.73    1.85
   1  -3  10   28.45    1.52
  -1  -3  10   28.41    2.82
   1   3  10   29.55    1.69
  -1   3 -10   28.32    1.91
   1  -3 -10   25.82    2.02
   1  -3 -10   29.52    2.76
  -1   3 -10   27.74    1.46
  -1  -3  10   27.26    1.61
   1   3  10   28.87    1.75
   1  -4  10   43.31    1.93
   1   4 -10   45.58    2.15
  -1   4  10   43.15    2.04
  -1  -4 -10   48.16    3.06
   1   4 -10   44.51    1.60
  -1  -4 -10   45.37    3.06
  -1   4  10   42.07    3.07
   1  -4  10   45.77    2.43
  -1  -4  10   46.14    3.01
  -1   4 -10   43.69    2.14
   1   4  10   43.32    1.93
   1  -4 -10   43.11    3.37
  -1   4 -10   42.83    1.58
   1  -4 -10   43.96    2.03
  -1  -4  10   43.31    2.54
   1   4  10   44.45    3.04
   1  -5  10    1.56    2.56
   1   5 -10    3.91    2.74
  -1   5  10    0.21    2.54
  -1  -5 -10    6.47    2.55
   1   5 -10    5.69    1.85
  -1  -5 -10    2.71    1.67
  -1   5  10    3.30    2.52
   1  -5  10    4.93    1.87
  -1  -5  10    3.70    2.50
  -1   5 -10    5.47    2.71
   1   5  10    4.05    2.36
   1  -5 -10    7.90    2.78
  -1   5 -10    4.91    1.07
   1  -5 -10    1.03    2.55
  -1  -5  10    2.42    2.11
   1   5  10    5.02    1.65
   1  -6  10  212.55    4.36
   1   6 -10  209.52    4.73
  -1   6  10  211.77    4.46
  -1  -6 -10  215.13    5.92
   1   6 -10  211.45    4.58
  -1  -6 -10  214.10    4.49
  -1   6  10  208.47    4.40
   1  -6  10  211.86    4.53
  -1  -6  10  208.81    4.36
  -1   6 -10  212.48    4.67
   1   6  10  208.86    4.21
   1  -6 -10  209.05    6.14
  -1   6 -10  214.11    4.43
   1  -6 -10  211.42    5.71
  -1  -6  10  216.92    4.95
   1   6  10  209.52    5.73
   1  -7  10    5.94    1.62
   1   7 -10    4.33    1.83
  -1   7  10    2.97    2.74
  -1  -7 -10    3.26    2.62
   1   7 -10    4.83    1.09
  -1  -7 -10    2.92    2.84
  -1   7  10    5.11    2.67
   1  -7  10    5.52    1.72
  -1  -7  10    5.29    1.63
  -1   7 -10    6.02    1.74
   1   7  10    6.98    2.40
   1  -7 -10    2.64    2.88
  -1   7 -10    4.46    1.55
   1  -7 -10    3.96    1.65
  -1  -7  10    4.53    1.22
   1   7  10    4.36    1.67
   1  -8  10   41.84    3.19
   1   8 -10   39.64    3.47
  -1   8  10   43.38    3.32
  -1  -8 -10   42.05    3.24
   1   8 -10   41.27    2.07
  -1  -8 -10   42.28    3.35
  -1   8  10   38.36    3.25
   1  -8  10   40.72    2.09
  -1  -8  10   41.50    3.11
  -1   8 -10   40.57    3.41
   1   8  10   41.26    1.89
   1  -8 -10   39.59    2.33
  -1   8 -10   42.89    1.90
   1  -8 -10   40.89    2.13
  -1  -8  10   39.86    1.62
   1   8  10   40.34    3.37
   1  -9  10   14.54    1.84
   1   9 -10   15.31    3.08
  -1   9  10   15.59    1.92
  -1  -9 -10   14.04    1.89
   1   9 -10   15.88    1.76
   1  -9  10   19.25    1.85
  -1   9  10   20.72    2.06
  -1  -9  10   15.58    1.82
  -1   9 -10   13.37    3.16
   1   9  10   15.46    2.68
   1  -9 -10   14.30    3.18
  -1   9 -10   14.40    1.00
  -1  -9  10   17.21    1.36
   1 -10  10    3.04    2.80
   1  10 -10   -0.35    2.95
  -1  10  10    1.87    1.78
  -1 -10 -10    3.34    1.74
   1  10 -10    1.46    0.93
  -1 -10 -10   -3.71    3.00
   1 -10  10   -1.11    1.46
  -1  10  10   -3.13    1.77
  -1 -10  10    0.61    2.74
  -1  10 -10    3.58    3.03
   1  10  10    0.03    2.36
   1 -10 -10    1.82    3.17
  -1  10 -10    1.85    1.32
   1 -10 -10   -0.54    2.81
  -1 -10  10    0.21    1.05
   1  10  10   -1.53    1.77
   1 -11  10   98.74    2.98
   1  11 -10   98.45    4.55
  -1  11  10  100.62    3.06
  -1 -11 -10   97.59    4.37
   1  11 -10   94.27    1.99
  -1 -11 -10   95.71    4.39
   1 -11  10  102.69    2.49
  -1  11  10  100.15    4.17
  -1 -11  10   98.84    2.99
  -1  11 -10  100.47    4.68
   1  11  10  100.77    4.03
   1 -11 -10   99.37    3.25
  -1  11 -10   93.83    1.84
   1 -11 -10   98.40    4.26
  -1 -11  10   96.97    2.13
   1  11  10   99.34    4.29
   1 -12  10    7.92    1.94
   1  12 -10   10.95    3.32
  -1  12  10   11.76    1.89
  -1 -12 -10   12.79    1.96
   1  12 -10    9.09    0.96
  -1 -12 -10    5.30    3.25
   1 -12  10    7.79    1.43
  -1  12  10    6.47    2.97
  -1 -12  10    8.23    3.05
  -1  12 -10   11.78    3.44
   1  12  10    8.56    2.77
   1 -12 -10   10.80    3.51
  -1  12 -10    9.70    1.27
   1 -12 -10    1.98    3.16
  -1 -12  10    7.01    1.71
   1  12  10    8.81    1.97
   1 -13  10    5.46    3.12
   1  13 -10    0.93    3.38
  -1  13  10    2.10    3.08
  -1 -13 -10    4.59    1.91
   1  13 -10    0.11    1.39
   1 -13  10    4.47    1.39
  -1 -13  10    3.70    1.83
  -1  13 -10    5.14    2.13
   1  13  10    0.98    2.82
   1 -13 -10    1.28    2.09
  -1  13 -10    1.06    1.13
  -1 -13  10    6.67    1.71
   1  13  10    4.08    1.96
   1 -14  10    8.08    2.07
   1  14 -10    8.17    2.24
  -1  14  10   11.12    3.26
  -1 -14 -10    4.49    3.30
   1  14 -10    7.37    1.40
  -1 -14 -10    7.47    2.06
   1 -14  10    9.61    1.22
  -1  14  10    6.79    1.92
  -1 -14  10    8.13    3.27
  -1  14 -10   11.18    2.36
   1  14  10    5.97    2.90
   1 -14 -10    7.39    3.59
  -1  14 -10    9.73    1.14
   1 -14 -10    4.02    3.13
  -1 -14  10    8.75    1.46
   1  14  10   10.70    3.12
   1 -15  10    1.80    2.01
   1  15 -10    5.54    3.48
  -1  15  10    1.49    1.99
  -1 -15 -10    1.70    3.27
   1  15 -10    0.43    1.23
  -1 -15 -10    2.84    2.28
  -1  15  10    2.12    2.06
  -1 -15  10    0.89    3.21
  -1  15 -10    3.64    3.62
   1  15  10    0.56    1.75
   1 -15 -10    1.93    3.53
  -1  15 -10    0.54    1.29
   1 -15 -10    8.32    3.64
   1  15  10    0.72    3.20
   1 -16  10    1.43    2.06
   1  16 -10    2.55    2.28
  -1  16  10    1.25    2.13
  -1 -16 -10    3.09    2.08
   1  16 -10    2.91    1.18
   1 -16  10    1.56    0.99
  -1  16  10   -0.37    1.89
  -1 -16  10    1.18    2.06
  -1  16 -10    3.91    2.34
   1  16  10    4.10    1.83
   1 -16 -10    2.60    2.23
  -1  16 -10    3.31    0.91
   1 -16 -10   -2.85    1.95
  -1 -16  10    0.06    1.47
   1  16  10    2.44    1.88
   1 -17  10   -3.98    2.09
   1  17 -10   -0.92    3.69
  -1  17  10    3.59    3.48
  -1 -17 -10    3.64    3.33
   1  17 -10    0.84    1.11
  -1 -17 -10   -6.44    3.32
   1 -17  10    0.19    0.84
  -1  17  10    2.97    2.92
  -1 -17  10    2.40    2.07
  -1  17 -10    4.50    3.77
   1  17  10    2.45    2.98
   1 -17 -10    0.96    2.29
  -1  17 -10    1.70    1.07
  -1 -17  10   -2.38    1.27
   1  17  10   -1.65    1.88
   1 -18  10   -2.16    3.56
   1  18 -10   -0.47    2.42
  -1  18  10    1.52    2.10
  -1 -18 -10    0.02    3.29
   1  18 -10   -0.13    1.36
  -1 -18 -10    0.76    2.31
  -1  18  10    0.80    3.07
   1 -18  10   -0.20    0.66
  -1 -18  10   -1.07    2.13
  -1  18 -10    2.75    3.93
   1  18  10    0.31    1.90
   1 -18 -10    2.21    3.78
  -1  18 -10   -0.61    0.85
   1 -18 -10   -3.76    3.87
  -1 -18  10   -2.53    1.30
   1  18  10    0.20    3.09
   1  19 -10   10.61    4.06
  -1  19  10    8.58    2.24
  -1 -19 -10    7.25    2.39
   1  19 -10    6.11    1.02
  -1 -19 -10   14.97    3.72
  -1  19  10    5.79    3.03
  -1 -19  10    5.05    2.27
  -1  19 -10    7.61    2.66
   1  19  10    7.58    3.26
   1 -19 -10    6.90    4.05
   1 -19 -10    9.35    3.69
  -1 -19  10    7.85    1.16
   1  19  10    7.95    3.15
   1  20 -10   -1.74    2.56
  -1  20  10    1.75    3.77
  -1 -20 -10   -0.05    2.29
   1  20 -10   -0.33    0.82
  -1 -20 -10   -2.71    3.35
  -1  20  10    0.98    2.96
  -1  20 -10    2.14    4.27
   1  20  10    2.21    2.01
   1 -20 -10    1.75    4.03
  -1  20 -10    2.22    2.44
   1 -20 -10    2.24    1.95
  -1 -20  10   -0.64    0.90
   1  20  10    1.52    3.04
   1  21 -10   14.95    2.82
  -1  21  10   13.73    2.55
  -1 -21 -10   16.13    4.00
   1  21 -10    9.23    2.63
  -1 -21 -10   12.77    2.11
  -1  21  10   13.08    3.07
  -1  21 -10   14.71    4.68
   1  21  10   14.52    2.24
   1 -21 -10   16.79    2.72
  -1  21 -10   17.84    2.78
   1 -21 -10   15.05    3.15
  -1 -21  10   12.16    1.06
   1  21  10   12.57    2.05
   1  22 -10   -0.21    4.34
  -1  22  10    2.23    2.47
  -1 -22 -10   -0.69    3.96
  -1 -22 -10    2.55    3.21
  -1  22  10    4.56    2.99
  -1  22 -10    0.26    4.53
   1  22  10    3.83    3.48
   1 -22 -10    3.66    2.65
  -1  22 -10    3.58    2.65
   1 -22 -10    3.73    1.80
  -1 -22  10    1.32    0.66
   1  22  10   -0.52    1.90
  -1 -22  10    1.04    0.47
   1  23 -10    4.38    4.50
  -1  23  10   -0.13    3.99
  -1 -23 -10   -1.49    4.13
   1  23 -10    4.26    2.54
  -1 -23 -10    4.10    2.23
  -1  23  10    6.58    2.99
  -1  23 -10    6.69    2.92
   1  23  10    2.04    3.67
   1 -23 -10   -1.34    2.75
  -1  23 -10    6.46    2.73
   1 -23 -10    5.73    3.29
   1  23  10    3.07    1.95
   1  24 -10    1.97    4.72
  -1  24  10    2.23    4.12
  -1 -24 -10    2.47    4.16
   1  24 -10   -0.66    2.61
  -1 -24 -10    3.40    3.30
  -1  24  10    4.39    2.97
  -1  24 -10    2.06    2.96
   1  24  10    1.87    2.29
   1 -24 -10    3.46    2.81
  -1  24 -10    4.11    2.85
   1 -24 -10    3.66    2.93
   1  24  10    4.06    3.14
   1  25 -10    7.42    4.89
  -1  25  10   12.40    4.34
  -1 -25 -10   14.05    4.53
   1  25 -10    7.19    2.81
  -1 -25 -10    9.24    2.08
  -1  25  10    8.12    3.15
  -1  25 -10    8.36    3.20
   1  25  10   10.09    2.48
   1 -25 -10   10.72    3.09
  -1  25 -10    5.75    3.10
   1 -25 -10    6.89    3.00
   1  25  10    8.86    3.40
   1  26 -10    4.44    3.14
  -1  26  10    4.92    4.47
  -1 -26 -10    2.59    4.47
   1  26 -10    2.12    2.74
  -1 -26 -10    7.88    4.01
  -1  26  10    6.79    3.12
  -1  26 -10    7.69    3.31
   1  26  10    4.02    2.51
   1 -26 -10    6.20    3.13
  -1  26 -10    7.67    4.89
   1 -26 -10    4.54    2.08
   1  26  10    5.49    3.33
   1  27 -10   14.61    3.52
  -1  27  10   16.22    5.05
  -1 -27 -10   22.63    5.08
   1  27 -10   18.03    3.23
  -1 -27 -10   23.89    4.24
  -1  27  10   19.02    3.57
  -1  27 -10   16.33    3.59
   1  27  10   19.06    2.78
   1 -27 -10   19.93    5.51
  -1  27 -10   11.86    5.36
   1 -27 -10   23.03    3.75
   1  27  10   17.29    3.64
   1  28 -10    1.05    3.35
  -1  28  10    1.84    4.73
   1  28 -10   -5.93    3.08
  -1 -28 -10    2.47    4.63
  -1 -28 -10   -0.44    2.03
  -1  28  10    3.14    3.21
  -1  28 -10   -1.88    3.45
   1  28  10    0.71    2.65
  -1  28 -10    4.81    4.99
   1 -28 -10    1.12    5.15
   1 -28 -10   -0.57    1.82
   1  28  10    5.65    3.44
   1   0  11   -1.09    1.47
  -1   0  11    0.65    1.62
  -1   0 -11    1.14    1.67
   1   0 -11    2.44    2.91
   1   0 -11    4.09    1.44
  -1   0 -11    2.54    2.34
  -1   0  11   -1.14    2.43
   1   0  11    1.39    1.47
   1  -1  11   38.93    2.99
  -1   1  11   39.47    2.06
   1   1 -11   37.72    2.26
  -1  -1 -11   38.75    2.12
   1   1 -11   40.01    2.75
  -1  -1 -11   36.10    2.95
  -1   1  11   41.81    1.99
   1  -1  11   37.84    1.86
  -1  -1  11   40.73    3.15
   1   1  11   40.34    2.88
  -1   1 -11   38.09    3.16
   1  -1 -11   42.07    3.48
   1  -1 -11   39.88    1.94
  -1   1 -11   39.93    1.81
  -1  -1  11   37.29    1.96
   1   1  11   38.60    3.03
   1  -2  11   94.98    3.79
  -1   2  11   95.72    3.89
   1   2 -11   93.89    4.17
  -1  -2 -11   96.79    4.02
   1   2 -11   94.89    3.39
  -1  -2 -11   93.87    2.67
  -1   2  11   95.89    3.90
   1  -2  11   92.02    3.50
  -1  -2  11   93.68    2.74
   1   2  11   96.13    3.66
  -1   2 -11   88.16    4.03
   1  -2 -11   93.36    2.97
   1  -2 -11   94.05    3.72
  -1   2 -11   95.37    3.40
  -1  -2  11   92.95    3.57
   1   2  11   95.89    3.88
   1  -3  11   35.32    1.94
  -1   3  11   35.07    2.07
   1   3 -11   34.95    2.15
  -1  -3 -11   32.78    3.13
   1   3 -11   34.61    1.65
  -1  -3 -11   33.08    2.00
  -1   3  11   36.56    1.99
   1  -3  11   31.81    2.64
  -1  -3  11   33.68    1.97
   1   3  11   38.26    1.91
  -1   3 -11   36.87    2.17
   1  -3 -11   34.63    2.23
   1  -3 -11   32.55    1.97
  -1   3 -11   35.98    2.50
  -1  -3  11   33.95    1.80
   1   3  11   34.86    2.06
   1  -4  11  154.18    4.76
  -1   4  11  149.45    4.82
   1   4 -11  155.37    5.35
  -1  -4 -11  150.63    4.96
   1   4 -11  152.78    3.12
  -1  -4 -11  158.28    4.87
  -1   4  11  145.31    4.81
   1  -4  11  151.65    3.23
  -1  -4  11  154.06    4.85
   1   4  11  152.18    4.49
  -1   4 -11  159.42    5.11
   1  -4 -11  153.51    5.23
  -1   4 -11  156.96    4.03
   1  -4 -11  153.05    4.80
  -1  -4  11  151.15    3.35
   1   4  11  150.21    4.90
   1  -5  11  137.17    4.57
   1   5 -11  129.46    3.59
  -1   5  11  138.81    3.42
  -1  -5 -11  134.28    3.53
   1   5 -11  136.02    3.79
  -1  -5 -11  133.25    3.46
  -1   5  11  128.83    3.51
   1  -5  11  134.56    3.04
  -1  -5  11  134.39    3.38
  -1   5 -11  132.05    3.56
   1   5  11  133.44    3.18
   1  -5 -11  131.08    4.95
  -1   5 -11  136.60    3.67
   1  -5 -11  133.27    3.43
  -1  -5  11  130.95    4.19
   1   5  11  127.79    3.58
   1  -6  11  272.58    5.54
   1   6 -11  263.98    7.47
  -1   6  11  276.25    7.15
  -1  -6 -11  275.36    5.95
   1   6 -11  266.74    5.92
  -1  -6 -11  277.75    5.91
  -1   6  11  286.05    7.57
   1  -6  11  274.81    5.24
  -1  -6  11  273.33    5.62
  -1   6 -11  269.88    7.46
   1   6  11  274.73    6.68
   1  -6 -11  268.99    6.06
  -1   6 -11  273.88    5.80
   1  -6 -11  274.43    5.77
  -1  -6  11  270.49    6.53
   1   6  11  289.02    7.59
   1  -7  11    1.76    2.73
   1   7 -11    1.70    1.88
  -1   7  11    1.23    2.87
  -1  -7 -11    0.72    1.75
   1   7 -11    2.08    1.95
  -1  -7 -11    3.60    3.18
  -1   7  11   -2.35    2.01
   1  -7  11   -0.08    1.24
  -1  -7  11    2.35    2.84
  -1   7 -11    2.75    3.02
   1   7  11    0.84    1.57
   1  -7 -11    3.93    1.84
  -1   7 -11    1.17    1.09
   1  -7 -11    1.63    3.04
  -1  -7  11   -0.12    2.28
   1  -8  11  103.38    3.02
   1   8 -11  102.65    3.23
  -1   8  11   99.58    3.06
  -1  -8 -11  103.68    4.49
   1   8 -11  101.18    2.28
  -1  -8 -11  103.14    4.50
  -1   8  11   97.40    3.04
   1  -8  11  104.23    3.08
  -1  -8  11  100.35    3.00
  -1   8 -11  103.49    3.27
   1   8  11   99.96    3.93
   1  -8 -11  104.99    4.67
  -1   8 -11   98.33    2.82
   1  -8 -11  105.95    4.53
  -1  -8  11   99.12    3.30
   1   8  11  100.14    4.33
   1  -9  11    0.37    2.88
   1   9 -11   -0.18    1.94
  -1   9  11    0.32    1.79
  -1  -9 -11    1.46    2.95
   1   9 -11    2.56    1.71
  -1  -9 -11    0.09    3.04
  -1   9  11   -0.07    2.98
   1  -9  11   -0.58    1.74
  -1  -9  11    1.68    2.88
  -1   9 -11    3.03    2.02
   1   9  11    0.14    2.55
   1  -9 -11    2.81    1.96
  -1   9 -11    1.18    0.95
   1  -9 -11    1.41    1.90
  -1  -9  11   -0.96    1.94
   1   9  11    1.22    1.91
   1 -10  11   72.55    2.69
   1  10 -11   73.54    2.96
  -1  10  11   72.06    2.73
  -1 -10 -11   74.06    2.85
   1  10 -11   71.78    2.59
  -1 -10 -11   77.47    4.37
   1 -10  11   73.63    2.63
  -1  10  11   76.00    2.80
  -1 -10  11   70.93    2.72
  -1  10 -11   73.48    3.10
   1  10  11   77.23    3.81
   1 -10 -11   79.26    4.58
  -1  10 -11   73.71    2.33
   1 -10 -11   66.58    2.87
  -1 -10  11   69.92    2.83
   1  10  11   71.67    2.85
   1 -11  11  246.98    5.45
   1  11 -11  239.03    5.82
  -1  11  11  241.61    5.41
  -1 -11 -11  252.12    7.52
   1  11 -11  235.27    4.27
  -1 -11 -11  258.96    8.50
   1 -11  11  250.42    5.25
  -1  11  11  250.12    5.86
  -1 -11  11  252.32    6.97
  -1  11 -11  246.42    5.95
   1  11  11  249.88    6.81
   1 -11 -11  244.75    5.99
  -1  11 -11  242.46    4.82
  -1 -11  11  245.18    5.60
   1  11  11  251.70    7.45
   1 -12  11   -1.17    3.12
   1  12 -11    0.12    2.19
  -1  12  11    0.16    2.08
  -1 -12 -11    2.78    3.26
   1  12 -11   -0.23    1.58
   1 -12  11    0.53    1.50
  -1 -12  11    1.90    1.88
  -1  12 -11   -6.82    3.60
   1  12  11    2.93    2.99
   1 -12 -11    1.23    3.52
  -1 -12  11    0.43    1.77
   1  12  11    1.82    1.98
   1 -13  11    2.63    3.16
   1  13 -11   -0.08    3.59
  -1  13  11   -1.14    1.99
  -1 -13 -11    0.20    2.03
   1  13 -11   -0.21    1.53
  -1 -13 -11   -7.07    3.60
  -1  13  11   -7.55    3.33
  -1 -13  11   -0.39    1.97
  -1  13 -11    0.04    3.65
   1  13  11    1.18    2.90
   1 -13 -11    0.43    2.23
  -1 -13  11   -2.36    1.14
   1  13  11   -8.28    3.49
   1 -14  11  108.65    3.56
   1  14 -11  110.23    5.48
  -1  14  11  116.07    5.09
  -1 -14 -11  108.31    5.19
   1  14 -11  107.90    2.23
  -1 -14 -11  122.15    4.11
   1 -14  11  110.61    2.81
  -1  14  11  114.61    3.80
  -1 -14  11  118.39    5.01
  -1  14 -11  109.49    3.93
   1  14  11  109.05    4.60
   1 -14 -11  111.45    5.46
  -1  14 -11  109.61    2.59
   1 -14 -11  117.70    3.96
  -1 -14  11  119.88    3.41
   1  14  11  112.58    5.37
   1 -15  11   17.79    2.33
   1  15 -11   17.64    2.51
  -1  15  11   19.86    3.66
  -1 -15 -11   21.50    3.70
   1  15 -11   15.92    1.57
  -1 -15 -11   17.43    2.31
   1 -15  11   18.39    1.40
  -1  15  11   19.96    2.20
  -1 -15  11   16.44    3.67
  -1  15 -11   25.10    4.12
   1  15  11   17.36    2.03
   1 -15 -11   17.52    3.99
  -1  15 -11   15.87    1.31
   1 -15 -11   18.48    3.57
  -1 -15  11   17.11    1.66
   1  15  11   18.45    2.23
   1 -16  11    0.42    2.23
   1  16 -11    4.24    3.96
  -1  16  11    8.34    2.15
  -1 -16 -11    3.76    2.21
   1  16 -11    5.08    1.33
  -1 -16 -11    0.01    2.72
   1 -16  11    5.54    1.22
  -1  16  11    3.33    2.11
  -1 -16  11    6.30    2.15
  -1  16 -11    3.61    2.54
   1  16  11    3.29    1.93
   1 -16 -11    2.67    2.45
  -1  16 -11    3.70    1.08
   1 -16 -11   13.14    4.14
  -1 -16  11    6.18    1.70
   1  16  11    1.32    3.42
   1 -17  11   -0.12    3.72
   1  17 -11    1.74    2.46
  -1  17  11    2.22    3.46
  -1 -17 -11    3.36    3.52
   1  17 -11    2.02    1.24
   1 -17  11    0.78    1.06
  -1  17  11   -1.94    3.35
  -1 -17  11   -2.08    2.23
  -1  17 -11    4.08    4.15
   1  17  11    3.66    3.12
   1 -17 -11    4.42    2.48
  -1  17 -11    1.19    0.92
  -1 -17  11    0.23    1.42
   1  17  11    1.10    3.23
   1 -18  11   60.30    4.89
   1  18 -11   60.64    5.23
  -1  18  11   57.57    3.11
  -1 -18 -11   57.87    4.72
  -1 -18 -11   60.14    4.64
  -1  18  11   58.40    4.24
   1 -18  11   59.81    1.53
  -1 -18  11   59.16    3.01
  -1  18 -11   61.04    3.48
   1  18  11   56.62    2.68
   1 -18 -11   62.95    5.07
   1 -18 -11   63.40    3.12
  -1 -18  11   63.58    2.14
   1  18  11   64.27    4.26
   1 -19  11  189.87    7.08
   1  19 -11  180.17    5.56
  -1  19  11  182.61    6.79
  -1 -19 -11  174.73    5.26
  -1 -19 -11  178.16    4.76
  -1  19  11  187.10    6.22
  -1 -19  11  188.90    6.93
  -1  19 -11  189.32    7.86
   1  19  11  190.58    6.22
   1 -19 -11  181.49    7.42
  -1  19 -11  173.60    2.64
   1 -19 -11  177.73    6.10
   1  19  11  182.14    4.77
   1  20 -11   13.80    4.63
  -1  20  11   12.32    2.52
  -1 -20 -11   15.61    2.61
  -1 -20 -11   12.35    3.62
  -1  20  11   14.59    3.33
  -1 -20  11   18.05    4.16
  -1  20 -11   19.46    4.72
   1  20  11   13.32    2.26
   1 -20 -11   14.05    4.46
   1 -20 -11   10.95    3.40
  -1 -20  11   13.37    1.58
   1  20  11   14.23    3.44
   1  21 -11    0.94    4.51
  -1  21  11    1.02    2.36
  -1 -21 -11    2.60    3.89
  -1 -21 -11    3.79    3.47
  -1  21  11    2.47    1.92
  -1  21 -11    2.89    2.84
   1  21  11   -0.16    3.32
   1 -21 -11    0.39    2.60
  -1  21 -11   -1.81    4.15
   1 -21 -11    0.32    1.95
  -1 -21  11    0.15    1.15
   1  21  11    0.10    3.25
   1  22 -11    5.43    2.92
  -1  22  11    8.31    4.02
  -1 -22 -11    1.30    4.18
   1  22 -11    1.16    4.16
  -1 -22 -11   10.86    3.97
  -1  22  11    5.57    2.11
  -1  22 -11   10.52    3.03
   1  22  11    5.25    3.67
   1 -22 -11    6.76    2.81
  -1  22 -11    8.39    4.46
   1 -22 -11   13.63    3.70
   1  22  11    6.97    3.32
   1  23 -11    8.11    3.09
  -1  23  11   12.94    4.22
  -1 -23 -11    9.39    4.40
   1  23 -11   10.63    4.38
  -1 -23 -11    4.97    3.68
  -1  23  11    9.71    2.13
  -1  23 -11   12.19    5.00
   1  23  11   11.47    2.44
   1 -23 -11   15.44    2.96
  -1  23 -11    8.23    3.06
   1 -23 -11    4.76    3.40
   1  23  11   11.84    3.41
   1  24 -11   67.92    4.18
  -1  24  11   75.00    3.70
  -1 -24 -11   68.38    5.89
   1  24 -11   76.16    5.73
  -1 -24 -11   73.35    3.21
  -1  24  11   78.11    3.11
  -1  24 -11   75.12    6.42
   1  24  11   73.45    3.40
   1 -24 -11   71.67    4.29
  -1  24 -11   77.58    4.12
   1 -24 -11   73.22    2.99
   1  24  11   77.13    3.21
   1  25 -11    4.83    5.00
  -1  25  11    7.73    2.73
  -1 -25 -11    1.01    4.71
   1  25 -11    2.63    4.44
  -1 -25 -11   -1.13    4.23
  -1  25  11    7.54    2.15
  -1  25 -11    9.06    5.30
   1  25  11   11.21    4.02
   1 -25 -11    7.15    3.22
  -1  25 -11    8.27    3.06
   1 -25 -11    5.97    3.70
   1  25  11    9.92    2.23
   1  26 -11    5.77    5.18
  -1  26  11    0.12    2.71
  -1 -26 -11    2.63    4.61
   1  26 -11   -2.76    2.92
  -1 -26 -11   -9.90    4.30
  -1  26  11    1.46    2.06
  -1  26 -11    3.43    5.26
   1  26  11   -0.24    3.96
   1 -26 -11    1.08    3.16
  -1  26 -11    3.12    3.03
   1 -26 -11   -0.46    2.33
   1  26  11    0.46    2.18
   1  27 -11    9.96    5.51
  -1  27  11    4.86    2.97
  -1 -27 -11    9.60    4.90
   1  27 -11    3.46    2.98
  -1 -27 -11    4.97    3.83
  -1  27  11    8.54    2.27
  -1  27 -11    2.55    5.58
   1  27  11    2.20    4.19
   1 -27 -11    6.28    3.31
  -1  27 -11    6.78    3.31
   1 -27 -11    4.03    3.43
   1  27  11    7.42    2.31
   1   0  12   58.82    3.40
  -1   0  12   56.13    3.67
  -1   0 -12   56.57    3.86
   1   0 -12   55.89    2.70
   1   0 -12   55.47    2.32
  -1   0 -12   53.75    2.29
  -1   0  12   51.58    2.53
   1   0  12   46.82    3.61
   1  -1  12   -0.79    1.60
  -1   1  12    0.98    1.77
   1   1 -12    2.48    3.14
  -1  -1 -12   -1.69    2.98
   1   1 -12    1.80    1.55
  -1  -1 -12    0.13    2.85
  -1   1  12   -3.53    2.96
   1  -1  12   -2.26    1.66
  -1  -1  12    0.65    1.72
   1   1  12   -0.21    1.60
   1  -1 -12    1.35    1.89
   1  -1 -12   -0.50    2.77
  -1   1 -12   -0.51    1.61
  -1  -1  12   -0.66    1.75
   1   1  12   -3.55    1.82
   1  -2  12   23.35    3.02
  -1   2  12   25.75    3.15
   1   2 -12   26.73    2.14
  -1  -2 -12   25.41    2.07
   1   2 -12   23.04    2.78
  -1  -2 -12   19.88    2.04
  -1   2  12   20.19    2.10
   1  -2  12   20.70    1.83
  -1  -2  12   20.73    3.12
   1   2  12   25.61    2.95
  -1   2 -12   22.09    3.28
   1  -2 -12   21.51    3.41
   1  -2 -12   20.52    1.97
  -1   2 -12   21.04    2.73
  -1  -2  12   17.53    3.08
   1   2  12   21.92    2.04
   1  -3  12   54.79    2.33
  -1   3  12   57.31    2.46
   1   3 -12   58.94    4.03
  -1  -3 -12   55.50    3.74
   1   3 -12   53.87    3.03
  -1  -3 -12   56.22    2.47
  -1   3  12   49.85    3.75
   1  -3  12   56.19    2.16
  -1  -3  12   55.44    2.41
   1   3  12   60.13    2.30
  -1   3 -12   58.93    2.62
   1  -3 -12   59.06    2.68
   1  -3 -12   56.02    3.66
  -1   3 -12   53.41    2.98
  -1  -3  12   50.32    3.32
   1   3  12   58.00    3.75
   1  -4  12  144.48    4.83
  -1   4  12  141.56    5.03
   1   4 -12  143.19    5.49
  -1  -4 -12  140.76    5.14
   1   4 -12  140.70    4.14
  -1  -4 -12  137.96    5.08
  -1   4  12  140.11    3.67
   1  -4  12  144.92    4.28
  -1  -4  12  146.10    3.61
   1   4  12  138.67    4.59
  -1   4 -12  143.44    5.33
   1  -4 -12  137.92    5.43
  -1   4 -12  135.88    3.02
   1  -4 -12  143.14    3.60
  -1  -4  12  141.12    3.29
   1   4  12  135.87    3.68
   1  -5  12   11.29    1.89
   1   5 -12   11.80    2.12
  -1   5  12   12.01    3.15
  -1  -5 -12   10.28    1.97
   1   5 -12   10.77    2.28
  -1  -5 -12    7.48    1.99
  -1   5  12    7.98    3.14
   1  -5  12   10.78    2.42
  -1  -5  12   13.94    3.03
  -1   5 -12    8.60    3.37
   1   5  12    9.68    1.73
   1  -5 -12   10.24    2.11
  -1   5 -12   11.06    1.34
   1  -5 -12   10.79    1.95
  -1  -5  12    9.25    1.52
   1   5  12    9.27    1.98
   1  -6  12    8.97    2.96
   1   6 -12    7.66    3.45
  -1   6  12    7.51    1.99
  -1  -6 -12    8.75    1.99
   1   6 -12    6.73    2.19
  -1  -6 -12    9.16    2.00
  -1   6  12    9.02    2.01
   1  -6  12    9.46    2.26
  -1  -6  12    7.16    1.92
  -1   6 -12    9.96    2.09
   1   6  12    9.53    1.72
   1  -6 -12   10.37    2.15
  -1   6 -12    7.17    2.12
   1  -6 -12   11.34    3.24
  -1  -6  12    8.97    2.39
   1   6  12    6.94    3.31
   1  -7  12    7.29    1.89
   1   7 -12    2.41    3.45
  -1   7  12    8.39    1.93
  -1  -7 -12   10.00    3.20
   1   7 -12    7.50    2.10
  -1  -7 -12    5.46    3.40
  -1   7  12    7.36    3.33
   1  -7  12    5.80    2.26
  -1  -7  12    4.97    3.17
  -1   7 -12    7.91    2.16
   1   7  12    7.45    2.78
   1  -7 -12    8.15    3.43
  -1   7 -12    7.52    1.95
   1  -7 -12    8.33    2.07
  -1  -7  12    4.11    2.36
   1   7  12    5.32    2.11
   1  -8  12  298.39    7.93
   1   8 -12  286.89    8.62
  -1   8  12  297.01    7.81
  -1  -8 -12  303.15    8.37
   1   8 -12  284.94    5.34
  -1  -8 -12  281.27    8.71
  -1   8  12  282.39    8.83
   1  -8  12  303.11    5.78
  -1  -8  12  297.98    6.31
  -1   8 -12  297.83    8.71
   1   8  12  303.59    7.57
   1  -8 -12  291.89    6.84
  -1   8 -12  302.11    6.33
   1  -8 -12  278.71    7.14
  -1  -8  12  300.44    7.05
   1   8  12  291.93    8.64
   1  -9  12    2.58    1.90
   1   9 -12   -0.30    3.72
  -1   9  12    1.36    3.36
  -1  -9 -12    4.87    2.01
   1   9 -12    2.56    1.95
   1  -9  12    1.45    1.35
  -1  -9  12    3.07    1.96
  -1   9 -12    2.31    3.68
   1   9  12   -1.09    1.74
   1  -9 -12    3.06    3.55
  -1   9 -12    3.65    1.14
  -1  -9  12    3.58    2.32
   1   9  12    2.77    2.26
   1 -10  12  184.79    4.51
   1  10 -12  186.12    6.73
  -1  10  12  181.42    6.11
  -1 -10 -12  184.56    6.30
   1  10 -12  179.53    4.35
  -1 -10 -12  181.86    6.84
   1 -10  12  187.92    4.48
  -1  10  12  180.59    6.37
  -1 -10  12  188.94    6.12
  -1  10 -12  184.67    4.98
   1  10  12  182.52    4.26
   1 -10 -12  182.38    5.03
  -1  10 -12  189.36    4.23
   1 -10 -12  176.59    4.75
  -1 -10  12  182.40    4.65
   1  10  12  177.81    4.68
   1 -11  12   36.65    3.75
   1  11 -12   33.38    4.33
  -1  11  12   30.51    3.89
  -1 -11 -12   35.41    2.58
   1  11 -12   35.43    2.24
  -1 -11 -12   25.20    4.56
  -1  11  12   26.10    2.71
   1 -11  12   32.29    2.53
  -1 -11  12   39.43    2.44
  -1  11 -12   38.94    2.76
   1  11  12   37.07    2.19
   1 -11 -12   36.24    4.31
  -1  11 -12   36.08    2.03
   1 -11 -12   20.56    4.35
  -1 -11  12   29.97    2.61
   1 -12  12    7.06    2.12
   1  12 -12    5.24    3.81
  -1  12  12    5.72    3.41
  -1 -12 -12    6.67    3.48
   1  12 -12    5.02    1.14
   1 -12  12    9.19    2.14
  -1 -12  12    8.70    3.42
  -1  12 -12    4.95    2.37
   1  12  12    4.02    1.87
  -1  12 -12    7.36    1.62
  -1 -12  12    7.16    1.50
   1  12  12   12.23    2.56
   1 -13  12    1.30    2.11
   1  13 -12    2.37    2.37
  -1  13  12    0.16    2.18
  -1 -13 -12    2.85    2.17
   1  13 -12    1.27    1.62
  -1 -13 -12   -6.46    3.80
   1 -13  12    0.43    1.61
  -1  13  12   -2.42    3.48
  -1 -13  12    1.18    3.35
  -1  13 -12    3.98    3.86
   1  13  12    1.91    1.86
   1 -13 -12   -0.25    2.38
  -1  13 -12    1.78    1.41
   1 -13 -12   -2.03    3.50
  -1 -13  12    1.74    1.85
   1  13  12    0.07    3.44
   1 -14  12   26.96    2.54
   1  14 -12   30.43    2.80
  -1  14  12   32.44    2.54
  -1 -14 -12   32.77    3.97
   1  14 -12   28.78    1.93
  -1 -14 -12   24.02    4.32
   1 -14  12   28.51    1.93
  -1  14  12   27.04    3.94
  -1 -14  12   30.25    2.39
  -1  14 -12   32.14    4.39
   1  14  12   29.57    3.53
   1 -14 -12   29.10    4.41
  -1  14 -12   27.70    1.65
   1 -14 -12   21.14    2.68
  -1 -14  12   27.09    2.25
   1  14  12   25.77    4.05
   1 -15  12   -0.97    3.66
   1  15 -12    3.30    3.95
  -1  15  12    3.73    3.53
  -1 -15 -12    0.13    2.22
   1  15 -12    2.03    1.50
  -1 -15 -12    9.45    2.64
  -1  15  12    7.19    2.30
  -1 -15  12    5.22    2.20
  -1  15 -12    1.94    2.57
   1  15  12    3.07    3.28
   1 -15 -12    4.23    2.43
  -1  15 -12    2.19    1.26
   1 -15 -12    5.16    2.64
  -1 -15  12    2.74    1.96
   1  15  12    2.10    2.29
   1  16 -12   42.23    3.17
  -1  16  12   42.03    2.72
  -1 -16 -12   41.39    2.83
   1  16 -12   40.60    1.92
  -1 -16 -12   38.64    2.89
   1 -16  12   44.65    1.82
  -1  16  12   42.09    2.67
  -1 -16  12   38.86    4.32
  -1  16 -12   38.79    4.90
   1  16  12   40.99    2.45
   1 -16 -12   41.13    3.16
  -1  16 -12   38.43    1.68
   1 -16 -12   43.84    2.83
  -1 -16  12   46.18    2.15
   1  16  12   43.44    4.24
   1 -17  12   24.90    4.14
   1  17 -12   12.82    4.36
  -1  17  12   12.00    3.81
  -1 -17 -12   11.38    3.98
   1  17 -12   10.57    1.51
  -1 -17 -12   18.42    4.22
   1 -17  12   13.11    1.41
  -1  17  12   16.51    3.78
  -1 -17  12   18.26    3.97
  -1  17 -12    9.83    2.80
   1  17  12   11.03    3.40
   1 -17 -12   10.43    4.21
   1 -17 -12   18.92    3.96
  -1 -17  12   16.00    1.81
   1  17  12   15.25    3.79
   1 -18  12    4.50    3.97
   1  18 -12    3.93    2.62
  -1  18  12    2.28    2.29
  -1 -18 -12    1.07    2.37
   1  18 -12    2.11    1.36
  -1 -18 -12    1.69    3.68
  -1  18  12   -1.64    3.44
   1 -18  12    2.21    1.13
  -1 -18  12    1.25    3.86
  -1  18 -12    1.93    4.34
   1  18  12    3.34    2.04
   1 -18 -12    0.57    4.15
  -1  18 -12    2.84    1.32
   1 -18 -12   -1.37    3.46
  -1 -18  12    2.13    1.41
   1  18  12   -0.15    2.20
   1 -19  12    6.75    4.10
   1  19 -12    2.59    4.45
  -1  19  12    1.63    3.84
  -1 -19 -12    6.55    2.41
   1  19 -12    3.10    1.26
  -1 -19 -12    3.76    2.31
  -1  19  12    2.90    3.42
   1 -19  12    4.86    0.93
  -1 -19  12    6.75    3.88
  -1  19 -12    6.37    4.59
   1  19  12    4.77    3.40
   1 -19 -12    4.71    2.64
  -1  19 -12    3.72    1.21
   1 -19 -12    2.37    3.49
  -1 -19  12    5.13    1.40
   1  19  12    5.25    3.52
   1 -20  12   37.62    4.87
   1  20 -12   35.47    5.22
  -1  20  12   36.04    2.77
  -1 -20 -12   35.52    3.06
  -1 -20 -12   37.67    2.78
  -1  20  12   37.16    2.60
   1 -20  12   34.21    1.08
  -1 -20  12   38.56    4.53
  -1  20 -12   39.30    3.55
   1  20  12   40.43    2.62
   1 -20 -12   35.17    3.27
   1 -20 -12   33.78    2.71
  -1 -20  12   39.01    2.06
   1  20  12   39.88    4.05
   1  21 -12   22.90    3.34
  -1  21  12   28.57    4.28
  -1 -21 -12   26.96    4.65
  -1 -21 -12   38.35    4.73
  -1  21  12   26.95    2.52
  -1 -21  12   24.03    4.57
  -1  21 -12   28.53    5.20
   1  21  12   25.59    3.93
   1 -21 -12   28.01    3.16
   1 -21 -12   35.48    4.37
  -1 -21  12   28.17    1.56
   1  21  12   30.34    3.96
   1  22 -12   28.70    5.37
  -1  22  12   29.03    4.44
  -1 -22 -12   21.28    4.69
  -1 -22 -12   22.36    2.66
  -1  22  12   23.40    2.49
  -1  22 -12   29.92    5.35
   1  22  12   25.33    2.58
   1 -22 -12   23.32    3.31
  -1  22 -12   25.34    5.08
   1 -22 -12   24.77    3.91
   1  22  12   22.33    2.57
   1  23 -12    5.03    5.02
  -1  23  12    4.17    2.61
  -1 -23 -12    2.44    4.41
   1  23 -12   -1.35    4.51
  -1 -23 -12    1.68    3.83
  -1  23  12    6.22    3.46
  -1  23 -12    4.01    3.17
   1  23  12    2.67    2.35
   1 -23 -12    4.44    3.00
  -1  23 -12   -1.96    4.84
   1 -23 -12    2.59    2.22
   1  23  12    2.99    2.28
   1  24 -12    6.37    4.94
  -1  24  12   -1.22    2.68
  -1 -24 -12    1.44    4.60
   1  24 -12   -1.38    4.42
  -1 -24 -12  -11.38    4.43
  -1  24  12    2.45    3.42
  -1  24 -12   -0.57    3.19
   1  24  12   -3.38    3.89
   1 -24 -12    1.20    3.15
  -1  24 -12   -4.25    4.86
   1 -24 -12   -3.25    4.10
   1  24  12    1.25    3.63
   1  25 -12    0.25    3.28
  -1  25  12   -1.32    4.35
  -1 -25 -12    6.97    4.65
   1  25 -12    1.61    4.55
  -1  25  12    0.77    3.38
  -1  25 -12    2.47    3.28
   1  25  12    7.16    4.01
   1 -25 -12    1.14    3.16
  -1  25 -12   -0.98    5.10
   1  25  12    2.63    3.62
   1  26 -12    3.75    3.41
  -1  26  12    8.19    4.66
  -1 -26 -12    3.10    4.83
   1  26 -12    7.23    4.83
  -1 -26 -12   -3.45    4.23
  -1  26  12    6.83    3.63
  -1  26 -12    3.37    3.50
   1  26  12   -2.90    4.14
   1 -26 -12    2.06    3.32
  -1  26 -12    4.84    3.25
   1 -26 -12    0.72    3.86
   1  26  12    7.85    3.83
   1   0  13    1.08    1.73
  -1   0  13   -0.66    3.06
  -1   0 -13    0.69    3.16
   1   0 -13    1.88    2.11
   1   0 -13    0.34    2.82
  -1   0 -13   -0.70    1.74
  -1   0  13   -1.55    1.84
   1   0  13   -4.56    1.86
   1  -1  13    0.83    2.91
  -1   1  13    0.31    1.88
   1   1 -13    3.85    3.41
  -1  -1 -13   -1.00    1.96
   1   1 -13   -2.66    2.80
  -1  -1 -13   -0.16    2.89
  -1   1  13   -3.78    3.17
   1  -1  13   -5.34    2.95
  -1  -1  13    0.71    3.07
   1   1  13    1.21    2.73
  -1   1 -13   -2.34    2.00
   1  -1 -13   -1.24    2.12
   1  -1 -13   -1.86    1.84
  -1   1 -13    1.55    2.67
  -1  -1  13   -6.20    2.98
   1   1  13   -4.79    1.91
   1  -2  13   10.18    1.95
  -1   2  13   11.31    3.24
   1   2 -13   11.71    2.25
  -1  -2 -13   12.33    3.35
   1   2 -13    9.51    1.78
  -1  -2 -13   10.31    1.99
  -1   2  13    8.68    2.21
   1  -2  13    8.76    3.03
  -1  -2  13    9.98    1.99
   1   2  13   11.60    2.95
  -1   2 -13   13.67    3.41
   1  -2 -13   16.21    3.51
   1  -2 -13    6.85    3.28
  -1   2 -13   12.51    2.78
  -1  -2  13    3.23    3.20
   1   2  13    5.27    3.52
   1  -3  13   64.00    3.98
  -1   3  13   68.73    2.76
   1   3 -13   67.56    4.46
  -1  -3 -13   65.38    2.87
   1   3 -13   63.31    3.60
  -1  -3 -13   60.01    4.17
  -1   3  13   62.41    3.03
   1  -3  13   73.75    3.97
  -1  -3  13   63.12    4.13
   1   3  13   66.60    2.52
  -1   3 -13   68.66    2.96
   1  -3 -13   71.18    3.05
   1  -3 -13   60.37    2.88
  -1   3 -13   66.68    2.38
  -1  -3  13   70.88    4.07
   1   3  13   64.67    2.98
   1  -4  13   24.07    2.12
  -1   4  13   24.37    2.25
   1   4 -13   19.52    3.87
  -1  -4 -13   26.34    3.64
   1   4 -13   27.50    2.99
  -1  -4 -13   21.94    3.94
  -1   4  13   33.55    4.18
   1  -4  13   30.54    3.30
  -1  -4  13   24.65    2.29
   1   4  13   24.83    3.17
  -1   4 -13   23.14    2.43
   1  -4 -13   24.86    3.99
   1  -4 -13   36.02    4.19
  -1   4 -13   24.57    1.83
  -1  -4  13   27.37    2.19
   1   4  13   27.43    2.55
   1  -5  13   28.90    2.26
  -1   5  13   29.19    3.60
   1   5 -13   30.40    2.60
  -1  -5 -13   28.06    3.71
   1   5 -13   32.80    2.97
   1  -5  13   31.72    3.21
  -1  -5  13   26.02    3.65
   1   5  13   23.11    3.23
  -1   5 -13   26.89    3.95
   1  -5 -13   29.91    2.63
  -1   5 -13   29.32    2.90
  -1  -5  13   31.39    2.15
   1   5  13   37.01    4.02
   1  -6  13  100.86    4.60
  -1   6  13   96.44    4.87
   1   6 -13  104.40    3.74
  -1  -6 -13  101.87    3.50
   1   6 -13  104.71    3.78
  -1  -6 -13  101.01    3.64
  -1   6  13   85.09    5.48
   1  -6  13  103.69    3.96
  -1  -6  13   99.98    3.32
   1   6  13   97.10    2.96
  -1   6 -13   95.28    5.18
   1  -6 -13  100.67    5.24
  -1   6 -13  103.98    3.66
   1  -6 -13   86.09    3.74
  -1  -6  13   98.71    4.19
   1   6  13   97.99    3.52
   1  -7  13    2.89    2.01
   1   7 -13    1.54    2.32
  -1  -7 -13    6.82    3.44
   1   7 -13    0.23    2.28
  -1  -7 -13   -3.82    3.76
  -1   7  13    1.74    2.23
   1  -7  13    2.74    2.42
  -1  -7  13    1.06    2.05
  -1   7 -13    4.02    2.29
   1   7  13    4.33    1.78
   1  -7 -13    4.16    2.29
  -1   7 -13    1.79    2.12
   1  -7 -13   -0.90    2.24
  -1  -7  13    3.35    2.55
   1   7  13    1.97    3.57
   1  -8  13  246.37    7.54
  -1   8  13  247.71    5.71
  -1  -8 -13  248.28    6.05
   1   8 -13  243.66    5.85
  -1  -8 -13  249.78    8.09
  -1   8  13  244.70    6.09
   1  -8  13  238.62    6.27
  -1  -8  13  251.88    7.42
  -1   8 -13  253.14    6.33
   1   8  13  260.00    7.04
   1  -8 -13  259.28    8.24
  -1   8 -13  240.66    4.60
   1  -8 -13  238.87    8.05
  -1  -8  13  242.77    6.46
   1   8  13  236.06    6.17
   1  -9  13  159.63    5.83
   1   9 -13  148.70    6.63
  -1   9  13  144.17    4.12
  -1  -9 -13  157.04    6.07
   1   9 -13  147.81    3.26
  -1  -9 -13  162.97    7.22
   1  -9  13  164.07    5.19
  -1  -9  13  148.55    4.15
  -1   9 -13  150.97    4.55
   1   9  13  148.41    5.38
   1  -9 -13  146.27    4.64
  -1   9 -13  150.60    4.12
   1  -9 -13  176.71    7.26
  -1  -9  13  167.64    5.41
   1 -10  13   84.67    3.21
   1  10 -13   77.21    3.55
  -1  10  13   84.47    3.19
  -1 -10 -13   80.45    3.29
   1  10 -13   81.23    3.08
  -1 -10 -13   72.83    5.95
   1 -10  13   76.07    2.36
  -1  10  13   73.13    3.78
  -1 -10  13   80.79    4.61
  -1  10 -13   79.73    5.22
   1  10  13   81.60    4.24
   1 -10 -13   87.00    5.24
  -1  10 -13   82.16    2.93
   1 -10 -13   66.65    5.83
  -1 -10  13   79.77    3.76
   1  10  13   69.05    3.61
   1 -11  13   18.00    2.39
   1  11 -13   14.59    2.59
  -1  11  13   17.11    2.38
  -1 -11 -13   20.22    3.92
   1  11 -13   16.00    1.35
  -1 -11 -13   13.85    4.30
   1 -11  13   19.47    2.15
  -1  11  13   15.35    3.94
  -1 -11  13   13.96    3.68
  -1  11 -13   10.86    4.21
   1  11  13   17.40    3.37
   1 -11 -13   19.08    2.65
  -1  11 -13   17.46    1.91
   1 -11 -13   12.06    3.97
  -1 -11  13   17.83    1.55
   1  11  13   18.30    3.97
   1 -12  13   83.13    4.76
   1  12 -13   78.55    3.56
  -1  12  13   78.97    4.86
  -1 -12 -13   77.23    3.40
   1  12 -13   77.39    2.85
  -1 -12 -13   68.16    5.39
  -1  12  13   77.39    3.44
   1 -12  13   82.35    3.06
  -1 -12  13   78.36    3.21
  -1  12 -13   83.58    5.33
   1  12  13   85.40    4.32
   1 -12 -13   83.28    5.37
  -1  12 -13   76.31    1.98
   1 -12 -13   67.95    5.41
  -1 -12  13   77.65    3.43
   1  12  13   77.18    3.44
   1 -13  13   34.70    4.24
   1  13 -13   36.02    4.69
  -1  13  13   36.33    4.23
  -1 -13 -13   37.26    4.27
   1  13 -13   35.51    2.22
   1 -13  13   39.37    2.40
  -1 -13  13   36.75    2.70
  -1  13 -13   40.27    3.04
   1  13  13   36.47    2.42
   1 -13 -13   37.28    4.69
  -1  13 -13   37.29    2.10
  -1 -13  13   41.77    2.79
   1  13  13   43.34    4.72
   1 -14  13   21.56    4.05
   1  14 -13   27.83    4.47
  -1  14  13   26.92    2.55
  -1 -14 -13   22.07    2.58
   1  14 -13   21.63    1.33
  -1 -14 -13   14.23    4.48
   1 -14  13   24.45    1.32
  -1  14  13   21.33    4.26
  -1 -14  13   21.54    3.94
  -1  14 -13   19.23    2.93
   1  14  13   21.10    2.19
   1 -14 -13   23.48    2.92
  -1  14 -13   21.18    1.78
   1 -14 -13   14.41    4.33
  -1 -14  13   24.50    1.50
   1  14  13   23.98    2.71
   1 -15  13   14.67    2.56
   1  15 -13   13.63    2.80
  -1  15  13   16.39    2.48
  -1 -15 -13   18.77    2.59
   1  15 -13   15.25    1.81
  -1 -15 -13   10.54    4.73
  -1  15  13   14.53    4.12
   1 -15  13   17.39    1.89
  -1 -15  13   16.62    3.95
  -1  15 -13   17.50    4.61
   1  15  13   18.72    3.47
   1 -15 -13   16.15    2.75
  -1  15 -13   15.12    1.61
   1 -15 -13   13.83    4.44
  -1 -15  13   18.02    2.19
   1  15  13   13.12    2.56
   1 -16  13   26.25    2.78
   1  16 -13   27.08    4.86
  -1  16  13   26.76    4.21
  -1 -16 -13   25.86    4.24
   1  16 -13   25.08    1.31
  -1 -16 -13   25.27    2.89
   1 -16  13   29.62    1.82
  -1  16  13   23.88    2.59
  -1 -16  13   27.74    4.36
  -1  16 -13   28.86    3.14
   1  16  13   32.12    3.70
   1 -16 -13   22.04    4.63
  -1  16 -13   24.08    1.65
   1 -16 -13   26.11    4.36
  -1 -16  13   27.51    1.40
   1  16  13   23.10    4.08
   1 -17  13    2.31    2.56
   1  17 -13    1.68    2.69
  -1  17  13    3.84    2.39
  -1 -17 -13    4.44    3.95
   1  17 -13    3.12    1.55
  -1 -17 -13    1.51    2.46
  -1  17  13    6.06    3.75
   1 -17  13    3.28    1.43
  -1 -17  13    3.50    2.43
  -1  17 -13    3.37    4.53
   1  17  13    2.90    2.13
   1 -17 -13    3.27    4.23
  -1  17 -13    2.32    1.28
   1 -17 -13    1.83    2.29
  -1 -17  13    3.57    1.70
   1  17  13    4.56    2.30
   1 -18  13   10.21    2.68
   1  18 -13   14.58    4.64
  -1  18  13    8.98    4.06
  -1 -18 -13   10.53    2.60
   1  18 -13    9.46    1.61
  -1 -18 -13   11.72    4.18
  -1  18  13   13.00    3.87
   1 -18  13   10.43    1.39
  -1 -18  13   12.32    2.57
  -1  18 -13    9.93    3.04
   1  18  13   11.83    3.63
   1 -18 -13   11.40    2.82
  -1  18 -13    8.30    1.27
   1 -18 -13    8.68    2.44
  -1 -18  13   11.37    1.66
   1  18  13   10.01    2.43
   1 -19  13    5.20    2.59
   1  19 -13    7.89    2.88
  -1  19  13    1.15    2.34
  -1 -19 -13    7.14    4.00
   1  19 -13    2.61    1.44
  -1 -19 -13    2.96    4.18
  -1  19  13    3.02    3.68
   1 -19  13    3.39    1.26
  -1 -19  13    6.57    2.54
  -1  19 -13    3.25    2.93
   1  19  13   -0.01    2.20
   1 -19 -13    2.03    2.72
  -1  19 -13    1.45    1.11
   1 -19 -13    0.88    3.91
  -1 -19  13    2.48    1.66
   1  19  13   -0.58    3.76
   1 -20  13    0.44    2.62
   1  20 -13    5.08    4.67
  -1  20  13    0.56    3.87
  -1 -20 -13    0.42    4.11
   1  20 -13    0.11    1.31
  -1 -20 -13    5.09    2.70
  -1  20  13    0.40    2.32
   1 -20  13   -0.35    0.99
  -1 -20  13    0.55    2.55
  -1  20 -13   -2.80    4.82
   1  20  13    2.49    3.51
   1 -20 -13    1.69    2.72
   1 -20 -13    2.32    4.15
  -1 -20  13    0.09    2.04
   1  20  13    2.66    3.67
   1 -21  13    8.19    2.87
   1  21 -13    2.27    5.03
  -1  21  13    9.38    4.10
  -1 -21 -13    9.95    4.33
  -1 -21 -13    7.60    2.68
  -1  21  13    9.29    2.31
  -1 -21  13    5.46    2.79
  -1  21 -13    5.65    3.26
   1  21  13   10.96    2.36
   1 -21 -13    9.57    4.84
   1 -21 -13    3.92    2.46
   1  21  13    9.41    2.45
   1  22 -13   61.34    4.20
  -1  22  13   64.04    3.55
  -1 -22 -13   63.60    5.68
  -1 -22 -13   70.54    5.27
  -1  22  13   60.33    4.80
  -1 -22  13   64.50    3.75
  -1  22 -13   66.63    4.26
   1  22  13   66.52    3.25
   1 -22 -13   63.48    6.16
  -1  22 -13   61.13    4.08
   1 -22 -13   62.58    3.33
   1  22  13   62.52    4.91
   1  23 -13    0.26    3.25
  -1  23  13    5.41    4.20
  -1 -23 -13    3.68    4.63
   1  23 -13   -0.91    2.83
  -1 -23 -13   -2.53    3.05
  -1  23  13   -0.48    3.85
  -1  23 -13    1.86    5.28
   1  23  13    4.71    3.93
   1 -23 -13    4.84    4.98
  -1  23 -13   -0.14    3.04
   1 -23 -13    5.80    4.64
   1  23  13    1.82    3.81
   1  24 -13   70.75    6.59
  -1  24  13   67.93    5.78
  -1 -24 -13   62.86    4.12
   1  24 -13   62.03    3.85
  -1 -24 -13   50.54    6.30
  -1  24  13   69.59    5.01
  -1  24 -13   60.12    6.91
   1  24  13   64.41    5.16
   1 -24 -13   68.61    6.40
  -1  24 -13   68.65    6.37
   1 -24 -13   58.62    3.68
   1  24  13   66.56    5.05
   1  25 -13   22.76    6.04
  -1  25  13   25.48    5.14
  -1 -25 -13   23.69    3.49
   1  25 -13   23.16    3.48
  -1 -25 -13   24.55    3.10
  -1  25  13   26.31    4.28
  -1  25 -13   26.69    6.14
   1  25  13   27.16    2.87
   1 -25 -13   23.91    5.76
  -1  25 -13   19.85    5.72
   1 -25 -13   25.05    4.50
   1  25  13   26.91    2.85
   1   0  14   13.10    3.16
  -1   0  14   10.16    2.20
  -1   0 -14   13.14    2.43
   1   0 -14    9.79    4.06
   1   0 -14    8.20    2.05
  -1   0 -14   10.80    2.00
  -1   0  14    7.80    2.19
   1   0  14    8.44    3.53
   1  -1  14   -1.08    1.93
  -1   1  14   -0.06    3.33
   1   1 -14   -1.08    2.29
  -1  -1 -14    4.16    3.56
   1   1 -14    1.76    3.00
  -1  -1 -14    3.65    3.24
  -1   1  14   -0.24    2.12
  -1  -1  14    5.59    3.39
   1   1  14    4.04    3.12
  -1   1 -14   -0.96    3.56
   1  -1 -14    0.94    3.71
   1  -1 -14    0.29    3.22
  -1   1 -14   -2.29    2.94
  -1  -1  14   -0.99    3.28
   1   1  14   -7.34    3.37
   1  -2  14   36.39    3.62
  -1   2  14   35.37    3.90
   1   2 -14   36.14    4.30
  -1  -2 -14   29.69    2.62
   1   2 -14   32.62    3.40
  -1  -2 -14   29.81    2.43
  -1   2  14   24.54    4.18
   1  -2  14   28.26    2.43
  -1  -2  14   29.79    3.95
   1   2  14   31.14    2.21
  -1   2 -14   33.83    4.18
   1  -2 -14   31.32    2.74
   1  -2 -14   31.58    2.49
  -1   2 -14   30.37    2.11
  -1  -2  14   22.29    3.84
   1   2  14   25.64    2.60
   1  -3  14   22.30    3.61
  -1   3  14   25.21    2.36
   1   3 -14   19.49    4.19
  -1  -3 -14   18.69    3.89
   1   3 -14   21.37    2.03
  -1  -3 -14   16.46    3.80
  -1   3  14   15.13    2.62
   1  -3  14   17.19    2.30
  -1  -3  14   23.32    2.38
   1   3  14   25.55    2.11
  -1   3 -14   24.51    2.54
   1  -3 -14   23.03    4.08
   1  -3 -14   15.54    3.90
  -1   3 -14   21.66    1.96
  -1  -3  14   15.20    2.33
   1   3  14   12.02    2.73
   1  -4  14   43.52    2.48
  -1   4  14   43.14    2.62
   1   4 -14   34.85    4.59
  -1  -4 -14   37.80    2.68
   1   4 -14   38.86    2.18
  -1  -4 -14   32.05    2.84
  -1   4  14   23.68    5.05
   1  -4  14   43.66    2.65
  -1  -4  14   43.57    4.06
   1   4  14   41.91    3.59
  -1   4 -14   39.52    2.78
   1  -4 -14   39.81    2.84
  -1   4 -14   37.26    3.27
  -1  -4  14   38.27    2.67
   1   4  14   37.20    5.07
   1  -5  14    2.13    3.41
  -1   5  14    0.75    2.10
   1   5 -14    0.29    2.38
  -1  -5 -14   -1.72    3.56
   1   5 -14    5.20    2.85
  -1  -5 -14    4.04    2.64
  -1  -5  14    0.47    3.40
   1   5  14    4.14    3.15
   1  -5 -14   -1.63    3.86
  -1   5 -14    6.81    2.84
   1  -6  14   89.31    4.76
  -1   6  14   92.11    4.89
   1   6 -14   87.29    3.76
  -1  -6 -14   85.55    3.59
   1   6 -14   94.37    4.00
  -1   6  14  106.98    6.28
   1  -6  14   89.44    3.16
  -1  -6  14   84.99    3.31
   1   6  14   86.42    3.05
  -1   6 -14   88.11    5.36
   1  -6 -14   97.97    5.49
  -1   6 -14   95.05    3.87
  -1  -6  14  100.69    4.87
   1   6  14   85.01    6.06
   1  -7  14    3.15    2.15
  -1   7  14    1.57    3.66
   1   7 -14    3.57    2.56
  -1  -7 -14   10.53    3.75
   1   7 -14    0.89    2.58
   1  -7  14    3.08    1.68
  -1  -7  14    6.46    3.61
  -1   7 -14    1.42    4.04
   1  -7 -14    7.60    2.45
  -1   7 -14    5.18    2.42
   1   7  14   -5.38    4.16
   1  -8  14   20.58    2.35
   1   8 -14   16.36    2.74
  -1   8  14   21.54    3.85
  -1  -8 -14   15.28    2.45
   1   8 -14   19.45    1.63
  -1  -8 -14   17.07    4.16
  -1   8  14   18.38    4.16
   1  -8  14   16.98    1.77
  -1  -8  14   20.19    3.67
  -1   8 -14   15.31    4.16
   1   8  14   17.09    2.11
   1  -8 -14   15.87    4.29
  -1   8 -14   20.59    2.40
   1  -8 -14   14.35    4.16
  -1  -8  14   16.36    2.88
   1   8  14   17.31    2.70
   1  -9  14    0.02    4.04
   1   9 -14    0.32    2.45
  -1   9  14   -2.45    3.74
  -1  -9 -14    4.04    3.67
   1   9 -14   -0.73    1.42
  -1  -9 -14   -4.70    4.09
  -1   9  14   -1.53    2.45
   1  -9  14   -2.75    2.49
  -1   9 -14   -5.53    4.02
   1   9  14   -2.08    1.99
   1  -9 -14    0.08    2.45
  -1   9 -14    1.75    2.07
   1  -9 -14   -4.13    2.38
  -1  -9  14   -7.71    2.67
   1   9  14  -10.07    4.00
   1 -10  14   43.65    4.11
   1  10 -14   40.31    3.18
  -1  10  14   41.94    4.21
  -1 -10 -14   43.68    2.92
   1  10 -14   42.52    2.72
  -1 -10 -14   36.52    3.65
  -1  10  14   52.06    5.24
   1 -10  14   49.87    3.24
  -1 -10  14   39.70    2.64
  -1  10 -14   38.74    4.72
   1  10  14   42.27    2.53
   1 -10 -14   49.38    4.73
  -1  10 -14   42.52    1.75
   1 -10 -14   49.95    3.50
  -1 -10  14   47.13    2.40
   1  10  14   48.85    3.22
   1 -11  14   10.07    2.33
   1  11 -14    1.63    4.35
  -1  11  14    7.93    3.63
  -1 -11 -14    2.10    3.95
   1  11 -14    7.51    2.16
  -1 -11 -14    1.42    3.23
  -1  11  14    2.07    2.69
   1 -11  14    5.30    1.49
  -1 -11  14    5.58    3.62
  -1  11 -14    7.77    2.59
   1  11  14    5.72    2.06
   1 -11 -14    8.47    4.25
  -1  11 -14    9.66    2.05
   1 -11 -14   -0.53    2.86
  -1 -11  14    3.64    1.65
   1  11  14    7.14    4.33
   1 -12  14   10.72    2.43
   1  12 -14   12.26    4.36
  -1  12  14   13.22    2.42
  -1 -12 -14   12.48    4.03
   1  12 -14   11.56    1.37
  -1 -12 -14   10.92    2.92
   1 -12  14   12.51    2.28
  -1  12  14   11.56    4.27
  -1 -12  14   11.13    3.92
  -1  12 -14   14.05    2.76
   1  12  14   13.78    2.04
   1 -12 -14   12.38    2.81
  -1  12 -14   12.57    1.26
   1 -12 -14   10.28    2.70
  -1 -12  14   13.75    2.51
   1  12  14   11.55    2.67
   1 -13  14    2.20    2.33
   1  13 -14    0.00    2.44
  -1  13  14    0.57    2.28
  -1 -13 -14    2.94    2.45
   1  13 -14    0.58    1.97
  -1 -13 -14   -3.01    4.69
  -1  13  14    2.79    2.56
   1 -13  14    3.99    2.11
  -1 -13  14    0.68    2.29
  -1  13 -14   -2.81    4.39
   1  13  14    1.06    3.28
   1 -13 -14    4.55    2.55
  -1  13 -14   -0.74    1.78
   1 -13 -14    1.16    2.70
  -1 -13  14    3.93    2.38
   1  13  14   -0.07    4.10
   1 -14  14    1.32    2.44
   1  14 -14    3.95    2.75
  -1  14  14    5.93    3.80
  -1 -14 -14    7.48    3.82
   1  14 -14    3.21    1.87
  -1 -14 -14   -3.05    4.54
   1 -14  14    2.37    1.86
  -1  14  14    0.57    2.53
  -1 -14  14    3.46    2.35
  -1  14 -14    6.27    4.44
   1  14  14    0.32    3.34
   1 -14 -14   -0.61    4.23
  -1  14 -14    2.55    1.68
   1 -14 -14    1.66    2.59
  -1 -14  14    2.53    1.33
   1  14  14    0.87    4.13
   1 -15  14   10.04    4.17
   1  15 -14    4.43    4.54
  -1  15  14    9.84    2.41
  -1 -15 -14    7.85    4.00
   1  15 -14    5.52    1.85
  -1 -15 -14   12.90    4.31
  -1  15  14    8.43    3.98
   1 -15  14    6.57    1.83
  -1 -15  14    5.52    2.51
  -1  15 -14    5.06    2.94
   1  15  14    3.94    2.16
   1 -15 -14    6.73    4.24
  -1  15 -14    4.54    1.58
   1 -15 -14    7.54    2.58
  -1 -15  14    6.27    2.04
   1  15  14    8.36    2.50
   1 -16  14   20.14    4.32
   1  16 -14   12.62    3.03
  -1  16  14    8.61    2.59
  -1 -16 -14   12.87    2.65
   1  16 -14   12.27    1.22
  -1 -16 -14   14.06    4.46
  -1  16  14   13.88    2.59
   1 -16  14   14.36    1.79
  -1 -16  14   14.77    2.66
  -1  16 -14   13.17    4.79
   1  16  14   11.86    3.70
   1 -16 -14   13.37    2.76
  -1  16 -14   12.22    1.71
   1 -16 -14   14.81    2.67
  -1 -16  14   13.85    2.18
   1  16  14   20.16    4.16
   1 -17  14    2.63    4.22
   1  17 -14    7.30    4.73
  -1  17  14    0.42    3.94
  -1 -17 -14    3.71    2.53
   1  17 -14    4.99    1.72
  -1 -17 -14    6.00    2.62
  -1  17  14    4.38    2.46
   1 -17  14    3.95    1.70
  -1 -17  14    5.99    4.12
  -1  17 -14    3.75    3.02
   1  17  14    8.01    3.55
   1 -17 -14    2.28    2.75
  -1  17 -14    3.90    1.52
   1 -17 -14    6.27    4.22
  -1 -17  14    6.27    1.96
   1  17  14    3.53    2.51
   1 -18  14    1.27    4.17
   1  18 -14    1.70    2.90
  -1  18  14    2.54    2.43
  -1 -18 -14    0.53    4.12
   1  18 -14    2.23    1.58
  -1 -18 -14    3.24    2.78
  -1  18  14    3.23    4.09
   1 -18  14    2.46    1.53
  -1 -18  14   -3.31    4.24
  -1  18 -14    0.70    4.81
   1  18  14   -3.62    2.24
   1 -18 -14    1.75    4.43
  -1  18 -14    2.07    1.37
   1 -18 -14    8.93    4.35
  -1 -18  14    3.30    2.06
   1  18  14    2.04    4.11
   1 -19  14   -2.09    4.35
   1  19 -14    1.07    4.84
  -1  19  14    3.69    3.96
  -1 -19 -14    2.61    4.19
   1  19 -14   -0.37    1.58
  -1 -19 -14   -1.30    4.38
  -1  19  14   -3.45    3.93
   1 -19  14    0.11    1.83
  -1 -19  14   -5.88    4.22
  -1  19 -14   -4.37    4.97
   1  19  14    0.96    3.60
   1 -19 -14    1.89    4.60
   1 -19 -14   -4.27    4.21
  -1 -19  14   -1.60    1.74
   1  19  14    1.74    3.97
   1 -20  14   14.39    4.81
   1  20 -14   11.76    3.31
  -1  20  14   16.25    4.36
  -1 -20 -14   13.00    4.65
  -1 -20 -14   15.59    4.56
  -1  20  14   16.99    2.62
  -1 -20  14   16.56    4.72
  -1  20 -14   16.62    3.38
   1  20  14   14.71    3.97
   1 -20 -14   17.18    4.84
   1 -20 -14   12.46    2.74
  -1 -20  14   15.38    1.82
   1  20  14   13.52    2.74
   1 -21  14   10.60    4.85
   1  21 -14   12.48    3.30
  -1  21  14   14.76    2.74
  -1 -21 -14   13.93    2.96
  -1 -21 -14    9.52    3.00
  -1  21  14   12.13    2.67
  -1 -21  14   15.73    4.66
  -1  21 -14    9.34    5.54
   1  21  14   12.63    2.53
   1 -21 -14   14.72    5.08
   1 -21 -14    7.82    4.50
   1  21  14   13.50    2.71
   1  22 -14    4.90    5.44
  -1  22  14    4.70    4.40
  -1 -22 -14    6.37    2.99
  -1  22  14    6.87    4.18
  -1 -22  14    7.89    4.58
  -1  22 -14    0.99    5.47
   1  22  14    5.02    4.10
   1 -22 -14    7.06    5.09
   1  22  14    5.45    4.30
   1  23 -14   -0.98    5.43
  -1  23  14    3.54    4.47
  -1 -23 -14   -0.34    2.94
  -1 -23 -14    3.76    5.31
  -1  23  14    0.12    4.06
  -1  23 -14   -1.53    3.50
   1  23  14   -1.96    2.55
   1 -23 -14    2.27    5.09
  -1  23 -14   -2.23    3.08
   1  23  14    3.12    4.02
   1  24 -14    0.54    3.52
  -1  24  14    4.53    2.87
  -1 -24 -14    1.49    3.10
   1  24 -14    1.69    4.99
  -1 -24 -14    3.13    2.95
  -1  24  14    3.07    4.14
  -1  24 -14    6.10    3.52
   1  24  14    4.47    2.62
   1 -24 -14    0.28    5.33
  -1  24 -14    3.88    3.25
   1 -24 -14    4.35    4.33
   1  24  14    3.16    2.66
  -1   0  15    4.83    3.60
  -1   0 -15    2.29    2.36
   1   0 -15    1.57    2.49
   1   0 -15   -1.29    3.26
  -1   0 -15   -2.26    3.24
  -1   0  15    1.54    3.55
   1   0  15   -1.31    2.15
   1   1 -15   46.66    4.74
  -1  -1 -15   37.10    2.92
   1   1 -15   47.28    2.47
  -1  -1 -15   39.20    4.06
  -1   1  15   42.53    2.79
   1  -1  15   42.31    2.62
  -1  -1  15   43.84    2.77
   1   1  15   42.33    2.54
  -1   1 -15   46.91    4.55
   1  -1 -15   39.31    3.00
   1  -1 -15   40.95    2.61
  -1   1 -15   45.91    3.77
  -1  -1  15   39.52    4.06
   1   1  15   42.54    2.73
   1  -2  15   13.88    3.55
  -1  -2 -15   15.07    3.85
   1   2 -15    9.20    2.01
  -1  -2 -15    9.82    2.32
  -1   2  15   13.75    3.95
   1  -2  15    6.81    3.45
  -1  -2  15   12.27    2.30
   1   2  15   10.61    2.13
  -1   2 -15    9.30    4.19
   1  -2 -15   14.33    4.12
   1  -2 -15   14.12    3.74
  -1   2 -15    8.38    1.98
  -1  -2  15    9.39    3.55
   1   2  15   10.69    3.90
   1  -3  15    1.07    2.11
  -1   3  15   -0.23    2.23
  -1  -3 -15    0.22    2.34
   1   3 -15   -1.87    2.92
  -1  -3 -15   -0.38    3.67
  -1   3  15    0.56    3.82
   1  -3  15    1.55    3.21
  -1   3 -15    1.33    2.30
   1  -3 -15    1.52    2.45
   1  -3 -15   -3.34    3.70
  -1   3 -15   -1.46    2.88
  -1  -3  15    1.44    1.98
   1   3  15   -1.23    3.74
   1  -4  15  128.08    3.87
  -1   4  15  140.06    3.95
   1   4 -15  131.60    4.60
  -1  -4 -15  130.31    4.26
   1   4 -15  133.23    4.88
  -1  -4 -15  131.36    4.19
  -1   4  15  134.21    4.24
   1  -4  15  122.90    5.19
  -1  -4  15  134.68    5.65
  -1   4 -15  133.58    4.33
   1  -4 -15  131.89    4.46
   1  -4 -15  126.39    4.14
  -1   4 -15  132.21    4.76
  -1  -4  15  131.54    3.86
   1   4  15  128.23    4.28
   1  -5  15   -0.20    3.51
  -1   5  15    0.11    2.20
   1   5 -15   -0.60    2.50
  -1  -5 -15    3.66    3.90
   1   5 -15   -2.30    1.76
  -1  -5 -15   -2.96    2.50
   1  -5  15    2.45    3.26
  -1  -5  15    0.62    2.23
  -1   5 -15    2.10    2.49
   1  -5 -15   -0.11    3.98
  -1   5 -15   -0.94    1.69
   1   5  15   -9.53    4.21
   1  -6  15  152.35    5.96
  -1   6  15  149.58    4.31
   1   6 -15  155.14    4.93
  -1  -6 -15  153.93    4.75
   1   6 -15  148.96    3.81
  -1  -6 -15  132.24    7.61
  -1   6  15  153.39    5.22
   1  -6  15  159.88    5.97
  -1  -6  15  152.98    4.32
   1   6  15  148.85    5.51
  -1   6 -15  140.78    6.93
   1  -6 -15  148.51    4.92
  -1   6 -15  148.02    3.75
   1  -6 -15  150.46    7.65
  -1  -6  15  167.15    6.31
   1   6  15  156.78    7.18
   1  -7  15   37.58    2.64
  -1   7  15   35.35    2.63
   1   7 -15   35.52    3.14
  -1  -7 -15   37.90    4.46
   1   7 -15   40.28    2.22
   1  -7  15   37.03    3.78
  -1  -7  15   39.38    4.30
  -1   7 -15   34.66    4.87
   1  -7 -15   34.03    3.13
  -1   7 -15   41.94    2.19
  -1  -7  15   45.78    4.17
   1   7  15   45.00    3.27
  -1   8  15    1.01    2.21
   1   8 -15   -1.50    2.66
  -1  -8 -15    3.46    2.37
   1   8 -15   -1.12    1.58
   1  -8  15   -3.34    2.75
  -1  -8  15    1.89    3.60
  -1   8 -15    0.00    4.11
   1  -8 -15    1.29    4.01
  -1   8 -15    1.62    1.54
   1   8  15   -8.45    4.26
   1  -9  15   -1.02    3.73
   1   9 -15    2.02    2.68
  -1   9  15    4.08    2.30
  -1  -9 -15    2.29    3.95
   1   9 -15    3.38    1.49
  -1   9  15    5.22    4.34
   1  -9  15    2.36    1.67
  -1  -9  15    2.08    2.29
  -1   9 -15    6.95    2.67
   1   9  15    1.56    3.13
   1  -9 -15    2.38    2.60
  -1   9 -15    1.06    1.40
   1  -9 -15   -0.41    2.78
  -1  -9  15    1.26    1.78
   1   9  15    4.70    2.73
   1 -10  15    5.32    3.80
   1  10 -15    3.97    4.53
  -1  10  15    7.40    2.34
  -1 -10 -15    2.50    3.99
   1  10 -15    6.79    2.29
  -1 -10 -15   12.68    2.99
  -1  10  15    5.77    2.84
   1 -10  15    5.10    2.74
  -1 -10  15    1.22    2.41
  -1  10 -15    7.83    2.70
   1  10  15    3.19    3.32
   1 -10 -15    4.61    2.68
  -1  10 -15    7.26    2.25
   1 -10 -15    3.96    4.77
  -1 -10  15    6.03    1.86
   1  10  15    4.55    4.48
   1 -11  15    1.12    3.97
   1  11 -15   -2.01    4.58
  -1  11  15   -0.06    2.35
  -1 -11 -15   -0.38    2.42
   1  11 -15   -0.10    2.18
  -1 -11 -15    6.71    2.86
  -1  11  15   11.63    4.39
   1 -11  15   -0.02    2.55
  -1 -11  15    1.74    2.36
  -1  11 -15   -1.20    2.79
   1  11  15    1.84    3.36
   1 -11 -15   -7.18    4.34
  -1  11 -15    0.68    2.10
   1 -11 -15   10.78    4.55
  -1 -11  15    2.53    2.72
   1  11  15    3.12    2.77
   1 -12  15   37.54    4.57
   1  12 -15   36.72    3.37
  -1  12  15   38.94    4.41
  -1 -12 -15   33.67    4.68
   1  12 -15   35.01    1.78
  -1 -12 -15   34.58    3.31
  -1  12  15   34.24    3.13
   1 -12  15   38.63    1.81
  -1 -12  15   36.87    4.52
  -1  12 -15   33.54    5.18
   1  12  15   33.87    3.92
   1 -12 -15   34.76    5.05
  -1  12 -15   35.77    1.66
   1 -12 -15   35.22    4.99
  -1 -12  15   33.90    2.87
   1  12  15   28.91    4.99
   1 -13  15    6.17    2.56
   1  13 -15   10.60    2.86
  -1  13  15    0.77    3.93
  -1 -13 -15    9.35    4.15
   1  13 -15    5.33    2.11
  -1 -13 -15    7.05    2.79
  -1  13  15   10.41    4.27
   1 -13  15    8.53    2.17
  -1 -13  15    6.98    4.04
  -1  13 -15    3.03    2.97
   1  13  15    7.20    2.19
   1 -13 -15    5.91    2.80
   1 -13 -15    8.38    4.50
  -1 -13  15    7.18    2.37
   1  13  15    6.32    2.72
   1 -14  15    6.78    2.61
   1  14 -15    4.80    4.71
  -1  14  15   11.11    2.53
  -1 -14 -15    6.93    2.66
   1  14 -15    8.32    2.05
  -1 -14 -15    6.28    2.76
  -1  14  15    8.24    2.67
   1 -14  15    6.83    1.32
  -1 -14  15    5.62    4.03
  -1  14 -15    5.65    3.01
   1  14  15    7.30    2.21
   1 -14 -15    6.16    2.88
  -1  14 -15    4.84    1.89
   1 -14 -15    5.30    4.44
  -1 -14  15    8.33    2.28
   1  14  15   12.06    4.37
   1 -15  15    2.12    2.66
   1  15 -15    6.66    2.92
  -1  15  15    5.97    3.89
  -1 -15 -15    3.32    2.59
   1  15 -15    3.40    1.93
  -1 -15 -15    1.95    4.47
  -1  15  15    3.67    2.67
   1 -15  15    4.95    2.03
  -1 -15  15    6.81    2.52
  -1  15 -15    2.12    4.99
   1  15  15    3.92    3.61
   1 -15 -15    2.28    4.65
  -1  15 -15    2.00    1.10
   1 -15 -15    3.87    4.33
  -1 -15  15    0.78    2.17
   1  15  15    4.12    2.68
   1 -16  15   51.44    3.39
   1  16 -15   49.85    5.78
  -1  16  15   50.83    4.76
  -1 -16 -15   49.92    5.22
   1  16 -15   46.99    2.56
  -1 -16 -15   56.02    5.72
  -1  16  15   54.01    5.28
   1 -16  15   58.45    2.79
  -1 -16  15   51.93    3.31
  -1  16 -15   53.06    3.77
   1  16  15   52.28    2.96
   1 -16 -15   50.23    5.59
   1 -16 -15   47.37    3.58
  -1 -16  15   58.33    3.19
   1  16  15   53.67    5.28
   1 -17  15    2.85    2.73
   1  17 -15   -0.86    3.07
  -1  17  15    1.05    2.49
  -1 -17 -15    1.22    4.31
   1  17 -15    0.93    1.83
  -1 -17 -15    3.24    4.78
  -1  17  15    3.01    2.70
   1 -17  15    1.89    1.83
  -1 -17  15    3.77    2.61
  -1  17 -15   -1.09    4.91
   1  17  15    2.33    3.68
   1 -17 -15    0.37    4.69
  -1  17 -15    1.72    1.56
   1 -17 -15   -1.00    2.82
  -1 -17  15    0.18    2.18
   1  17  15    5.32    2.64
   1 -18  15    2.57    2.86
   1  18 -15    3.22    4.96
  -1  18  15    0.83    4.12
  -1 -18 -15    7.21    2.78
   1  18 -15    3.14    1.81
  -1 -18 -15    3.01    2.82
  -1  18  15    5.24    4.31
   1 -18  15    3.95    1.83
  -1 -18  15    2.35    2.80
  -1  18 -15    2.62    3.28
   1  18  15    2.63    3.77
   1 -18 -15    2.41    4.85
  -1  18 -15    4.97    1.61
   1 -18 -15    4.35    2.75
  -1 -18  15    4.96    2.13
   1  18  15    2.85    4.30
   1 -19  15    8.77    3.00
   1  19 -15    4.71    3.30
  -1  19  15    8.42    2.72
  -1 -19 -15    5.74    2.89
   1  19 -15    5.32    1.79
  -1 -19 -15    6.82    3.00
  -1  19  15   11.17    4.35
   1 -19  15    8.11    1.67
  -1 -19  15    5.90    2.98
  -1  19 -15    9.08    5.31
   1  19  15    7.83    3.94
   1 -19 -15    6.41    3.13
   1 -19 -15    6.29    4.53
  -1 -19  15   11.24    2.15
   1  19  15   10.02    4.50
   1 -20  15    1.74    2.78
   1  20 -15    0.17    5.11
  -1  20  15    1.09    2.66
  -1 -20 -15    2.39    2.85
  -1  20  15    2.93    2.66
  -1 -20  15   -0.92    2.80
  -1  20 -15    6.11    5.35
   1  20  15    0.67    2.48
   1 -20 -15    5.92    2.99
   1 -20 -15   -8.61    5.12
   1  20  15    4.51    2.69
   1 -21  15    3.17    2.94
   1  21 -15    3.16    3.37
  -1  21  15    4.60    4.54
  -1 -21 -15    1.77    4.60
  -1 -21 -15   -3.44    6.01
  -1  21  15    1.27    2.70
  -1 -21  15   -1.60    2.92
  -1  21 -15   -4.02    3.46
   1  21  15    2.99    4.03
   1 -21 -15    2.15    3.23
   1 -21 -15   -4.51    3.44
   1  21  15    5.59    4.32
   1 -22  15   10.62    3.21
   1  22 -15    6.69    3.72
  -1  22  15    8.53    3.01
  -1 -22 -15    6.54    5.10
  -1 -22 -15   16.60    3.52
  -1  22  15    9.89    4.57
  -1 -22  15   10.74    3.07
  -1  22 -15    4.96    5.87
   1  22  15   10.96    2.62
   1 -22 -15    8.00    3.44
   1 -22 -15   12.48    3.23
   1  22  15   13.13    4.56
   1  23 -15    4.87    5.70
  -1  23  15    3.05    2.94
  -1 -23 -15    0.51    4.18
  -1 -23 -15   -6.05    4.99
  -1  23  15    0.31    4.32
  -1 -23  15    0.64    3.00
  -1  23 -15   -2.13    5.72
   1  23  15    2.72    4.15
   1 -23 -15   -0.81    3.33
   1 -23 -15   -4.09    4.71
   1  23  15    1.80    2.72
   1   0 -16   18.33    2.60
  -1   0 -16   14.69    4.32
  -1   0  16   18.90    4.48
   1   0  16   22.93    4.25
   1  -1  16    0.39    2.18
  -1   1  16   -4.72    2.59
   1  -1  16   -6.64    3.83
  -1  -1  16   -7.65    4.03
   1   1  16   -6.29    4.01
   1  -2  16   -1.73    2.18
  -1   2  16    2.79    2.26
  -1  -2 -16    1.05    2.38
   1   2 -16   -6.79    3.34
  -1   2  16   -7.27    2.62
   1  -2  16   -1.89    3.63
  -1  -2  16   -2.27    3.74
  -1   2 -16   -0.61    2.58
   1  -2 -16   -2.46    2.55
  -1  -2  16   -5.27    2.40
   1   2  16   -5.56    2.44
  -1   3  16   54.43    2.99
   1   3 -16   57.10    3.49
  -1  -3 -16   63.07    5.13
   1   3 -16   51.03    2.70
  -1   3  16   38.48    5.31
   1  -3  16   51.36    2.92
  -1  -3  16   51.71    2.98
  -1   3 -16   58.23    3.38
   1  -3 -16   54.73    3.40
   1  -3 -16   48.52    3.17
  -1   3 -16   45.79    4.22
  -1  -3  16   54.37    3.04
   1   3  16   53.26    3.37
   1  -4  16   71.50    4.77
  -1   4  16   76.22    3.34
   1   4 -16   72.36    3.89
  -1  -4 -16   69.26    5.25
   1   4 -16   70.78    4.36
  -1  -4 -16   65.75    3.67
  -1   4  16   76.53    5.84
   1  -4  16   72.76    3.06
  -1  -4  16   74.76    3.26
  -1   4 -16   72.90    3.75
   1  -4 -16   72.66    5.51
  -1   4 -16   71.72    2.88
  -1  -4  16   75.30    3.31
   1   4  16   80.78    5.57
   1  -5  16    5.89    3.78
  -1   5  16    2.33    2.31
   1   5 -16    0.47    2.80
  -1  -5 -16   -1.77    2.47
   1   5 -16   -0.06    3.15
  -1  -5 -16   10.12    4.70
  -1   5  16    5.90    2.91
   1  -5  16    1.30    2.12
  -1  -5  16   -0.58    2.32
   1  -5 -16    0.63    4.33
  -1   5 -16    6.86    2.98
   1  -5 -16    8.64    2.79
  -1  -5  16    9.33    3.68
   1   5  16    6.99    4.53
   1  -6  16   27.18    2.61
  -1   6  16   28.64    2.64
   1   6 -16   27.90    3.05
  -1  -6 -16   25.93    2.82
   1   6 -16   27.99    3.42
  -1   6  16   26.09    5.29
   1  -6  16   22.34    2.46
  -1  -6  16   27.31    4.25
   1   6  16   26.97    3.68
  -1   6 -16   29.12    2.94
   1  -6 -16   27.06    3.06
  -1   6 -16   26.80    3.26
   1  -6 -16   26.47    3.23
  -1  -6  16   29.64    4.02
   1   6  16   23.37    3.28
   1  -7  16   -0.48    2.32
  -1   7  16    0.28    2.36
   1   7 -16    1.76    2.75
  -1  -7 -16   -2.26    3.91
   1   7 -16    1.67    2.86
  -1  -7 -16   -9.42    5.07
  -1   7  16    9.28    2.91
   1  -7  16    5.76    3.22
  -1  -7  16    4.91    3.86
   1   7  16   10.54    3.51
  -1   7 -16    0.20    2.72
   1  -7 -16    0.04    2.77
  -1   7 -16    2.24    2.69
   1  -7 -16   -2.76    2.83
  -1  -7  16    7.48    3.33
   1   7  16    8.54    4.61
   1  -8  16   16.41    2.55
  -1   8  16   12.73    2.61
   1   8 -16   14.49    3.02
  -1  -8 -16   15.36    2.65
   1   8 -16   15.70    1.80
  -1  -8 -16   14.90    3.10
  -1   8  16   10.36    4.93
   1  -8  16   11.83    3.16
  -1  -8  16   16.24    4.18
   1   8  16   15.17    3.57
  -1   8 -16   13.84    3.02
   1  -8 -16   14.40    4.53
  -1   8 -16   16.94    2.70
   1  -8 -16   12.81    4.85
  -1  -8  16   11.77    3.38
   1   8  16   11.17    3.01
   1  -9  16   16.77    4.41
  -1   9  16   14.84    2.66
   1   9 -16    9.64    5.18
   1   9 -16   17.55    2.71
  -1  -9 -16   17.31    3.11
  -1   9  16   15.76    2.96
   1  -9  16   19.99    2.97
  -1  -9  16   18.51    2.75
  -1   9 -16   19.29    3.03
   1  -9 -16   17.68    4.85
  -1   9 -16   18.97    2.61
   1  -9 -16   15.70    4.81
  -1  -9  16   17.85    1.99
   1   9  16   16.03    4.84
   1 -10  16   93.50    5.63
  -1  10  16   88.41    5.65
  -1 -10 -16   88.53    5.82
   1  10 -16   86.68    3.72
  -1 -10 -16   89.33    4.22
  -1  10  16   92.79    6.06
   1 -10  16   92.12    2.84
  -1 -10  16   85.88    3.82
  -1  10 -16   91.83    6.29
   1  10  16   98.52    5.11
   1 -10 -16   89.52    4.21
  -1  10 -16   89.14    3.50
   1 -10 -16   96.17    6.12
  -1 -10  16   88.72    2.85
   1  10  16   99.07    6.28
   1 -11  16   47.84    4.83
   1  11 -16   45.31    5.97
  -1 -11 -16   49.20    3.31
   1  11 -16   45.22    2.99
  -1 -11 -16   46.10    3.57
  -1  11  16   48.16    3.43
   1 -11  16   52.19    3.19
  -1 -11  16   49.88    3.18
  -1  11 -16   43.93    5.90
   1  11  16   46.86    2.86
   1 -11 -16   48.02    3.54
  -1  11 -16   49.07    2.85
   1 -11 -16   50.30    5.34
  -1 -11  16   51.65    3.34
   1  11  16   49.20    3.56
   1 -12  16   81.47    5.61
   1  12 -16   83.44    4.36
  -1  12  16   85.57    3.70
  -1 -12 -16   84.75    4.02
   1  12 -16   88.03    3.55
  -1 -12 -16   86.75    4.19
  -1  12  16   92.78    5.98
   1 -12  16   91.74    3.76
  -1 -12  16   82.44    5.62
  -1  12 -16   85.43    4.41
   1  12  16   86.45    3.42
   1 -12 -16   87.19    6.24
  -1  12 -16   82.41    3.28
   1 -12 -16   87.35    4.04
  -1 -12  16   88.50    3.80
   1  12  16   85.71    6.09
   1 -13  16   -5.86    4.20
   1  13 -16  -12.19    4.86
  -1  13  16    0.54    2.40
  -1 -13 -16   -3.04    4.51
   1  13 -16    2.13    2.16
  -1 -13 -16    6.24    2.89
   1 -13  16   -0.72    1.51
  -1  13  16    0.60    2.82
  -1 -13  16    3.25    4.31
  -1  13 -16    1.89    3.00
   1  13  16   -0.29    3.74
   1 -13 -16   -5.06    4.64
  -1  13 -16    2.14    2.05
   1 -13 -16   -1.23    2.87
  -1 -13  16    1.20    2.60
   1  13  16   -2.35    2.88
   1 -14  16   43.38    4.97
   1  14 -16   41.41    5.74
  -1  14  16   38.19    4.66
  -1 -14 -16   47.03    5.17
   1  14 -16   40.14    2.78
  -1 -14 -16   46.51    3.78
  -1  14  16   53.21    5.53
   1 -14  16   48.79    3.17
  -1 -14  16   39.86    5.06
  -1  14 -16   41.50    5.82
   1  14  16   36.48    4.27
   1 -14 -16   37.01    5.47
  -1  14 -16   40.58    2.56
   1 -14 -16   47.11    5.80
  -1 -14  16   51.39    3.40
   1  14  16   47.40    5.41
   1 -15  16    8.73    4.51
   1  15 -16    6.14    3.26
  -1  15  16    8.19    2.69
  -1 -15 -16   11.06    2.83
   1  15 -16   11.96    2.24
  -1 -15 -16    8.94    3.24
  -1  15  16    7.60    3.08
   1 -15  16   10.51    2.39
  -1 -15  16    4.38    4.51
  -1  15 -16   12.47    3.26
   1  15  16    4.96    2.34
   1 -15 -16   12.75    3.06
  -1  15 -16   10.38    2.08
   1 -15 -16   10.98    5.04
  -1 -15  16    8.77    2.63
   1  15  16   10.02    3.03
   1 -16  16    0.66    4.48
   1  16 -16    6.80    4.99
  -1  16  16    2.32    2.54
  -1 -16 -16    0.50    2.77
   1  16 -16    3.55    2.08
  -1 -16 -16    1.02    3.00
   1 -16  16    3.71    2.17
  -1  16  16    3.98    4.60
  -1 -16  16    3.57    4.45
  -1  16 -16    1.75    5.07
   1  16  16    1.03    3.71
   1 -16 -16    7.27    3.05
  -1  16 -16    0.69    1.85
   1 -16 -16   -1.96    4.71
  -1 -16  16    1.47    2.30
   1  16  16   -0.51    4.59
   1 -17  16    0.72    4.46
   1  17 -16    0.31    3.22
  -1  17  16    1.68    4.09
  -1 -17 -16   -1.44    4.54
   1  17 -16    1.71    1.91
  -1 -17 -16    6.22    4.92
  -1  17  16   -1.79    4.46
   1 -17  16    0.93    2.01
  -1 -17  16   -2.57    4.54
  -1  17 -16    4.08    3.24
   1  17  16    0.03    4.28
   1 -17 -16    2.60    4.78
  -1  17 -16    0.30    1.76
   1 -17 -16    3.41    4.71
  -1 -17  16    1.47    2.32
   1  17  16   -1.82    4.50
   1 -18  16    1.67    4.53
   1  18 -16    4.15    5.14
  -1  18  16   -0.15    2.59
  -1 -18 -16    0.54    4.58
   1  18 -16    2.96    1.92
  -1 -18 -16   -4.31    5.09
  -1  18  16   -2.26    2.78
   1 -18  16    0.35    1.95
  -1 -18  16   -0.88    4.48
  -1  18 -16   -3.98    5.33
   1  18  16   -1.02    2.40
   1 -18 -16   -8.00    4.98
   1 -18 -16   -8.25    4.98
  -1 -18  16   -0.21    2.24
   1  18  16   -0.63    2.83
   1 -19  16    6.37    4.78
   1  19 -16    9.27    5.42
  -1  19  16    2.89    4.54
  -1 -19 -16    3.42    4.84
  -1  19  16    6.76    4.92
  -1 -19  16   13.59    4.61
  -1  19 -16    2.64    3.50
   1  19  16    3.69    4.12
   1 -19 -16    4.03    5.11
  -1 -19  16    3.24    2.37
   1  19  16    7.02    4.69
   1 -20  16   10.79    5.16
   1  20 -16    6.82    3.67
  -1  20  16   14.87    4.69
  -1 -20 -16   10.13    4.97
  -1 -20 -16   11.76    3.86
  -1  20  16   10.10    4.82
  -1 -20  16   15.30    4.97
  -1  20 -16   16.63    5.70
   1  20  16    8.27    4.33
   1 -20 -16   10.34    5.33
   1 -20 -16   17.43    3.51
   1  20  16   10.60    3.08
   1 -21  16   13.07    5.27
   1  21 -16   17.43    5.94
  -1  21  16   17.00    3.14
  -1 -21 -16   10.02    3.29
  -1 -21 -16    1.04    5.72
  -1  21  16   16.71    3.12
  -1 -21  16    9.35    5.21
  -1  21 -16   14.98    5.95
   1  21  16   12.20    2.77
   1 -21 -16   12.27    5.56
   1 -21 -16   12.52    5.40
   1  21  16   16.50    4.93
  -1   0  17    1.80    2.46
  -1   0 -17   -3.14    2.71
   1   0 -17   -1.35    2.80
   1   0 -17   -1.50    3.70
  -1   0 -17   -1.40    3.74
  -1   0  17   -5.56    4.19
   1   0  17   -2.38    2.48
  -1   1  17   19.85    2.64
   1   1 -17   18.64    3.06
  -1  -1 -17   18.94    4.60
   1   1 -17   17.29    3.87
  -1  -1 -17   15.25    2.61
  -1   1  17   16.11    4.57
   1  -1  17   16.25    2.61
  -1  -1  17   19.21    2.65
  -1   1 -17   17.89    2.94
   1  -1 -17   19.55    4.10
  -1   1 -17   15.16    2.43
  -1  -1  17   12.48    2.68
   1   1  17   14.87    4.39
  -1   2  17   24.17    2.74
   1   2 -17   23.92    3.23
  -1  -2 -17   22.20    4.55
   1   2 -17   19.26    2.41
  -1  -2 -17   21.59    4.33
  -1   2  17   20.38    2.97
   1  -2  17   20.22    2.57
  -1  -2  17   22.10    2.74
  -1   2 -17   24.42    3.08
   1  -2 -17   20.09    2.74
  -1   2 -17   16.18    3.80
  -1  -2  17   19.13    2.63
   1   2  17   21.91    4.49
   1  -3  17   -8.83    3.89
  -1   3  17    1.30    2.42
   1   3 -17   -2.11    2.88
  -1  -3 -17    4.26    2.49
   1   3 -17    1.31    3.24
  -1  -3 -17    1.66    2.49
  -1   3  17    0.83    2.72
   1  -3  17    1.77    3.54
  -1   3 -17    0.21    2.70
   1  -3 -17   -2.07    4.49
  -1   3 -17   -1.48    1.95
   1  -3 -17    0.50    4.06
  -1  -3  17    2.30    2.29
   1   3  17    2.99    4.33
   1  -4  17    9.20    2.42
  -1   4  17   10.62    2.46
   1   4 -17    9.66    3.00
  -1  -4 -17    8.84    2.77
   1   4 -17    8.53    2.04
  -1  -4 -17    4.78    2.69
  -1   4  17    7.84    4.58
   1  -4  17    9.19    3.50
  -1   4 -17    8.88    2.83
   1  -4 -17    5.45    2.91
  -1   4 -17    9.10    3.17
   1  -4 -17    5.89    2.68
  -1  -4  17    8.87    3.67
   1   4  17    5.19    2.74
   1  -5  17   13.89    2.51
  -1   5  17   11.19    2.62
   1   5 -17   15.87    3.04
  -1  -5 -17    9.66    4.41
   1   5 -17   13.09    2.08
  -1  -5 -17   14.98    4.56
  -1   5  17   16.33    2.92
   1  -5  17   13.35    3.53
  -1  -5  17    9.85    4.28
  -1   5 -17   14.49    2.98
   1  -5 -17   13.86    3.02
  -1   5 -17   11.64    3.09
   1  -5 -17   14.38    2.78
  -1  -5  17   14.59    3.66
   1   5  17   12.32    2.95
   1  -6  17    4.33    2.44
  -1   6  17    1.80    2.51
   1   6 -17    1.58    2.97
  -1  -6 -17    5.22    4.24
   1   6 -17    0.51    3.13
  -1  -6 -17    5.37    4.52
  -1   6  17    2.60    2.85
   1  -6  17    5.21    2.06
  -1  -6  17    3.28    4.19
   1   6  17   13.42    3.63
  -1   6 -17    7.04    2.83
   1  -6 -17    5.12    2.94
  -1   6 -17    5.94    1.75
   1  -6 -17    4.49    4.37
  -1  -6  17    6.30    3.46
   1   6  17    6.39    4.53
   1  -7  17    4.11    2.47
  -1   7  17    1.83    2.50
   1   7 -17    5.84    2.95
  -1  -7 -17    2.82    4.23
   1   7 -17    2.07    2.86
  -1  -7 -17    0.03    2.86
  -1   7  17   -0.15    4.67
   1  -7  17    4.13    1.95
  -1  -7  17    2.76    2.47
  -1   7 -17    6.24    2.87
   1  -7 -17    5.15    4.67
  -1   7 -17    4.16    1.70
   1  -7 -17    7.35    4.54
  -1  -7  17    7.86    3.28
   1   7  17    4.31    2.88
   1  -8  17   14.60    2.59
  -1   8  17   12.03    2.59
   1   8 -17   11.66    4.89
  -1  -8 -17   13.50    2.80
   1   8 -17   13.88    2.87
  -1  -8 -17   14.34    2.99
  -1   8  17   11.06    3.05
   1  -8  17   15.36    2.01
  -1  -8  17   13.02    2.69
  -1   8 -17   10.31    3.03
   1  -8 -17   14.35    4.89
  -1   8 -17   11.01    1.78
   1  -8 -17   11.12    2.93
  -1  -8  17   14.66    3.34
   1   8  17   13.69    3.04
   1  -9  17   14.08    4.44
  -1   9  17   12.61    4.39
   1   9 -17    9.29    2.72
  -1  -9 -17   11.68    3.05
  -1   9  17   12.95    4.98
   1  -9  17   10.54    3.05
  -1  -9  17    8.69    2.78
  -1   9 -17    7.18    4.98
   1  -9 -17    9.91    3.05
  -1   9 -17   11.28    1.70
   1  -9 -17    8.13    3.13
  -1  -9  17   10.78    2.03
   1   9  17    8.68    4.96
   1 -10  17   86.34    5.60
  -1  10  17   97.45    5.62
   1  10 -17   89.27    6.81
  -1 -10 -17   92.14    6.12
   1  10 -17   91.84    3.87
  -1 -10 -17   88.35    4.39
  -1  10  17   94.07    4.34
   1 -10  17   98.58    4.42
  -1 -10  17   91.11    3.96
   1  10  17   87.58    3.45
  -1  10 -17   74.79    6.58
   1 -10 -17   93.26    4.40
  -1  10 -17   94.34    2.78
   1 -10 -17   88.42    4.39
  -1 -10  17   89.76    3.14
   1  10  17   85.52    4.51
   1 -11  17   -0.59    4.30
  -1  11  17    6.13    2.59
   1  11 -17    5.09    3.21
  -1 -11 -17    6.70    2.89
   1  11 -17    3.53    2.72
  -1 -11 -17   13.11    5.47
  -1  11  17   13.93    5.23
   1 -11  17    9.42    2.01
  -1 -11  17   11.14    2.73
   1  11  17    8.23    2.29
  -1  11 -17    1.40    5.18
   1 -11 -17    8.98    2.95
  -1  11 -17    8.76    2.52
   1 -11 -17   12.23    3.21
  -1 -11  17    6.89    3.35
   1  11  17   18.28    5.11
   1 -12  17    4.72    4.22
   1  12 -17    2.75    3.16
  -1  12  17    0.27    2.52
  -1 -12 -17    1.41    2.86
   1  12 -17   -0.36    2.46
  -1 -12 -17   12.28    5.38
  -1  12  17    1.76    3.15
   1 -12  17    4.09    2.84
  -1 -12  17    1.45    4.40
  -1  12 -17   -0.30    3.05
   1  12  17    3.33    3.63
   1 -12 -17    3.80    4.91
  -1  12 -17    3.72    2.26
   1 -12 -17   -0.67    3.26
  -1 -12  17    1.35    3.00
   1  12  17   -2.93    3.15
   1  13 -17    1.76    5.18
  -1  13  17    1.39    4.12
  -1 -13 -17   -2.55    2.89
   1  13 -17    2.18    1.46
  -1 -13 -17    0.54    5.27
  -1  13  17    0.94    4.84
   1 -13  17    2.07    2.63
  -1 -13  17    2.12    4.42
  -1  13 -17   -3.75    5.07
   1  13  17   -5.38    3.67
   1 -13 -17    9.15    4.96
  -1  13 -17    1.20    2.26
   1 -13 -17    3.10    3.12
  -1 -13  17   -1.00    2.71
   1  13  17   -1.41    4.74
   1 -14  17    1.50    4.48
   1  14 -17    0.22    3.23
  -1  14  17   -2.80    4.24
  -1 -14 -17    1.73    4.67
   1  14 -17    1.76    2.35
  -1 -14 -17    2.55    3.13
   1 -14  17    1.56    2.54
  -1  14  17   -1.07    3.01
  -1 -14  17    4.43    4.64
  -1  14 -17    3.61    3.17
   1  14  17    5.64    2.34
   1 -14 -17    5.26    4.85
  -1  14 -17    3.85    2.13
   1 -14 -17    4.58    3.03
  -1 -14  17    1.32    2.59
   1  14  17    4.61    2.97
   1 -15  17   -0.72    4.67
   1  15 -17   -2.15    5.40
  -1  15  17    7.08    2.67
  -1 -15 -17    8.10    4.72
   1  15 -17    3.06    1.47
  -1 -15 -17    6.56    3.25
  -1  15  17    3.20    4.89
   1 -15  17    7.37    1.55
  -1 -15  17   10.57    4.64
  -1  15 -17    1.38    3.44
   1  15  17    3.63    3.97
   1 -15 -17    8.61    5.08
  -1  15 -17    4.49    2.12
   1 -15 -17    5.87    3.15
  -1 -15  17    6.62    2.63
   1  15  17    6.67    4.87
   1 -16  17   29.50    5.08
   1  16 -17   27.37    3.70
  -1  16  17   18.59    4.66
  -1 -16 -17   25.57    5.15
   1  16 -17   21.31    2.57
  -1 -16 -17   19.61    3.58
  -1  16  17   18.53    3.45
   1 -16  17   24.84    2.77
  -1 -16  17   22.68    4.95
  -1  16 -17   23.91    5.88
   1  16  17   20.49    4.27
   1 -16 -17   22.67    3.46
  -1  16 -17   19.74    2.30
   1 -16 -17   17.29    3.64
  -1 -16  17   23.51    2.88
   1  16  17   21.30    3.42
   1 -17  17   -4.32    4.87
   1  17 -17    5.81    5.63
  -1  17  17    4.61    2.74
  -1 -17 -17    1.60    3.04
   1  17 -17    1.81    2.24
  -1  17  17    7.18    5.26
   1 -17  17    4.70    2.43
  -1 -17  17    5.30    4.81
  -1  17 -17    5.00    3.42
   1  17  17    0.77    2.50
   1 -17 -17    2.06    3.22
  -1  17 -17    3.68    1.99
  -1 -17  17    4.85    2.63
   1  17  17    9.90    4.97
   1 -18  17   -1.22    4.98
   1  18 -17    1.50    3.44
  -1  18  17   -2.19    4.60
  -1 -18 -17    1.06    3.04
   1  18 -17    1.79    2.15
  -1 -18 -17  -12.52    6.42
  -1  18  17   10.03    4.85
   1 -18  17    1.20    2.21
  -1 -18  17   -0.23    4.87
  -1  18 -17   -0.89    3.49
   1  18  17    0.28    4.14
   1 -18 -17   -0.78    3.25
   1 -18 -17    4.07    6.04
  -1 -18  17    0.89    2.59
   1  18  17    1.64    3.14
   1 -19  17   37.04    5.77
   1  19 -17   36.43    6.52
  -1  19  17   38.65    3.48
  -1 -19 -17   40.23    3.66
  -1 -19 -17   22.18    7.05
  -1  19  17   34.72    3.62
  -1 -19  17   38.67    5.55
  -1  19 -17   29.84    6.39
   1  19  17   37.34    3.09
   1 -19 -17   35.37    3.94
   1 -19 -17   32.18    6.48
   1  19  17   32.74    5.58
   1 -20  17   -4.62    5.23
   1  20 -17    0.59    3.53
  -1  20  17   -2.98    4.73
  -1 -20 -17    3.12    4.30
  -1 -20 -17   -8.32    5.98
  -1  20  17    1.68    4.95
  -1 -20  17    3.89    5.00
  -1  20 -17   -0.22    3.61
   1  20  17   -1.13    4.20
   1 -20 -17    0.27    3.39
   1 -20 -17  -10.60    5.61
   1  20  17    1.91    3.10
   1   0  18  175.40    4.89
  -1   0 -18  176.54    5.77
   1   0 -18  178.03    6.10
   1   0 -18  181.70    7.17
  -1   0 -18  185.70    5.24
  -1   0  18  180.72    5.56
   1   0  18  189.46    7.53
   1  -1  18   11.56    2.48
   1   1 -18   11.58    3.23
  -1  -1 -18   12.82    2.96
   1   1 -18   10.67    2.50
  -1  -1 -18    9.85    4.28
  -1   1  18   11.03    4.77
   1  -1  18   14.39    4.28
   1   1  18    9.99    2.51
  -1   1 -18   10.39    3.08
   1  -1 -18   11.83    3.07
   1  -1 -18    7.82    2.60
  -1   1 -18   11.27    3.84
  -1  -1  18   11.30    2.79
   1   1  18    9.63    2.83
   1  -2  18   62.03    3.33
   1   2 -18   70.64    6.20
  -1  -2 -18   66.55    3.81
   1   2 -18   66.25    4.71
  -1  -2 -18   64.73    5.19
  -1   2  18   67.54    5.73
   1  -2  18   63.80    4.96
  -1  -2  18   66.55    3.48
   1   2  18   64.66    3.10
  -1   2 -18   65.49    4.04
   1  -2 -18   68.84    3.94
   1  -2 -18   71.77    5.16
  -1   2 -18   64.44    2.99
  -1  -2  18   66.83    3.40
   1   2  18   67.38    3.69
   1  -3  18    0.23    2.48
  -1  -3 -18    2.27    4.43
   1   3 -18    6.14    2.19
  -1  -3 -18    5.11    2.57
  -1   3  18    4.07    2.93
   1  -3  18    1.38    3.81
  -1  -3  18    0.04    2.49
   1   3  18    3.62    2.27
  -1   3 -18    2.94    4.73
   1  -3 -18    4.28    3.02
  -1   3 -18    3.64    3.43
   1  -3 -18    2.15    2.65
  -1  -3  18   -1.51    4.09
   1   3  18    2.51    2.87
   1  -4  18   -0.03    2.48
  -1   4  18    0.41    2.56
   1   4 -18    7.03    3.49
  -1  -4 -18    2.71    4.36
  -1   4  18    0.10    2.91
   1  -4  18    1.66    3.65
  -1  -4  18   -1.88    2.58
   1   4  18    1.18    2.26
  -1   4 -18    3.95    2.92
   1  -4 -18    3.40    3.00
  -1   4 -18    4.03    3.22
   1  -4 -18    1.13    2.71
  -1  -4  18    6.84    3.94
   1   4  18    6.76    4.74
   1  -5  18   27.36    4.50
  -1   5  18   28.63    2.85
   1   5 -18   26.39    3.49
  -1  -5 -18   26.72    5.00
   1   5 -18   25.25    3.67
  -1  -5 -18   20.80    5.10
  -1   5  18   22.51    5.49
   1  -5  18   25.19    4.08
  -1  -5  18   27.86    2.98
   1   5  18   31.56    4.02
  -1   5 -18   28.49    3.33
   1  -5 -18   35.50    5.47
  -1   5 -18   26.03    2.27
   1  -5 -18   24.96    4.99
  -1  -5  18   22.36    4.29
   1   5  18   16.43    5.41
   1  -6  18    4.59    4.13
  -1   6  18    7.58    2.67
   1   6 -18    9.98    3.25
  -1  -6 -18    5.95    2.86
   1   6 -18    7.65    2.05
  -1  -6 -18    6.37    3.12
  -1   6  18    9.42    3.33
   1  -6  18    9.10    3.87
  -1  -6  18   12.31    2.74
   1   6  18   16.47    3.98
  -1   6 -18    5.54    3.07
   1  -6 -18   10.00    5.13
  -1   6 -18   10.38    3.16
   1  -6 -18    0.57    5.00
  -1  -6  18   10.91    4.09
   1   6  18   11.00    3.20
   1  -7  18    0.52    4.10
  -1   7  18    1.57    2.62
   1   7 -18    4.30    3.14
  -1  -7 -18    7.80    2.72
   1   7 -18    5.18    1.90
  -1  -7 -18    1.17    3.16
  -1   7  18    8.43    3.26
   1  -7  18   10.93    3.84
  -1  -7  18    3.06    2.66
  -1   7 -18    5.35    3.00
   1  -7 -18    8.26    4.83
  -1   7 -18    3.01    3.07
   1  -7 -18    7.38    3.20
  -1  -7  18    8.64    4.07
   1   7  18   18.34    5.30
  -1   8  18    4.18    4.29
   1   8 -18   10.68    5.15
  -1  -8 -18    4.06    2.96
   1   8 -18    7.43    1.94
  -1  -8 -18   14.89    3.47
  -1   8  18   19.31    5.61
   1  -8  18   12.91    3.72
  -1  -8  18    6.31    2.76
  -1   8 -18    7.40    3.07
   1  -8 -18   10.60    5.03
  -1   8 -18    8.48    3.02
   1  -8 -18   13.06    3.37
  -1  -8  18   11.70    3.99
   1   8  18   17.43    5.33
   1  -9  18   15.24    4.81
  -1   9  18   23.85    4.66
   1   9 -18    6.37    5.81
  -1  -9 -18   26.86    5.00
   1   9 -18   23.36    3.18
  -1  -9 -18   23.99    5.86
  -1   9  18   17.27    3.69
   1  -9  18   27.36    2.34
  -1  -9  18   23.14    3.10
   1   9  18   22.86    2.53
  -1   9 -18   16.98    5.45
   1  -9 -18   25.12    3.39
  -1   9 -18   24.38    3.10
   1  -9 -18   19.71    5.68
  -1  -9  18   19.18    3.85
   1   9  18   20.50    3.47
   1 -10  18   13.15    4.65
  -1  10  18    5.14    4.75
   1  10 -18    1.96    5.62
  -1 -10 -18   18.80    4.97
   1  10 -18   12.84    3.00
  -1 -10 -18   17.67    5.62
  -1  10  18   16.82    5.33
   1 -10  18   15.28    3.31
  -1 -10  18   17.44    3.06
   1  10  18   14.40    2.52
  -1  10 -18   -1.72    5.62
   1 -10 -18   15.10    3.33
  -1  10 -18   18.35    2.86
   1 -10 -18    9.04    5.43
  -1 -10  18   18.30    2.24
   1  10  18   21.64    5.38
   1 -11  18   24.17    4.84
  -1  11  18   20.76    2.90
   1  11 -18   22.73    3.66
  -1 -11 -18   21.46    3.26
   1  11 -18   21.94    3.02
  -1 -11 -18   26.89    5.77
  -1  11  18   19.00    3.58
   1 -11  18   24.59    3.39
  -1 -11  18   19.51    5.00
   1  11  18   22.26    4.22
  -1  11 -18   22.88    3.52
   1 -11 -18   23.72    3.44
  -1  11 -18   21.49    2.84
   1 -11 -18   24.12    5.60
  -1 -11  18   20.98    3.43
   1  11  18   25.61    3.48
   1 -12  18   -4.74    4.61
  -1  12  18   -7.79    4.35
   1  12 -18   -2.02    5.48
  -1 -12 -18    2.48    3.00
   1  12 -18   -0.29    1.63
  -1 -12 -18    1.11    5.36
  -1  12  18    3.99    5.01
   1 -12  18    0.74    1.81
  -1 -12  18   -5.18    4.66
   1  12  18   -5.34    3.86
  -1  12 -18   -0.71    5.19
   1 -12 -18    3.91    3.22
  -1  12 -18   -0.29    2.42
  -1 -12  18    1.20    2.99
   1  12  18    5.53    4.97
   1 -13  18    4.01    4.62
  -1  13  18    9.29    4.26
   1  13 -18    6.07    5.64
  -1 -13 -18    6.76    3.11
   1  13 -18    7.70    2.61
  -1 -13 -18    1.31    5.68
  -1  13  18    2.86    3.24
   1 -13  18    6.56    2.93
  -1 -13  18    8.36    4.72
   1  13  18    4.75    2.50
  -1  13 -18    0.69    5.38
   1 -13 -18    1.10    5.27
  -1  13 -18    6.54    1.54
  -1 -13  18    3.46    2.93
   1  13  18    8.10    5.17
   1 -14  18   -3.49    4.62
   1  14 -18   -3.04    3.47
  -1  14  18   -1.62    2.79
  -1 -14 -18    3.13    4.84
   1  14 -18    0.14    2.50
  -1  14  18   -1.47    5.42
   1 -14  18    2.06    1.78
  -1 -14  18   -1.71    4.80
  -1  14 -18    1.96    3.42
   1  14  18   -0.66    3.94
   1 -14 -18    6.69    5.13
  -1  14 -18    1.97    2.33
  -1 -14  18   -0.20    2.95
   1  14  18    2.06    3.20
   1 -15  18    3.14    4.91
   1  15 -18    9.46    5.85
  -1  15  18    7.14    4.69
  -1 -15 -18    5.91    5.17
   1  15 -18    7.27    1.67
  -1  15  18    7.33    3.47
   1 -15  18    7.16    2.82
  -1 -15  18    6.15    4.96
  -1  15 -18   -0.39    5.57
   1  15  18    9.11    4.20
   1 -15 -18    6.21    5.30
  -1  15 -18    6.86    1.48
  -1 -15  18    7.11    2.92
   1  15  18    1.07    5.33
   1 -16  18    1.58    4.99
   1  16 -18    3.99    3.68
  -1  16  18    0.71    2.89
  -1 -16 -18    1.35    5.12
   1  16 -18    2.96    2.49
  -1 -16 -18    9.25    3.99
  -1  16  18    3.11    5.48
   1 -16  18    3.24    2.66
  -1 -16  18   -3.30    4.99
  -1  16 -18    2.43    3.52
   1  16  18    1.76    2.65
   1 -16 -18    0.67    5.36
  -1  16 -18    1.95    2.34
   1 -16 -18   18.95    6.17
  -1 -16  18    4.33    2.84
   1  16  18    6.52    3.35
   1 -17  18    5.50    5.26
   1  17 -18   14.22    5.86
  -1  17  18   11.65    4.77
  -1 -17 -18    7.56    5.24
   1  17 -18    4.06    1.60
  -1 -17 -18   -2.16    3.84
  -1  17  18    7.89    3.34
   1 -17  18    5.20    2.55
  -1 -17  18    2.46    5.09
  -1  17 -18   11.36    5.86
   1  17  18    4.42    4.36
   1 -17 -18    6.43    5.33
   1 -17 -18   -2.88    5.86
  -1 -17  18    5.63    2.83
   1  17  18   -0.60    5.37
   1 -18  18    2.32    5.21
   1  18 -18    0.40    3.65
  -1  18  18   -3.78    2.91
  -1 -18 -18    1.28    3.16
  -1 -18 -18   -6.35    3.65
  -1  18  18   -7.18    5.31
  -1 -18  18   -3.30    5.15
  -1  18 -18    3.23    3.63
   1  18  18    1.47    2.68
   1 -18 -18    0.77    3.46
   1 -18 -18   -6.03    3.59
  -1 -18  18   -0.03    2.83
   1  18  18   -1.33    3.22
   1   0 -19   -0.87    2.59
  -1   0 -19    1.56    2.49
  -1   0  19   -1.83    2.95
   1   0  19   -4.59    4.46
   1   1 -19    1.25    3.89
  -1  -1 -19   -2.44    4.34
  -1   1  19    2.33    3.09
   1  -1  19    2.83    2.82
   1  -1 -19    1.62    4.22
  -1   1 -19   -1.32    3.92
  -1  -1  19   -4.02    4.68
   1   1  19   -4.38    4.76
   1   2 -19   -1.33    2.34
  -1  -2 -19   -0.05    2.73
  -1   2  19   -6.33    4.94
   1  -2  19    1.27    2.69
   1   2  19    0.82    2.33
   1  -2 -19   -0.37    2.71
  -1   2 -19    1.26    2.27
  -1  -2  19   -3.72    4.48
   1   2  19   -6.59    4.69
   1  -3  19    1.10    4.03
  -1  -3 -19    3.76    2.93
   1   3 -19    1.50    3.63
  -1  -3 -19    1.01    4.45
  -1   3  19   -2.66    5.08
   1  -3  19    2.10    2.59
   1   3  19   -0.89    2.41
   1  -3 -19   -4.81    4.55
  -1   3 -19   -0.75    3.56
  -1  -3  19   -1.55    4.30
   1   3  19   -0.34    3.03
   1  -4  19   10.16    4.33
  -1  -4 -19   11.42    3.15
   1   4 -19   10.30    2.27
  -1  -4 -19    9.57    4.90
  -1   4  19    7.19    3.20
   1  -4  19   10.82    2.56
   1   4  19   10.21    2.49
  -1   4 -19    6.18    5.00
  -1   4 -19   13.15    2.26
   1  -4 -19    9.57    4.77
  -1  -4  19    8.73    4.38
   1   4  19   14.11    3.23
   1  -5  19   -5.26    4.07
   1   5 -19   -0.19    5.21
  -1  -5 -19    0.24    2.97
   1   5 -19    1.33    2.04
  -1  -5 -19   -3.92    2.95
  -1   5  19    0.06    3.12
   1  -5  19    0.57    2.36
  -1  -5  19   -2.61    4.48
   1   5  19    0.14    2.32
  -1   5 -19    1.47    3.01
  -1   5 -19    1.24    3.24
   1  -5 -19   -1.69    2.92
  -1  -5  19    0.89    4.02
   1   5  19    6.37    4.84
   1  -6  19    8.61    4.45
  -1   6  19   10.89    2.77
   1   6 -19    9.76    3.41
  -1  -6 -19    5.98    3.14
   1   6 -19    8.29    3.40
  -1  -6 -19    8.95    3.14
  -1   6  19   13.93    5.30
   1  -6  19   10.81    2.42
  -1  -6  19   10.61    4.72
   1   6  19    8.50    3.94
  -1   6 -19    7.70    3.27
   1  -6 -19    5.08    5.10
  -1   6 -19    9.69    3.37
   1  -6 -19   10.25    3.16
  -1  -6  19    7.35    4.08
   1   6  19    8.25    5.11
   1  -7  19   -2.23    4.43
  -1   7  19    0.58    2.68
   1   7 -19    0.15    3.30
  -1  -7 -19   -1.54    4.74
   1   7 -19    2.30    3.11
  -1  -7 -19    0.18    2.99
  -1   7  19   -2.25    5.06
   1  -7  19    1.48    3.54
  -1  -7  19   -2.67    4.51
  -1   7 -19    0.25    3.13
   1  -7 -19    1.55    3.10
  -1   7 -19    0.86    3.06
   1  -7 -19    0.30    4.80
  -1  -7  19   -0.64    3.69
   1   7  19   -0.14    3.12
   1  -8  19   -1.24    4.42
  -1   8  19    0.42    4.28
   1   8 -19    5.11    5.41
  -1  -8 -19    1.48    4.75
   1   8 -19    1.86    3.15
  -1  -8 -19    1.46    5.13
  -1   8  19    1.67    3.29
   1  -8  19    3.31    3.54
  -1  -8  19    2.26    4.63
  -1   8 -19    6.65    5.08
   1  -8 -19    1.42    3.18
  -1   8 -19    4.81    1.86
   1  -8 -19    2.21    5.37
  -1  -8  19    4.42    3.60
   1   8  19    0.70    3.21
   1  -9  19   -1.63    4.58
  -1   9  19   -0.58    4.35
   1   9 -19   -1.66    5.51
  -1  -9 -19    0.00    4.58
   1   9 -19   -1.43    1.90
  -1  -9 -19   -0.47    5.45
  -1   9  19    4.62    5.40
   1  -9  19    2.48    3.42
  -1  -9  19   -0.04    4.54
   1   9  19    3.89    2.44
  -1   9 -19   -1.72    5.18
   1  -9 -19   -0.25    3.24
  -1   9 -19    1.57    1.83
   1  -9 -19   -1.78    5.32
  -1  -9  19    2.49    3.56
   1   9  19    3.60    5.20
   1 -10  19    3.64    4.60
  -1  10  19    3.57    2.83
   1  10 -19    6.27    3.48
  -1 -10 -19    4.29    4.92
   1  10 -19    5.21    1.97
  -1 -10 -19   -0.58    5.90
  -1  10  19    6.51    3.60
   1 -10  19    6.39    2.19
  -1 -10  19    1.56    4.78
   1  10  19    7.18    2.50
  -1  10 -19    3.46    3.34
   1 -10 -19    8.09    3.30
  -1  10 -19    4.96    1.83
   1 -10 -19   -1.65    5.51
  -1 -10  19    4.44    2.21
   1  10  19   -1.84    3.48
   1 -11  19    4.72    4.66
  -1  11  19    2.94    2.73
   1  11 -19    4.75    3.44
  -1 -11 -19    5.37    3.05
   1  11 -19    3.48    1.85
  -1 -11 -19   -5.31    6.57
  -1  11  19    1.81    5.73
   1 -11  19    8.30    3.39
  -1 -11  19    3.76    4.81
   1  11  19    1.31    4.14
  -1  11 -19   -0.05    3.48
   1 -11 -19    1.38    3.36
  -1  11 -19    1.09    1.72
   1 -11 -19   -0.30    3.96
  -1 -11  19    4.43    2.27
   1  11  19    1.92    3.64
   1 -12  19   -3.84    4.81
  -1  12  19   -3.23    4.52
   1  12 -19    0.09    5.83
  -1 -12 -19    0.53    3.29
   1  12 -19    0.60    2.83
  -1  12  19    8.23    3.65
   1 -12  19    1.07    3.29
  -1 -12  19   -5.54    4.83
   1  12  19   -6.80    4.13
  -1  12 -19   -8.94    5.74
   1 -12 -19    1.07    5.49
  -1  12 -19    5.50    2.69
  -1 -12  19    0.49    3.32
   1  12  19    4.47    5.63
   1 -13  19   12.66    5.13
  -1  13  19   11.65    3.11
   1  13 -19   12.54    3.81
  -1 -13 -19   13.14    3.46
   1  13 -19   12.59    2.98
  -1  13  19   10.65    6.18
   1 -13  19   15.87    2.25
  -1 -13  19   13.92    5.28
   1  13  19   12.78    2.74
  -1  13 -19   11.55    3.75
   1 -13 -19    0.84    6.00
  -1  13 -19   10.65    2.78
   1 -13 -19    4.68    4.15
  -1 -13  19   11.99    3.44
   1  13  19   15.51    3.69
   1 -14  19   53.47    6.08
  -1  14  19   54.50    5.91
   1  14 -19   58.11    7.36
  -1 -14 -19   53.82    4.28
   1  14 -19   54.10    3.60
  -1 -14 -19   63.58    8.04
  -1  14  19   57.73    4.57
   1 -14  19   61.55    4.01
  -1 -14  19   61.30    6.22
   1  14  19   57.72    5.30
  -1  14 -19   50.60    6.99
   1 -14 -19   57.59    6.83
  -1  14 -19   53.65    3.61
   1 -14 -19   59.97    4.87
  -1 -14  19   63.10    3.99
   1  14  19   54.81    6.84
   1 -15  19   -7.56    5.27
  -1  15  19    1.52    5.10
   1  15 -19  -17.19    6.25
  -1 -15 -19   -7.08    5.40
  -1 -15 -19  -10.48    6.39
  -1  15  19    2.94    5.78
   1 -15  19    0.90    2.91
  -1 -15  19   -6.18    5.22
   1  15  19   -3.31    2.71
  -1  15 -19   -8.07    5.91
   1 -15 -19   -4.73    5.73
  -1  15 -19   -1.40    2.51
   1 -15 -19   -0.67    3.64
  -1 -15  19   -0.40    2.94
   1  15  19   -0.18    3.55
   1 -16  19   30.85    5.85
   1  16 -19   25.22    6.71
  -1 -16 -19   24.36    6.01
   1  16 -19   29.15    3.26
  -1 -16 -19   30.67    7.29
  -1  16  19   29.99    4.13
   1 -16  19   36.22    2.36
  -1 -16  19   31.18    5.74
   1  16  19   22.17    4.95
   1 -16 -19   28.31    6.33
  -1  16 -19   27.32    3.02
   1 -16 -19   30.05    7.08
  -1 -16  19   37.09    3.79
   1  16  19   28.09    6.32
  -1   0  20    3.34    2.87
   1   0 -20    2.34    3.22
   1   0 -20    3.28    4.38
  -1   0 -20    3.89    4.20
  -1   0  20    4.85    4.97
   1   0  20    6.72    2.98
  -1   1  20    8.43    2.89
   1   1 -20    9.20    3.35
   1   1 -20    9.83    2.68
  -1  -1 -20    8.88    4.52
  -1   1  20    7.79    3.18
   1  -1  20    9.67    2.93
  -1  -1  20    7.43    2.88
   1  -1 -20    8.18    3.45
   1  -1 -20    6.36    2.89
  -1   1 -20    7.74    2.60
  -1  -1  20    8.87    4.92
   1   1  20    8.52    2.99
   1  -2  20   -0.04    2.59
   1   2 -20   -0.71    3.26
   1   2 -20    4.17    3.94
  -1  -2 -20   -1.31    2.78
  -1   2  20    1.07    3.11
   1  -2  20   -1.89    2.78
  -1  -2  20    0.77    2.79
   1  -2 -20   -0.76    3.25
   1  -2 -20   -1.90    4.57
  -1   2 -20   -5.36    3.90
  -1  -2  20    3.21    4.55
   1   2  20    0.66    3.07
   1  -3  20    3.70    2.64
   1   3 -20   -1.11    2.38
  -1  -3 -20    0.15    4.65
  -1   3  20    1.60    5.15
   1  -3  20   -4.03    4.36
  -1  -3  20   -0.31    2.78
   1  -3 -20   -4.58    3.35
   1  -3 -20    2.45    4.66
  -1   3 -20   -0.94    2.35
  -1  -3  20   -3.75    4.58
   1   3  20   -2.77    5.08
   1  -4  20   17.92    2.96
   1   4 -20   17.58    4.15
  -1  -4 -20   19.89    5.14
  -1   4  20   17.84    5.87
   1  -4  20   20.50    4.64
  -1  -4  20   19.42    3.10
   1  -4 -20   17.81    3.63
  -1   4 -20   18.85    3.95
   1  -4 -20   16.28    3.33
  -1  -4  20   19.54    4.78
   1   4  20   16.84    5.75
   1  -5  20   22.77    2.95
   1   5 -20   17.95    3.99
  -1  -5 -20   13.16    3.42
  -1   5  20   22.45    3.75
   1  -5  20   18.48    2.97
  -1  -5  20   19.37    3.10
   1   5  20   17.08    2.80
  -1   5 -20   18.46    5.77
   1  -5 -20   18.04    3.74
  -1   5 -20   15.31    3.79
   1  -5 -20   14.31    3.57
  -1  -5  20   21.54    4.83
   1   5  20   21.10    3.71
   1  -6  20    9.31    2.88
  -1   6  20    6.09    2.93
   1   6 -20   11.46    3.79
  -1  -6 -20    9.58    5.28
   1   6 -20    9.86    2.34
  -1  -6 -20    4.69    3.60
  -1   6  20   11.83    3.83
   1  -6  20   13.56    2.75
  -1  -6  20    5.55    4.84
   1   6  20   14.32    4.41
  -1   6 -20   10.65    3.52
   1  -6 -20    9.51    3.41
  -1   6 -20    8.56    2.35
   1  -6 -20    5.95    5.93
  -1  -6  20   15.91    4.74
   1   6  20   14.54    3.64
   1  -7  20   -3.30    2.75
  -1   7  20   -3.31    2.69
   1   7 -20   -3.49    3.56
  -1  -7 -20    2.52    5.16
   1   7 -20    1.11    2.20
   1  -7  20    0.66    2.55
  -1  -7  20   -7.85    4.74
  -1   7 -20   -2.34    3.39
   1  -7 -20    2.25    3.24
  -1   7 -20   -0.67    2.16
  -1  -7  20    0.74    4.34
   1   7  20   10.72    5.50
   1  -8  20    0.29    2.81
   1   8 -20   -5.15    5.81
  -1  -8 -20    4.23    5.21
   1   8 -20    0.18    3.42
  -1   8  20    3.36    6.23
   1  -8  20    0.83    3.84
  -1  -8  20    2.29    4.77
  -1   8 -20   -7.39    5.59
   1  -8 -20    0.07    3.42
  -1   8 -20    2.23    3.37
   1  -8 -20    6.39    3.78
  -1  -8  20   -4.36    4.26
   1   8  20    1.30    5.82
   1  -9  20   44.44    3.56
   1   9 -20   24.47    7.25
  -1  -9 -20   46.78    4.06
   1   9 -20   46.84    3.97
  -1   9  20   37.71    4.51
   1  -9  20   49.43    4.48
  -1  -9  20   50.15    5.84
   1   9  20   50.37    3.37
  -1   9 -20   25.28    7.28
   1  -9 -20   51.66    6.94
  -1   9 -20   40.15    3.93
   1  -9 -20   29.41    4.88
  -1  -9  20   43.24    5.00
   1   9  20   46.13    4.29
  -1  10  20   81.55    4.07
   1  10 -20   66.26    5.12
  -1 -10 -20   73.18    4.71
   1  10 -20   77.76    4.48
  -1  10  20   92.17    7.86
   1 -10  20   88.90    5.14
   1  10  20   94.89    6.31
  -1  10 -20   75.71    5.03
   1 -10 -20   70.37    7.48
  -1  10 -20   79.47    4.30
   1 -10 -20   90.30    5.34
  -1 -10  20   78.50    3.51
   1  10  20   88.22    7.52
   1  11 -20   18.02    4.07
  -1 -11 -20   23.20    3.68
   1  11 -20   21.29    3.43
  -1 -11 -20   18.03    4.56
  -1  11  20   21.87    4.16
   1 -11  20   23.44    2.53
  -1  11 -20   22.60    4.08
   1 -11 -20   21.76    6.03
  -1  11 -20   26.37    3.30
   1 -11 -20   16.80    4.19
  -1 -11  20   22.11    2.58
   1  11  20   16.57    6.44
   1 -12  20   -6.25    5.11
  -1  12  20   -0.51    4.97
   1  12 -20   -2.57    5.98
  -1 -12 -20    4.00    3.36
   1  12 -20    4.86    3.03
  -1 -12 -20   -0.16    3.93
  -1  12  20   -1.71    5.79
   1 -12  20    1.34    3.41
  -1 -12  20   -6.38    5.22
   1  12  20   -0.50    2.81
  -1  12 -20   -2.36    5.94
   1 -12 -20    7.33    5.63
  -1  12 -20    2.32    2.92
   1 -12 -20   -0.91    3.77
  -1 -12  20   -1.23    3.39
   1  12  20   -0.03    3.57
   1 -13  20   -2.16    5.11
  -1  13  20   -0.43    3.08
   1  13 -20   -1.75    3.78
  -1 -13 -20   -1.59    3.51
   1  13 -20    1.26    2.99
  -1 -13 -20   -5.03    4.16
  -1  13  20   -1.59    3.87
   1 -13  20    3.15    3.54
  -1 -13  20   -4.75    5.25
   1  13  20   -1.33    4.39
  -1  13 -20   -0.16    3.68
   1 -13 -20   -4.42    5.81
  -1  13 -20    0.51    2.99
   1 -13 -20   -0.81    3.94
  -1 -13  20   -0.55    3.55
   1  13  20   -1.28    5.88
   1   0  21    1.68    2.63
  -1   0 -21    0.99    3.26
   1   0 -21   -4.60    3.00
  -1   0 -21   -7.15    4.65
  -1   0  21    5.48    5.43
   1   0  21    3.72    5.12
   1  -1  21    4.17    2.83
  -1   1  21    4.23    2.98
  -1  -1 -21    4.59    3.35
   1   1 -21    3.66    4.73
  -1  -1 -21    2.21    3.23
  -1   1  21   15.46    5.83
   1  -1  21    7.69    5.12
   1   1  21    1.45    2.82
  -1   1 -21    8.83    3.43
   1  -1 -21    7.57    3.12
  -1   1 -21    4.55    2.91
  -1  -1  21   13.64    5.39
   1   1  21   13.14    5.41
  -1   2  21   19.53    3.16
   1   2 -21   17.92    3.82
  -1  -2 -21   14.74    3.63
   1   2 -21   17.75    3.05
  -1  -2 -21   19.34    5.47
  -1   2  21   22.04    3.95
   1  -2  21   20.25    5.29
  -1   2 -21   18.71    3.70
   1  -2 -21   20.43    5.64
  -1   2 -21   25.71    4.64
  -1  -2  21   23.40    5.63
   1   2  21   17.93    3.70
   1   3 -21    8.53    3.70
  -1  -3 -21    7.25    3.59
   1   3 -21    7.56    4.58
  -1  -3 -21   15.99    5.68
  -1   3  21   14.42    3.79
   1  -3  21    8.63    5.00
  -1   3 -21    4.94    5.85
  -1   3 -21    8.06    2.75
   1  -3 -21   17.40    3.55
  -1  -3  21   12.73    3.29
   1   3  21   19.28    3.62
   1   4 -21    0.48    6.17
  -1  -4 -21    4.93    3.47
   1   4 -21    8.40    4.36
  -1  -4 -21   12.92    3.54
  -1   4  21   16.83    6.16
   1  -4  21    8.68    4.82
   1  -4 -21   13.19    3.54
  -1   4 -21    3.56    4.14
  -1  -4  21    3.47    3.22
   1   4  21    6.83    3.68
  -1  -5 -21    1.23    3.44
   1   5 -21    4.72    2.45
  -1  -5 -21    8.54    3.69
  -1   5  21   -3.79    5.98
   1  -5  21    4.41    4.55
  -1  -5  21    1.92    5.00
  -1   5 -21    3.40    2.43
   1  -5 -21    6.85    5.79
  -1  -5  21   -0.86    3.02
   1   5  21    2.52    5.80
   1  -6  21    4.08    4.89
  -1  -6 -21    3.30    3.33
   1   6 -21    3.12    3.80
  -1  -6 -21   -4.58    5.92
  -1   6  21   -3.95    6.01
   1  -6  21    0.67    4.37
  -1  -6  21    3.19    3.09
   1   6  21    2.04    2.69
  -1   6 -21    2.96    3.70
   1  -6 -21   15.32    5.66
  -1   6 -21    1.81    2.35
   1  -6 -21   -2.06    5.82
  -1  -6  21    2.76    4.58
   1   6  21   -4.97    5.76
   1  -7  21    8.61    5.21
  -1   7  21    6.74    3.19
   1   7 -21    9.52    3.89
  -1  -7 -21    8.06    3.60
   1   7 -21    7.66    3.86
  -1  -7 -21    0.42    7.48
  -1   7  21    9.64    3.83
   1  -7  21    5.80    4.45
  -1  -7  21    6.20    3.26
  -1   7 -21   10.79    3.76
   1  -7 -21   18.56    6.14
  -1   7 -21    8.27    3.75
   1  -7 -21    6.50    3.66
  -1  -7  21   11.45    4.54
   1   7  21   12.03    3.81
   1  -8  21   23.10    3.42
   1   8 -21   23.21    4.26
  -1  -8 -21   27.40    3.91
   1   8 -21   26.28    2.56
  -1  -8 -21   26.21    6.90
  -1   8  21   15.27    6.72
   1  -8  21   26.16    2.98
  -1  -8  21   23.61    3.51
  -1   8 -21   25.95    6.52
   1  -8 -21   27.26    6.36
  -1   8 -21   27.93    3.87
   1  -8 -21   25.60    4.07
  -1  -8  21   18.51    4.73
   1   8  21   23.09    4.14
   1  -9  21   -0.69    3.12
   1   9 -21   -9.31    6.44
  -1  -9 -21    0.15    3.51
   1   9 -21    0.25    2.22
  -1  -9 -21   -4.40    3.96
  -1   9  21    0.06    6.21
   1  -9  21    1.46    2.63
  -1  -9  21   -3.67    3.20
   1   9  21   -2.65    2.80
   1  -9 -21   -0.77    5.99
  -1   9 -21    3.90    3.26
   1  -9 -21   -7.34    3.95
  -1  -9  21   -2.88    4.42
   1   9  21    1.38    6.24
  -2   0   0 9820.80  731.31
   2   0   0 9760.51  729.12
   2   0   0 9999.00  760.18
  -2  -1   0 2454.86   69.85
  -2   1   0 2602.65   77.72
   2  -1   0 2730.23   82.21
   2   1   0 2787.80   86.30
  -2  -1   0 2435.82   74.97
   2  -1   0 2845.43   86.66
  -2   1   0 2368.90   72.56
   2  -2   0  237.95    3.31
   2   2   0  248.89    4.46
  -2  -2   0  239.82    3.51
   2  -2   0  251.23    3.34
   2   3   0 3027.60  102.23
  -2   3   0 3158.87  113.53
   2  -3   0 2970.49  107.25
   2   3   0 3237.53  109.61
  -2  -3   0 3020.46  105.10
   2  -3   0 3220.49  110.06
  -2   3   0 3161.47  107.39
  -2  -3   0 3165.27  111.92
  -2   4   0  369.10    6.23
   2  -4   0  374.25    7.54
   2   4   0  366.60    5.86
  -2  -4   0  347.42    5.57
   2  -4   0  351.21    5.31
  -2   4   0  361.77    5.13
  -2  -4   0  353.35    5.60
   2   5   0 3508.50  135.85
  -2   5   0 3583.97  146.17
   2  -5   0 3619.16  147.30
   2   5   0 3644.39  142.36
  -2  -5   0 3715.60  143.07
   2  -5   0 3559.56  133.19
  -2   5   0 3585.89  132.83
  -2  -5   0 3603.54  138.23
  -2   6   0  512.42   10.86
   2   6   0  505.75    9.16
   2  -6   0  497.43    8.93
   2  -6   0  491.68    7.35
  -2   6   0  511.11    7.29
  -2  -6   0  505.28    8.15
  -2   7   0  591.48   12.77
   2   7   0  604.76   11.50
   2  -7   0  590.31   10.99
   2  -7   0  620.31    9.79
  -2   7   0  593.70    8.92
  -2  -7   0  591.10    9.93
  -2   8   0   74.84    3.37
   2   8   0   73.76    1.84
   2  -8   0   72.61    3.25
   2  -8   0   70.69    1.21
  -2   8   0   71.98    1.34
  -2  -8   0   70.67    2.10
   2   8   0   74.54    1.57
  -2   9   0  399.94    7.28
   2   9   0  393.68    7.58
   2  -9   0  384.50    6.96
   2  -9   0  376.79    5.43
  -2   9   0  370.11    5.21
  -2  -9   0  388.86    6.59
  -2  10   0   34.66    1.98
   2  10   0   34.85    2.30
   2 -10   0   34.63    2.83
   2 -10   0   33.31    1.02
  -2  10   0   33.10    0.78
  -2 -10   0   34.18    1.07
  -2  11   0  194.72    5.28
   2  11   0  192.47    3.57
   2 -11   0  183.92    3.85
   2 -11   0  181.96    2.75
  -2  11   0  184.21    2.61
  -2 -11   0  185.18    3.36
  -2  12   0   14.52    2.81
   2  12   0   12.99    2.26
   2 -12   0   14.29    2.58
  -2  12   0   15.18    0.66
  -2 -12   0   13.71    1.32
   2  13   0   41.87    1.61
  -2  13   0   37.67    2.10
   2  13   0   42.09    1.72
   2 -13   0   42.20    2.01
  -2 -13   0   40.84    1.67
   2 -13   0   40.26    1.12
  -2 -13   0   41.87    1.51
  -2  13   0   42.18    0.87
   2  14   0  450.43    9.37
  -2  14   0  468.82   10.54
   2  14   0  462.03    9.70
   2 -14   0  444.15   10.17
  -2 -14   0  441.23    7.87
   2 -14   0  445.01    6.61
  -2 -14   0  438.38    7.01
  -2  14   0  463.37    6.69
   2  15   0  145.66    4.04
  -2  15   0  153.55    4.97
   2  15   0  153.79    3.28
   2 -15   0  147.77    3.55
  -2 -15   0  147.29    2.94
   2 -15   0  145.72    1.96
  -2 -15   0  151.90    2.80
  -2  15   0  151.09    2.30
   2  16   0  189.60    3.89
  -2  16   0  195.82    4.49
   2  16   0  200.69    5.07
   2 -16   0  193.32    5.67
  -2 -16   0  193.40    3.63
   2 -16   0  190.28    2.53
  -2 -16   0  190.89    3.31
  -2  16   0  196.43    2.68
   2  17   0   16.58    2.53
  -2  17   0   15.62    3.34
   2  17   0   18.77    1.67
   2 -17   0   16.80    2.01
  -2 -17   0   17.95    1.42
   2 -17   0   19.58    0.68
  -2 -17   0   20.85    1.32
  -2  17   0   16.57    0.89
   2  18   0   67.76    3.30
  -2  18   0   66.26    2.88
   2  18   0   70.30    3.47
   2 -18   0   66.45    4.05
  -2 -18   0   66.97    2.01
   2 -18   0   65.51    1.27
  -2 -18   0   66.84    1.75
  -2  18   0   64.49    1.19
   2  19   0  268.86    5.67
  -2  19   0  282.94    6.45
   2  19   0  282.80    5.88
   2 -19   0  275.28    6.25
  -2 -19   0  268.05    5.02
   2 -19   0  274.24    3.89
  -2 -19   0  274.47    4.71
  -2  19   0  284.90    4.15
   2  20   0   32.31    3.16
  -2  20   0   31.36    3.98
   2  20   0   39.29    3.31
  -2 -20   0   31.46    1.60
   2 -20   0   30.69    0.75
  -2 -20   0   31.33    1.44
  -2  21   0   13.72    2.35
   2  21   0   13.44    2.06
  -2  21   0   18.46    2.55
   2  21   0   17.22    2.01
  -2 -21   0   17.48    1.45
   2 -21   0   16.98    0.82
  -2  22   0  387.39   10.86
   2  22   0  386.99    8.47
  -2  22   0  411.42   11.59
   2  22   0  404.70   10.27
   2 -22   0  375.63    5.45
  -2 -22   0  383.45    7.22
   2 -22   0  399.51    5.57
  -2 -22   0  393.39    6.84
  -2  23   0  123.84    4.15
   2  23   0  130.18    5.13
  -2  23   0  125.70    4.30
   2  23   0  133.93    3.88
  -2 -23   0  124.79    3.35
   2 -23   0  123.39    1.68
  -2 -23   0  128.80    2.75
  -2  24   0  173.35    6.90
   2  24   0  174.82    4.71
   2  24   0  180.85    6.12
  -2  24   0  181.52    5.36
  -2 -24   0  175.14    3.73
  -2  25   0  284.64    7.37
   2  25   0  275.10    8.46
  -2  25   0  295.97    9.74
   2  25   0  284.35    6.66
  -2 -25   0  265.71    5.34
  -2 -25   0  292.27    5.14
  -2  26   0   10.78    4.49
   2  26   0   16.01    2.41
   2  26   0   14.55    3.77
  -2  26   0   13.09    2.85
  -2 -26   0   13.47    1.47
  -2 -26   0   12.02    1.39
  -2  27   0   11.41    2.79
   2  27   0   11.24    3.87
  -2  27   0    2.21    4.55
   2  27   0    7.17    2.37
  -2 -27   0    7.89    1.87
  -2 -27   0    8.97    1.54
  -2  28   0   59.04    5.29
   2  28   0   50.86    3.15
   2  28   0   49.35    4.67
  -2  28   0   52.52    3.61
  -2 -28   0   49.03    1.88
  -2 -28   0   51.27    1.83
  -2  29   0    1.81    2.91
   2  29   0    6.47    3.99
  -2  29   0   10.13    4.84
   2  29   0    4.23    3.83
  -2  30   0   43.83    5.60
   2  30   0   32.36    4.75
   2  30   0   35.62    4.63
  -2  30   0   35.55    3.49
  -2  31   0    6.61    3.29
   2  31   0    6.69    4.51
  -2  31   0    7.47    5.13
   2  31   0    9.31    4.31
   2   0   1   -0.30    0.71
  -2   0  -1    0.38    0.37
  -2   0   1    0.95    0.77
   2   0  -1    0.53    0.50
   2   0  -1   -0.67    0.76
  -2   0   1    1.31    0.77
  -2   0  -1    0.54    1.12
   2   0   1    0.60    1.15
   2  -1   1  413.91    5.96
   2   1  -1  403.12    5.74
   2   1  -1  417.55    6.18
  -2  -1  -1  417.75    6.14
   2  -1   1  400.55    6.27
  -2   1  -1  419.68    5.75
   2  -1  -1  402.92    5.76
   2  -1  -1  410.82    6.74
   2   2  -1  156.64    2.40
  -2   2   1  166.45    2.58
  -2  -2  -1  170.36    2.02
   2   2  -1  167.57    3.37
  -2  -2  -1  161.11    3.38
   2   2   1  166.56    2.18
   2  -2  -1  156.02    3.14
  -2   2  -1  168.39    2.20
  -2  -2   1  159.65    2.46
   2  -2  -1  166.06    3.06
   2   3  -1  390.07    6.11
  -2   3   1  407.57    7.77
  -2  -3  -1  417.71    5.96
   2   3  -1  420.49    7.53
  -2   3   1  401.81    6.34
  -2  -3  -1  401.39    6.38
   2   3   1  415.92    6.02
   2  -3  -1  381.04    7.18
  -2   3  -1  420.33    6.51
  -2   3  -1  428.91    6.28
  -2  -3   1  401.13    7.14
   2  -3  -1  403.27    6.72
   2   4  -1   47.36    1.85
  -2   4   1   50.28    1.82
  -2  -4  -1   49.42    1.64
   2  -4   1   51.22    1.77
   2  -4   1   49.50    1.22
   2   4  -1   50.69    2.35
  -2   4   1   48.08    1.09
  -2  -4  -1   49.40    2.54
  -2  -4   1   50.10    1.89
   2   4   1   47.86    1.68
   2  -4  -1   49.60    2.87
  -2   4  -1   54.91    2.79
  -2  -4   1   46.89    1.44
  -2   4  -1   52.15    1.55
   2  -4  -1   48.57    1.86
   2   4   1   51.89    2.59
   2   5  -1   18.36    1.70
  -2   5   1   20.32    2.69
  -2  -5  -1   19.79    1.56
   2  -5   1   17.73    2.51
   2   5  -1   19.70    1.89
   2  -5   1   18.29    0.95
  -2   5   1   19.00    0.78
  -2  -5  -1   17.64    2.06
  -2  -5   1   19.05    1.73
   2   5   1   17.59    1.65
   2  -5  -1   19.79    2.60
  -2   5  -1   19.88    2.58
  -2  -5   1   18.56    1.85
  -2   5  -1   19.69    0.94
   2  -5  -1   17.02    1.41
   2   5   1   20.22    2.10
   2   6  -1  349.58    5.42
  -2   6   1  364.03    7.80
  -2  -6  -1  366.86    5.57
   2  -6   1  355.05    7.48
   2  -6   1  370.29    4.87
  -2   6   1  343.69    4.77
  -2  -6  -1  351.66    6.49
   2   6   1  346.62    6.28
   2  -6  -1  362.11    6.39
  -2   6  -1  365.08    7.82
  -2  -6   1  367.94    5.64
  -2   6  -1  376.39    4.73
   2  -6  -1  345.08    5.46
   2   6   1  363.71    6.71
   2   7  -1   46.00    2.11
  -2   7   1   45.63    1.86
  -2  -7  -1   47.58    1.37
   2   7  -1   49.01    2.23
   2  -7   1   48.84    1.85
   2  -7   1   48.23    0.85
  -2   7   1   43.51    1.26
  -2  -7  -1   43.83    1.33
   2   7   1   47.41    1.41
   2  -7  -1   46.47    2.93
  -2   7  -1   46.17    1.89
  -2  -7   1   46.24    1.85
   2  -7  -1   45.82    0.94
  -2   7  -1   44.62    0.71
   2   7   1   47.31    2.12
  -2  -7   1   46.84    1.79
   2   8  -1   -0.03    0.99
  -2   8   1    0.58    2.40
  -2  -8  -1    0.58    0.99
   2   8  -1    1.24    1.09
   2  -8   1   -1.10    2.31
   2  -8   1    0.16    0.36
  -2   8   1   -0.08    0.83
  -2  -8  -1    0.13    0.88
   2   8   1   -0.94    1.69
   2  -8  -1   -0.12    2.39
  -2   8  -1   -0.80    1.45
  -2  -8   1    0.26    1.33
   2  -8  -1    0.29    0.90
  -2   8  -1   -0.02    0.36
   2   8   1    0.90    1.56
  -2  -8   1    0.08    1.27
   2   9  -1    2.58    1.08
  -2   9   1    2.64    1.48
  -2  -9  -1    1.09    1.03
   2   9  -1    4.36    1.84
   2  -9   1    3.17    2.36
   2  -9   1    2.70    0.41
  -2   9   1    0.78    0.77
  -2  -9  -1    2.67    1.45
   2   9   1   -0.28    1.81
  -2   9  -1    2.89    2.47
   2  -9  -1    2.81    1.43
  -2  -9   1    3.34    1.26
   2  -9  -1    2.94    0.86
  -2   9  -1    2.45    0.30
  -2  -9   1    2.74    1.20
   2   9   1    2.25    0.92
   2  10  -1    8.51    1.15
  -2  10   1    7.20    1.61
   2  10  -1    5.37    2.04
  -2 -10  -1    9.07    1.85
   2 -10   1    6.08    2.45
   2 -10   1    7.53    0.36
  -2  10   1    8.23    0.87
  -2 -10  -1    6.70    1.45
   2  10   1    7.83    1.95
  -2  10  -1    7.84    1.59
   2 -10  -1   10.60    2.53
  -2 -10   1    7.40    0.80
   2 -10  -1    8.07    0.90
  -2  10  -1    7.43    0.42
  -2 -10   1    7.70    1.20
   2  10   1    7.83    1.54
   2  11  -1   21.99    2.19
  -2  11   1   22.73    1.79
   2  11  -1   23.61    2.28
  -2 -11  -1   25.26    2.14
   2 -11   1   22.96    1.75
   2 -11   1   22.99    0.49
  -2  11   1   22.53    1.02
  -2 -11  -1   23.23    1.56
   2  11   1   24.25    2.26
  -2  11  -1   22.77    1.79
   2 -11  -1   21.43    2.81
  -2 -11   1   22.32    1.39
  -2 -11   1   23.27    1.35
  -2  11  -1   23.05    0.47
   2  11   1   22.67    1.08
   2  12  -1    3.11    1.95
  -2  12   1    4.20    1.66
   2  12  -1    4.79    2.15
  -2 -12  -1    4.50    1.22
   2 -12   1    2.65    1.55
   2 -12   1    3.98    0.34
  -2 -12  -1    7.48    1.50
   2  12   1    4.09    2.07
  -2  12  -1    2.35    2.66
   2 -12  -1    4.44    2.56
  -2 -12   1    3.72    1.17
  -2 -12   1    5.10    1.10
  -2  12  -1    4.08    0.33
   2  12   1    4.31    1.41
   2  13  -1  348.04    7.20
  -2  13   1  355.17    6.90
   2  13  -1  372.28    7.65
  -2 -13  -1  346.97    7.23
   2 -13   1  357.69    4.33
  -2 -13  -1  338.45    5.33
  -2  13   1  351.58    5.25
   2  13   1  353.46    6.33
  -2  13  -1  367.41    7.10
   2 -13  -1  351.17    6.78
  -2 -13   1  341.22    5.78
   2 -13  -1  352.56    5.39
  -2 -13   1  334.20    5.49
   2  13   1  349.16    6.34
  -2  13  -1  337.07    4.17
   2  14  -1   12.73    2.13
  -2  14   1    9.18    1.76
   2  14  -1    8.77    2.21
  -2 -14  -1    9.54    1.34
   2 -14   1    7.79    0.34
  -2 -14  -1    6.99    0.81
  -2  14   1    6.87    0.84
   2  14   1    7.65    1.33
  -2  14  -1   10.19    2.85
   2 -14  -1    5.54    1.65
  -2 -14   1    8.23    1.13
   2 -14  -1    7.52    0.81
  -2 -14   1    7.59    1.03
   2  14   1    7.09    0.90
  -2  15   1   -0.77    2.70
   2  15  -1    0.87    1.38
  -2 -15  -1    2.75    2.10
   2 -15   1    0.86    0.31
   2 -15   1    1.36    0.28
  -2 -15  -1    1.38    1.16
  -2  15   1    1.26    0.78
  -2  15  -1    1.04    1.57
   2  15   1    3.79    2.10
  -2  15  -1    0.87    1.75
   2 -15  -1    0.15    2.67
  -2 -15   1    1.25    1.05
   2 -15  -1    1.32    0.74
  -2 -15   1    1.69    0.94
   2  15   1    1.23    1.32
   2  16  -1  112.31    3.69
  -2  16   1  111.02    4.49
   2  16  -1  115.76    3.93
  -2 -16  -1  110.79    3.73
   2 -16   1  109.23    1.21
  -2 -16  -1  111.29    2.43
  -2  16   1  113.85    1.95
  -2  16  -1  111.55    3.04
   2  16   1  112.84    3.77
  -2  16  -1  106.94    4.59
   2 -16  -1  111.66    3.23
  -2 -16   1  112.79    2.29
   2 -16  -1  112.03    1.89
  -2 -16   1  111.04    2.11
   2  16   1  108.02    2.60
   2  17  -1   33.20    1.84
  -2  17   1   35.73    2.25
   2  17  -1   37.25    2.89
  -2 -17  -1   34.64    2.84
  -2 -17  -1   36.02    1.63
  -2  17   1   33.79    1.39
  -2  17  -1   31.03    3.24
   2  17   1   33.82    1.86
  -2  17  -1   35.32    2.34
   2 -17  -1   32.54    2.20
  -2 -17   1   34.38    1.40
   2 -17  -1   37.11    1.13
  -2 -17   1   37.69    1.32
   2  17   1   34.28    1.68
   2  18  -1   20.35    1.77
  -2  18   1   22.30    2.17
   2  18  -1   22.06    1.85
  -2 -18  -1   21.01    1.38
  -2  18   1   19.59    1.26
  -2  18  -1   18.85    2.02
   2  18   1   25.12    2.70
  -2  18  -1   21.38    3.56
   2 -18  -1   18.18    3.43
  -2 -18   1   19.43    1.34
   2 -18  -1   18.95    0.91
  -2 -18   1   20.31    1.16
   2  19  -1   92.08    4.02
  -2  19   1   93.34    4.77
   2  19  -1   91.00    4.10
  -2 -19  -1   91.12    2.32
  -2  19   1   90.51    1.79
  -2  19  -1   87.21    4.48
   2  19   1   89.03    3.93
  -2  19  -1   89.76    3.39
   2 -19  -1   86.74    3.30
  -2 -19   1   90.14    2.14
   2 -19  -1   89.70    1.98
  -2 -19   1   88.12    1.96
   2  20  -1   -0.20    2.86
  -2  20   1   -1.97    3.52
   2  20  -1   -5.38    2.97
  -2 -20  -1    1.63    1.43
  -2 -20  -1   -1.06    1.24
  -2  20   1    2.62    0.84
   2  20   1    1.03    1.68
  -2  20  -1    3.29    3.28
   2  20   1    1.79    1.74
  -2  20  -1    4.60    3.63
   2 -20  -1   -1.03    3.45
  -2 -20   1    2.91    1.12
   2 -20  -1    0.77    1.00
  -2 -20   1    1.31    0.96
   2  21  -1   57.46    2.60
  -2  21   1   56.02    2.96
   2  21  -1   58.38    2.52
  -2 -21  -1   55.49    2.08
  -2 -21  -1   64.03    2.25
  -2  21   1   55.99    1.37
   2  21   1   56.94    3.74
  -2  21  -1   56.77    2.92
   2  21   1   58.31    3.67
  -2  21  -1   60.94    3.12
   2 -21  -1   58.38    4.50
  -2 -21   1   55.26    1.74
   2 -21  -1   59.55    1.72
   2  22  -1    2.50    1.91
  -2  22   1    3.78    3.86
   2  22  -1    1.97    3.11
  -2 -22  -1    1.50    1.44
  -2 -22  -1    0.57    1.25
  -2  22   1    1.28    0.79
   2  22   1    5.11    2.99
  -2  22  -1    1.11    3.59
   2  22   1    1.68    1.84
  -2  22  -1    3.26    3.97
   2 -22  -1    6.16    2.23
  -2 -22   1    0.32    1.13
   2 -22  -1    1.68    0.98
  -2 -22   1    0.46    0.98
   2  23  -1   -0.24    3.20
  -2  23   1   -0.66    3.88
   2  23  -1    1.16    2.01
  -2 -23  -1    0.58    1.42
  -2 -23  -1   -0.38    1.43
   2  23   1   -0.79    3.08
  -2  23  -1    3.24    2.36
   2  23   1    1.51    3.08
  -2  23  -1    1.50    2.42
  -2 -23   1    2.63    1.49
   2 -23  -1   -0.15    0.71
  -2 -23   1   -0.81    1.45
  -2  24   1    4.49    2.45
   2  24  -1    5.20    2.09
  -2  24   1    0.37    2.56
   2  24  -1    1.37    3.32
  -2 -24  -1    3.70    1.48
  -2 -24  -1    1.87    1.52
   2  24   1    6.67    3.30
  -2  24  -1    1.12    3.96
   2  24   1    2.17    3.33
  -2  24  -1    6.44    4.23
   2 -24  -1    2.57    1.01
  -2 -24   1    2.93    1.13
   2 -24  -1    3.53    0.96
  -2 -24   1    3.88    1.15
  -2  25   1   27.73    4.53
   2  25  -1   27.11    3.82
  -2  25   1   25.37    4.64
   2  25  -1   26.50    3.79
  -2 -25  -1   21.26    1.72
  -2 -25  -1   23.08    1.64
   2  25   1   24.28    3.74
  -2  25  -1   30.22    4.62
   2  25   1   27.59    2.41
  -2  25  -1   26.49    3.00
  -2 -25   1   23.26    1.43
   2 -25  -1   23.62    1.07
  -2 -25   1   25.47    1.32
  -2  26   1   94.61    4.05
   2  26  -1   99.99    5.20
  -2  26   1   98.37    4.06
   2  26  -1   95.97    3.63
  -2 -26  -1   91.21    2.75
  -2 -26  -1  103.07    2.65
   2  26   1   93.74    5.12
  -2  26  -1  100.04    4.15
   2  26   1   96.83    4.98
  -2  26  -1   93.77    6.17
  -2 -26   1   93.37    2.24
   2 -26  -1   91.48    1.62
  -2  27   1    5.77    4.40
   2  27  -1    5.77    2.38
  -2  27   1    2.88    2.84
   2  27  -1    3.65    3.76
  -2 -27  -1    5.51    1.56
  -2 -27  -1    5.47    1.60
   2  27   1    4.01    3.68
  -2  27  -1    2.46    4.48
   2  27   1    6.62    2.26
  -2  27  -1    6.18    2.74
  -2 -27   1    5.32    1.10
  -2 -27   1    5.14    1.54
  -2  28   1   10.21    2.90
   2  28  -1   11.71    4.04
  -2  28   1    8.46    4.63
   2  28  -1    9.52    2.41
  -2 -28  -1    7.53    1.58
  -2 -28  -1    9.72    1.63
   2  28   1   14.46    3.91
  -2  28  -1    8.82    2.90
   2  28   1    5.17    3.85
  -2  28  -1   12.70    4.85
  -2  29   1    3.23    4.61
   2  29  -1    6.08    3.99
  -2  29   1    5.91    2.91
   2  29  -1    4.39    3.92
  -2  29  -1    4.51    4.68
   2  29   1    1.76    2.50
   2  29   1    0.63    2.45
  -2  29  -1    5.05    2.89
  -2  30   1   24.33    3.39
   2  30  -1   26.14    3.07
  -2  30   1   19.57    5.25
   2  30  -1   27.70    2.88
   2  30   1   27.71    4.57
  -2  30  -1   29.80    3.36
   2  30   1   31.01    4.39
  -2  30  -1   34.92    5.39
  -2  31   1   26.83    5.54
   2  31  -1   29.49    4.91
  -2  31   1   30.88    3.63
   2  31  -1   31.68    4.81
   2  31   1   29.64    3.14
  -2  31  -1   24.16    5.62
   2  31   1   31.70    2.97
  -2  31  -1   22.79    3.57
   2   0   2 4336.37  182.14
  -2   0  -2 4295.34  178.79
  -2   0   2 4273.38  183.48
   2   0  -2 4026.48  173.84
   2   0  -2 4281.92  181.65
  -2   0   2 4643.62  199.98
  -2   0  -2 4257.99  179.46
   2   0   2 4092.00  173.22
   2  -1   2   75.45    1.93
  -2  -1  -2   78.23    1.60
   2   1  -2   73.23    1.46
  -2   1   2   75.40    1.67
   2   1  -2   77.49    1.74
  -2  -1  -2   73.87    1.63
   2  -1   2   73.58    2.03
  -2   1  -2   76.24    1.84
   2   1   2   76.77    1.61
  -2  -1   2   74.94    2.13
   2  -1  -2   74.79    2.44
  -2  -1   2   73.11    1.59
   2  -1  -2   75.18    1.71
  -2   1  -2   72.41    1.32
   2   1   2   71.85    2.35
   2  -2   2    9.66    1.64
   2   2  -2   10.43    1.57
  -2  -2  -2   10.46    1.05
  -2   2   2    8.38    2.06
   2   2  -2    9.77    1.13
  -2   2   2   11.87    1.87
  -2  -2  -2    9.20    1.99
   2  -2   2    9.87    0.75
  -2   2  -2   11.18    1.58
  -2  -2   2   10.61    1.56
   2   2   2   10.88    1.12
   2  -2  -2   10.53    1.18
  -2  -2   2   10.67    1.79
   2  -2  -2   11.42    1.11
  -2   2  -2    8.91    0.60
   2   2   2    9.74    2.04
   2  -3   2    3.66    1.14
   2   3  -2    3.00    1.66
  -2   3   2    3.01    1.37
  -2  -3  -2    1.30    1.23
   2   3  -2    1.88    1.09
  -2   3   2    2.09    1.70
  -2  -3  -2    2.13    1.24
   2  -3   2    1.59    0.64
  -2   3  -2    3.09    1.13
  -2  -3   2    2.27    0.96
   2   3   2    1.93    1.21
   2  -3  -2    2.80    1.36
  -2  -3   2    2.12    1.04
   2  -3  -2    2.28    1.88
  -2   3  -2    2.08    0.90
   2   3   2    3.69    2.19
   2  -4   2   43.17    2.65
   2   4  -2   42.97    2.25
  -2   4   2   45.22    1.94
  -2  -4  -2   43.24    1.77
   2   4  -2   42.32    1.44
  -2   4   2   40.47    2.05
  -2  -4  -2   41.59    2.56
   2  -4   2   41.64    1.18
  -2   4  -2   46.25    2.61
  -2  -4   2   42.86    2.13
   2   4   2   43.11    1.83
   2  -4  -2   44.47    1.86
  -2  -4   2   41.11    2.13
   2  -4  -2   44.14    2.20
   2   4   2   42.97    2.70
   2   5  -2  116.53    2.17
  -2   5   2  116.11    2.72
  -2  -5  -2  115.58    2.63
   2   5  -2  117.70    2.85
  -2   5   2  117.32    2.02
  -2  -5  -2  114.53    3.25
  -2   5  -2  122.21    2.50
  -2  -5   2  115.85    2.95
   2   5   2  120.42    2.84
   2  -5  -2  117.28    3.89
  -2  -5   2  121.25    2.80
   2  -5  -2  113.81    1.99
   2   5   2  117.99    3.31
   2   6  -2   24.33    1.92
  -2   6   2   21.83    1.64
  -2  -6  -2   23.76    1.11
   2   6  -2   22.88    1.68
  -2   6   2   23.71    0.98
  -2  -6  -2   22.01    1.25
  -2   6  -2   23.82    1.48
  -2  -6   2   23.78    1.19
   2   6   2   24.06    1.13
   2  -6  -2   24.09    1.60
  -2   6  -2   24.57    1.56
  -2   6  -2   23.55    0.70
  -2  -6   2   22.67    1.02
   2  -6  -2   22.74    0.98
  -2   6  -2   21.87    0.58
   2   6   2   25.59    1.29
   2   7  -2  310.02    5.89
  -2   7   2  302.36    5.49
  -2  -7  -2  312.81    5.69
   2   7  -2  312.91    5.34
  -2   7   2  306.08    5.04
  -2  -7  -2  304.68    5.71
  -2  -7   2  309.44    4.92
  -2   7  -2  312.18    6.57
   2   7   2  312.15    5.76
   2  -7  -2  312.79    5.59
  -2   7  -2  314.63    6.89
  -2  -7   2  309.55    5.26
   2  -7  -2  300.50    5.02
  -2   7  -2  296.36    3.31
   2   7   2  300.46    5.75
   2   8  -2   74.06    1.82
  -2   8   2   74.38    2.25
  -2  -8  -2   76.16    1.81
   2   8  -2   73.03    1.98
  -2   8   2   73.42    1.87
  -2  -8  -2   68.76    2.37
  -2  -8   2   74.41    1.78
  -2   8  -2   75.06    2.10
   2   8   2   76.69    1.81
   2  -8  -2   74.12    3.33
  -2   8  -2   81.53    3.32
  -2  -8   2   76.35    2.01
   2  -8  -2   72.35    1.39
   2   8   2   74.03    1.76
   2   9  -2    8.25    1.16
  -2   9   2    9.38    2.54
  -2  -9  -2    6.11    1.82
  -2   9   2    7.62    1.13
  -2  -9  -2    5.54    1.64
  -2   9  -2    9.83    2.35
   2   9   2    8.37    1.17
   2  -9  -2    8.36    1.55
  -2   9  -2    8.15    2.47
  -2  -9   2    7.98    0.77
   2  -9  -2    7.67    1.20
   2   9   2    7.47    1.72
   2  10  -2    0.85    1.17
  -2  10   2    0.95    1.46
  -2 -10  -2    1.46    1.10
   2  10  -2    1.29    1.99
  -2  10   2    1.68    1.07
  -2 -10  -2    1.18    0.90
  -2  10  -2   -0.76    2.36
   2  10   2    2.84    1.88
   2 -10  -2   -0.29    1.51
  -2  10  -2   -1.98    2.47
  -2 -10   2    0.26    1.14
   2 -10  -2    1.44    0.68
   2  10   2    0.84    0.95
  -2 -10   2    0.74    1.11
   2  11  -2  306.66    6.32
  -2  11   2  293.50    7.07
  -2 -11  -2  304.94    5.35
   2  11  -2  305.60    6.47
  -2 -11  -2  289.17    4.79
  -2  11  -2  295.52    6.86
   2  11   2  303.99    5.33
   2 -11  -2  300.40    5.78
  -2  11  -2  297.49    7.11
  -2 -11   2  306.62    5.00
   2 -11  -2  292.53    5.68
   2  11   2  305.20    5.76
  -2 -11   2  297.49    4.89
   2  12  -2  289.95    5.21
  -2  12   2  305.82    7.22
  -2 -12  -2  296.92    5.26
   2  12  -2  300.05    5.36
  -2  12   2  286.63    5.07
  -2 -12  -2  279.15    5.53
  -2  12  -2  291.21    5.59
   2  12   2  306.68    5.41
   2 -12  -2  297.65    5.82
  -2  12  -2  302.27    5.79
  -2 -12   2  306.09    4.96
   2 -12  -2  286.45    4.78
   2  12   2  296.96    5.65
  -2 -12   2  282.83    4.63
   2  13  -2  150.51    4.08
  -2  13   2  164.55    4.96
  -2 -13  -2  160.06    3.21
   2  13  -2  155.03    3.23
  -2 -13  -2  155.89    3.27
  -2  13   2  158.27    2.82
  -2  13  -2  153.76    4.61
   2  13   2  161.87    4.05
   2 -13  -2  161.87    3.66
  -2  13  -2  163.60    3.75
  -2 -13   2  162.47    2.86
   2 -13  -2  165.50    3.12
  -2 -13   2  156.23    2.68
   2  13   2  160.28    3.42
   2  14  -2    2.24    2.14
  -2  14   2    3.39    1.67
   2  14  -2    1.91    1.32
  -2 -14  -2   -0.14    1.28
  -2 -14  -2    1.42    1.32
  -2  14   2    1.11    0.98
  -2  14  -2    1.11    2.44
   2  14   2    0.52    2.01
  -2  14  -2    1.02    2.72
   2 -14  -2    2.97    1.65
  -2 -14   2    1.55    0.99
   2 -14  -2    1.01    0.98
  -2 -14   2    0.94    0.90
   2  14   2    0.56    0.95
   2  15  -2    4.85    2.23
  -2  15   2    3.35    1.72
   2  15  -2    5.13    1.39
  -2 -15  -2    5.52    2.17
  -2 -15  -2    6.36    1.33
  -2  15   2    3.73    1.01
  -2  15  -2    8.05    2.55
   2  15   2    5.41    2.15
  -2  15  -2    5.61    2.82
   2 -15  -2    4.85    1.65
  -2 -15   2    4.53    1.01
   2 -15  -2    5.21    0.99
  -2 -15   2    4.50    0.90
   2  15   2    4.69    1.52
   2  16  -2   11.29    2.46
  -2  16   2   11.93    3.03
   2  16  -2   12.35    1.57
  -2 -16  -2   12.16    2.37
  -2 -16  -2   14.08    1.44
  -2  16   2   12.89    1.09
  -2  16  -2   12.71    2.82
   2  16   2   12.03    1.48
  -2  16  -2   13.62    1.92
   2 -16  -2   11.50    1.86
  -2 -16   2   12.27    1.10
   2 -16  -2   11.67    1.08
  -2 -16   2   13.44    0.94
   2  16   2   12.88    1.61
   2  17  -2   15.44    2.63
  -2  17   2   18.12    3.26
   2  17  -2   16.87    1.70
  -2 -17  -2   15.87    1.63
  -2 -17  -2   19.06    1.58
  -2  17   2   15.76    1.11
  -2  17  -2   16.19    1.91
   2  17   2   14.77    1.61
  -2  17  -2   20.43    3.28
   2 -17  -2   12.56    3.17
  -2 -17   2   15.26    1.10
   2 -17  -2   16.07    1.20
  -2 -17   2   14.37    0.99
   2  17   2   16.08    1.67
   2  18  -2   55.13    3.41
  -2  18   2   57.05    4.12
   2  18  -2   59.21    3.49
  -2 -18  -2   55.35    2.29
  -2 -18  -2   54.82    1.95
  -2  18   2   58.40    1.59
  -2  18  -2   56.03    2.54
   2  18   2   57.30    2.21
  -2  18  -2   58.57    4.25
   2 -18  -2   55.09    3.97
  -2 -18   2   56.48    1.56
   2 -18  -2   57.69    1.55
  -2 -18   2   54.44    1.37
   2  18   2   58.77    2.18
   2  19  -2  180.91    5.69
  -2  19   2  194.67    6.62
   2  19  -2  196.00    5.93
  -2 -19  -2  191.02    5.66
  -2 -19  -2  194.38    3.93
  -2  19   2  200.76    3.49
  -2  19  -2  183.30    6.15
   2  19   2  195.03    5.62
  -2  19  -2  192.47    5.04
   2 -19  -2  183.62    4.74
  -2 -19   2  186.56    3.64
   2 -19  -2  196.62    3.82
  -2 -19   2  189.18    3.10
   2  19   2  188.14    4.07
   2  20  -2   23.29    2.10
  -2  20   2   21.88    2.57
   2  20  -2   22.62    2.05
  -2 -20  -2   21.88    2.04
  -2 -20  -2   20.13    1.62
  -2  20   2   21.54    1.29
  -2  20  -2   22.79    3.69
   2  20   2   22.38    3.16
  -2  20  -2   19.32    3.96
   2 -20  -2   21.78    3.83
  -2 -20   2   22.26    1.20
   2 -20  -2   21.88    1.23
  -2 -20   2   21.45    1.07
   2  20   2   22.79    1.84
   2  21  -2    5.32    1.94
  -2  21   2    6.98    2.36
   2  21  -2    3.14    1.93
  -2 -21  -2    3.82    1.92
  -2 -21  -2    9.80    1.74
  -2  21   2    5.67    1.09
  -2  21  -2    6.94    2.26
   2  21   2    7.41    1.83
  -2  21  -2    4.74    2.39
   2 -21  -2    5.07    3.69
  -2 -21   2    5.19    1.01
   2 -21  -2    2.33    1.19
  -2 -21   2    4.40    1.10
   2  21   2    4.30    1.66
   2  22  -2    5.03    2.02
  -2  22   2    7.94    3.99
   2  22  -2    4.53    3.18
  -2 -22  -2    3.91    1.55
  -2  22   2    6.82    1.15
  -2  22  -2    6.88    3.73
   2  22   2    1.91    1.96
  -2  22  -2    9.11    4.01
   2 -22  -2   -0.70    2.39
  -2 -22   2    5.51    1.00
   2 -22  -2    4.57    1.06
  -2 -22   2    3.83    0.95
   2  23  -2   46.10    4.07
  -2  23   2   48.36    4.71
   2  23  -2   48.47    4.09
  -2 -23  -2   49.52    2.25
  -2 -23  -2   47.67    2.15
  -2  23   2   50.73    1.62
   2  23   2   46.52    2.57
  -2  23  -2   49.44    4.71
   2  23   2   49.10    3.88
  -2  23  -2   47.22    3.17
   2 -23  -2   48.36    4.67
  -2 -23   2   49.30    1.49
   2 -23  -2   45.88    1.45
  -2 -23   2   48.31    1.69
   2  24  -2   63.57    4.45
  -2  24   2   69.00    3.54
   2  24  -2   65.80    2.96
  -2 -24  -2   66.46    2.48
  -2 -24  -2   69.28    1.83
  -2  24   2   68.01    1.87
   2  24   2   66.53    4.24
  -2  24  -2   69.96    3.42
   2  24   2   67.04    4.18
  -2  24  -2   69.65    3.51
   2 -24  -2   67.99    5.16
  -2 -24   2   65.48    1.96
   2 -24  -2   68.23    1.70
  -2 -24   2   66.90    1.61
   2  25  -2    2.17    2.14
  -2  25   2    0.06    2.64
   2  25  -2    3.15    3.40
  -2 -25  -2    0.27    1.60
  -2 -25  -2    0.10    1.53
  -2  25   2    1.14    1.01
   2  25   2    2.29    2.04
  -2  25  -2    2.12    4.12
   2  25   2   -1.04    2.02
  -2  25  -2    0.95    4.26
   2 -25  -2    6.31    2.51
  -2 -25   2    0.76    0.86
   2 -25  -2    0.70    0.95
  -2 -25   2    0.18    0.83
   2  26  -2    1.98    3.63
  -2  26   2    2.82    4.13
   2  26  -2    2.87    2.20
  -2 -26  -2   -0.18    1.59
  -2 -26  -2   -0.47    1.57
   2  26   2    1.78    3.45
  -2  26  -2    2.84    4.32
   2  26   2   -1.72    3.39
  -2  26  -2   -0.77    2.68
  -2 -26   2   -0.17    1.06
   2 -26  -2    0.16    0.86
  -2 -26   2    0.67    1.08
  -2  27   2    6.26    2.81
   2  27  -2    5.96    3.90
  -2  27   2    4.71    2.83
   2  27  -2    8.97    2.39
  -2 -27  -2    6.28    1.75
  -2 -27  -2    8.15    1.87
   2  27   2    6.66    2.32
  -2  27  -2    4.66    2.79
   2  27   2    4.44    2.31
  -2  27  -2    6.11    4.50
   2 -27  -2    4.77    0.99
  -2 -27   2    4.38    1.02
   2 -27  -2    5.71    1.24
  -2 -27   2    6.06    0.89
   2  28  -2    6.01    2.51
  -2  28   2    4.10    2.82
   2  28  -2    3.39    3.87
  -2 -28  -2    2.76    1.73
  -2 -28  -2    2.96    1.79
   2  28   2    1.27    3.82
  -2  28  -2    7.14    4.67
   2  28   2    6.42    2.30
  -2  28  -2    2.02    2.91
  -2  29   2   51.45    3.71
   2  29  -2   51.17    5.07
  -2  29   2   55.20    5.76
   2  29  -2   50.83    3.27
  -2 -29  -2   50.62    2.44
  -2 -29  -2   57.99    2.40
   2  29   2   50.14    4.92
  -2  29  -2   55.80    3.77
   2  29   2   59.85    4.71
  -2  29  -2   53.18    5.78
  -2  30   2   24.52    3.41
   2  30  -2   23.95    4.73
  -2  30   2   23.74    3.40
   2  30  -2   29.11    4.46
   2  30   2   22.07    2.93
  -2  30  -2   21.86    5.29
   2  30   2   23.65    2.82
  -2  30  -2   20.26    3.40
  -2  31   2   -1.39    5.14
   2  31  -2   -2.91    2.81
  -2  31   2    2.71    5.22
   2  31  -2    7.69    4.21
   2  31   2    2.26    4.30
  -2  31  -2    4.52    5.16
   2  31   2   -1.94    4.13
  -2  31  -2    6.05    4.98
   2   0   3    3.88    1.66
  -2   0  -3    2.19    1.64
  -2   0   3    2.41    2.17
   2   0  -3    1.00    2.28
   2   0  -3    1.11    1.26
  -2   0   3    3.95    2.17
  -2   0  -3    1.07    1.86
   2   0   3    0.78    1.19
   2  -1   3 2016.85   58.37
   2   1  -3 2081.89   58.99
  -2  -1  -3 2021.55   57.50
  -2   1   3 2138.35   60.83
   2   1  -3 2104.19   61.79
  -2   1   3 2070.99   60.76
  -2  -1  -3 2086.53   60.64
   2  -1   3 2162.45   61.88
  -2   1  -3 2077.87   57.78
   2   1   3 2118.81   58.14
  -2  -1   3 2093.83   58.92
   2  -1  -3 2079.84   62.51
   2  -1  -3 2089.22   58.85
  -2  -1   3 2126.35   62.09
  -2   1  -3 2118.44   58.11
   2   1   3 2112.68   59.49
   2  -2   3 1006.27   20.17
   2   2  -3  991.12   20.20
  -2  -2  -3 1021.23   19.83
  -2   2   3  992.75   22.85
   2   2  -3 1017.83   20.52
  -2   2   3 1043.89   22.64
  -2  -2  -3  994.22   20.14
   2  -2   3 1020.71   20.92
  -2   2  -3 1030.06   22.06
  -2  -2   3  973.64   21.42
   2   2   3 1035.73   19.99
   2  -2  -3  997.70   23.05
  -2  -2   3 1031.67   22.30
   2  -2  -3 1021.92   20.75
  -2   2  -3 1037.64   19.69
   2   2   3  989.79   22.22
   2  -3   3   -1.01    1.20
   2   3  -3    0.68    1.15
  -2  -3  -3    0.14    0.90
   2   3  -3    0.18    1.87
  -2   3   3    1.29    1.17
  -2  -3  -3   -1.99    2.15
   2  -3   3   -0.59    1.26
  -2   3  -3    0.18    1.94
  -2  -3   3   -1.42    1.94
   2   3   3    0.66    1.55
   2  -3  -3   -1.09    2.42
  -2  -3   3    0.17    1.89
   2  -3  -3   -0.43    2.03
  -2   3  -3   -1.32    0.95
   2   3   3   -1.43    1.29
   2  -4   3 1882.99   50.76
   2   4  -3 1859.85   50.11
  -2   4   3 1871.62   54.19
  -2  -4  -3 1916.93   51.06
   2   4  -3 1865.95   51.11
  -2   4   3 1909.30   50.81
  -2  -4  -3 1763.32   49.85
   2  -4   3 1926.61   49.64
  -2   4  -3 1864.99   50.53
  -2  -4   3 1890.61   52.22
   2   4   3 1898.33   51.73
   2  -4  -3 1857.82   51.83
  -2  -4   3 1962.31   53.56
   2  -4  -3 1906.49   50.51
  -2   4  -3 1893.83   48.11
   2   4   3 1902.67   51.38
   2  -5   3 1256.33   31.11
   2   5  -3 1290.26   31.26
  -2   5   3 1285.91   30.49
  -2  -5  -3 1358.66   31.94
   2   5  -3 1340.63   31.13
  -2   5   3 1362.72   30.61
  -2  -5  -3 1329.52   31.94
   2  -5   3 1402.03   30.16
  -2   5  -3 1323.12   30.74
  -2  -5   3 1309.73   31.30
   2   5   3 1329.78   29.91
   2  -5  -3 1297.12   30.93
  -2  -5   3 1373.87   30.50
   2  -5  -3 1350.10   30.17
  -2   5  -3 1386.23   28.77
   2   5   3 1328.48   32.19
   2  -6   3  211.96    4.82
   2   6  -3  201.97    3.47
  -2   6   3  205.59    5.22
  -2  -6  -3  204.86    4.08
   2   6  -3  199.84    3.76
  -2   6   3  200.46    3.94
  -2  -6  -3  202.14    3.46
   2  -6   3  208.91    2.67
  -2   6  -3  210.16    4.76
  -2  -6   3  197.29    4.25
   2   6   3  204.00    3.34
   2  -6  -3  207.34    5.13
  -2  -6   3  207.30    3.83
   2  -6  -3  200.78    3.21
  -2   6  -3  198.49    2.49
   2   6   3  201.90    3.49
   2  -7   3    5.97    2.16
   2   7  -3    5.76    1.16
  -2   7   3    5.95    2.47
  -2  -7  -3    5.83    1.73
   2   7  -3    6.64    1.37
  -2   7   3    6.42    1.56
  -2  -7  -3    7.20    1.87
   2  -7   3    6.44    0.56
  -2  -7   3    6.71    1.84
  -2   7  -3    7.17    1.36
   2  -7  -3    6.58    2.51
  -2  -7   3    6.46    1.35
   2  -7  -3    5.81    1.56
  -2   7  -3    6.27    0.43
   2   7   3    7.42    1.16
   2   8  -3   96.25    2.15
  -2   8   3  101.40    3.78
  -2  -8  -3   95.13    2.05
   2   8  -3  102.91    2.33
  -2   8   3   95.13    2.40
  -2  -8  -3   94.01    2.02
  -2  -8   3   99.05    2.13
  -2   8  -3  100.19    2.42
   2   8   3  101.87    2.95
   2  -8  -3  100.60    3.64
  -2  -8   3   97.14    2.21
   2  -8  -3   96.16    2.47
   2   8   3   94.63    2.92
   2   9  -3   18.41    1.33
  -2   9   3   25.01    2.85
  -2  -9  -3   18.60    1.23
   2   9  -3   18.04    1.34
  -2   9   3   18.56    1.53
  -2  -9  -3   18.93    1.87
  -2  -9   3   17.61    1.32
  -2   9  -3   17.81    2.53
   2   9   3   19.05    2.06
   2  -9  -3   17.29    1.73
  -2   9  -3   18.62    1.64
  -2  -9   3   19.90    1.31
   2  -9  -3   22.36    1.57
   2   9   3   19.79    1.27
   2  10  -3  202.70    3.75
  -2  10   3  206.73    4.13
  -2 -10  -3  211.38    4.75
   2  10  -3  202.20    3.52
  -2  10   3  199.08    3.71
  -2 -10  -3  204.22    3.46
  -2 -10   3  206.73    3.70
  -2  10  -3  204.92    4.06
   2  10   3  213.34    4.70
   2 -10  -3  203.62    4.16
  -2  10  -3  204.79    4.12
  -2 -10   3  208.52    3.48
   2 -10  -3  195.94    3.22
   2  10   3  212.40    3.64
   2  11  -3   93.27    2.27
  -2  11   3   94.10    2.67
  -2 -11  -3   95.94    2.29
  -2  11  -3   92.39    3.70
   2  11   3   96.01    3.16
   2 -11  -3   97.43    2.69
  -2  11  -3   97.93    3.78
  -2 -11   3   94.13    2.02
   2 -11  -3  104.22    3.43
   2  11   3   94.50    2.88
   2  12  -3    9.75    2.15
  -2  12   3   10.13    2.69
  -2 -12  -3    6.35    2.07
   2  12  -3   11.37    2.20
  -2  12   3    6.02    1.36
  -2 -12  -3    6.82    1.68
  -2  12  -3    9.64    2.58
   2  12   3    8.59    1.30
   2 -12  -3    8.70    2.70
  -2  12  -3    7.88    2.61
  -2 -12   3    8.20    1.06
   2 -12  -3    5.25    1.41
   2  12   3    7.51    1.74
  -2 -12   3    8.69    1.04
   2  13  -3   10.81    1.38
  -2  13   3    7.72    2.76
  -2 -13  -3    8.02    2.15
   2  13  -3    9.76    1.41
  -2  13   3   10.24    0.90
  -2 -13  -3   11.12    1.05
  -2  13  -3    9.71    2.61
   2  13   3    9.38    2.07
   2 -13  -3    6.90    2.83
  -2  13  -3    9.75    2.68
  -2 -13   3   10.84    1.02
   2 -13  -3    6.71    1.49
   2  13   3    9.51    1.08
  -2 -13   3   10.54    0.98
   2  14  -3   15.64    2.37
  -2  14   3   15.01    1.83
  -2 -14  -3   15.67    1.48
   2  14  -3   18.64    2.35
  -2 -14  -3   15.27    1.62
  -2  14   3   16.32    1.38
  -2  14  -3   14.75    1.75
   2  14   3   15.78    2.19
   2 -14  -3   17.23    2.95
  -2  14  -3   17.16    1.75
  -2 -14   3   15.09    1.06
   2 -14  -3   16.71    1.35
   2  14   3   17.00    1.14
  -2 -14   3   15.58    1.01
   2  15  -3   25.29    1.68
  -2  15   3   25.98    2.05
  -2 -15  -3   26.41    1.59
   2  15  -3   27.01    2.59
  -2 -15  -3   24.18    1.69
  -2  15   3   26.13    1.46
  -2  15  -3   27.51    1.94
   2  15   3   24.78    1.57
   2 -15  -3   20.48    3.10
  -2  15  -3   27.36    2.00
  -2 -15   3   25.35    1.12
   2 -15  -3   26.34    1.41
  -2 -15   3   26.71    1.07
   2  15   3   25.16    1.91
   2  16  -3    5.85    1.47
  -2  16   3    0.37    1.92
  -2 -16  -3    3.21    2.27
   2  16  -3    2.49    2.37
  -2 -16  -3    1.68    1.54
  -2  16   3    4.71    1.26
  -2  16  -3    5.53    1.74
   2  16   3    4.49    1.43
   2 -16  -3    2.24    3.01
  -2  16  -3    3.62    1.85
  -2 -16   3    4.81    0.91
   2 -16  -3    1.85    1.27
  -2 -16   3    3.27    0.86
   2  16   3    3.11    1.64
   2  17  -3   21.70    1.80
  -2  17   3   23.49    2.21
   2  17  -3   24.62    2.75
  -2 -17  -3   21.46    2.66
  -2 -17  -3   19.71    1.72
  -2  17   3   21.75    1.43
  -2  17  -3   20.88    3.20
   2  17   3   24.40    1.69
  -2  17  -3   21.33    3.48
   2 -17  -3   23.82    3.39
  -2 -17   3   22.27    1.08
   2 -17  -3   21.68    1.42
  -2 -17   3   22.14    0.99
   2  17   3   20.81    1.91
   2  18  -3   -0.80    1.62
  -2  18   3   -0.74    1.96
   2  18  -3    0.70    2.66
  -2 -18  -3   -1.34    2.55
  -2 -18  -3   -1.01    0.93
  -2  18   3   -0.46    1.23
  -2  18  -3    0.26    3.05
   2  18   3    0.58    1.53
  -2  18  -3    0.49    2.01
   2 -18  -3    2.01    1.90
  -2 -18   3    1.45    0.89
   2 -18  -3    0.15    1.20
  -2 -18   3    0.32    0.77
   2  18   3    0.06    1.76
   2  19  -3   80.78    2.89
  -2  19   3   86.95    3.31
   2  19  -3   88.28    4.14
  -2 -19  -3   80.66    4.03
  -2 -19  -3   83.11    1.95
  -2  19   3   87.94    2.23
  -2  19  -3   76.22    4.56
   2  19   3   85.54    2.77
  -2  19  -3   81.50    3.32
   2 -19  -3   84.10    3.21
  -2 -19   3   83.50    1.78
   2 -19  -3   83.16    2.27
  -2 -19   3   81.99    1.62
   2  19   3   80.94    2.85
   2  20  -3  381.56    8.22
  -2  20   3  381.74    8.57
   2  20  -3  383.05    8.26
  -2 -20  -3  382.28    8.18
  -2 -20  -3  384.05    7.54
  -2  20   3  386.72    7.00
  -2  20  -3  366.67    8.40
   2  20   3  391.43    8.14
  -2  20  -3  393.84   11.02
   2 -20  -3  374.28    8.63
  -2 -20   3  388.94    6.76
   2 -20  -3  394.82    7.10
  -2 -20   3  378.94    6.02
   2  20   3  385.65    7.99
   2  21  -3   48.62    2.61
  -2  21   3   54.29    2.92
   2  21  -3   52.67    2.62
  -2 -21  -3   49.96    3.80
  -2 -21  -3   44.08    2.38
  -2  21   3   53.75    1.87
  -2  21  -3   48.16    2.94
   2  21   3   51.71    3.65
  -2  21  -3   53.58    4.66
   2 -21  -3   51.24    4.55
  -2 -21   3   51.57    1.41
   2 -21  -3   47.98    1.82
  -2 -21   3   49.50    1.34
   2  21   3   51.00    2.44
   2  22  -3   -0.91    2.01
  -2  22   3    1.88    3.74
   2  22  -3    2.22    3.16
  -2 -22  -3    2.13    3.09
  -2 -22  -3   -2.86    1.79
  -2  22   3    0.38    1.31
  -2  22  -3    1.54    2.32
   2  22   3    1.20    2.95
  -2  22  -3    1.30    2.38
   2 -22  -3    1.51    3.74
  -2 -22   3    0.85    0.85
   2 -22  -3    0.70    1.41
  -2 -22   3    1.19    1.09
   2  22   3    0.35    1.74
   2  23  -3   17.29    3.58
  -2  23   3   21.25    4.12
   2  23  -3   14.54    3.65
  -2 -23  -3   19.00    2.23
  -2 -23  -3   14.97    1.99
  -2  23   3   18.06    1.48
  -2  23  -3   23.52    4.11
   2  23   3   21.28    3.31
  -2  23  -3   20.44    4.32
   2 -23  -3   14.07    2.66
  -2 -23   3   16.16    1.24
   2 -23  -3   17.42    1.43
   2  23   3   18.07    1.96
   2  24  -3   -2.04    3.51
  -2  24   3    2.55    4.11
   2  24  -3   -0.04    2.05
  -2 -24  -3    2.08    2.08
  -2 -24  -3    0.44    1.87
  -2  24   3    1.92    1.32
  -2  24  -3   -1.93    3.96
   2  24   3    2.29    1.93
  -2  24  -3    0.73    2.63
[truncated: 2,720,753 more chars]
