# Supplementary material
Source: MDPI journal article supplement (https://www.mdpi.com/2304-6740/7/8/100)
Supplement: s1 [file s1 › Supplementary.pdf]

# Supplementary Materials: Characterization and Photophysical Properties of a Luminescent Aluminum Hydride Complex Supported by a $\beta$ -Diketiminato Ligand

Shunichiro Ito, Kazuo Tanaka and Yoshiki Chujo

## NMR Spectra

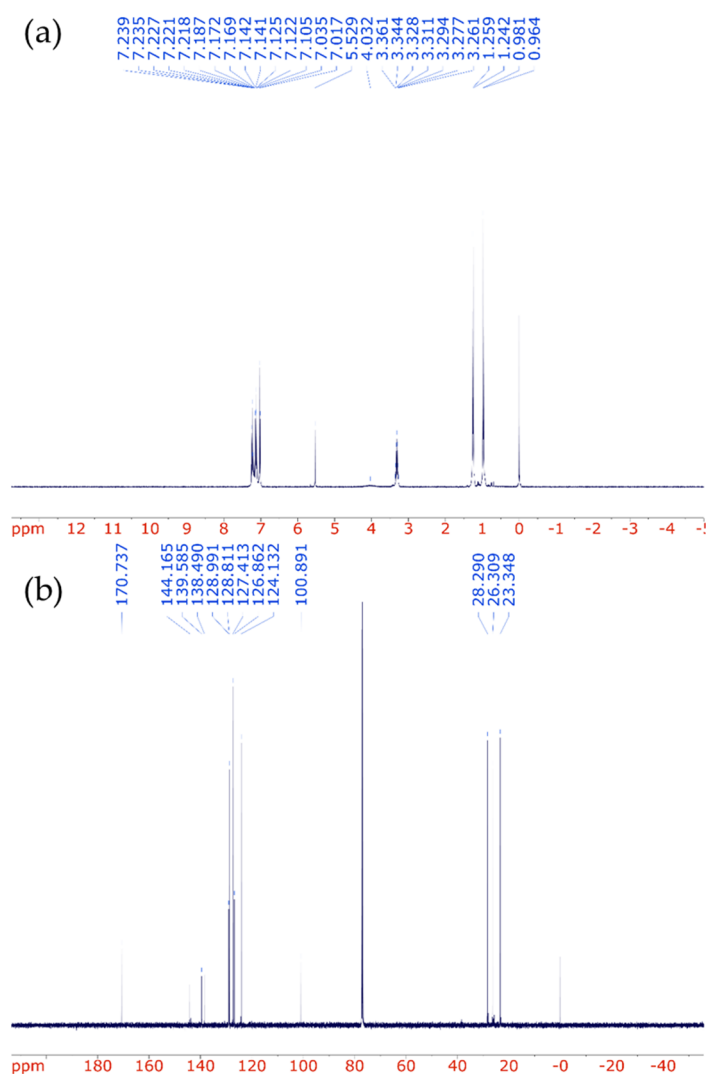

Figure S1. (a)  $^1\text{H}$  and (b)  $^{13}\text{C}\{^1\text{H}\}$  NMR spectra of LAIH in  $\text{CDCl}_3$ .

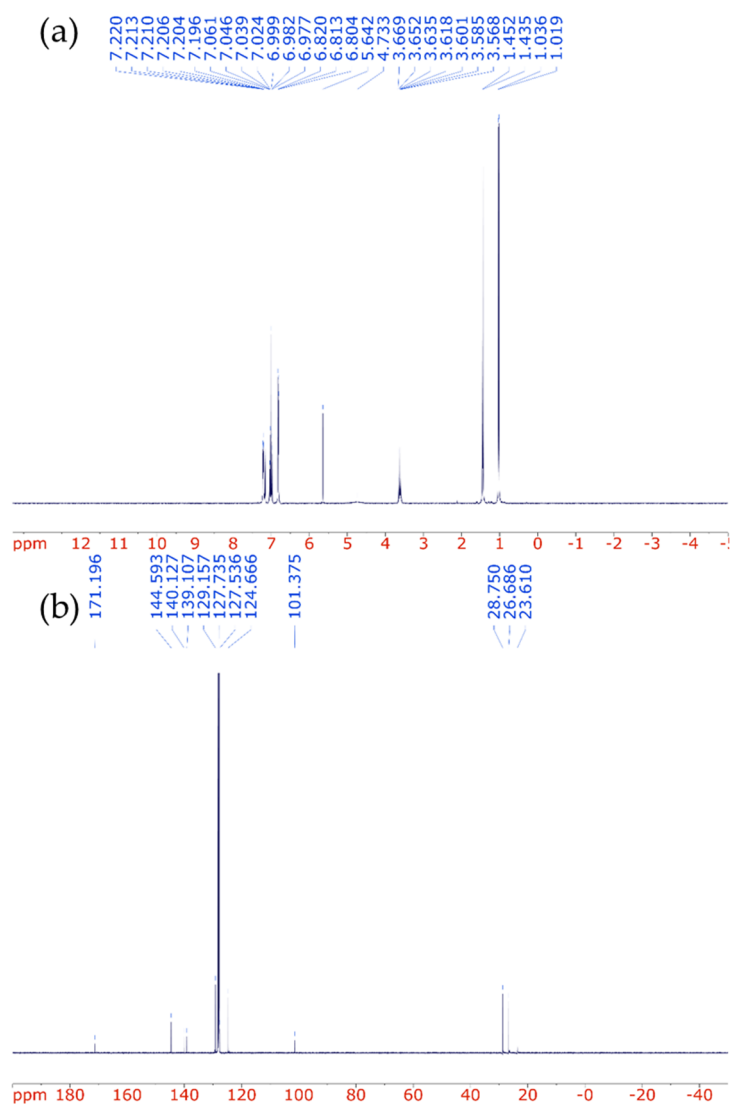

**Figure S2.** (a)  $^1H$  and (b)  $^{13}C\{^1H\}$  NMR spectra of LAIH in  $C_6D_6$ .

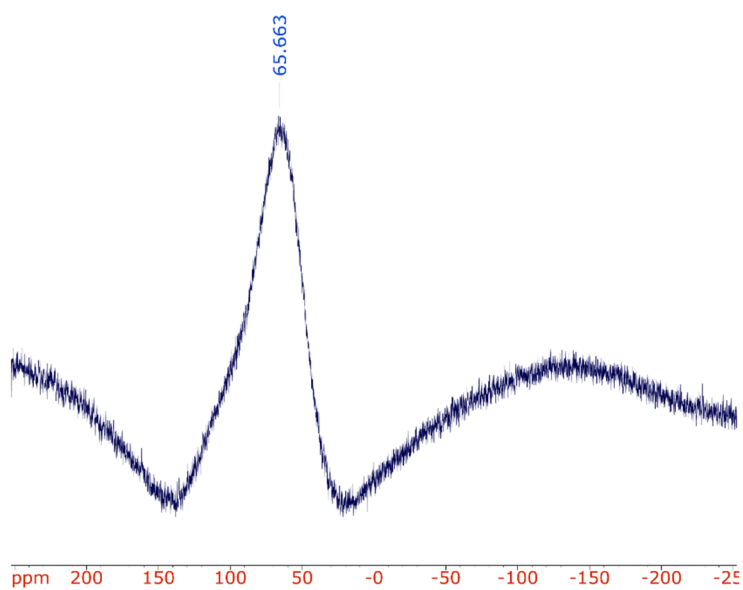

**Figure S3.**  $^{27}Al\{^1H\}$  NMR spectrum of LAIH in  $C_6D_6$ .  $Al(NO_3)_3 \cdot 9H_2O$  in  $D_2O$  was used as an external standard (0 ppm).

## Single Crystal X-ray Analysis

**Table S1.** Selected X-ray data, collection and refinement parameters for **LAIH**.

| <i>Crystal data</i>                                                           |                                                                            |
|-------------------------------------------------------------------------------|----------------------------------------------------------------------------|
| Chemical formula                                                              | $C_{39}H_{47}AlN_2$                                                        |
| $M_r$                                                                         | 570.76                                                                     |
| Crystal system, Space group                                                   | Orthorhombic, $Pbca$                                                       |
| Temperature (K)                                                               | 88                                                                         |
| $a, b, c$ (Å)                                                                 | 16.0206 (3), 24.7785 (5), 16.9022 (4)                                      |
| $V$ (Å <sup>3</sup> )                                                         | 6709.6 (2)                                                                 |
| $Z$                                                                           | 8                                                                          |
| Radiation type                                                                | Mo $K\alpha$                                                               |
| $\mu$ (mm <sup>-1</sup> )                                                     | 0.09                                                                       |
| Crystal size (mm)                                                             | 0.70 × 0.30 × 0.25                                                         |
| <i>Data collection</i>                                                        |                                                                            |
| Diffractometer                                                                | Rigaku Raxis Rapid                                                         |
| Absorption correction                                                         | Empirical (using intensity measurements)<br><i>ABSCOR</i> , (Rigaku, 1995) |
| $T_{min}, T_{max}$                                                            | 0.861, 1.000                                                               |
| No. of measured, independent and<br>observed [ $I > 2\sigma(I)$ ] reflections | 101680, 7680, 6542                                                         |
| $R_{int}$                                                                     | 0.044                                                                      |
| $(\sin \theta/\lambda)_{max}$ (Å <sup>-1</sup> )                              | 0.649                                                                      |
| <i>Refinement</i>                                                             |                                                                            |
| $R[F^2 > 2\sigma(F^2)], wR(F^2), S$                                           | 0.043, 0.106, 1.05                                                         |
| No. of reflections                                                            | 7680                                                                       |
| No. of parameters                                                             | 393                                                                        |
| H-atom treatment                                                              | H atoms treated by a mixture of independent and constrained refinement     |
| $\Delta\rho_{max}, \Delta\rho_{min}$ (e Å <sup>-3</sup> )                     | 0.36, -0.21                                                                |

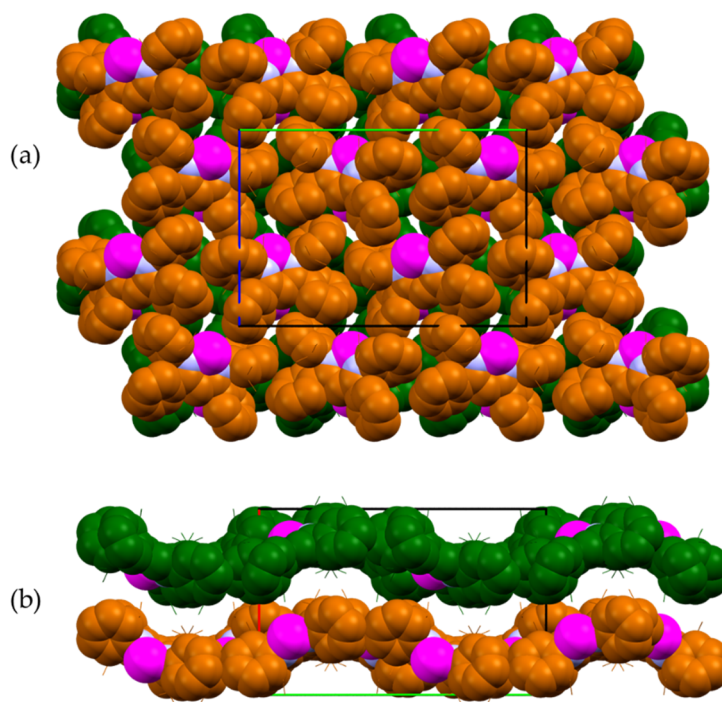

**Figure S4.** Packing diagram of **LAIH** viewed along with (a)  $a$  and (b)  $b$  axes. All hydrogen atoms were omitted for clarity. Isopropyl groups were shown in wireframe. Legends: red bar,  $a$  axis; green bar,  $b$  axis; and blue bar,  $c$  axis. Key to atom color: carbon, copper and green; aluminum, magenta; and nitrogen, blue.

## Photophysical Measurements

### Estimation of $k_{\text{FL}}^0$

First, the absorption band  $\epsilon(\lambda)$  in the longest wavelength region (361.5–543.5 nm) was fitted with a single-component Gaussian function as a function of wavelength:

$$\epsilon(\lambda) = \epsilon_0 + \frac{A}{w\sqrt{\pi/2}} \exp \left[ -2 \left( \frac{\lambda - \lambda_0}{w} \right)^2 \right] \quad (\text{S1})$$

where  $\epsilon_0$ ,  $\lambda_0$ ,  $A$  and  $w$  were fitting parameters corresponding to a baseline, a central wavelength, an area, and a full width at half maximum, respectively. We converted the fitted curve in the wavelength scale to the one in the wavenumber scale by simply taking a reciprocal (Figure S5). The integration of the fitted curve was carried out, then the  $k_{\text{FL}}^0$  value was estimated according to the Strickler–Berg equation:

$$k_{\text{FL}}^0 = 2.880 \times 10^{-9} n^2 \tilde{\nu}_0^2 \frac{g_l}{g_u} \int \epsilon(\tilde{\nu}) d\tilde{\nu}, \quad (\text{S2})$$

where  $n$  means a refractive index of solvent,  $\tilde{\nu}_0$  denotes photon energy in wavenumber at an absorption maximum,  $g_l$  and  $g_u$  are degeneracies of lower and upper states of interest, and  $\epsilon(\tilde{\nu})$  is molar absorption coefficient as a function of wavenumber, respectively. The fitted parameters and the used values for the calculation were listed in Tables S2 and S3.

**Table S2.** Fitted parameters for the UV–vis spectrum.

| Parameter    | Fitted Value | Standard Error |
|--------------|--------------|----------------|
| $\epsilon_0$ | 0.01254      | 0.00149        |
| $\lambda_0$  | 394.21554    | 0.05969        |
| $w$          | 49.27002     | 0.14788        |
| $A$          | 85.50728     | 0.26228        |

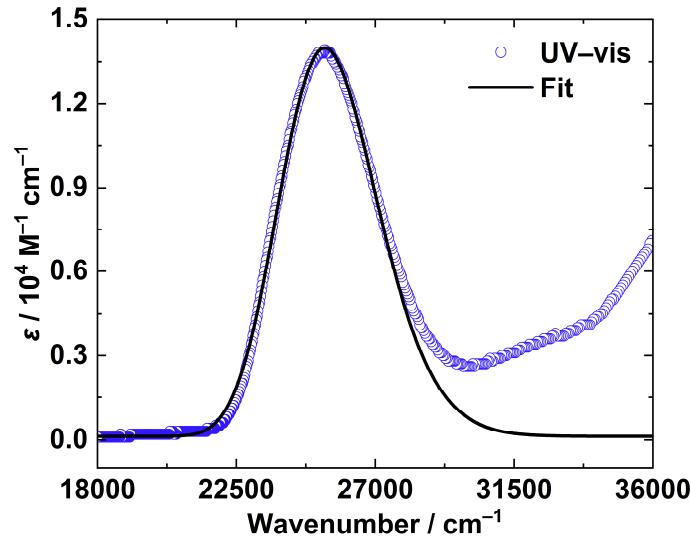

**Figure S5.** UV–vis absorption spectrum (blue circles) and the fitted curve (black line).

**Table S3.** Parameters for estimation of  $k_{\text{FL}}^0$ .

| $\int \epsilon(\tilde{\nu}) d\tilde{\nu} / \text{M}^{-1} \text{cm}^{-2}$ | $n$   | $\tilde{\nu}_0 / \text{cm}^{-1}$ |
|--------------------------------------------------------------------------|-------|----------------------------------|
| $5.57 \times 10^7$                                                       | 1.371 | $2.54 \times 10^4$               |

## Fluorescence Lifetime

Fluorescence decay curves were recorded by using time-correlated single-photon counting method. Photoexcitation was carried out at 375 nm and instrument response functions (IRFs) were detected at 375 nm with a neutral density filter.

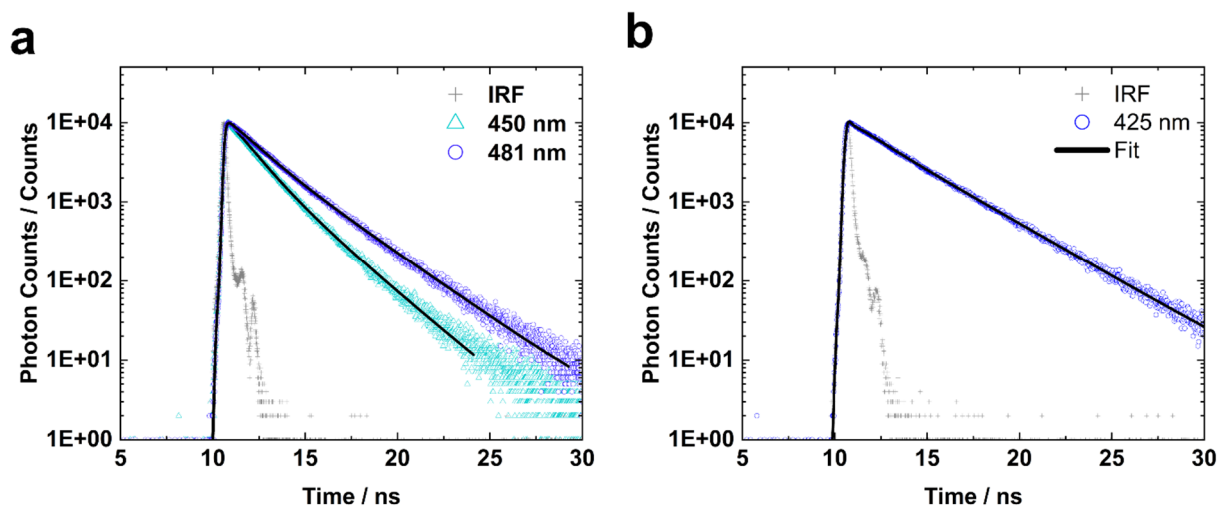

**Figure S6.** Fluorescence decay curves of LAIH (a) in the crystalline state at r.t. detected at 450 (cyan triangles) and 481 nm (blue circles) and (b) in the solution state at 80 K. Fitted curves were shown as solid lines.

**Table S4.** Fitted parameters for fluorescence lifetime measurements of the crystals at r.t.

| Detector Position |        | $\tau_1$ / ns<br>$f_1$ (%) <sup>a</sup> | $\tau_2$ / ns<br>$f_2$ (%) <sup>a</sup> | $\chi^2$ <sup>b</sup> | $\langle\tau\rangle$ / ns <sup>c</sup> |
|-------------------|--------|-----------------------------------------|-----------------------------------------|-----------------------|----------------------------------------|
| Solution          | 425 nm | 1.43 <sup>d</sup>                       | 3.27 <sup>d</sup>                       | 1.20                  | 3.0                                    |
|                   |        | 7.72 <sup>d</sup>                       | 87.32 <sup>d</sup>                      |                       |                                        |
| Crystal           | 450 nm | 1.16                                    | 2.25                                    | 0.98                  | 1.7                                    |
|                   |        | 48.15                                   | 51.85                                   |                       |                                        |
|                   | 481 nm | 1.39                                    | 2.75                                    | 1.01                  | 2.3                                    |
|                   |        | 31.07                                   | 68.93                                   |                       |                                        |

<sup>a</sup> Photoluminescence decay curve was fitted with two-exponential decay function:  $I(t) = I_0 \sum \alpha_i \exp(-t/\tau_i)$ .  $f_i$ 's are fractions of each component  $i$ , which can be written as follows:  $f_i = \alpha_i \tau_i / \sum \alpha_i \tau_i$ . <sup>b</sup> Goodness-of-fit. <sup>c</sup>  $\langle\tau\rangle = \sum \alpha_i \tau_i^2 / \sum \alpha_i \tau_i = \sum f_i \tau_i$ . <sup>d</sup> Fitted by three-components exponential decay with one fixed component as scattered light ( $\tau = 27.7$  ps,  $f = 4.96\%$ ).

## Kinetics of Photophysical Process

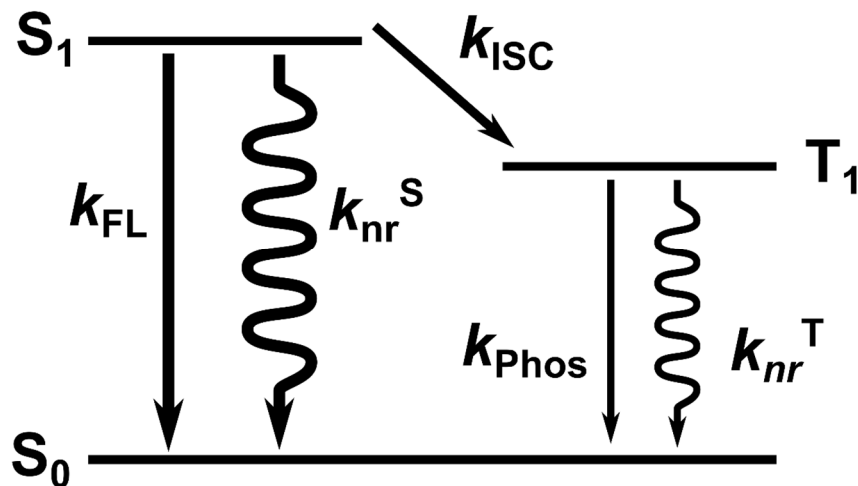

Figure S7. Simple Jablonski diagram for LAIH.

### Phosphorescence Property

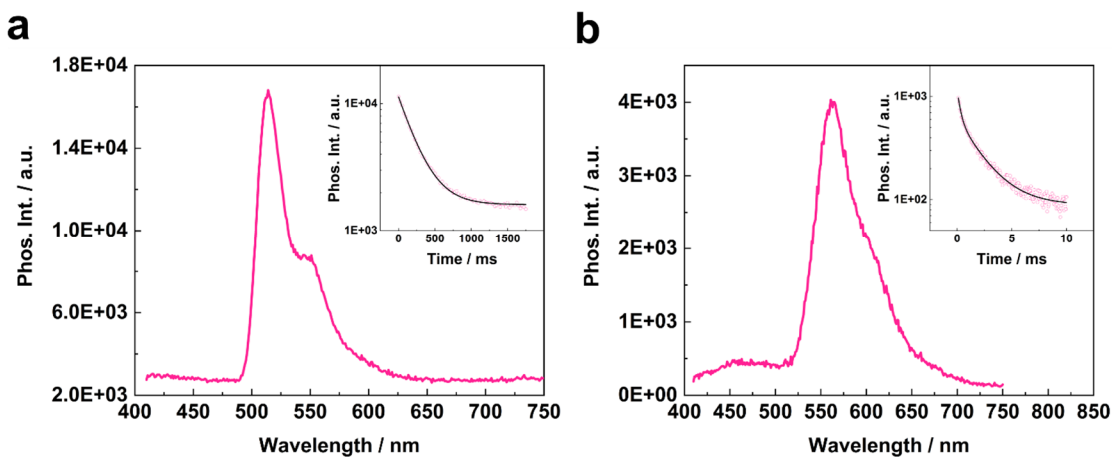

Figure S8. Phosphorescence spectra of LAIH at 80 K in (a) the solution and (b) crystalline states. The spectra were recorded after 1.0 ms from the excitation. Insets show the corresponding phosphorescence decay curves.

Table S5. Phosphorescence lifetimes of LAIH at 80 K.

| Condition | $\tau_1$ / ms<br>$A_1$ / a.u. | $\tau_2$ / ms<br>$A_2$ / a.u.    | $R^2$ | $\langle \tau \rangle$ / ms <sup>b</sup> |
|-----------|-------------------------------|----------------------------------|-------|------------------------------------------|
| Solution  | 231<br>9716                   | — <sup>c</sup><br>— <sup>c</sup> | 0.999 | 231                                      |
| Crystals  | 0.29<br>529                   | 2.15<br>526                      | 0.993 | 1.9                                      |

<sup>a</sup> Photoluminescence decay curve was fitted with exponential decay function:  $I(t) = I_0 \sum A_i \exp(-t/\tau_i)$ . <sup>b</sup>  $\langle \tau \rangle = \sum A_i \tau_i^2 / \sum A_i \tau_i$ . <sup>c</sup> Data were fitted with a single-component function.

### Estimation of Fluorescence and Phosphorescence Quantum Yields

The photoluminescence spectrum of LAIH in the solution state at 80 K was deconvoluted with 7 Gaussian functions in wavelength scale, then the integrated intensities were calculated for both the fluorescence and the phosphorescence parts (Figure S9).

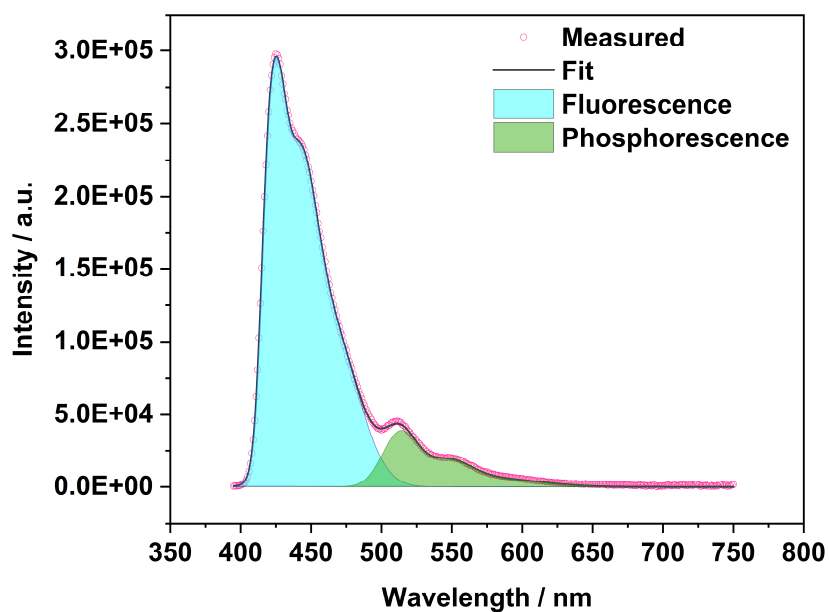

Figure S9. Deconvoluted photoluminescence spectrum of LAIH in the solution state at 80 K.

Table S6. Results of deconvolution of the photoluminescence spectrum.

| Component       | Integrated Intensity / a.u. | Intensity Ratio | $\Phi$ |
|-----------------|-----------------------------|-----------------|--------|
| Fluorescence    | $1.44 \times 10^7$          | 0.867           | 0.80   |
| Phosphorescence | $2.22 \times 10^6$          | 0.133           | 0.12   |

#### DFT Calculations

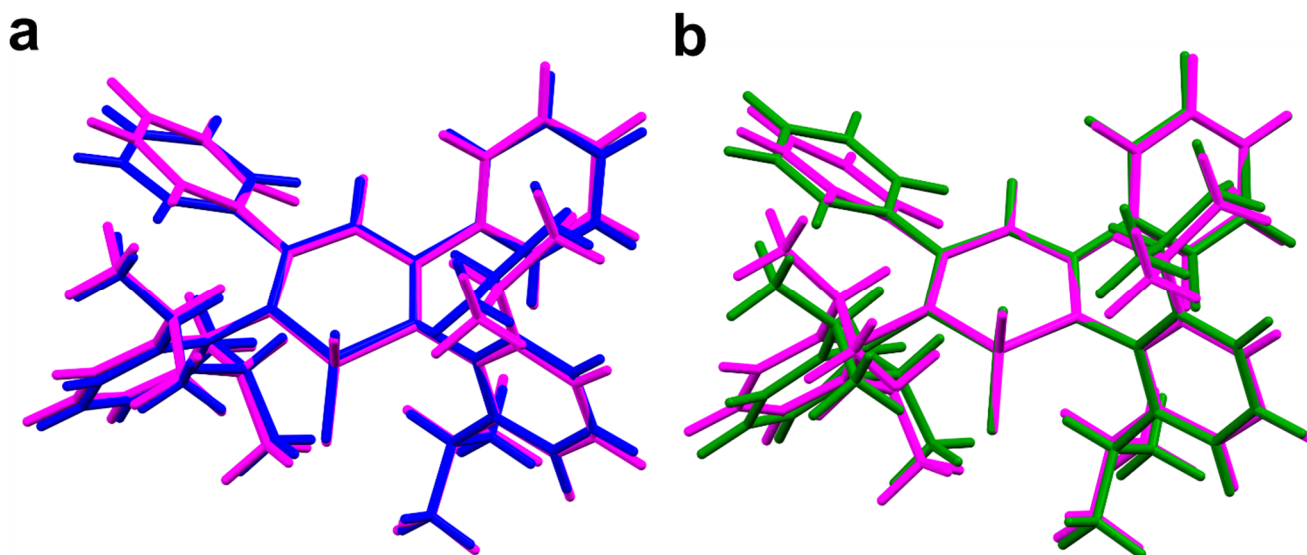

Figure S10. Superimposed structures of (a) the single-crystal (blue) and the  $S_0$  optimized (magenta) structures, and (b)  $S_0$  (magenta) and  $S_1$  (green) optimized structures.

We briefly overview the derivatization of internal conversion rate constant, according to the formalization by Lin [1]. When we regard a molecule without strong coupling with the neighboring molecules, *e.g.*, in a dilute solution, we can take the Hamiltonian for the system as follows;

$$\hat{H} = \hat{T} + \hat{h}_s + \sum_{\alpha} \hat{h}_{\alpha} + \sum_{\alpha > \beta} \hat{V}_{\alpha, \beta} + \sum_{\alpha} \hat{V}_{s, \alpha}, \quad (S3)$$

where  $\hat{T}$  is the kinetic-energy operator of all nuclear motion including both intra- and intermolecular vibration of the solute and solvent molecules,  $\hat{h}_s$  and  $\sum_{\alpha} \hat{h}_{\alpha}$  are the electronic-energy operators for the internal state of the solute and solvent molecules, respectively, and  $\sum_{\alpha > \beta} \hat{V}_{\alpha, \beta}$  and  $\sum_{\alpha} \hat{V}_{s, \alpha}$ , respectively, represent the potential energy of the solvent–solvent and the solute–solvent interactions. Using the adiabatic approximation, the state of the system,  $|\Psi_{av}\rangle$ , is described by the product of the wavefunctions for the electrons,  $|\Phi_a\rangle$ , and for the intra- and intermolecular vibrations,  $|\Theta_{av}\rangle$ :

$$|\Psi_{av}\rangle = |\Phi_a\rangle |\Theta_{av}\rangle. \quad (S4)$$

In this approximation, an electron does not make the transitions from one state to others. In other words,  $|\Phi_a\rangle$ , and  $|\Theta_{av}\rangle$  are the solutions of the following Schrödinger equations:

$$\left( \hat{h}_s + \hat{h}_s + \sum_{\alpha} \hat{h}_{\alpha} + \sum_{\alpha > \beta} \hat{V}_{\alpha, \beta} + \sum_{\alpha} \hat{V}_{s, \alpha} \right) |\Phi_a\rangle = \hat{U}_a(\mathbf{R}) |\Phi_a\rangle. \quad (S5)$$

and

$$[\hat{T} + \hat{U}_a(\mathbf{R})] |\Theta_{av}\rangle = E_{av} |\Theta_{av}\rangle, \quad (S6)$$

where  $\hat{U}_a(\mathbf{R})$  is the adiabatic potential of the  $a$ -th electronic state at the instantaneous positions  $\mathbf{R}$ , and  $v$  signifies the overall vibrational state of the nuclei.

In order to consider the radiationless transitions, we must look for the perturbation causing the transition between different electronic states in accordance with the approximate nature of the wavefunctions given by Eq. S4. As shown by Huang and Rhys, and Kubo independently [2,3], the perturbation of the system for a process such as nonradiative transitions determined from the approximate nature of the wavefunction is given by

$$\hat{H}' |\Psi_{av}\rangle = \hat{T} |\Phi_a\rangle |\Theta_{av}\rangle - |\Phi_a\rangle \hat{T} |\Theta_{av}\rangle. \quad (S7)$$

We take the kinetic-energy operator of nuclear motion  $\hat{T}$  in terms of normal coordinates  $Q_i$ 's including both intra- and intermolecular vibrations referring to the electronic state  $a$ :

$$\hat{T} = -\frac{1}{2} \hbar^2 \sum_i \frac{\partial^2}{\partial Q_i^2}, \quad (S8)$$

then the perturbation can be written as

$$\begin{aligned} \hat{H}' |\Psi_{av}\rangle &= -\frac{1}{2} \hbar^2 \sum_i \frac{\partial^2}{\partial Q_i^2} |\Phi_a\rangle |\Theta_{av}\rangle - |\Phi_a\rangle \left( -\frac{1}{2} \hbar^2 \sum_i \frac{\partial^2}{\partial Q_i^2} \right) |\Theta_{av}\rangle \\ &= -\hbar^2 \sum_i \left| \frac{\partial \Phi_a}{\partial Q_i} \right| \left| \frac{\partial \Theta_{av}}{\partial Q_i} \right\rangle - \frac{1}{2} \hbar^2 \sum_i \left| \frac{\partial^2 \Phi_a}{\partial Q_i^2} \right| |\Theta_{av}\rangle. \end{aligned} \quad (S9)$$

From time-dependent perturbation theory, the transition probability from the state  $(iv')$  to a final state  $(fv'')$  is

$$W(fv'' \rightarrow iv') = \frac{2\pi}{\hbar} \left| \langle \Psi_{fv''} | \hat{H}' | \Psi_{iv'} \rangle \right|^2 \delta(E_{fv''} - E_{iv'}), \quad (S10)$$

where the quantities  $E_{iv'}$  and  $E_{fv''}$  are the energies of the system in the initial and final states, respectively. Since we assume that the vibrational relaxation time is much shorter than the electronic relaxation time, a general result will require a Boltzmann average of the transition probability over all thermally available vibrational states of the solute and solvent molecules. Hence, the total

transition probability is given by summing Eq. S10 over all initial vibrational states  $v'$  weighted by their Boltzmann factors and then summing over all final vibrational states  $v''$  consistent with the energy conservation:

$$W(f \rightarrow i) = \frac{2\pi}{\hbar} \sum_{v', v''} P_{v'} \left| \langle \Psi_{fv''} | \hat{H}' | \Psi_{iv'} \rangle \right|^2 \delta(E_{fv''} - E_{iv'}), \quad (\text{S11})$$

where  $P_{v'}$  is the Boltzmann weighting factor and is given by

$$\begin{aligned} P_{v'} &= \left[ \sum_{v'} \exp\left(-\frac{E_{iv'}}{kT}\right) \right]^{-1} \exp\left(-\frac{E_{iv'}}{kT}\right) \\ &= \prod_k^N 2 \sinh\left(\frac{\hbar\omega'_k}{2kT}\right) \exp\left[-\left(v'_k + \frac{1}{2}\right) \frac{\hbar\omega'_k}{kT}\right], \end{aligned} \quad (\text{S12})$$

where  $N$  represents the total number of normal modes of vibrations including both intra- and intermolecular vibrations.

From Eq. S7 we have the matrix elements for the perturbation factor due to the  $i$ -th vibrational mode as

$$\begin{aligned} \langle \Psi_{fv''} | \hat{H}'_i | \Psi_{iv'} \rangle &= -\hbar^2 \left\langle \Phi_f \Theta_{fv''} \left| \frac{\partial \Phi_i}{\partial Q_i} \frac{\partial \Theta_{iv'}}{\partial Q_i} \right. \right\rangle \\ &\quad - \frac{\hbar^2}{2} \left\langle \Phi_f \Theta_{fv''} \left| \Theta_{iv'} \frac{\partial^2 \Phi_i}{\partial Q_i^2} \right. \right\rangle. \end{aligned} \quad (\text{S13})$$

When we apply the Condon approximation, Eq. S13 becomes

$$\langle \Psi_{fv''} | \hat{H}'_i | \Psi_{iv'} \rangle = R_i(fi) \left\langle \Theta_{fv''} \left| \frac{\partial}{\partial Q_i} \right| \Theta_{iv'} \right\rangle, \quad (\text{S14})$$

where

$$R_i(fi) = -\hbar^2 \left\langle \Phi_f \left| \frac{\partial}{\partial Q_i} \right| \Phi_i \right\rangle. \quad (\text{S15})$$

Thus, we find

$$W_{f \rightarrow i} = \frac{2\pi}{\hbar} \sum_l \sum_{v', v'' \neq l} P_{v'} |R_l(fi)|^2 \left| \left\langle \Theta_{fv''} \left| \frac{\partial}{\partial Q_l} \right| \Theta_{iv'} \right\rangle \right|^2 \delta(E_{fv''} - E_{iv'}). \quad (\text{S16})$$

Assuming only one promoting mode  $l$ , the rate constant of internal conversion becomes

$$W_{f \rightarrow i} = \frac{2\pi}{\hbar} |R_l(fi)|^2 \sum_{v', v'' \neq l} P_{v'} \left| \left\langle \Theta_{fv''} \left| \frac{\partial}{\partial Q_l} \right| \Theta_{iv'} \right\rangle \right|^2 \delta(E_{fv''} - E_{iv'}). \quad (\text{S17})$$

Considering that the potential energy surface for the excited state is assumed to be the same as that for the ground state except for a rigid displacement in the normal-mode coordinate, Eq. 17 can be reduced as follows [4–8]:

$$W_{f \rightarrow i} = \frac{1}{\hbar^2} \left( \frac{\omega_l}{2\hbar} |R_l(fi)|^2 \right) \sqrt{\frac{2\pi}{\sum_j S_j \omega_j^2 (2\bar{n}_j + 1)}} \exp \left[ -\frac{(\omega_{fi} + \omega_l + \sum_j S_j \omega_j)^2}{2 \sum_j S_j \omega_j^2 (2\bar{n}_j + 1)} \right], \quad (\text{S18})$$

where  $\hbar\omega_{fi}$  is the energy gap between the final state and the initial state,  $S_j$  is the Huang–Rhys factor for the  $j$ -th mode,  $\sum_j S_j \omega_j$  is the sum of the relaxation energies for all modes except the promoting mode  $l$ ,  $\bar{n}_j$  is the Boltzmann averaged number of phonon for  $j$ -th mode. The Huang–Rhys factor  $S_j$  is obtained as

$$S_j = \frac{(\omega_j \Delta Q_j)}{2\hbar}, \quad (\text{S19})$$

where  $\Delta Q_j$  is obtained from the gradient of the excited state energy ( $E^{\text{exc}}$ ):

$$\Delta Q_j = \frac{1}{\omega_j^2} \frac{\partial E^{\text{exc}}}{\partial Q_j}. \quad (\text{S20})$$

### Optimized Structures

**Table S7.** Optimized geometry of LAIH at the  $S_0$  state.

Low Frequencies /  $\text{cm}^{-1}$ :    -2.2799    -1.0016    -0.001    -0.0006    0.0009    1.0367    15.2521    28.8    33.1661

| Center Number | Atomic Number | Coordinates (Angstroms) |          |          |
|---------------|---------------|-------------------------|----------|----------|
|               |               | x                       | y        | z        |
| 1             | 13            | 0.001968                | -1.38995 | -0.88014 |
| 2             | 1             | 0.143758                | -2.78146 | -0.13427 |
| 3             | 1             | -0.19394                | -1.40489 | -2.45939 |
| 4             | 7             | 1.466383                | -0.23185 | -0.37643 |
| 5             | 6             | 1.249891                | 1.06439  | -0.14561 |
| 6             | 6             | -0.02757                | 1.644683 | -0.08189 |
| 7             | 1             | -0.04051                | 2.716578 | 0.043738 |
| 8             | 7             | -1.42771                | -0.31002 | -0.15193 |
| 9             | 6             | -1.28378                | 1.006462 | -0.02537 |
| 10            | 6             | 3.411206                | 2.140809 | -0.86236 |
| 11            | 1             | 3.406225                | 1.514826 | -1.74485 |
| 12            | 6             | 2.384649                | 2.016877 | 0.075484 |
| 13            | 6             | 4.425089                | 3.073612 | -0.68169 |
| 14            | 1             | 5.211482                | 3.162525 | -1.42429 |
| 15            | 6             | 4.432133                | 3.890254 | 0.445692 |
| 16            | 1             | 5.227587                | 4.61444  | 0.589441 |
| 17            | 6             | 3.411867                | 3.776276 | 1.384614 |
| 18            | 1             | 3.408083                | 4.409138 | 2.266303 |
| 19            | 6             | 2.390387                | 2.851163 | 1.195833 |
| 20            | 1             | 1.595155                | 2.765653 | 1.929137 |
| 21            | 6             | -2.44465                | 1.932037 | 0.188506 |
| 22            | 6             | -3.42031                | 1.712954 | 1.163798 |
| 23            | 1             | -3.37917                | 0.827914 | 1.782729 |
| 24            | 6             | -4.45032                | 2.627763 | 1.35363  |
| 25            | 1             | -5.19406                | 2.441138 | 2.121493 |
| 26            | 6             | -4.53062                | 3.771072 | 0.56512  |
| 27            | 1             | -5.33894                | 4.480264 | 0.711575 |
| 28            | 6             | -3.5682                 | 3.996704 | -0.41401 |
| 29            | 1             | -3.62317                | 4.880347 | -1.04161 |
| 30            | 6             | -2.53242                | 3.087963 | -0.5959  |
| 31            | 1             | -1.79199                | 3.267089 | -1.36807 |
| 32            | 6             | 2.769431                | -0.8209  | -0.17275 |
| 33            | 6             | 3.243803                | -1.01818 | 1.140573 |
| 34            | 6             | 4.488471                | -1.623   | 1.312937 |
| 35            | 1             | 4.867712                | -1.77931 | 2.317386 |
| 36            | 6             | 5.244663                | -2.04448 | 0.229907 |
| 37            | 1             | 6.210319                | -2.51474 | 0.38667  |
| 38            | 6             | 4.749894                | -1.87411 | -1.05327 |
| 39            | 1             | 5.335317                | -2.21982 | -1.89902 |
| 40            | 6             | 3.513463                | -1.26939 | -1.28218 |
| 41            | 6             | -2.70567                | -0.97257 | -0.05454 |
| 42            | 6             | -2.97394                | -1.7534  | 1.089571 |
| 43            | 6             | -4.20467                | -2.4036  | 1.174003 |
| 44            | 1             | -4.43276                | -2.99518 | 2.054913 |
| 45            | 6             | -5.13896                | -2.31725 | 0.152711 |
| 46            | 1             | -6.09132                | -2.83118 | 0.237415 |
| 47            | 6             | -4.83892                | -1.58577 | -0.98541 |
| 48            | 1             | -5.56128                | -1.54128 | -1.794   |

|    |   |          |          |          |
|----|---|----------|----------|----------|
| 49 | 6 | -3.62593 | -0.90868 | -1.12032 |
| 50 | 6 | 2.424497 | -0.67492 | 2.376895 |
| 51 | 1 | 1.579482 | -0.05467 | 2.072296 |
| 52 | 6 | 1.847015 | -1.95642 | 2.995817 |
| 53 | 1 | 1.263455 | -2.52087 | 2.264915 |
| 54 | 1 | 1.199313 | -1.71476 | 3.845364 |
| 55 | 1 | 2.649184 | -2.60723 | 3.358886 |
| 56 | 6 | 3.219523 | 0.116937 | 3.422172 |
| 57 | 1 | 4.017325 | -0.48621 | 3.865819 |
| 58 | 1 | 2.558825 | 0.428378 | 4.237627 |
| 59 | 1 | 3.673637 | 1.011188 | 2.988933 |
| 60 | 6 | 3.012848 | -1.15274 | -2.71606 |
| 61 | 1 | 2.116906 | -0.52664 | -2.71497 |
| 62 | 6 | 2.614172 | -2.53173 | -3.26332 |
| 63 | 1 | 3.487907 | -3.1887  | -3.32758 |
| 64 | 1 | 2.184484 | -2.43536 | -4.265   |
| 65 | 1 | 1.87247  | -3.0221  | -2.62903 |
| 66 | 6 | 4.035409 | -0.50163 | -3.65856 |
| 67 | 1 | 4.379996 | 0.469614 | -3.29357 |
| 68 | 1 | 3.588763 | -0.3516  | -4.64608 |
| 69 | 1 | 4.918784 | -1.13305 | -3.79272 |
| 70 | 6 | -1.97984 | -1.92389 | 2.232306 |
| 71 | 1 | -1.05551 | -1.41384 | 1.95276  |
| 72 | 6 | -1.64326 | -3.40454 | 2.456354 |
| 73 | 1 | -2.5222  | -3.96817 | 2.784308 |
| 74 | 1 | -0.87884 | -3.50535 | 3.232499 |
| 75 | 1 | -1.26254 | -3.86433 | 1.542003 |
| 76 | 6 | -2.47834 | -1.29631 | 3.542395 |
| 77 | 1 | -2.64643 | -0.22022 | 3.449486 |
| 78 | 1 | -1.73967 | -1.44712 | 4.335941 |
| 79 | 1 | -3.41643 | -1.75481 | 3.871189 |
| 80 | 6 | -3.35478 | -0.16342 | -2.41989 |
| 81 | 1 | -2.40174 | 0.360522 | -2.32425 |
| 82 | 6 | -3.21568 | -1.14156 | -3.59559 |
| 83 | 1 | -2.41229 | -1.85985 | -3.42068 |
| 84 | 1 | -2.98538 | -0.59487 | -4.51574 |
| 85 | 1 | -4.14553 | -1.69589 | -3.75926 |
| 86 | 6 | -4.43935 | 0.879942 | -2.72261 |
| 87 | 1 | -5.40039 | 0.40309  | -2.93923 |
| 88 | 1 | -4.16043 | 1.466801 | -3.60357 |
| 89 | 1 | -4.58536 | 1.567842 | -1.88723 |

**Table S8.** Optimized geometry of LAIH at the S<sub>1</sub> state.

Low Frequencies / cm<sup>-1</sup>:      -0.0013    -0.0011    -0.0008    1.2969    1.851    2.621    10.9357    25.6479    32.5637

| Center Number | Atomic Number | Coordinates (Angstroms) |           |           |
|---------------|---------------|-------------------------|-----------|-----------|
|               |               | x                       | y         | z         |
| 1             | 13            | 0.014287                | -1.38591  | -0.789451 |
| 2             | 1             | 0.18062                 | -2.785505 | -0.071401 |
| 3             | 1             | -0.2787                 | -1.355357 | -2.357984 |
| 4             | 7             | 1.486005                | -0.239718 | -0.394047 |
| 5             | 6             | 1.275097                | 1.103218  | -0.220406 |
| 6             | 6             | -0.035511               | 1.63929   | -0.116389 |
| 7             | 1             | -0.053932               | 2.716641  | -0.052782 |
| 8             | 7             | -1.424217               | -0.329165 | -0.042392 |
| 9             | 6             | -1.320278               | 1.032386  | -0.015168 |
| 10            | 6             | 3.50807                 | 1.935171  | -1.016493 |
| 11            | 1             | 3.5785                  | 1.084639  | -1.680414 |
| 12            | 6             | 2.382906                | 2.075431  | -0.185283 |
| 13            | 6             | 4.516853                | 2.886792  | -1.022376 |
| 14            | 1             | 5.366817                | 2.757513  | -1.685172 |
| 15            | 6             | 4.442002                | 4.005006  | -0.1934   |

|    |   |           |           |           |
|----|---|-----------|-----------|-----------|
| 16 | 1 | 5.234784  | 4.74576   | -0.197524 |
| 17 | 6 | 3.338078  | 4.158036  | 0.640976  |
| 18 | 1 | 3.268438  | 5.017069  | 1.301043  |
| 19 | 6 | 2.324507  | 3.208649  | 0.64682   |
| 20 | 1 | 1.49012   | 3.333056  | 1.329313  |
| 21 | 6 | -2.456028 | 1.945876  | 0.203062  |
| 22 | 6 | -3.525713 | 1.63059   | 1.061756  |
| 23 | 1 | -3.555436 | 0.672467  | 1.561609  |
| 24 | 6 | -4.547212 | 2.539927  | 1.298692  |
| 25 | 1 | -5.351286 | 2.268011  | 1.975388  |
| 26 | 6 | -4.546634 | 3.789258  | 0.682293  |
| 27 | 1 | -5.350093 | 4.494581  | 0.866759  |
| 28 | 6 | -3.502111 | 4.116255  | -0.179166 |
| 29 | 1 | -3.49085  | 5.077977  | -0.682532 |
| 30 | 6 | -2.47601  | 3.212473  | -0.415012 |
| 31 | 1 | -1.695391 | 3.480594  | -1.11884  |
| 32 | 6 | 2.736599  | -0.838708 | -0.053583 |
| 33 | 6 | 3.208453  | -0.794011 | 1.28201   |
| 34 | 6 | 4.405116  | -1.438684 | 1.584021  |
| 35 | 1 | 4.7697    | -1.422593 | 2.605975  |
| 36 | 6 | 5.128069  | -2.124612 | 0.618397  |
| 37 | 1 | 6.057143  | -2.621028 | 0.879929  |
| 38 | 6 | 4.646535  | -2.178577 | -0.680314 |
| 39 | 1 | 5.211101  | -2.717728 | -1.434128 |
| 40 | 6 | 3.457904  | -1.548251 | -1.043827 |
| 41 | 6 | -2.662449 | -1.024888 | -0.067542 |
| 42 | 6 | -2.912404 | -1.944025 | 0.985791  |
| 43 | 6 | -4.110947 | -2.653009 | 0.980034  |
| 44 | 1 | -4.324616 | -3.341555 | 1.791034  |
| 45 | 6 | -5.040542 | -2.489038 | -0.036551 |
| 46 | 1 | -5.969752 | -3.049987 | -0.022863 |
| 47 | 6 | -4.770041 | -1.613609 | -1.080098 |
| 48 | 1 | -5.488253 | -1.51535  | -1.88758  |
| 49 | 6 | -3.592255 | -0.873515 | -1.128494 |
| 50 | 6 | 2.412693  | -0.183323 | 2.427244  |
| 51 | 1 | 1.57219   | 0.373631  | 2.012522  |
| 52 | 6 | 1.825077  | -1.292205 | 3.314029  |
| 53 | 1 | 1.227384  | -1.995225 | 2.72762   |
| 54 | 1 | 1.186064  | -0.861082 | 4.091844  |
| 55 | 1 | 2.618584  | -1.861816 | 3.808257  |
| 56 | 6 | 3.239699  | 0.799731  | 3.265005  |
| 57 | 1 | 4.05255   | 0.294312  | 3.795268  |
| 58 | 1 | 2.604911  | 1.274971  | 4.019699  |
| 59 | 1 | 3.676664  | 1.58496   | 2.643872  |
| 60 | 6 | 3.005825  | -1.629471 | -2.496017 |
| 61 | 1 | 2.15689   | -0.953306 | -2.623142 |
| 62 | 6 | 2.530834  | -3.045651 | -2.852163 |
| 63 | 1 | 3.356433  | -3.761727 | -2.782546 |
| 64 | 1 | 2.14484   | -3.071396 | -3.87596  |
| 65 | 1 | 1.73753   | -3.389277 | -2.183919 |
| 66 | 6 | 4.096918  | -1.181275 | -3.479436 |
| 67 | 1 | 4.471614  | -0.18008  | -3.249302 |
| 68 | 1 | 3.696364  | -1.164395 | -4.497574 |
| 69 | 1 | 4.951997  | -1.863896 | -3.475029 |
| 70 | 6 | -1.959263 | -2.117615 | 2.159874  |
| 71 | 1 | -1.034916 | -1.591432 | 1.9156    |
| 72 | 6 | -1.606167 | -3.588187 | 2.408885  |
| 73 | 1 | -2.47766  | -4.166363 | 2.73174   |
| 74 | 1 | -0.8541   | -3.662706 | 3.200635  |
| 75 | 1 | -1.198479 | -4.053918 | 1.509066  |
| 76 | 6 | -2.522546 | -1.479003 | 3.438783  |
| 77 | 1 | -2.707818 | -0.408949 | 3.312914  |
| 78 | 1 | -1.813403 | -1.599638 | 4.263827  |
| 79 | 1 | -3.464778 | -1.951569 | 3.734952  |
| 80 | 6 | -3.330496 | -0.011282 | -2.354653 |
| 81 | 1 | -2.389928 | 0.522012  | -2.207916 |

|    |   |           |           |           |
|----|---|-----------|-----------|-----------|
| 82 | 6 | -3.164477 | -0.884361 | -3.608152 |
| 83 | 1 | -2.361669 | -1.613485 | -3.481396 |
| 84 | 1 | -2.92052  | -0.257937 | -4.47215  |
| 85 | 1 | -4.088107 | -1.425255 | -3.837838 |
| 86 | 6 | -4.435415 | 1.030759  | -2.577492 |
| 87 | 1 | -5.387446 | 0.551348  | -2.826482 |
| 88 | 1 | -4.169342 | 1.683695  | -3.414553 |
| 89 | 1 | -4.591438 | 1.655029  | -1.695842 |

*Electronic Transitions*

**Table S9.** Result of TD-DFT calculation for LAIH at the S<sub>0</sub> geometry.

| Excited State | Energy / eV | Wavelength / nm | <i>f</i> | Composition       | Coefficient |
|---------------|-------------|-----------------|----------|-------------------|-------------|
| 1             | 3.5725      | 347.05          | 0.4205   | HOMO -> LUMO      | 0.68764     |
| 2             | 4.5125      | 274.76          | 0.0302   | HOMO-4 -> LUMO    | 0.17965     |
|               |             |                 |          | HOMO-1 -> LUMO    | 0.63718     |
| 3             | 4.6946      | 264.1           | 0.1044   | HOMO-4 -> LUMO    | 0.58276     |
|               |             |                 |          | HOMO-3 -> LUMO    | 0.15636     |
|               |             |                 |          | HOMO-2 -> LUMO    | -0.21328    |
|               |             |                 |          | HOMO-1 -> LUMO    | -0.17943    |
| 4             | 5.0029      | 247.83          | 0.0023   | HOMO-4 -> LUMO    | 0.14193     |
|               |             |                 |          | HOMO-3 -> LUMO    | 0.27789     |
|               |             |                 |          | HOMO-2 -> LUMO    | 0.50349     |
|               |             |                 |          | HOMO-2 -> LUMO+2  | -0.10187    |
|               |             |                 |          | HOMO-2 -> LUMO+17 | 0.11441     |
|               |             |                 |          | HOMO-1 -> LUMO+15 | 0.13189     |
| 5             | 5.0485      | 245.59          | 0.0186   | HOMO-4 -> LUMO    | -0.23696    |
|               |             |                 |          | HOMO-4 -> LUMO+11 | 0.10964     |
|               |             |                 |          | HOMO-3 -> LUMO    | 0.52714     |
|               |             |                 |          | HOMO-2 -> LUMO    | -0.22196    |
| 6             | 5.1426      | 241.09          | 0.0706   | HOMO-8 -> LUMO    | -0.17543    |
|               |             |                 |          | HOMO-8 -> LUMO+4  | 0.11995     |
|               |             |                 |          | HOMO-7 -> LUMO    | 0.21432     |
|               |             |                 |          | HOMO-7 -> LUMO+2  | 0.17719     |
|               |             |                 |          | HOMO-6 -> LUMO    | 0.24025     |
|               |             |                 |          | HOMO-5 -> LUMO    | 0.4102      |
|               |             |                 |          | HOMO-5 -> LUMO+4  | 0.11136     |
|               |             |                 |          | HOMO-4 -> LUMO+4  | -0.10515    |
| 7             | 5.1741      | 239.62          | 0.0405   | HOMO-8 -> LUMO    | -0.12651    |
|               |             |                 |          | HOMO-8 -> LUMO+2  | -0.12703    |
|               |             |                 |          | HOMO-8 -> LUMO+7  | -0.10842    |
|               |             |                 |          | HOMO-7 -> LUMO    | 0.35163     |
|               |             |                 |          | HOMO-6 -> LUMO    | -0.11684    |
|               |             |                 |          | HOMO-6 -> LUMO+2  | 0.15507     |
|               |             |                 |          | HOMO-5 -> LUMO    | -0.27419    |
|               |             |                 |          | HOMO-5 -> LUMO+4  | 0.10604     |
|               |             |                 |          | HOMO -> LUMO+2    | -0.21677    |
|               |             |                 |          | HOMO -> LUMO+4    | 0.14914     |
| 8             | 5.1882      | 238.97          | 0.0338   |                   |             |

|    |        |        |        |                   |          |
|----|--------|--------|--------|-------------------|----------|
|    |        |        |        | HOMO-8 -> LUMO    | -0.15994 |
|    |        |        |        | HOMO-7 -> LUMO    | -0.15358 |
|    |        |        |        | HOMO-7 -> LUMO+2  | 0.10618  |
|    |        |        |        | HOMO-6 -> LUMO    | 0.30303  |
|    |        |        |        | HOMO-6 -> LUMO+2  | -0.18771 |
|    |        |        |        | HOMO-5 -> LUMO    | -0.24322 |
|    |        |        |        | HOMO-5 -> LUMO+7  | -0.13398 |
|    |        |        |        | HOMO-2 -> LUMO    | -0.13938 |
|    |        |        |        | HOMO-1 -> LUMO+7  | 0.11772  |
|    |        |        |        | HOMO -> LUMO+2    | -0.28678 |
| 9  | 5.2226 | 237.4  | 0.0589 |                   |          |
|    |        |        |        | HOMO-6 -> LUMO    | 0.1927   |
|    |        |        |        | HOMO-5 -> LUMO    | -0.37032 |
|    |        |        |        | HOMO-2 -> LUMO    | 0.11722  |
|    |        |        |        | HOMO -> LUMO+2    | 0.46562  |
| 10 | 5.2829 | 234.69 | 0.0207 |                   |          |
|    |        |        |        | HOMO-4 -> LUMO+11 | -0.21033 |
|    |        |        |        | HOMO-4 -> LUMO+13 | 0.24298  |
|    |        |        |        | HOMO-3 -> LUMO    | 0.25721  |
|    |        |        |        | HOMO-3 -> LUMO+11 | 0.11939  |
|    |        |        |        | HOMO-3 -> LUMO+13 | 0.11751  |
|    |        |        |        | HOMO-3 -> LUMO+14 | -0.12127 |
|    |        |        |        | HOMO-3 -> LUMO+15 | -0.12431 |
|    |        |        |        | HOMO-3 -> LUMO+16 | -0.1808  |
|    |        |        |        | HOMO -> LUMO+2    | 0.16059  |
|    |        |        |        | HOMO -> LUMO+11   | -0.14276 |
|    |        |        |        | HOMO -> LUMO+13   | 0.17414  |
| 11 | 5.3441 | 232    | 0.0468 |                   |          |
|    |        |        |        | HOMO-8 -> LUMO    | 0.19723  |
|    |        |        |        | HOMO-3 -> LUMO    | 0.1082   |
|    |        |        |        | HOMO-2 -> LUMO    | 0.2483   |
|    |        |        |        | HOMO-2 -> LUMO+17 | -0.17309 |
|    |        |        |        | HOMO-2 -> LUMO+19 | 0.11206  |
|    |        |        |        | HOMO-2 -> LUMO+20 | 0.11196  |
|    |        |        |        | HOMO-1 -> LUMO+2  | 0.15454  |
|    |        |        |        | HOMO-1 -> LUMO+12 | -0.11634 |
|    |        |        |        | HOMO-1 -> LUMO+15 | -0.22248 |
|    |        |        |        | HOMO -> LUMO+2    | -0.20259 |
|    |        |        |        | HOMO -> LUMO+15   | -0.11044 |
| 12 | 5.4084 | 229.24 | 0.1286 |                   |          |
|    |        |        |        | HOMO-8 -> LUMO    | 0.44386  |
|    |        |        |        | HOMO-7 -> LUMO    | 0.17758  |
|    |        |        |        | HOMO-6 -> LUMO    | 0.33161  |
|    |        |        |        | HOMO-2 -> LUMO    | -0.13114 |
| 13 | 5.4686 | 226.72 | 0.0016 |                   |          |
|    |        |        |        | HOMO-7 -> LUMO    | -0.11875 |
|    |        |        |        | HOMO -> LUMO+1    | 0.38884  |
|    |        |        |        | HOMO -> LUMO+4    | 0.38638  |
|    |        |        |        | HOMO -> LUMO+5    | -0.27345 |
|    |        |        |        | HOMO -> LUMO+6    | 0.12886  |
|    |        |        |        | HOMO -> LUMO+7    | 0.11417  |
| 14 | 5.5509 | 223.36 | 0.0129 |                   |          |
|    |        |        |        | HOMO-9 -> LUMO    | -0.27345 |
|    |        |        |        | HOMO -> LUMO+1    | -0.17592 |
|    |        |        |        | HOMO -> LUMO+4    | 0.28169  |
|    |        |        |        | HOMO -> LUMO+6    | 0.19735  |

|    |        |        |        |                   |          |
|----|--------|--------|--------|-------------------|----------|
|    |        |        |        | HOMO -> LUMO+10   | 0.21384  |
|    |        |        |        | HOMO -> LUMO+11   | -0.14795 |
|    |        |        |        | HOMO -> LUMO+12   | -0.11788 |
|    |        |        |        | HOMO -> LUMO+14   | -0.14181 |
|    |        |        |        | HOMO -> LUMO+16   | -0.16111 |
|    |        |        |        | HOMO -> LUMO+17   | -0.13233 |
|    |        |        |        | HOMO -> LUMO+18   | 0.18288  |
| 15 | 5.5799 | 222.2  | 0.026  |                   |          |
|    |        |        |        | HOMO-9 -> LUMO    | -0.15459 |
|    |        |        |        | HOMO -> LUMO+4    | -0.18252 |
|    |        |        |        | HOMO -> LUMO+6    | 0.14743  |
|    |        |        |        | HOMO -> LUMO+7    | 0.54221  |
|    |        |        |        | HOMO -> LUMO+17   | -0.11648 |
| 16 | 5.6235 | 220.47 | 0.0485 |                   |          |
|    |        |        |        | HOMO-9 -> LUMO    | 0.43416  |
|    |        |        |        | HOMO-7 -> LUMO    | -0.11073 |
|    |        |        |        | HOMO-6 -> LUMO    | 0.10077  |
|    |        |        |        | HOMO -> LUMO+6    | 0.15374  |
|    |        |        |        | HOMO -> LUMO+7    | 0.20542  |
|    |        |        |        | HOMO -> LUMO+11   | -0.21733 |
|    |        |        |        | HOMO -> LUMO+12   | -0.16464 |
|    |        |        |        | HOMO -> LUMO+13   | -0.15193 |
|    |        |        |        | HOMO -> LUMO+15   | 0.12202  |
| 17 | 5.6665 | 218.8  | 0.008  |                   |          |
|    |        |        |        | HOMO-9 -> LUMO    | 0.3607   |
|    |        |        |        | HOMO -> LUMO+1    | -0.11645 |
|    |        |        |        | HOMO -> LUMO+4    | 0.13011  |
|    |        |        |        | HOMO -> LUMO+9    | 0.15866  |
|    |        |        |        | HOMO -> LUMO+11   | 0.23613  |
|    |        |        |        | HOMO -> LUMO+12   | 0.18906  |
|    |        |        |        | HOMO -> LUMO+13   | 0.17216  |
|    |        |        |        | HOMO -> LUMO+14   | -0.15881 |
|    |        |        |        | HOMO -> LUMO+15   | -0.10423 |
|    |        |        |        | HOMO -> LUMO+16   | -0.14088 |
|    |        |        |        | HOMO -> LUMO+17   | -0.1543  |
| 18 | 5.7827 | 214.41 | 0.0153 |                   |          |
|    |        |        |        | HOMO-3 -> LUMO+13 | 0.1342   |
|    |        |        |        | HOMO-2 -> LUMO+11 | 0.12853  |
|    |        |        |        | HOMO-2 -> LUMO+12 | 0.13641  |
|    |        |        |        | HOMO-2 -> LUMO+14 | -0.114   |
|    |        |        |        | HOMO-2 -> LUMO+15 | 0.15172  |
|    |        |        |        | HOMO-1 -> LUMO+7  | 0.12396  |
|    |        |        |        | HOMO-1 -> LUMO+17 | -0.1378  |
|    |        |        |        | HOMO -> LUMO+12   | 0.11725  |
|    |        |        |        | HOMO -> LUMO+15   | 0.10076  |
|    |        |        |        | HOMO -> LUMO+16   | 0.26011  |
|    |        |        |        | HOMO -> LUMO+17   | -0.18403 |
|    |        |        |        | HOMO -> LUMO+20   | 0.2127   |
| 19 | 5.8745 | 211.05 | 0.029  |                   |          |
|    |        |        |        | HOMO-3 -> LUMO+11 | 0.14086  |
|    |        |        |        | HOMO-3 -> LUMO+13 | -0.15721 |
|    |        |        |        | HOMO-2 -> LUMO+15 | 0.13262  |
|    |        |        |        | HOMO -> LUMO+1    | 0.22965  |
|    |        |        |        | HOMO -> LUMO+4    | -0.21035 |
|    |        |        |        | HOMO -> LUMO+7    | -0.11278 |
|    |        |        |        | HOMO -> LUMO+9    | -0.14277 |

|    |        |        |        |                   |          |
|----|--------|--------|--------|-------------------|----------|
|    |        |        |        | HOMO -> LUMO+11   | -0.14517 |
|    |        |        |        | HOMO -> LUMO+14   | -0.10278 |
|    |        |        |        | HOMO -> LUMO+18   | 0.216    |
|    |        |        |        | HOMO -> LUMO+19   | 0.11219  |
|    |        |        |        | HOMO -> LUMO+21   | 0.17665  |
| 20 | 5.9468 | 208.49 | 0.0011 |                   |          |
|    |        |        |        | HOMO-3 -> LUMO+11 | -0.12876 |
|    |        |        |        | HOMO-3 -> LUMO+13 | 0.136    |
|    |        |        |        | HOMO-2 -> LUMO+2  | 0.114    |
|    |        |        |        | HOMO-2 -> LUMO+15 | -0.12834 |
|    |        |        |        | HOMO-1 -> LUMO+7  | -0.146   |
|    |        |        |        | HOMO -> LUMO+1    | 0.23388  |
|    |        |        |        | HOMO -> LUMO+4    | -0.10227 |
|    |        |        |        | HOMO -> LUMO+12   | 0.15129  |
|    |        |        |        | HOMO -> LUMO+14   | -0.17766 |
|    |        |        |        | HOMO -> LUMO+17   | -0.18173 |
|    |        |        |        | HOMO -> LUMO+18   | 0.16023  |
|    |        |        |        | HOMO -> LUMO+19   | 0.14689  |
|    |        |        |        | HOMO -> LUMO+21   | 0.15952  |

**Table S10.** Result of TD-DFT calculation for **LAIH** at the **S<sub>i</sub>** geometry.

| Excited State | Energy / eV | Wavelength / nm | <i>f</i> | Composition      | Coefficient |
|---------------|-------------|-----------------|----------|------------------|-------------|
| 1             | 3.0634      | 404.73          | 0.3807   | HOMO -> LUMO     | 0.69035     |
| 2             | 3.9828      | 311.3           | 0.0804   | HOMO-4 -> LUMO   | 0.18012     |
|               |             |                 |          | HOMO-2 -> LUMO   | -0.10827    |
|               |             |                 |          | HOMO-1 -> LUMO   | 0.64545     |
|               |             |                 |          | HOMO-1 -> LUMO+1 | 0.10673     |
| 3             | 4.1321      | 300.05          | 0.1355   | HOMO-4 -> LUMO   | -0.45159    |
|               |             |                 |          | HOMO-2 -> LUMO   | 0.4596      |
|               |             |                 |          | HOMO-1 -> LUMO   | 0.20361     |
| 4             | 4.5449      | 272.8           | 0.0545   | HOMO-5 -> LUMO   | -0.23441    |
|               |             |                 |          | HOMO-4 -> LUMO   | -0.31322    |
|               |             |                 |          | HOMO-3 -> LUMO   | 0.41448     |
|               |             |                 |          | HOMO-2 -> LUMO   | -0.3645     |
| 5             | 4.5617      | 271.79          | 0.0079   | HOMO-4 -> LUMO   | 0.32858     |
|               |             |                 |          | HOMO-3 -> LUMO   | 0.50799     |
|               |             |                 |          | HOMO-2 -> LUMO   | 0.29593     |
| 6             | 4.6642      | 265.82          | 0.1764   | HOMO-5 -> LUMO   | 0.64105     |
|               |             |                 |          | HOMO-4 -> LUMO   | -0.1279     |
|               |             |                 |          | HOMO-3 -> LUMO   | 0.16054     |
|               |             |                 |          | HOMO-2 -> LUMO   | -0.11213    |
| 7             | 4.8647      | 254.87          | 0.0261   | HOMO-6 -> LUMO   | 0.322       |
|               |             |                 |          | HOMO -> LUMO+1   | 0.56191     |
| 8             | 4.8982      | 253.12          | 0.0258   | HOMO-8 -> LUMO   | 0.11695     |
|               |             |                 |          | HOMO-7 -> LUMO   | -0.23536    |
|               |             |                 |          | HOMO-7 -> LUMO+1 | -0.152      |
|               |             |                 |          | HOMO-6 -> LUMO   | 0.4156      |
|               |             |                 |          | HOMO-6 -> LUMO+1 | 0.13986     |
|               |             |                 |          | HOMO-5 -> LUMO+5 | 0.12177     |

|    |        |        |        |                   |          |
|----|--------|--------|--------|-------------------|----------|
|    |        |        |        | HOMO-1 -> LUMO+5  | 0.12642  |
|    |        |        |        | HOMO -> LUMO+1    | -0.32379 |
| 9  | 4.9294 | 251.52 | 0.0246 |                   |          |
|    |        |        |        | HOMO-8 -> LUMO    | 0.38417  |
|    |        |        |        | HOMO-8 -> LUMO+1  | -0.2104  |
|    |        |        |        | HOMO-7 -> LUMO    | 0.39431  |
|    |        |        |        | HOMO-5 -> LUMO+4  | -0.10997 |
|    |        |        |        | HOMO -> LUMO+4    | 0.11165  |
| 10 | 5.0573 | 245.16 | 0.1573 |                   |          |
|    |        |        |        | HOMO-9 -> LUMO+1  | 0.10367  |
|    |        |        |        | HOMO-8 -> LUMO    | 0.39801  |
|    |        |        |        | HOMO-7 -> LUMO    | -0.36899 |
|    |        |        |        | HOMO-6 -> LUMO    | -0.28703 |
|    |        |        |        | HOMO -> LUMO+1    | 0.14368  |
| 11 | 5.1384 | 241.29 | 0.0427 |                   |          |
|    |        |        |        | HOMO-8 -> LUMO    | -0.11451 |
|    |        |        |        | HOMO-4 -> LUMO+11 | 0.11138  |
|    |        |        |        | HOMO-4 -> LUMO+14 | 0.10004  |
|    |        |        |        | HOMO-4 -> LUMO+15 | -0.16787 |
|    |        |        |        | HOMO-2 -> LUMO    | 0.10139  |
|    |        |        |        | HOMO-2 -> LUMO+4  | -0.1219  |
|    |        |        |        | HOMO-2 -> LUMO+11 | 0.10194  |
|    |        |        |        | HOMO-2 -> LUMO+15 | 0.16434  |
|    |        |        |        | HOMO-1 -> LUMO+14 | -0.11188 |
|    |        |        |        | HOMO -> LUMO+4    | 0.30102  |
|    |        |        |        | HOMO -> LUMO+11   | 0.12316  |
|    |        |        |        | HOMO -> LUMO+15   | -0.24995 |
| 12 | 5.2019 | 238.34 | 0.0191 |                   |          |
|    |        |        |        | HOMO-3 -> LUMO    | -0.13583 |
|    |        |        |        | HOMO-3 -> LUMO+5  | 0.10875  |
|    |        |        |        | HOMO-3 -> LUMO+11 | -0.14836 |
|    |        |        |        | HOMO-3 -> LUMO+17 | 0.13164  |
|    |        |        |        | HOMO-3 -> LUMO+18 | 0.11835  |
|    |        |        |        | HOMO-3 -> LUMO+20 | 0.13818  |
|    |        |        |        | HOMO-1 -> LUMO+1  | -0.13545 |
|    |        |        |        | HOMO-1 -> LUMO+11 | -0.18502 |
|    |        |        |        | HOMO-1 -> LUMO+14 | 0.29086  |
|    |        |        |        | HOMO-1 -> LUMO+15 | 0.12603  |
|    |        |        |        | HOMO -> LUMO+11   | -0.18514 |
|    |        |        |        | HOMO -> LUMO+14   | 0.24703  |
| 13 | 5.2634 | 235.56 | 0.0044 |                   |          |
|    |        |        |        | HOMO-9 -> LUMO    | 0.64515  |
| 14 | 5.3503 | 231.73 | 0.0011 |                   |          |
|    |        |        |        | HOMO-2 -> LUMO+15 | -0.1096  |
|    |        |        |        | HOMO -> LUMO+2    | -0.29223 |
|    |        |        |        | HOMO -> LUMO+4    | 0.4166   |
|    |        |        |        | HOMO -> LUMO+5    | 0.25399  |
|    |        |        |        | HOMO -> LUMO+11   | -0.10898 |
|    |        |        |        | HOMO -> LUMO+15   | 0.13004  |
| 15 | 5.4147 | 228.98 | 0.0167 |                   |          |
|    |        |        |        | HOMO -> LUMO+3    | -0.19245 |
|    |        |        |        | HOMO -> LUMO+4    | -0.14492 |
|    |        |        |        | HOMO -> LUMO+5    | 0.51985  |
|    |        |        |        | HOMO -> LUMO+6    | -0.15424 |
|    |        |        |        | HOMO -> LUMO+7    | 0.16934  |
| 16 | 5.4371 | 228.03 | 0.1113 |                   |          |
|    |        |        |        | HOMO -> LUMO+2    | 0.14729  |
|    |        |        |        | HOMO -> LUMO+4    | 0.19113  |
|    |        |        |        | HOMO -> LUMO+10   | -0.2739  |

|    |        |        |        |                   |          |
|----|--------|--------|--------|-------------------|----------|
|    |        |        |        | HOMO -> LUMO+11   | 0.36255  |
|    |        |        |        | HOMO -> LUMO+13   | -0.14035 |
|    |        |        |        | HOMO -> LUMO+14   | 0.103    |
|    |        |        |        | HOMO -> LUMO+15   | 0.24042  |
| 17 | 5.5558 | 223.16 | 0.011  |                   |          |
|    |        |        |        | HOMO -> LUMO+2    | 0.4056   |
|    |        |        |        | HOMO -> LUMO+4    | 0.15591  |
|    |        |        |        | HOMO -> LUMO+5    | 0.10072  |
|    |        |        |        | HOMO -> LUMO+9    | -0.16132 |
|    |        |        |        | HOMO -> LUMO+11   | -0.21373 |
|    |        |        |        | HOMO -> LUMO+16   | 0.17741  |
|    |        |        |        | HOMO -> LUMO+20   | 0.19763  |
|    |        |        |        | HOMO -> LUMO+24   | -0.11186 |
| 18 | 5.6772 | 218.39 | 0.0114 |                   |          |
|    |        |        |        | HOMO-4 -> LUMO+15 | 0.10378  |
|    |        |        |        | HOMO-3 -> LUMO+11 | 0.12106  |
|    |        |        |        | HOMO-3 -> LUMO+14 | -0.18262 |
|    |        |        |        | HOMO-2 -> LUMO+11 | -0.10202 |
|    |        |        |        | HOMO-1 -> LUMO+5  | 0.12199  |
|    |        |        |        | HOMO-1 -> LUMO+11 | -0.1225  |
|    |        |        |        | HOMO -> LUMO+4    | 0.11382  |
|    |        |        |        | HOMO -> LUMO+5    | -0.17115 |
|    |        |        |        | HOMO -> LUMO+14   | 0.12155  |
|    |        |        |        | HOMO -> LUMO+16   | -0.18673 |
|    |        |        |        | HOMO -> LUMO+17   | 0.22611  |
|    |        |        |        | HOMO -> LUMO+18   | 0.19655  |
|    |        |        |        | HOMO -> LUMO+19   | -0.18974 |
|    |        |        |        | HOMO -> LUMO+22   | 0.10492  |
| 19 | 5.8083 | 213.46 | 0.0205 |                   |          |
|    |        |        |        | HOMO-10 -> LUMO   | -0.10419 |
|    |        |        |        | HOMO-6 -> LUMO    | -0.12217 |
|    |        |        |        | HOMO-1 -> LUMO+1  | 0.2365   |
|    |        |        |        | HOMO-1 -> LUMO+5  | 0.13593  |
|    |        |        |        | HOMO -> LUMO+2    | -0.20444 |
|    |        |        |        | HOMO -> LUMO+4    | -0.11127 |
|    |        |        |        | HOMO -> LUMO+6    | -0.10334 |
|    |        |        |        | HOMO -> LUMO+10   | -0.10033 |
|    |        |        |        | HOMO -> LUMO+19   | 0.11112  |
|    |        |        |        | HOMO -> LUMO+20   | 0.19879  |
|    |        |        |        | HOMO -> LUMO+21   | -0.12299 |
|    |        |        |        | HOMO -> LUMO+23   | -0.18605 |
|    |        |        |        | HOMO -> LUMO+24   | -0.12015 |
| 20 | 5.8596 | 211.59 | 0.0008 |                   |          |
|    |        |        |        | HOMO-10 -> LUMO   | 0.37473  |
|    |        |        |        | HOMO-7 -> LUMO    | 0.13442  |
|    |        |        |        | HOMO-6 -> LUMO    | -0.10545 |
|    |        |        |        | HOMO-1 -> LUMO+1  | -0.21311 |
|    |        |        |        | HOMO-1 -> LUMO+5  | 0.29834  |
|    |        |        |        | HOMO-1 -> LUMO+7  | 0.1102   |

## References

1. Lin, S.H. Rate of Interconversion of Electronic and Vibrational Energy. *J. Chem. Phys.* **1966**, *44*, 3759–3767.
2. Huang, K.; Rhys, A. Theory of light absorption and non-radiative transitions in F<sup>-</sup>centres. *Proc. R. Soc. London. Ser. A. Math. Phys. Sci.* **1950**, *204*, 406–423.
3. Kubo, R. Thermal Ionization of Trapped Electrons. *Phys. Rev.* **1952**, *86*, 929–937.

4. Yu, G.; Yin, S.; Liu, Y.; Chen, J.; Xu, X.; Sun, X.; Ma, D.; Zhan, X.; Peng, Q.; Shuai, Z.; et al. Structures, Electronic States, Photoluminescence, and Carrier Transport Properties of 1,1-Disubstituted 2,3,4,5-Tetraphenylsiloles. *J. Am. Chem. Soc.* **2005**, *127*, 6335–6346.
5. Yin, S.; Peng, Q.; Shuai, Z.; Fang, W.; Wang, Y.-H.; Luo, Y. Aggregation-enhanced luminescence and vibronic coupling of silole molecules from first principles. *Phys. Rev. B* **2006**, *73*, 205409.
6. Peng, Q.; Yi, Y.; Shuai, Z.; Shao, J. Toward Quantitative Prediction of Molecular Fluorescence Quantum Efficiency: Role of Duschinsky Rotation. *J. Am. Chem. Soc.* **2007**, *129*, 9333–9339.
7. Peng, Q.; Niu, Y.; Wu, Q.; Gao, X.; Shuai, Z. Theoretical Understanding of AIE Phenomena Through Computational Chemistry. In *Aggregation-Induced Emission: Fundamentals*; John Wiley and Sons Ltd: Chichester, United Kingdom, 2013; pp. 357–398.
8. Jin, J.-L.; Geng, Y.; Su, Z.-M. Recent Theoretical Advances in Understanding the Mechanism of Aggregation-Induced Emission for Small Organic Molecules. In *Aggregation-Induced Emission: Fundamentals*; John Wiley and Sons Ltd: Chichester, United Kingdom, 2013; pp. 399–418.
